# Supplementary material
Source: PubMed Central journal article supplement (PMC5505074)

**A Mild and General Larock Indolization Protocol for the Preparation of Unnatural  
Tryptophans**

Kangway V. Chuang, Madeleine E. Kieffer, Sarah E. Reisman\*

*The Warren and Katharine Schlinger Laboratory of Chemistry and Chemical Engineering  
Division of Chemistry and Chemical Engineering, California Institute of Technology, Pasadena, California  
91125  
reisman@caltech.edu*

**Supporting Information:**

## Table of Contents

|                                                                   |     |
|-------------------------------------------------------------------|-----|
| 1. General Procedures                                             | S3  |
| 2. Preparation of Haloaniline Substrates                          | S4  |
| 3. Preparation of Alkyne Substrates                               | S6  |
| 4. Optimization of Reaction Parameters                            | S10 |
| 5. Substrate Scope – General Procedures and Characterization Data | S11 |
| 6. Stability of the Tryptophan Center                             | S23 |
| 7. Scale-up and Desilylation of Tryptophan 4                      | S24 |
| 8. Total Synthesis of (–)-Aspergilazine A                         | S25 |
| 9. NMR Spectra                                                    | S31 |

**I. General Procedures.** Unless otherwise stated, reactions were performed under a nitrogen atmosphere using freshly dried solvents. Tetrahydrofuran (THF), methylene chloride ( $\text{CH}_2\text{Cl}_2$ ), acetonitrile (MeCN), dimethylformamide (DMF), and toluene (PhMe) were dried by passing through activated alumina columns. 1,4-Dioxane was dried by passing through activated alumina columns or purchased from Sigma-Aldrich (>99.8%, anhydrous). Triethylamine ( $\text{Et}_3\text{N}$ ), diisopropylamine ( $i\text{-Pr}_2\text{NH}$ ), diisopropylethylamine ( $i\text{-Pr}_2\text{NEt}$ ), and dicyclohexylmethylamine ( $\text{Cy}_2\text{NMe}$ ) were distilled over calcium hydride prior to use. Unless otherwise stated, chemicals and reagents were used as received. All reactions were monitored by thin-layer chromatography using EMD/Merck silica gel 60 F254 pre-coated plates (0.25 mm) and were visualized by UV, *p*-anisaldehyde, or  $\text{KMnO}_4$  staining. Flash column chromatography was performed using silica gel (particle size 0.032–0.063) purchased from Silicycle. Optical rotations were measured on a Jasco P-2000 polarimeter using a 100 mm path-length cell at 589 nm.  $^1\text{H}$  and  $^{13}\text{C}$  NMR spectra were recorded on a Varian 400 MR (at 400 MHz and 101 MHz, respectively), a Varian Inova 500 (at 500 MHz and 126 MHz, respectively), or a Varian Inova 600 (at 600 MHz and 150 MHz, respectively), and are reported relative to internal  $\text{CHCl}_3$  ( $^1\text{H}$ ,  $\delta = 7.26$ ), MeCN ( $^1\text{H}$ ,  $\delta = 1.94$ ),  $\text{CH}_2\text{Cl}_2$  ( $^1\text{H}$ ,  $\delta = 5.32$ ) or DMSO ( $^1\text{H}$ ,  $\delta = 2.50$ ), and  $\text{CDCl}_3$  ( $^{13}\text{C}$ ,  $\delta = 77.0$ ), MeCN ( $^{13}\text{C}$ ,  $\delta = 118.26$ ),  $\text{CD}_2\text{Cl}_2$  ( $^{13}\text{C}$ ,  $\delta = 54.0$ ) or DMSO ( $^{13}\text{C}$ ,  $\delta = 40.0$ ). Data for  $^1\text{H}$  NMR spectra are reported as follows: chemical shift ( $\delta$  ppm) (multiplicity, coupling constant (Hz), integration). Multiplicity and qualifier abbreviations are as follows: s = singlet, d = doublet, t = triplet, q = quartet, m = multiplet, br = broad, app = apparent. IR spectra were recorded on a Perkin Elmer Paragon 1000 spectrometer and are reported in frequency of absorption ( $\text{cm}^{-1}$ ). Preparatory HPLC was performed with an Agilent 1200 Series HPLC utilizing an Agilent XDB-C18  $5\mu\text{m}$  column (30 x 250 mm). Analytical SFC was performed with a Mettler SFC supercritical  $\text{CO}_2$  analytical chromatography system with Chiralcel AD-H column (4.6 mm x 25 cm). HRMS were acquired using an Agilent 6200 Series TOF with an Agilent G1978A Multimode source in electrospray ionization (ESI), atmospheric pressure chemical ionization (APCI), or mixed (MM) ionization mode.

## II. Preparation of Haloaniline Substrates

### Bromoaniline 1p

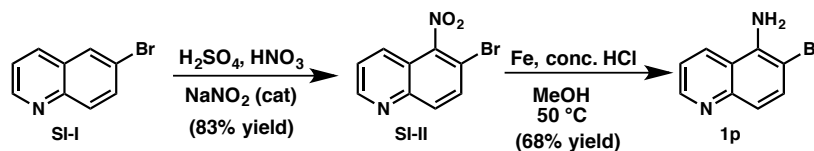

6-Bromoquinoline (SI-I) was purchased from Combi-Blocks and nitrated using a known procedure<sup>1</sup> to give SI-II. SI-II (500 mg, 2.0 mmol, 1.0 equiv) was dissolved in MeOH (6 mL). Fe powder (331 mg, 5.9 mmol, 3.0 equiv) and concentrated HCl (2 mL) were added and the reaction was heated to 50 °C for 1 h. Upon cooling, the reaction was basified with NH<sub>4</sub>OH to pH 9, filtered through celite, and extracted with EtOAc (2 x 10 mL). The combined organic layers were washed with brine, dried over Na<sub>2</sub>SO<sub>4</sub>, filtered, and concentrated *in vacuo*. The crude material was purified by chromatography on silica gel (40% acetone, 60% hexanes) to provide **1p** as a light yellow, amorphous solid (300 mg, 1.3 mmol, 68% yield).

<sup>1</sup>H NMR: (500 MHz, CDCl<sub>3</sub>) δ 8.90 (dd, *J* = 4.2, 1.6 Hz, 1H), 8.16 (ddd, *J* = 8.6, 1.5, 0.9 Hz, 1H), 7.72 (d, *J* = 9.0 Hz, 1H), 7.45 (dd, *J* = 9.0, 0.7 Hz, 1H), 7.39 (dd, *J* = 8.6, 4.2 Hz, 1H), 4.68 (s, 2H);

<sup>13</sup>C NMR: (126 MHz, CDCl<sub>3</sub>) δ 150.3, 148.1, 139.6, 133.3, 129.4, 120.7, 120.2, 118.7, 104.3;

FTIR: (NaCl, thin film): cm<sup>-1</sup>; 3423, 3297, 3162, 1635, 1581, 1569, 1457, 1398, 1357, 1323;

HRMS (MM) calc'd [M+H]<sup>+</sup> 222.9865, found 222.9862.

### Bromoaniline 1m

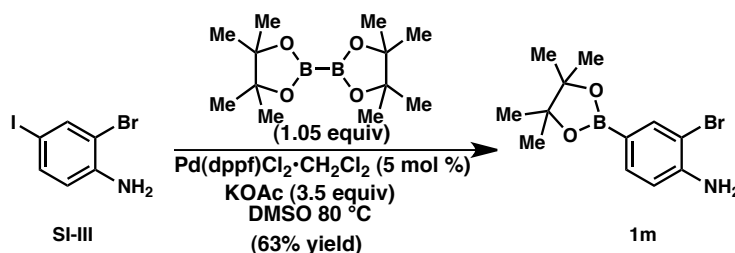

In a glovebox, an oven-dried 2-dram vial was charged with 2-bromo-4-iodoaniline SI-III (500 mg, 1.68 mmol, 1.00 equiv), Pd(dppf)Cl<sub>2</sub>•CH<sub>2</sub>Cl<sub>2</sub> (69 mg, 0.08 mmol, 0.05 equiv), bis(pinacolato)diboron (448 mg, 1.77 mmol, 1.05 equiv), KOAc (557 mg, 5.9 mmol, 3.5 equiv), and DMSO (5 mL). The vial was sealed, removed from the glovebox and heated to 80 °C. After 24 h, the reaction was cooled, filtered through a plug of Celite, and the plug was rinsed with EtOAc. The resulting filtrate was then washed with water (3 x 20 mL), dried over anhydrous Na<sub>2</sub>SO<sub>4</sub>, filtered, and

<sup>1</sup> Bounaud, P-Y.; Smith, C. R.; Jefferson, E. A. (SGX Pharmaceuticals Inc). Bicyclic Triazoles as Protein Kinase Modulators. US2007/081841, July 24, 2008.

concentrated *in vacuo*. The crude reaction mixture was purified by chromatography on silica gel (10% EtOAc, 90% hexanes) to give white, amorphous solid **1m** (315 mg, 1.06 mmol, 63% yield).

**<sup>1</sup>H NMR:** (500 MHz, CDCl<sub>3</sub>) δ 7.86 (d, *J* = 1.3 Hz, 1H), 7.52 (dd, *J* = 7.9, 1.4 Hz, 1H), 6.72 (d, *J* = 7.9 Hz, 1H), 1.32 (s, 12H);

**<sup>13</sup>C NMR:** (126 MHz, CDCl<sub>3</sub>) δ 146.6, 139.2, 135.0, 114.8, 108.8, 83.6, 24.8 (Boron-bearing *ipso*-carbon was not observed);

**FTIR:** (NaCl, thin film): cm<sup>-1</sup>; 3477, 3368, 2977, 2930, 1616, 1594, 1385, 1372, 1319, 1143, 1098;

**HRMS:** (MM) calc'd [M+H]<sup>+</sup> 297.0645, found 297.0637.

### III. Preparation of Alkyne Substrates

#### Alkyne 2

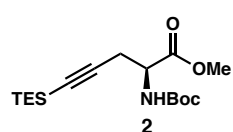

Alkyne **2** was prepared on decagram scale according to the procedure reported by Baran and coworkers<sup>2</sup> with the following modification: Zn(0)-dust (Aldrich, <10  $\mu\text{m}$ , >98%) was freshly activated by the following procedure: Zinc powder (50 g) was added to a rapidly stirring solution of 2% aqueous HCl and stirred for  $\sim$ 3 minutes. The aqueous solution was decanted and the zinc was washed in rapid succession with EtOH (150 mL), acetone (2 x 150 mL), and anhydrous ether (300 mL). The zinc was rapidly filtered and collected into a 500-mL round bottomed flask that was evacuated to <1 mmHg and dried at 80  $^{\circ}\text{C}$  for a minimum of two hours. The freshly activated zinc is quickly weighed out from this flask prior to the reaction.

#### Alkyne 4a

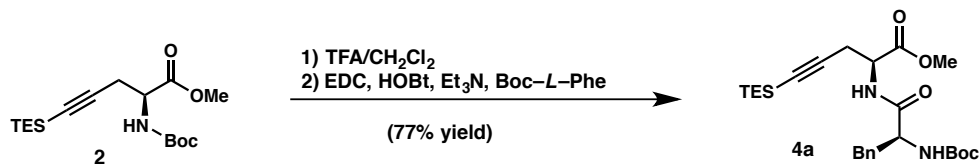

To a solution of alkyne **2** (500 mg, 1.5 mmol, 1.00 equiv) in CH<sub>2</sub>Cl<sub>2</sub> (15 mL) at 0  $^{\circ}\text{C}$  was added TFA (2.0 mL). The mixture was warmed to room temperature and stirred for 3 hours, after which PhMe (30 mL) was added and the reaction was concentrated. The resultant oil was dissolved in THF (10 mL) and cooled to 0  $^{\circ}\text{C}$  under a positive pressure of N<sub>2</sub>. In a separate flask, (*L*)-Boc-Phe-OH (466 mg, 1.8 mmol, 1.2 equiv) was dissolved in THF (24 mL) and cooled to 0  $^{\circ}\text{C}$ . EDC (337 mg, 1.8 mmol, 1.2 equiv), anhydrous HOBt (277 mg, 2.0 mmol, 1.4 equiv), and Et<sub>3</sub>N (610  $\mu\text{L}$ , 4.4 mmol, 3.0 equiv) were added sequentially. After stirring for 5 minutes, the alkyne was transferred via cannula. The reaction was warmed to room temperature and stirred for 12 h. The heterogeneous reaction was concentrated and purified by chromatography on silica gel (20% EtOAc, 80% hexanes) to provide alkyne **4a** as a colorless oil (552 mg, 1.13 mmol, 77% yield).

**<sup>1</sup>H NMR:** (500 MHz, CDCl<sub>3</sub>, Major Rotamer)  $\delta$  7.28 – 7.22 (m, 2H), 7.19 (dd,  $J$  = 7.1, 7.1 Hz, 3H), 6.77 (d,  $J$  = 6.3 Hz, 1H), 5.16 (d,  $J$  = 5.9 Hz, 1H), 4.67 (d,  $J$  = 6.5 Hz, 1H), 4.44 (d,  $J$  = 6.1 Hz, 1H), 3.70 (s, 3H), 3.11 (dd,  $J$  = 13.9, 6.3 Hz, 1H), 2.98 (dd,  $J$  = 12.8, 6.6 Hz, 1H), 2.73 (dd,  $J$  = 17.0, 4.0 Hz, 1H), 2.57 (dd,  $J$  = 17.1, 5.3 Hz, 1H), 1.35 (s, 9H), 0.98 – 0.87 (m, 9H), 0.57 – 0.46 (m, 6H);

**<sup>13</sup>C NMR:** (126 MHz, CDCl<sub>3</sub>)  $\delta$  170.8, 170.4, 155.2, 136.4, 129.2, 128.4, 126.7, 101.2, 85.5, 79.8, 66.9, 55.3, 52.4, 50.8, 38.4, 28.0, 23.5, 7.2, 4.1;

**FTIR:** (NaCl, thin film): cm<sup>-1</sup>; 3419, 3335, 2963, 2868, 2179, 1743, 1661, 1518, 1451, 1365;

**$[\alpha]_{\text{D}}^{25}$**  = +52.7 ( $c$  = 5.4, CHCl<sub>3</sub>);

**HRMS:** (MM) calc'd  $[\text{M}+\text{H}]^{+}$  489.2779, found 489.2793.

<sup>2</sup> Newhouse, T.; Lewis, C. A.; Baran, P. S. *J. Am. Chem. Soc.* **2009**, *131*, 6360.

## Alkyne 4b

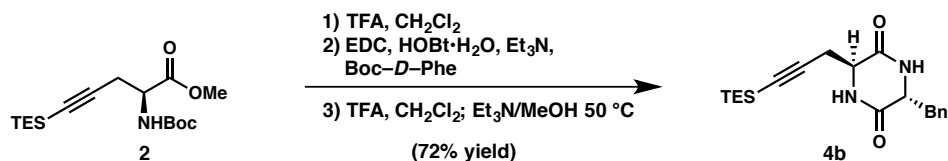

Alkyne **2** (1.02 g, 3.0 mmol, 1.00 equiv) was dissolved in a 5:1 mixture of CH<sub>2</sub>Cl<sub>2</sub>:TFA (20 mL). After one hour, the reaction was concentrated *in vacuo* and dried on high vacuum, then redissolved in 34 mL anhydrous CH<sub>2</sub>Cl<sub>2</sub>. The solution was cooled to 0 °C under N<sub>2</sub> and EDC·HCl (0.862 g, 4.5 mmol, 1.50 equiv) and HOBT·H<sub>2</sub>O (0.680 g, 4.5 mmol, 1.50 equiv) were added sequentially. Et<sub>3</sub>N (1.88 mL, 13.5 mmol, 4.5 equiv) was then added dropwise by syringe. The mixture was then stirred for 5 minutes, and Boc-*D*-phenylalanine (1.59 g, 6.0 mmol, 2.0 equiv) was added in a single portion. The reaction was slowly warmed to 23 °C over 2 hours and stirring continued for 20 hours. The reaction was then quenched with 1 N HCl (500 mL) and extracted with EtOAc (3 x 250 mL), then the combined organics washed with saturated aqueous NaHCO<sub>3</sub> (500 mL), and aqueous layer back-extracted with EtOAc (200 mL). The combined organic layers were then dried over anhydrous Na<sub>2</sub>SO<sub>4</sub>, filtered, and concentrated *in vacuo* to afford crude dipeptide as a viscous oil.

The residue was then dissolved in CH<sub>2</sub>Cl<sub>2</sub> (50 mL) and trifluoroacetic acid (15 mL) was added dropwise by addition funnel at room temperature over 10 minutes. Stirring was continued for 20 minutes, then the solution was diluted with toluene (100 mL) and the mixture was concentrated *in vacuo* to afford a thick oil. The residue was then redissolved in MeOH (35 mL) and the mixture was cooled to 0 °C. Et<sub>3</sub>N (27 mL) was then added dropwise to the stirring solution over 10 minutes by addition funnel. Upon completion of the addition, the cooling bath was removed and the reaction was heated to 50 °C over 16 h. The mixture was cooled to 0 °C to yield a milky solution, which was filtered and washed with cold methanol to provide alkyne **4b** as a colorless solid (771 mg, 72% yield)

**<sup>1</sup>H NMR:** (500 MHz, DMSO-*d*<sub>6</sub>) δ 8.35 (d, *J* = 1.6 Hz, 1H), 8.02 (d, *J* = 1.0 Hz, 1H), 7.29 – 7.19 (m, 3H), 7.18 – 7.12 (m, 2H), 4.15 (s, 1H), 3.19 – 3.11 (m, 2H), 2.88 (dd, *J* = 13.5, 4.9 Hz, 1H), 2.63 (dd, *J* = 16.9, 3.2 Hz, 1H), 2.40 (dd, *J* = 17.0, 4.7 Hz, 1H), 0.91 (t, *J* = 7.9 Hz, 9H), 0.50 (q, *J* = 7.9 Hz, 6H);

**<sup>13</sup>C NMR:** (126 MHz, DMSO-*d*<sub>6</sub>) δ 166.6, 166.0, 135.8, 130.1, 128.0, 126.7, 104.0, 83.9, 55.4, 52.6, 38.4, 24.8, 7.3, 3.9;

**FTIR:** (NaCl, thin film): cm<sup>-1</sup>; 2916, 2350, 1732, 1651, 1557, 1455;

**[α]<sub>D</sub><sup>25</sup>** = -19.4 (*c* = 0.28, CHCl<sub>3</sub>);

**HRMS:** (MM) calc'd [M+H]<sup>+</sup> 357.1993, found 357.1992.

## Alkyne 4c

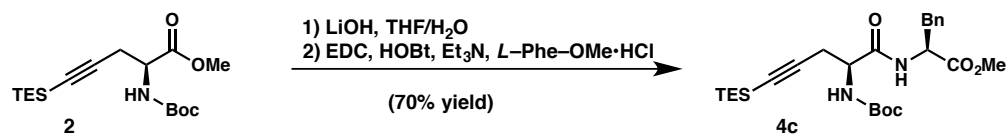

To a solution of alkyne **2** (550 mg, 1.5 mmol, 1.00 equiv) in THF/H<sub>2</sub>O (4 mL/2 mL) at 0 °C under a positive pressure of N<sub>2</sub> was added aqueous LiOH (1 M, 1.9 mL, 1.2 equiv). After 1 hour, the reaction was quenched by slow addition of 1 M HCl (3 mL) and Et<sub>2</sub>O (6 mL). The layers were separated and the aqueous was extracted with Et<sub>2</sub>O (3 x 10 mL). The organics were combined, washed with brine, dried over MgSO<sub>4</sub>, filtered, and concentrated *in vacuo* to afford a colorless oil. The oil was dissolved in 24 mL THF and cooled to 0 °C under a positive pressure of N<sub>2</sub>. EDC (337 mg, 1.8 mmol, 1.2 equiv), anhydrous HOBt (277 mg, 2.0 mmol, 1.4 equiv) and Et<sub>3</sub>N (610 μL, 4.4 mmol, 3.0 equiv) were added sequentially. After 5 minutes of stirring, a solution of (*L*)-Phe-OMe·HCl (347 mg, 1.6 mmol, 1.1 equiv) in THF (10 mL) was added via cannula. The reaction was warmed to room temperature and stirred for 12 h. The heterogeneous solution was concentrated and purified by chromatography on silica gel (20% EtOAc, 80% hexanes) to give white, amorphous solid **4c** (500 mg, 1.02 mmol, 70% yield)

**<sup>1</sup>H NMR:** (500 MHz, CDCl<sub>3</sub>, Major Rotamer) δ 7.30 – 7.20 (m, 3H), 7.10 – 7.07 (m, 2H), 6.84 (d, *J* = 4.9 Hz, 1H), 5.25 (s, 1H), 4.81 (ddd, *J* = 7.5, 6.0, 6.0 Hz, 1H), 4.22 (d, *J* = 4.9 Hz, 1H), 3.67 (s, 3H), 3.13 – 3.05 (m, 2H), 2.74 (dd, *J* = 17.1, 6.1 Hz, 1H), 2.65 (dd, *J* = 17.1, 6.5 Hz, 1H), 1.42 (s, 9H), 0.95 (t, *J* = 7.9 Hz, 9H), 0.55 (q, *J* = 7.9 Hz, 6H);

**<sup>13</sup>C NMR:** (126 MHz, CDCl<sub>3</sub>) δ 171.3, 169.9, 155.3, 135.7, 129.1, 128.4, 127.0, 102.5, 85.5, 80.2, 53.4, 53.0, 52.2, 38.0, 28.1, 23.3, 7.4, 4.2;

**FTIR:** (NaCl, thin film): cm<sup>-1</sup>; 3319, 2954, 2935, 2874, 2177, 1746, 1689, 1660, 1527, 1498, 1456, 1367, 1274, 1251, 1172, 1048, 1017;

**[α]<sub>D</sub><sup>25</sup>** = +39.2 (*c* = 4.29, CHCl<sub>3</sub>);

**HRMS:** (MM) calc'd [M-C<sub>4</sub>H<sub>9</sub>]<sup>+</sup> 433.2153, found 433.2138.

## Alkyne 4e

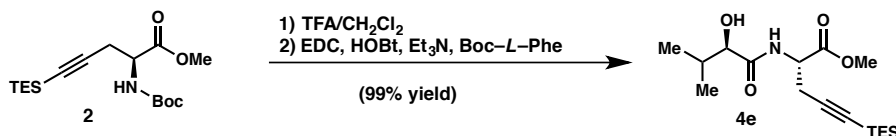

To a solution of alkyne **2** (1.00 g, 2.9 mmol, 1.00 equiv) in CH<sub>2</sub>Cl<sub>2</sub> (30 mL) at 0 °C was added TFA (4 mL). The mixture was warmed to room temperature and stirred for 3 hours, after which PhMe (100 mL) was added and the reaction concentrated. The resultant oil was dissolved in THF (10 mL) and cooled to 0 °C under a positive pressure of N<sub>2</sub>. In a separate flask, (*R*)-2-hydroxy-3-methylbutanoic acid (346 mg, 2.9 mmol, 1.0 equiv) was dissolved in THF (100 mL) and cooled to 0 °C. EDC (674 mg, 3.5 mmol, 1.2 equiv), anhydrous HOBt (554 mg, 4.1 mmol, 1.4 equiv) and <sup>t</sup>Pr<sub>2</sub>NEt (1.5



mL, 8.6 mmol, 3.0 equiv) were added sequentially. After stirring for 5 minutes, the alkyne was added to this solution dropwise via cannula. The reaction was then warmed to room temperature and stirred for 12 h. The heterogeneous reaction was concentrated and purified by chromatography on silica gel (100% EtOAc) to provide alkyne **4e** as a colorless oil (995 mg, 2.9 mmol, 99% yield).

**<sup>1</sup>H NMR:** (500 MHz, CD<sub>3</sub>CN, Major Rotamer) δ 7.43 (d, *J* = 7.6 Hz, 1H), 4.59 (dt, *J* = 8.2, 5.3 Hz, 1H), 3.89 (dd, *J* = 5.5, 3.1 Hz, 1H), 3.71 (d, *J* = 5.6 Hz, 1H), 3.69 (s, 3H), 2.80 (dd, *J* = 17.2, 5.5 Hz, 1H), 2.73 (dd, *J* = 17.2, 5.2 Hz, 1H), 2.07 (heptd, *J* = 6.9, 3.1 Hz, 1H), 1.01 – 0.93 (m, 12H), 0.82 (d, *J* = 6.9 Hz, 3H), 0.61 – 0.52 (m, 6H);

**<sup>13</sup>C NMR:** (126 MHz, CD<sub>3</sub>CN) δ 174.2, 171.7, 103.6, 85.8, 76.4, 53.0, 51.4, 32.7, 23.9, 19.5, 15.9, 7.8, 5.0;

**FTIR:** (NaCl, thin film): cm<sup>-1</sup>; 3385, 2952, 2863, 2176, 1744, 1653, 1507;

**[α]<sub>D</sub><sup>25</sup>** = +89.4 (*c* = 3.40, CHCl<sub>3</sub>);

**HRMS:** (MM) calc'd [M+H]<sup>+</sup> 342.2095, found 342.2087.

#### IV. Optimization of Reaction Parameters

Optimization Procedure – In a glovebox, an oven-dried 1-dram vial was charged with 2-bromoaniline (17.2 mg, 0.1 mmol, 1.0 equiv), alkyne **2** (68.3 mg, 0.2 mmol, 2.0 equiv), base (2.5 equiv), Pd-catalyst (0.05 equiv), and appropriate solvent (0.5 mL). The vial was sealed and heated to the reported temperature while the reaction progress was monitored by UHPLC. Upon consumption of the starting material (2 – 36 h), the vial was cooled and the crude reaction mixture was filtered through a silica plug, thoroughly washed with EtOAc, and concentrated *in vacuo* to provide a crude oil.

The crude residue was dissolved in a standard solution of 2,3,5,6-tetrachloronitrobenzene in DMSO-*d*<sub>6</sub>, and the yield of **3a** was determined by <sup>1</sup>H NMR by integration relative to the internal standard. In entry 11 of Table 1, Pd<sub>2</sub>(dba)<sub>3</sub> and P<sup>t</sup>Bu<sub>3</sub> were prestirred for 1 h before being added to a vial containing the other reagents.

## V. Substrate Scope – Characterization Data

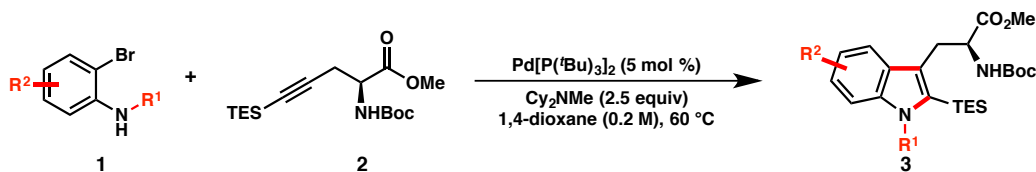

**Glovebox-Free Procedure:** For ease of reaction monitoring, the substrate scope studies were conducted in a nitrogen filled glovebox. However, comparable yields are readily obtained outside of the glovebox utilizing the following protocol – To an oven-dried, 2-dram vial was charged bromoaniline (0.30 mmol, 1.0 equiv), alkyne (0.60 mmol, 2.0 equiv), and Pd[P(<sup>t</sup>Bu)<sub>3</sub>]<sub>2</sub> (0.015 mmol, 0.05 equiv). The vial was evacuated and backfilled with N<sub>2</sub> (3 x) and anhydrous 1,4-dioxane (1.5 mL, 0.2 M) added via syringe. Cy<sub>2</sub>NMe (0.75 mmol, 2.5 equiv) was then added via syringe and the vial was submerged in a preheated oil bath at 60 °C and stirred for the indicated time below. Alternatively the vial may be sealed with a Teflon-lined vial cap and subsequently submerged in an oil bath. Upon cooling, the crude mixture was filtered through a plug of silica gel, which was subsequently rinsed with EtOAc. The filtrate was then concentrated *in vacuo* and the substrate purified via column chromatography on silica gel to provide the tryptophan derivative.

**General Procedure I:** In a glovebox, a 2-dram vial was charged with bromoaniline (0.3 mmol, 1.0 equiv), alkyne **2** (0.6 mmol, 2.0 equiv), Cy<sub>2</sub>NMe (0.75 mmol, 2.5 equiv), Pd[P(<sup>t</sup>Bu)<sub>3</sub>]<sub>2</sub> (0.015 mmol, 0.05 equiv) and anhydrous 1,4-dioxane (1.5 mL, 0.2 M). The vial was sealed and heated to 60 °C until there was complete consumption of starting material (12 – 72 h). In most cases the solution became cloudy as the reaction progressed. Upon cooling, the crude mixture was filtered through a plug of silica, which was subsequently washed with EtOAc. The organics were concentrated and the crude residue was purified by chromatography on silica gel to provide the tryptophan derivative.

**General Procedure II:** In a glovebox, a 2-dram vial was charged with bromoaniline (0.3 mmol, 1.0 equiv), alkyne **2** (0.6 mmol, 2.0 equiv), Cy<sub>2</sub>NMe (0.75 mmol, 2.5 equiv), Pd[P(<sup>t</sup>Bu)<sub>3</sub>]<sub>2</sub> (0.015 mmol, 0.05 equiv) and anhydrous 1,4-dioxane (1.5 mL, 0.2 M). The vial was sealed and heated to 80 °C until there was complete consumption of starting material (12 – 72 h). In most cases, the solution became cloudy as the reaction progressed. Upon cooling, the crude mixture was filtered through a plug of silica, which was subsequently washed with EtOAc. The organics were concentrated and the crude residue was purified by chromatography on silica gel to provide tryptophan derivative.

**General Procedure III:** In a glovebox, a 2-dram vial was charged with bromoaniline (0.3 mmol, 1.0 equiv), alkyne **2** (0.6 mmol, 2.0 equiv), Cy<sub>2</sub>NMe (0.75 mmol, 2.5 equiv), Pd[P(<sup>t</sup>Bu)<sub>3</sub>]<sub>2</sub> (0.015 mmol, 0.05 equiv) and anhydrous 1,4-dioxane (1.5 mL, 0.2 M). The vial was sealed and heated to 80 °C until there was complete consumption of starting material (12 – 72 h). In most cases, the solution became cloudy as the reaction progressed. Upon cooling, the crude

mixture was filtered through a plug of silica, which was subsequently washed with EtOAc. The organics were concentrated and the crude residue was dissolved in 1M TBAF in THF. After 20 minutes, aqueous NH<sub>4</sub>Cl was added and the reaction mixture was partitioned in a separatory funnel. The aqueous layer was back-extracted with EtOAc (3 X 15 mL). The organics were then recombined, washed with brine, dried over Na<sub>2</sub>SO<sub>4</sub>, filtered, and concentrated. The crude residue was purified using silica gel chromatography to provide the tryptophan derivative.

### Tryptophan 3a

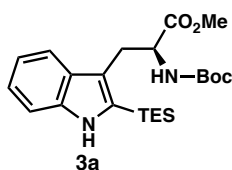

Prepared following *General Procedure I* (36 h). The crude residue was purified by silica gel chromatography (88% hexanes, 12% EtOAc) to afford **3a** as a colorless oil (113.6 mg, 0.26 mmol, 88% yield).

**<sup>1</sup>H NMR:** (500 MHz, CDCl<sub>3</sub>, Major Rotamer) δ 8.04 (s, 1H), 7.57 (d, *J* = 7.9 Hz, 1H), 7.36 (d, *J* = 8.1 Hz, 1H), 7.18 (ddd, *J* = 8.1, 6.9, 1.1 Hz, 1H), 7.09 (t, *J* = 7.4 Hz, 1H), 4.93 (d, *J* = 7.7 Hz, 1H), 4.57 (dd, *J* = 14.4, 7.1 Hz, 1H), 3.63 (s, 3H), 3.36 – 3.18 (m, 2H), 1.36 (s, 9H), 1.05 – 0.98 (m, 9H), 0.97 – 0.89 (m, 6H);

**<sup>13</sup>C NMR:** (126 MHz, CDCl<sub>3</sub>) δ 173.4, 155.1, 138.5, 132.8, 128.6, 122.4, 119.5, 119.3, 118.9, 110.8, 79.6, 54.2, 52.2, 29.3, 28.2, 7.4, 3.7;

**FTIR:** (NaCl, thin film): cm<sup>-1</sup>; 3383, 2954, 2911, 2875, 1739, 1700, 1501, 1456, 1367, 1284, 1164;

**[α]<sub>D</sub><sup>25</sup>** = +1.4 (*c* = 1.4, CHCl<sub>3</sub>);

**HRMS:** (MM) calc'd [M+H]<sup>+</sup> 433.2517, found 433.2519.

### Tryptophan 3b

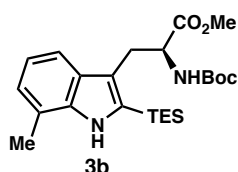

Prepared following *General Procedure I* (36 h). The crude residue was purified by silica gel chromatography (88% hexanes, 12% EtOAc) to afford **3b** as a colorless oil (102.9 mg, 0.230 mmol, 77% yield).

**<sup>1</sup>H NMR:** (500 MHz, CD<sub>3</sub>CN, Major Rotamer) δ 7.75 (d, *J* = 8.4 Hz, 1H), 7.61 (d, *J* = 8.4 Hz, 1H), 7.35 (ddd, *J* = 8.5, 7.1, 1.3 Hz, 1H), 7.27 (ddd, *J* = 7.9, 7.1, 0.9 Hz, 1H), 5.57 (d, *J* = 8.6 Hz, 1H), 4.40 (q, *J* = 7.9 Hz, 1H), 3.54 (s, 3H), 3.37 (dd, *J* = 14.4, 6.7 Hz, 1H), 3.20 (dd, *J* = 14.4, 8.2 Hz, 1H), 2.78 (s, 3H), 1.29 (s, 9H), 1.04 – 0.83 (m, 15H);

**<sup>13</sup>C NMR:** (126 MHz, CD<sub>3</sub>CN) δ 173.4, 171.0, 156.1, 138.0, 137.1, 133.7, 131.2, 125.9, 123.4, 120.4, 115.2, 80.0, 55.9, 52.7, 28.8, 28.4, 27.0, 8.6, 6.8;

**FTIR:** (NaCl, thin film): cm<sup>-1</sup>; 3396, 2954, 2912, 2874, 1704, 1498, 1366, 1279, 1217, 1163, 1018;

**[α]<sub>D</sub><sup>25</sup>** = -5.8 (*c* = 0.40, CHCl<sub>3</sub>);

**HRMS:** (MM) calc'd [M-C<sub>4</sub>H<sub>9</sub>]<sup>+</sup> 391.2048, found 391.2038.

### Tryptophan 3c

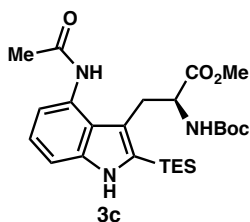

Prepared following *General Procedure II* (12 h). The crude residue was purified by silica gel chromatography (80% hexanes, 20% acetone) to afford **3c** as a white, amorphous solid (114.3 mg, 0.234 mmol, 78% yield).

**<sup>1</sup>H NMR:** (500 MHz, CD<sub>3</sub>CN, Major Rotamer) δ 9.21 (s, 1H), 8.32 (s, 1H), 7.30 (d, *J* = 8.1 Hz, 1H), 7.07 (t, *J* = 7.7 Hz, 1H), 6.93 (d, *J* = 7.4 Hz, 1H), 5.54 (s, 1H), 4.33 (dd, *J* = 15.7, 7.6 Hz, 1H), 3.59 (s, 3H), 3.36 (dd, *J* = 14.7, 6.1 Hz, 1H), 3.05 – 3.00 (m, 1H), 2.13 (s, 3H), 1.34 – 1.18 (m, 9H), 1.03 – 0.89 (m, 15H);

**<sup>13</sup>C NMR:** (126 MHz, CD<sub>3</sub>CN) δ 174.3, 171.1, 156.2, 141.6, 134.4, 130.5, 124.7, 122.8, 119.8, 118.5, 110.7, 79.9, 57.0, 52.6, 29.3, 28.3, 23.8, 7.7, 4.3;

**FTIR:** (NaCl, thin film): cm<sup>-1</sup>; 3313, 2953, 1700, 1672, 1506, 1367, 1168;

[α]<sub>D</sub><sup>25</sup> = -18.3 (*c* = 1.10, CHCl<sub>3</sub>);

**HRMS:** (MM) calc'd [M+H]<sup>+</sup> 490.2732, found 490.2719.

### Tryptophan 3d

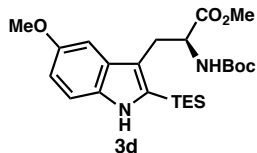

Prepared following *General Procedure I* (36 h). The crude residue was purified by silica gel chromatography (85% hexanes, 15% EtOAc) to afford **3d** as a colorless oil (102.2 mg, 0.220 mmol, 74% yield).

**<sup>1</sup>H NMR:** (500 MHz, CD<sub>3</sub>CN, Major Rotamer) δ 8.95 (s, 1H), 7.28 (d, *J* = 8.8 Hz, 1H), 7.03 (d, *J* = 1.5 Hz, 1H), 6.77 (dd, *J* = 8.8, 2.4 Hz, 1H), 5.53 (d, *J* = 8.2 Hz, 1H), 4.36 (dd, *J* = 14.6, 8.2 Hz, 1H), 3.82 (s, 3H), 3.60 (s, 3H), 3.26 (dd, *J* = 14.5, 6.1 Hz, 1H), 3.08 (dd, *J* = 14.5, 8.2 Hz, 1H), 1.28 (s, 9H), 1.01 – 0.95 (m, 9H), 0.95 – 0.91 (m, 6H);

**<sup>13</sup>C NMR:** (126 MHz, CD<sub>3</sub>CN) δ 174.0, 156.1, 154.7, 135.2, 134.1, 130.0, 120.5, 113.3, 112.6, 101.1, 79.8, 56.3, 56.2, 52.6, 29.8, 28.4, 7.7, 4.2;

**FTIR:** (NaCl, thin film): cm<sup>-1</sup>; 3379, 2953, 2874, 1700, 1620, 1506, 1437, 1391, 1366, 1218, 1164;

[α]<sub>D</sub><sup>25</sup> = +6.3 (*c* = 3.75, CHCl<sub>3</sub>);

**HRMS:** (MM) calc'd [M-C<sub>4</sub>H<sub>9</sub>]<sup>+</sup> 407.1997, found 407.1994.

### Tryptophan 3e

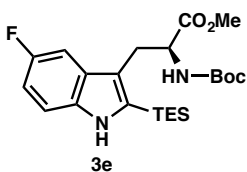

Prepared following *General Procedure I* (36 h). The crude residue was purified by silica gel chromatography (88% hexanes, 12% EtOAc) to afford **3e** as a colorless oil (97.2 mg, 0.216 mmol, 72% yield).

**<sup>1</sup>H NMR:** (500 MHz, CDCl<sub>3</sub>, Major Rotamer) δ 8.01 (s, 1H), 7.26 – 7.22 (m, 1H), 7.21 – 7.14 (m,

1H), 6.91 (ddd,  $J = 8.9, 8.9, 2.2$  Hz, 1H), 4.93 (d,  $J = 8.2$  Hz, 1H), 4.53 (dd,  $J = 14.7, 7.0$  Hz, 1H), 3.65 (s, 3H), 3.30 – 3.14 (m, 2H), 1.35 (s, 9H), 1.05 – 0.97 (m, 9H), 0.96 – 0.88 (m, 6H);

$^{13}\text{C}$  NMR: (126 MHz,  $\text{CDCl}_3$ )  $\delta$  173.2, 157.7 (d,  $J_{\text{C-F}} = 234.9$  Hz), 155.0, 135.1 (d,  $J_{\text{C-F}} = 13.4$  Hz), 129.0 (d,  $J_{\text{C-F}} = 9.2$  Hz), 119.6 (d,  $J_{\text{C-F}} = 4.7$  Hz), 111.3 (d,  $J_{\text{C-F}} = 9.8$  Hz), 110.8 (d,  $J_{\text{C-F}} = 26.5$  Hz), 103.6 (d,  $J_{\text{C-F}} = 23.6$  Hz), 79.7, 54.2, 52.3, 29.5, 28.2, 7.4, 3.6;

FTIR: (NaCl, thin film):  $\text{cm}^{-1}$ ; 3372, 2956, 2875, 1734, 1718, 1700, 1502, 1437, 1367, 1166, 1073, 1010;

$[\alpha]_{\text{D}}^{25} = +3.6$  ( $c = 2.0$ ,  $\text{CHCl}_3$ );

HRMS: (MM) calc'd  $[\text{M}+\text{H}]^+$  395.1797, found 395.1804.

### Tryptophan 3f

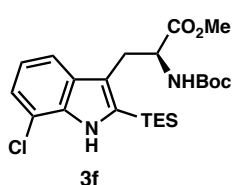

Prepared following *General Procedure I* (36 h). The crude residue was purified by silica gel chromatography (80% hexanes, 20% acetone) to afford **3f** as a colorless oil (114.3 mg, 0.245 mmol, 82% yield).

$^1\text{H}$  NMR: (500 MHz,  $\text{CD}_3\text{CN}$ , Major Rotamer)  $\delta$  8.87 (s, 1H), 7.50 (d,  $J = 8.0$  Hz, 1H), 7.17 (dd,  $J = 7.5, 0.8$  Hz, 1H), 7.04 – 7.01 (m, 1H), 5.50 (d,  $J = 8.1$  Hz, 1H), 4.37 (dd,  $J = 15.1, 7.9$  Hz, 1H), 3.56 (s, 3H), 3.29 (dd,  $J = 14.5, 6.5$  Hz, 1H), 3.12 (dd,  $J = 14.5, 8.0$  Hz, 1H), 1.29 (s, 9H), 1.02 – 0.96 (m, 15H);

$^{13}\text{C}$  NMR: (126 MHz,  $\text{CD}_3\text{CN}$ )  $\delta$  173.7, 156.1, 136.6, 135.3, 131.5, 122.6, 122.4, 120.8, 118.6, 116.9, 79.9, 56.2, 52.6, 29.7, 28.4, 7.7, 4.2;

FTIR: (NaCl, thin film):  $\text{cm}^{-1}$ ; 3380, 2954, 2875, 1734, 1718, 1507, 1499, 1366, 1164;

$[\alpha]_{\text{D}}^{25} = +6.9$  ( $c = 0.87$ ,  $\text{CHCl}_3$ );

HRMS: (MM) calc'd  $[\text{M}+\text{H}]^+$  411.1501, found 411.1504.

### Tryptophan 3g

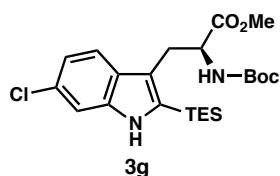

Prepared following *General Procedure I* (36 h). The crude residue was purified by silica gel chromatography (88% hexanes, 12% EtOAc) to afford **3g** as a colorless oil (103.9 mg, 0.222 mmol, 74% yield).

$^1\text{H}$  NMR: (500 MHz,  $\text{CDCl}_3$ , Major Rotamer)  $\delta$  7.98 (s, 1H), 7.46 (d,  $J = 8.5$  Hz, 1H), 7.33 (s, 1H), 7.04 (d,  $J = 8.5$  Hz, 1H), 4.92 (d,  $J = 8.1$  Hz, 1H), 4.55 (dd,  $J = 14.7, 7.1$  Hz, 1H), 3.61 (s, 3H), 3.22 (d,  $J = 6.6$  Hz, 2H), 1.35 (s, 9H), 1.04 – 0.97 (m, 9H), 0.94 – 0.88 (m, 6H);

$^{13}\text{C}$  NMR: (126 MHz,  $\text{CDCl}_3$ )  $\delta$  173.2, 155.0, 138.8, 133.9, 128.4, 127.3, 120.1, 119.7, 110.7, 79.8, 54.2, 52.3, 29.5, 28.2, 7.4, 3.6;

FTIR: (NaCl, thin film):  $\text{cm}^{-1}$ ; 3369, 2954, 2875, 1738, 1699, 1505, 1439, 1392, 1367, 1338, 1163, 1062;

$[\alpha]_{\text{D}}^{25} = +7.1$  ( $c = 1.63$ ,  $\text{CHCl}_3$ );

HRMS: (MM) calc'd  $[\text{M}+\text{H}]^+$  467.2127, found 467.2129.

### Tryptophan 3h

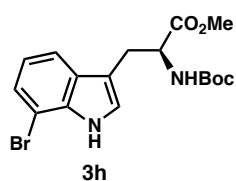

Prepared following *General Procedure III* (36 h). The crude residue was purified by silica gel chromatography (80% hexanes, 20% acetone) to afford **3h** as a colorless oil (61.2 mg, 0.245 mmol, 52% yield).

**<sup>1</sup>H NMR:** (500 MHz, CD<sub>3</sub>CN, Major Rotamer) δ 9.33 (s, 1H), 7.54 (d, *J* = 7.9 Hz, 1H), 7.34 (d, *J* = 7.2 Hz, 1H), 7.17 (d, *J* = 1.7 Hz, 1H), 7.00 (dd, *J* = 7.8, 7.8 Hz, 1H), 5.51 (d, *J* = 7.4 Hz, 1H), 4.43 (dd, *J* = 13.5, 7.6 Hz, 1H), 3.64 (s, 3H), 3.23 (dd, *J* = 14.7, 5.4 Hz, 1H), 3.10 (dd, *J* = 14.7, 7.7 Hz, 1H), 1.35 (s, 9H);

**<sup>13</sup>C NMR:** (126 MHz, CD<sub>3</sub>CN) δ 173.5, 156.2, 135.6, 130.0, 125.5, 125.0, 121.3, 118.9, 112.5, 105.2, 79.9, 55.3, 52.7, 28.4, 28.3;

**FTIR:** (NaCl, thin film): cm<sup>-1</sup>; 3365, 2968, 1738, 1696, 1501, 1434, 1365, 1335;

[α]<sub>D</sub><sup>25</sup> = +44.0 (*c* = 0.385, CHCl<sub>3</sub>);

**HRMS:** (MM) calc'd [M-C<sub>5</sub>H<sub>10</sub>O<sub>2</sub>]<sup>+</sup> 297.0233, found 297.0229.

### Tryptophan 3i

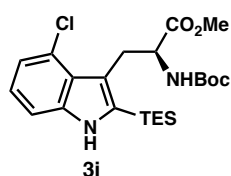

Prepared following *General Procedure II* (12 h, 80 °C). The crude residue was purified by silica gel chromatography (88% hexanes, 12% EtOAc) to afford **3i** as a white, amorphous solid (113.7 mg, 0.243 mmol, 82% yield).

**<sup>1</sup>H NMR:** (500 MHz, CD<sub>3</sub>CN, Major Rotamer) δ 9.29 (s, 1H), 7.38 (dd, *J* = 7.8, 0.9 Hz, 1H), 7.06 (t, *J* = 7.7 Hz, 1H), 7.02 (dd, *J* = 7.5, 1.2 Hz, 1H), 5.41 (d, *J* = 7.7 Hz, 1H), 4.53 (dd, *J* = 15.2, 8.8 Hz, 1H), 3.61 (s, 3H), 3.55 (dd, *J* = 14.3, 5.7 Hz, 1H), 3.28 – 3.17 (m, 1H), 1.23 (s, 9H), 1.02 – 0.89 (m, 15H);

**<sup>13</sup>C NMR:** (126 MHz, CD<sub>3</sub>CN) δ 173.8, 156.1, 141.7, 136.0, 125.8, 125.7, 123.5, 121.1, 120.4, 111.4, 79.8, 57.2, 52.5, 29.8, 28.3, 7.7, 4.2;

**FTIR:** (NaCl, thin film): cm<sup>-1</sup>; 3369, 2954, 2934, 2875, 1721, 1700, 1499, 1456, 1436, 1366, 1167;

[α]<sub>D</sub><sup>25</sup> = -9.0 (*c* = 4.1, CHCl<sub>3</sub>);

**HRMS:** (MM) calc'd [M-C<sub>4</sub>H<sub>9</sub>]<sup>+</sup> 411.1501, found 411.1505.

### Tryptophan 3j

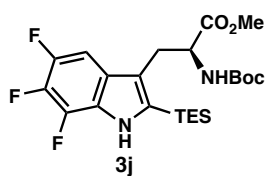

Prepared following *General Procedure I* (36 h). The crude residue was purified by silica gel chromatography (88% hexanes, 12% EtOAc) to afford **3j** as a colorless oil (109.1 mg, 0.188 mmol, 72% yield).

**<sup>1</sup>H NMR:** (500 MHz, CD<sub>3</sub>CN, Major Rotamer) δ 9.36 (s, 1H), 7.25 (dd, *J* = 10.0, 7.1 Hz, 1H), 5.58 (d, *J* = 8.4 Hz, 1H), 4.32 (dd, *J* = 14.7, 8.5 Hz, 1H), 3.59 (s, 3H), 3.24 (dd, *J* = 14.7, 6.0 Hz, 1H), 3.04 (dd, *J* = 14.6, 8.7 Hz, 1H), 1.27 (s, 9H), 1.03 – 0.90 (m, 15H);

**<sup>13</sup>C NMR:** (126 MHz, CD<sub>3</sub>CN) δ 173.5, 156.0, 147.0 (dd,  $J_{C-F}$  = 236.4, 11.9 Hz), 139.5 – 137.1 (m), 137.4 (d,  $J_{C-F}$  = 3.6 Hz), 136.2 (ddd,  $J_{C-F}$  = 239.4, 18.9, 12.5 Hz), 125.8 (dd,  $J_{C-F}$  = 9.1, 5.4 Hz), 124.3 (dd,  $J_{C-F}$  = 10.4, 2.1 Hz), 122.5 – 122.1 (m), 101.1 (d,  $J_{C-F}$  = 19.1 Hz), 79.9, 56.2, 52.7, 29.4, 28.3, 7.6, 4.0;

**FTIR:** (NaCl, thin film): cm<sup>-1</sup>; 3351, 2956, 2876, 1700, 1514, 1467, 1436, 1367, 1350, 1165;

**[α]<sub>D</sub><sup>25</sup>** = +4.2 ( $c$  = 0.65, CHCl<sub>3</sub>);

**LRMS:** (ESI) calc'd [M-C<sub>4</sub>H<sub>9</sub>]<sup>+</sup> 431.5, found 431.2.

### Tryptophan 3k

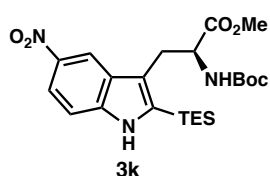

Prepared following *General Procedure I* (36 h). The crude residue was purified by silica gel chromatography (85% hexanes, 15% EtOAc) to afford **3k** as a yellow oil (105.0 mg, 0.219 mmol, 73% yield).

**<sup>1</sup>H NMR:** (500 MHz, CD<sub>3</sub>CN, Major Rotamer) δ 9.66 (s, 1H), 8.30 (d,  $J$  = 2.0 Hz, 1H), 7.91 (dd,  $J$  = 8.9, 2.1 Hz, 1H), 7.66 (d,  $J$  = 8.9 Hz, 1H), 5.59 (d,  $J$  = 8.4 Hz, 1H), 4.37 (dd,  $J$  = 15.0, 8.3 Hz, 1H), 3.57 (s, 3H), 3.32 (dd,  $J$  = 14.6, 6.3 Hz, 1H), 3.15 (dd,  $J$  = 14.6, 8.4 Hz, 1H), 1.26 (s, 9H), 1.05 – 0.92 (m, 15H);

**<sup>13</sup>C NMR:** (126 MHz, CD<sub>3</sub>CN) δ 173.5, 144.0, 142.1, 138.1, 134.1, 121.9, 119.8, 114.9, 108.6, 79.9, 56.3, 52.7, 29.6, 28.3, 7.6, 4.0;

**FTIR:** (NaCl, thin film): cm<sup>-1</sup>; 3380, 2968, 2873, 1736, 1716, 1696, 1508, 1330, 1162, 1065, 1004;

**[α]<sub>D</sub><sup>25</sup>** = +7.9 ( $c$  = 0.75, CHCl<sub>3</sub>);

**LRMS:** (ESI) calc'd [M+H]<sup>+</sup> 478.3, found 478.3.

### Tryptophan 3l

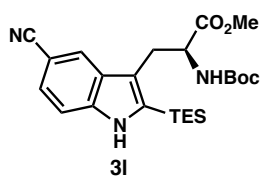

Prepared following *General Procedure I* (36 h). The crude residue was purified by silica gel chromatography (80% hexanes, 20% EtOAc) to afford **3l** as a white, amorphous solid (109.0 mg, 0.238 mmol, 79% yield).

**<sup>1</sup>H NMR:** (500 MHz, CD<sub>3</sub>CN, Major Rotamer) δ 9.48 (s, 1H), 8.03 (s, 1H), 7.51 (d,  $J$  = 8.5 Hz, 1H), 7.38 (dd,  $J$  = 8.5, 1.5 Hz, 1H), 5.66 (d,  $J$  = 8.8 Hz, 1H), 4.35 (td,  $J$  = 9.0, 5.5 Hz, 1H), 3.62 (s, 3H), 3.31 (dd,  $J$  = 14.6, 5.4 Hz, 1H), 3.10 (dd,  $J$  = 14.6, 9.2 Hz, 1H), 1.23 (s, 9H), 1.00 – 0.93 (m, 15H);

**<sup>13</sup>C NMR:** (126 MHz, CD<sub>3</sub>CN) δ 173.5, 155.9, 141.4, 136.8, 129.6, 126.0, 125.3, 122.3, 121.8, 113.0, 102.4, 79.8, 56.5, 52.7, 29.6, 28.3, 7.6, 4.0;

**FTIR:** (NaCl, thin film): cm<sup>-1</sup>; 3350, 2953, 2878, 2218, 1728, 1696, 1508, 1370, 1167;

**[α]<sub>D</sub><sup>25</sup>** = -2.3 ( $c$  = 2.2, CHCl<sub>3</sub>);

**HRMS:** (MM) calc'd [M+H]<sup>+</sup> 458.2470, found 458.2454.



### Tryptophan 3m

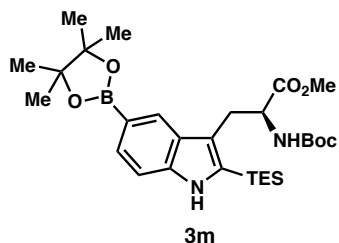

Prepared following *General Procedure I* (36 h). The crude residue was purified by silica gel chromatography (85% hexanes, 15% EtOAc – 80% hexanes, 20% EtOAc) to afford **3m** as a white, amorphous solid (127.0 mg, 0.227 mmol, 76% yield).

**<sup>1</sup>H NMR:** (500 MHz, CDCl<sub>3</sub>, Major Rotamer) δ 8.10 – 7.98 (m, 2H), 7.61 (d, *J* = 8.2 Hz, 1H), 7.33 (d, *J* = 8.2 Hz, 1H), 4.90 (d, *J* = 8.1 Hz, 1H), 4.56 (dd, *J* = 14.4, 6.7 Hz, 1H), 3.75 (s, 3H), 3.31 (qd, *J* = 14.5, 6.5 Hz, 2H), 1.36 (d, *J* = 2.8 Hz, 12H), 1.32 (s, 9H), 1.03 –

0.97 (m, 9H), 0.96 – 0.90 (m, 6H);

**<sup>13</sup>C NMR:** (126 MHz, CDCl<sub>3</sub>) δ 173.1, 155.2, 140.5, 133.1, 128.6, 128.4, 126.7, 120.1, 110.2, 83.4, 79.5, 54.0, 52.3, 28.8, 28.2, 24.9, 7.4, 3.7 (carbon adjacent to boron was not observed);

**FTIR:** (NaCl, thin film): cm<sup>-1</sup>; 3379, 2976, 2874, 1741, 1700, 1499, 1351, 1146;

[α]<sub>D</sub><sup>25</sup> = +15.0 (*c* = 1.0, CHCl<sub>3</sub>);

**HRMS:** (MM) calc'd [M+H]<sup>+</sup> 558.3406, found 558.3388.

### Tryptophan 3n

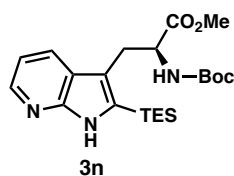

Prepared following *General Procedure I* (12 h). The crude residue was purified by silica gel chromatography (98% dichloromethane, 2% methanol) to afford **3n** as a light yellow oil (111.2 mg, 0.256 mmol, 85% yield).

**<sup>1</sup>H NMR:** (500 MHz, CDCl<sub>3</sub>, Major Rotamer) δ 9.76 (d, *J* = 14.4 Hz, 1H), 8.28 (d, *J* = 3.8 Hz, 1H),

7.90 (d, *J* = 7.7 Hz, 1H), 7.03 (dd, *J* = 7.7, 4.8 Hz, 1H), 5.14 (d, *J* = 8.4 Hz, 1H), 4.59 (dd, *J* = 15.0, 7.1 Hz, 1H), 3.59 (s, 3H), 3.25 (d, *J* = 6.8 Hz, 2H), 1.33 (s, 9H), 1.02 – 0.88 (m, 15H);

**<sup>13</sup>C NMR:** (126 MHz, CDCl<sub>3</sub>) δ 173.3, 155.0, 150.8, 143.3, 134.0, 127.3, 120.9, 118.0, 115.2, 79.7, 54.2, 52.2, 29.8, 28.1, 7.3, 3.6;

**FTIR:** (NaCl, thin film): cm<sup>-1</sup>; 3380, 3226, 2953, 1743, 1691, 1582, 1496, 1439, 1367, 1283, 1172;

[α]<sub>D</sub><sup>25</sup> = +8.7 (*c* = 2.5, CHCl<sub>3</sub>);

**HRMS:** (MM) calc'd [M+H]<sup>+</sup> 434.2470, found 434.2490.

### Tryptophan 3p

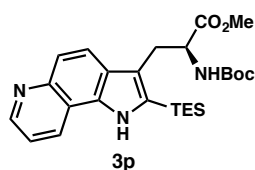

Prepared following *General Procedure I* (36 h). The crude residue was purified by silica gel chromatography (98% dichloromethane, 2% methanol) to afford **3p** as a light yellow oil (119.5 mg, 0.249 mmol, 83% yield).

**<sup>1</sup>H NMR:** (500 MHz, CD<sub>3</sub>CN, Major Rotamer) δ 9.78 (s, 1H), 8.78 (dd, *J* = 4.3, 1.7 Hz, 1H), 8.76

(ddd,  $J = 8.3, 1.5, 0.7$  Hz, 1H), 7.86 (d,  $J = 8.9$  Hz, 1H), 7.63 (dd,  $J = 8.9, 0.8$  Hz, 1H), 7.47 (dd,  $J = 8.3, 4.3$  Hz, 1H), 5.60 (d,  $J = 8.3$  Hz, 1H), 4.40 (dd,  $J = 15.0, 7.8$  Hz, 1H), 3.57 (s, 3H), 3.37 (dd,  $J = 14.5, 6.6$  Hz, 1H), 3.22 (dd,  $J = 14.5, 8.0$  Hz, 1H), 1.26 (s, 9H), 1.01 (s, 15H);

$^{13}\text{C}$  NMR: (126 MHz,  $\text{CD}_3\text{CN}$ )  $\delta$  173.8, 156.1, 148.6, 147.4, 133.9, 133.3, 130.0, 125.6, 123.3, 123.1, 122.0, 121.2, 117.8, 79.9, 56.6, 52.7, 29.5, 28.3, 7.8, 4.4;

FTIR: (NaCl, thin film):  $\text{cm}^{-1}$ ; 3350, 2953, 2873, 1734, 1717, 1700, 1696, 1570, 1496, 1377, 1164;

$[\alpha]_{\text{D}}^{25} = +8.7$  ( $c = 1.2$ ,  $\text{CHCl}_3$ );

HRMS: (MM) calc'd  $[\text{M}+\text{H}]^+$  484.2626, found 484.2621.

### Tryptophan 3q

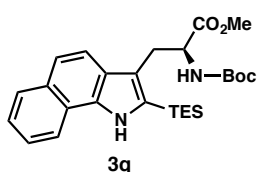

Prepared following *General Procedure I* (36 h). The crude residue was purified by silica gel chromatography (88% hexanes, 12% EtOAc) to afford **3q** as a colorless foam (103.2 mg, 0.213 mmol, 71% yield).

$^1\text{H}$  NMR: (500 MHz,  $\text{CDCl}_3$ , Major Rotamer)  $\delta$  8.67 (s, 1H), 8.05 (d,  $J = 8.1$  Hz, 1H), 7.92 (d,  $J = 8.0$  Hz, 1H), 7.64 (d,  $J = 8.7$  Hz, 1H), 7.53 (ddd,  $J = 8.2, 6.9, 1.3$  Hz, 1H), 7.49 (d,  $J = 8.7$  Hz, 1H), 7.44 (ddd,  $J = 8.1, 7.0, 1.1$  Hz, 1H), 4.97 (d,  $J = 7.9$  Hz, 1H), 4.61 (*app* q,  $J = 7.1$  Hz, 1H), 3.62 (s, 3H), 3.34 (d,  $J = 6.8$  Hz, 2H), 1.35 (s, 9H), 1.08 – 1.02 (m, 9H), 1.02 – 0.97 (m, 6H);

$^{13}\text{C}$  NMR: (126 MHz,  $\text{CDCl}_3$ )  $\delta$  173.3, 155.1, 133.6, 130.7, 130.6, 128.8, 125.4, 124.6, 124.2, 121.4, 121.3, 120.4, 119.4, 118.9, 79.7, 54.4, 52.2, 28.2, 24.7, 7.5, 3.8;

FTIR: (NaCl, thin film):  $\text{cm}^{-1}$ ; 3409, 3350, 2953, 2868, 1743, 1694, 1501, 1392, 1362, 1165;

$[\alpha]_{\text{D}}^{25} = +54.8$  ( $c = 0.97$ ,  $\text{CHCl}_3$ );

HRMS: (MM) calc'd  $[\text{M}-\text{C}_4\text{H}_9]^+$  427.2048, found 427.2066.

### Tryptophan 3r

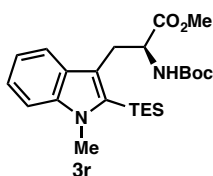

Prepared following *General Procedure I* (36 h). The crude residue was purified by silica gel chromatography (88% hexanes, 12% EtOAc) to afford **3r** as a colorless oil (70.1 mg, 0.156 mmol, 52% yield).

$^1\text{H}$  NMR: (500 MHz,  $\text{CD}_3\text{CN}$ , Major Rotamer)  $\delta$  7.51 (d,  $J = 8.0$  Hz, 1H), 7.35 (d,  $J = 8.3$  Hz, 1H), 7.20 (ddd,  $J = 8.2, 6.9, 1.1$  Hz, 1H), 7.04 (ddd,  $J = 7.9, 7.0, 0.9$  Hz, 1H), 5.41 (d,  $J = 7.3$  Hz, 1H), 4.33 (dd,  $J = 15.1, 7.5$  Hz, 1H), 3.83 (s, 3H), 3.52 (s, 3H), 3.33 (dd,  $J = 14.6, 7.1$  Hz, 1H), 3.18 (dd,  $J = 14.5, 7.4$  Hz, 1H), 1.31 (s, 9H), 1.03 – 0.95 (m, 15H);

$^{13}\text{C}$  NMR: (126 MHz,  $\text{CD}_3\text{CN}$ )  $\delta$  173.9, 156.1, 141.0, 135.5, 129.6, 123.1, 121.8, 119.6, 119.5, 110.2, 79.9, 56.4, 52.5, 33.8, 28.9, 28.4, 7.9, 5.2;

FTIR: (NaCl, thin film):  $\text{cm}^{-1}$ ; 3350, 2956, 2876, 1700, 1516, 1465, 1367, 1165;

$[\alpha]_D^{25} = +4.9$  ( $c = 0.34$ ,  $\text{CHCl}_3$ );

**HRMS:** (MM) calc'd  $[\text{M}-\text{C}_4\text{H}_6]^+$  391.2048, found 391.2034.

### Tryptophan 3s

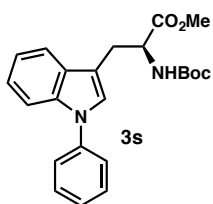

Prepared following *General Procedure III* (12 h). The crude residue was purified by silica gel chromatography (20% acetone, 80% hexanes) to afford **3s** as a colorless oil (80.2 mg, 0.203 mmol, 68% yield).

**$^1\text{H NMR}$ :** (500 MHz,  $\text{CD}_3\text{CN}$ , Major Rotamer)  $\delta$  7.63 (d,  $J = 7.8$  Hz, 1H), 7.58 – 7.50 (m, 5H), 7.41 – 7.35 (m, 1H), 7.31 (s, 1H), 7.22 (ddd,  $J = 8.3, 7.0, 1.3$  Hz, 1H), 7.17 (ddd,  $J = 8.0, 7.0, 1.1$  Hz, 1H), 5.58 (d,  $J = 7.8$  Hz, 1H), 4.51 (dd,  $J = 13.5, 7.7$  Hz, 1H), 3.67 (s, 3H), 3.31 (dd,  $J = 14.7, 5.4$  Hz, 1H), 3.18 (dd,  $J = 14.7, 7.6$  Hz, 1H), 1.35 (s, 9H);

**$^{13}\text{C NMR}$ :** (126 MHz,  $\text{CD}_3\text{CN}$ )  $\delta$  173.6, 156.3, 140.4, 136.7, 130.7, 130.0, 127.8, 127.3, 124.8, 123.5, 121.1, 120.0, 113.0, 111.4, 79.9, 55.2, 52.7, 28.4;

**FTIR:** (NaCl, thin film):  $\text{cm}^{-1}$ ; 3380, 2966, 2930, 1741, 1714, 1501, 1455, 1367;

$[\alpha]_D^{25} = +32.1$  ( $c = 1.86$ ,  $\text{CHCl}_3$ );

**HRMS:** (MM) calc'd  $[\text{M}-\text{C}_4\text{H}_9]^+$  339.1339, found 339.1326.

### Tryptophan 3t

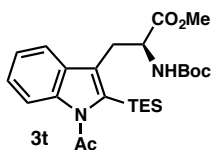

Prepared following *General Procedure I* (36 h). The crude residue was purified by silica gel chromatography (86% hexanes, 14% EtOAc) to afford **3t** as a colorless oil (107.0 mg, 0.226 mmol, 75% yield).

**$^1\text{H NMR}$ :** (500 MHz,  $\text{CD}_3\text{CN}$ , Major Rotamer)  $\delta$  7.75 (d,  $J = 8.4$  Hz, 1H), 7.61 (d,  $J = 7.8$  Hz, 1H), 7.35 (ddd,  $J = 8.5, 7.2, 1.3$  Hz, 1H), 7.27 (ddd,  $J = 7.6, 7.6, 0.8$  Hz, 1H), 5.57 (d,  $J = 8.3$  Hz, 1H), 4.40 (dd,  $J = 15.2, 8.0$  Hz, 1H), 3.54 (s, 3H), 3.37 (dd,  $J = 14.4, 6.7$  Hz, 1H), 3.20 (dd,  $J = 14.3, 8.2$  Hz, 1H), 2.78 (s, 3H), 1.30 (s, 9H), 1.00 – 0.89 (m, 15H);

**$^{13}\text{C NMR}$ :** (126 MHz,  $\text{CD}_3\text{CN}$ )  $\delta$  173.4, 171.0, 156.1, 138.0, 137.1, 133.7, 131.2, 125.9, 123.4, 120.4, 115.2, 80.0, 55.9, 52.7, 28.8, 28.4, 27.0, 8.6, 6.8;

**FTIR:** (NaCl, thin film):  $\text{cm}^{-1}$ ; 3373, 2953, 2874, 1746, 1700, 1499, 1435, 1369, 1321, 1223, 1167, 1109;

$[\alpha]_D^{25} = +5.0$  ( $c = 0.69$ ,  $\text{CHCl}_3$ );

**HRMS:** (MM) calc'd  $[\text{M}-\text{C}_4\text{H}_9]^+$  419.1997, found 419.1986.

### Tryptophan 3u

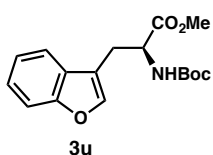

Prepared following *General Procedure III* (24 h). The crude residue was purified by silica gel chromatography (25% acetone, 75% hexanes) to afford **3u** as a colorless oil (68.9 mg, 0.216 mmol, 72% yield).

**<sup>1</sup>H NMR:** (500 MHz, CD<sub>3</sub>CN, Major Rotamer) δ 7.60 (d, *J* = 7.2 Hz, 1H), 7.58 (s, 1H), 7.49 (d, *J* = 8.1 Hz, 1H), 7.32 (ddd, *J* = 8.3, 7.3, 1.4 Hz, 1H), 7.27 (td, *J* = 7.5, 1.0 Hz, 1H), 5.63 (d, *J* = 6.5 Hz, 1H), 4.48 (dd, *J* = 13.5, 7.9 Hz, 1H), 3.67 (s, 3H), 3.20 (dd, *J* = 14.8, 5.3 Hz, 1H), 3.07 (dd, *J* = 14.8, 8.0 Hz, 1H), 1.35 (s, 9H);

**<sup>13</sup>C NMR:** (126 MHz, CD<sub>3</sub>CN) δ 173.2, 156.0, 144.1, 128.8, 125.4, 123.6, 120.7, 116.7, 112.2, 80.0, 54.5, 52.8, 28.4, 26.6;

**FTIR:** (NaCl, thin film): cm<sup>-1</sup>; 3375, 2977, 2925, 1744, 1716, 1690, 1505, 1455, 1367, 1165;

[α]<sub>D</sub><sup>25</sup> = +16.8 (*c* = 0.64, CHCl<sub>3</sub>);

**LRMS:** (ESI) calc'd [M-C<sub>4</sub>H<sub>9</sub>]<sup>+</sup> 263.2, found 263.2.

### Tryptophan 5a

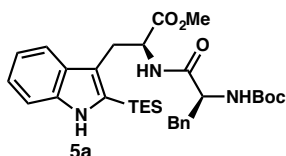

Prepared following *General Procedure I* (36 h). The crude residue was purified by silica gel chromatography (80% hexanes, 20% acetone) to afford **5a** as a colorless oil (109.1 mg, 0.188 mmol, 63% yield).

**<sup>1</sup>H NMR:** (500 MHz, CD<sub>3</sub>CN, Major Rotamer) δ 9.12 (s, 1H), 7.59 (dd, *J* = 7.9, 0.8 Hz, 1H), 7.39 (d, *J* = 8.1 Hz, 1H), 7.29 – 7.19 (m, 3H), 7.16 – 7.05 (m, 3H), 7.04 (ddd, *J* = 9.0, 5.6, 1.8 Hz, 1H), 5.44 (d, *J* = 6.4 Hz, 1H), 4.62 (dd, *J* = 13.1, 6.8 Hz, 1H), 4.24 (ddd, *J* = 8.4, 8.4, 5.7 Hz, 1H), 3.48 (s, 3H), 3.24 (dd, *J* = 14.4, 7.8 Hz, 1H), 3.10 (dd, *J* = 14.4, 7.9 Hz, 1H), 2.85 (dd, *J* = 13.9, 5.4 Hz, 1H), 2.62 (dd, *J* = 13.9, 8.5 Hz, 1H), 1.33 (s, 9H), 1.03 – 0.88 (m, 15H);

**<sup>13</sup>C NMR:** (126 MHz, CD<sub>3</sub>CN) δ 173.1, 172.1, 156.2, 139.8, 138.3, 133.3, 130.2, 129.7, 129.1, 127.4, 122.8, 120.4, 119.8, 119.4, 112.0, 79.9, 56.2, 55.4, 52.6, 38.4, 29.7, 28.4, 7.7, 4.2;

**FTIR:** (NaCl, thin film): cm<sup>-1</sup>; 3380, 2948, 2878, 1736, 1666, 1506, 1367, 1244, 1165;

[α]<sub>D</sub><sup>25</sup> = -4.2 (*c* = 1.6, CHCl<sub>3</sub>);

**HRMS:** (MM) calc'd [M+H]<sup>+</sup> 580.3201, found 580.3206.

### Tryptophan 5b

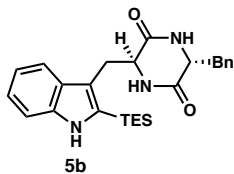

Prepared following *General Procedure I* (72 h). The crude residue was purified by silica gel chromatography (55% hexanes, 40% EtOAc, 5% methanol) to afford **5b** as a colorless oil (95.2 mg, 0.213 mmol, 71% yield).

**<sup>1</sup>H NMR:** (500 MHz, CDCl<sub>3</sub>) δ 8.15 (s, 1H), 7.39 (d, *J* = 8.2 Hz, 1H), 7.36 – 7.32 (m, 2H), 7.29 (ddd, *J* = 6.3, 5.1, 2.1 Hz, 2H), 7.22 (ddd, *J* = 8.1, 7.0, 1.1 Hz, 1H), 7.18 (dd, *J* = 8.0, 1.2 Hz, 2H), 7.10 (ddd, *J* = 7.9, 7.0, 0.9 Hz, 1H), 6.94 (d, *J* = 2.2 Hz, 1H), 5.64 (s, 1H), 4.24 (ddd, *J* = 5.2, 5.2, 2.5 Hz, 1H), 3.59 (dd, *J* = 14.5, 3.8 Hz, 1H), 3.45 (dd, *J* = 11.5, 3.8 Hz, 1H), 3.14 (d, *J* = 5.1 Hz, 2H), 2.87 (dd, *J* = 14.5, 11.5 Hz, 1H), 1.02 – 0.94 (m, 9H), 0.90 – 0.82 (m, 6H);

**<sup>13</sup>C NMR:** (126 MHz, CDCl<sub>3</sub>) δ 168.8, 167.0, 138.7, 134.8, 133.9, 129.9, 128.9, 127.6, 127.6, 122.8, 119.7, 118.7, 118.0, 111.1, 56.6, 53.3, 40.2, 30.0, 7.4, 3.7;

**FTIR:** (NaCl, thin film): cm<sup>-1</sup>; 3356, 3226, 2958, 2864, 1676, 1451, 1437, 1316;

**[α]<sub>D</sub><sup>25</sup>** = +5.6 (*c* = 0.47, CHCl<sub>3</sub>);

**HRMS:** (MM) calc'd [M+H]<sup>+</sup> 448.2415, found 448.2426.

### Tryptophan 5c

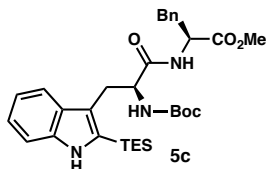

Prepared following *General Procedure I* (36 h). The crude residue was purified by silica gel chromatography (80% hexanes, 20% acetone) to afford **5c** as a colorless oil (108.0 mg, 0.186 mmol, 62% yield).

**<sup>1</sup>H NMR:** (500 MHz, CD<sub>3</sub>CN, Major Rotamer) δ 9.09 (s, 1H), 7.59 (dd, *J* = 7.9, 0.8 Hz, 1H), 7.40 (d, *J* = 8.1 Hz, 1H), 7.29 – 7.19 (m, 3H), 7.16 – 7.05 (m, 3H), 7.05 – 7.01 (m, 1H), 6.69 (d, *J* = 6.1 Hz, 1H), 5.24 (d, *J* = 6.4 Hz, 1H), 4.62 (q, *J* = 6.8 Hz, 1H), 4.23 (dt, *J* = 8.4, 5.7 Hz, 1H), 3.59 (s, 3H), 3.24 (ddd, *J* = 14.4, 6.5, 4.7 Hz, 1H), 3.08 – 2.91 (m, 3H), 1.25 (s, 9H), 1.03 – 0.88 (m, 15H);

**<sup>13</sup>C NMR:** (126 MHz, CD<sub>3</sub>CN) δ 172.5, 172.3, 140.0, 137.5, 133.3, 130.3, 129.5, 129.3, 127.7, 122.9, 120.9, 119.7, 119.7, 112.0, 79.9, 57.1, 54.2, 52.7, 38.2, 29.5, 28.3, 7.7, 4.2;

**FTIR:** (NaCl, thin film): cm<sup>-1</sup>; 3370, 2953, 2878, 1745, 1666, 1508, 1449, 1370, 1241, 1170;

**[α]<sub>D</sub><sup>25</sup>** = +10.0 (*c* = 1.06, CHCl<sub>3</sub>);

**HRMS:** (MM) calc'd [M+H]<sup>+</sup> 580.3201, found 580.3206.

### Tryptophan 5d

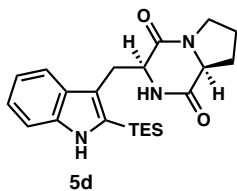

Prepared following *General Procedure I* (72 h). The crude residue was purified by silica gel chromatography (55% hexanes, 40% EtOAc, 5% methanol) to afford **5d** as an amorphous, white solid (98.6 mg, 0.249 mmol, 83% yield).

**<sup>1</sup>H NMR:** (500 MHz, CDCl<sub>3</sub>) δ 8.12 (s, 1H), 7.56 (dd, *J* = 7.9, 0.7 Hz, 1H), 7.40 (ddd, *J* = 8.2, 0.8, 0.8 Hz, 1H), 7.22 (ddd, *J* = 8.2, 7.0, 1.1 Hz, 1H), 7.11 (ddd, *J* = 8.0, 7.0, 0.9 Hz, 1H), 5.59 (s, 1H), 4.42 (dd, *J* = 11.8, 2.4 Hz, 1H), 4.07 (dd, *J* = 11.6, 4.5 Hz, 1H), 3.84 (dd, *J* = 15.0, 3.9 Hz, 1H), 3.75 – 3.66 (m, 1H), 3.65 – 3.54 (m, 1H), 3.00 (dd, *J* = 15.0, 11.8 Hz, 1H), 2.39 – 2.29 (m, 1H), 2.13 – 2.00 (m, 2H), 1.99 – 1.87 (m, 1H), 1.04 – 0.98 (m, 9H), 0.94 – 0.85 (m, 6H);

**<sup>13</sup>C NMR:** (126 MHz, CDCl<sub>3</sub>) δ 169.0, 165.7, 138.8, 133.6, 127.9, 123.0, 119.9, 118.8, 118.3, 111.3, 59.2, 54.8, 45.4, 28.4, 27.5, 22.6, 7.4, 3.8;

**FTIR:** (NaCl, thin film): cm<sup>-1</sup>; 3365, 2953, 2873, 1671, 1456, 1412, 1303, 1239;

**[α]<sub>D</sub><sup>25</sup>** = -34.4 (*c* = 0.82, CHCl<sub>3</sub>);

**HRMS:** (MM) calc'd [M+H]<sup>+</sup> 398.2258, found 398.2272.

### Tryptophan 5e

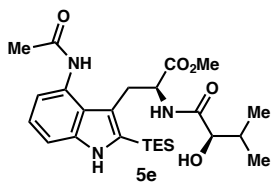

Prepared following *General Procedure II* (0.87 mmol scale, 12 h). The crude residue was purified by silica gel chromatography (100% EtOAc) to afford **5e** as a light yellow oil (370.2 mg, 0.756 mmol, 86% yield).

**<sup>1</sup>H NMR:** (500 MHz, CD<sub>3</sub>CN, Major Rotamer) δ 9.25 (s, 1H), 8.40 (s, 1H), 7.31 (d, *J* = 8.1 Hz, 1H), 7.14 (d, *J* = 5.6 Hz, 1H), 7.08 (t, *J* = 7.8 Hz, 1H), 6.92 (d, *J* = 7.4 Hz, 1H), 4.49 (dt, *J* = 10.3, 6.3 Hz, 1H), 3.61 (s, 3H), 3.62 – 3.58 (m, 1H), 3.55 (d, *J* = 5.9 Hz, 1H), 3.41 (dd, *J* = 14.7, 6.2 Hz, 1H), 3.14 (dd, *J* = 14.7, 10.3 Hz, 1H), 2.16 (s, 3H), 1.88 – 1.76 (m, 1H), 1.07 – 0.94 (m, 15H), 0.82 (d, *J* = 6.9, 3H), 0.66 (d, *J* = 6.8 Hz, 3H);

**<sup>13</sup>C NMR:** (126 MHz, CD<sub>3</sub>CN) δ 174.4, 173.6, 171.5, 141.7, 134.9, 130.2, 124.9, 122.9, 119.4, 118.9, 110.9, 76.3, 52.6, 32.6, 29.5, 29.3, 23.8, 19.4, 15.6, 7.7, 4.3;

**FTIR:** (NaCl, thin film): cm<sup>-1</sup>; 3324, 2956, 2875, 1742, 1657, 1516, 1435, 1369;

**[α]<sub>D</sub><sup>25</sup>** = -1.8 (*c* = 1.3, CHCl<sub>3</sub>);

**HRMS:** (MM) calc'd [M+H]<sup>+</sup> 490.2732, found 490.2772.

## VI. Stability of the Tryptophan Stereocenter

In order to confirm that the tryptophan products were not undergoing deleterious racemization under the reaction conditions, tryptophan **3a** was desilylated with 1 N HCl/MeOH and compared to *racemic* *N*-Boc-tryptophan methyl ester using chiral supercritical fluid chromatography (SFC) (AD-H, 2.5 mL/min, 10% IPA in CO<sub>2</sub>,  $\lambda = 254$  nm):  $t_R(\text{minor}) = 19.6$  min,  $t_R(\text{major}) = 21.2$  min. We observed no racemization of the tryptophan stereocenter under the reaction conditions. Additionally, Larock indole syntheses using dipeptide-derived alkynes to provide tryptohans **5a – 5b** show the formation of a single diastereomer of product by crude <sup>1</sup>H NMR and LCMS, further supporting the stability of the tryptophan stereocenter under Larock conditions. The low optical rotations exhibited by tryptophans **3a – 3u** are consistent with literature values of related compounds.<sup>3,4</sup>

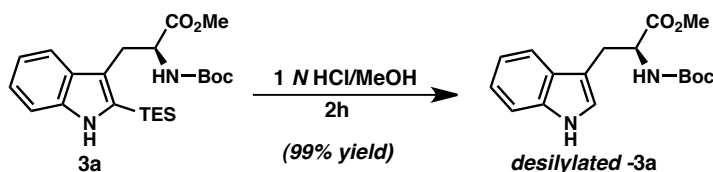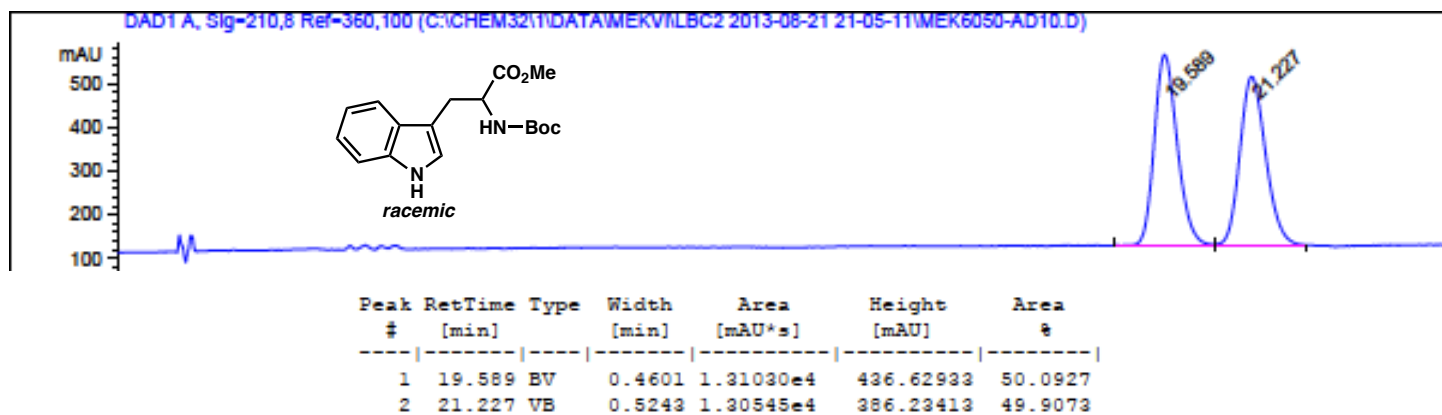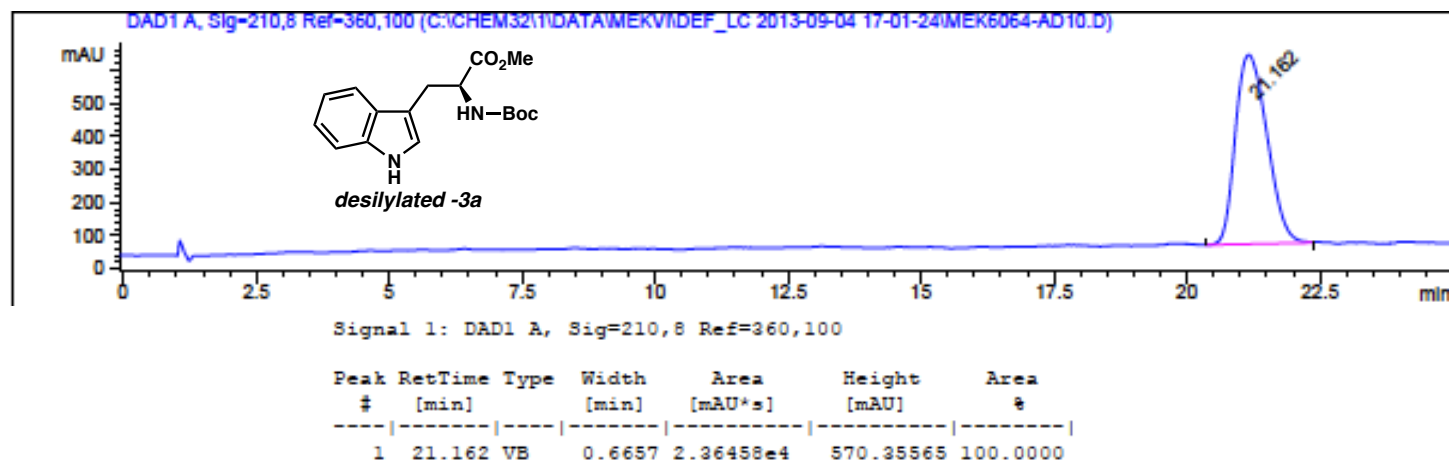

<sup>3</sup> Ma, B.; Banerjee, B.; Litvinov, D. N.; He, L.; Castle, S. L. *J. Am. Chem. Soc.* **2009**, *132*, 1159.

<sup>4</sup> Preciado, S.; Mendive-Tapia, L.; Albericio, F.; Lavilla, R. *J. Org. Chem.* **2013**, *78*, 8129.

## VII. Scale-up and Desilylation of Tryptophan **3o**

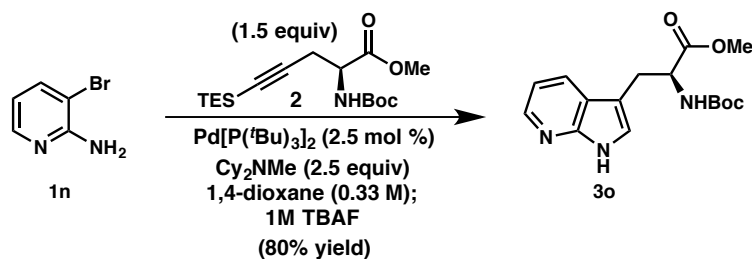

In a glovebox, pyridyl aniline **1n** (865 mg, 5.0 mmol, 1.0 equiv), alkyne **2** (2.56 g, 7.5 mmol, 1.5 equiv), Pd[P(*t*Bu)<sub>3</sub>]<sub>2</sub> (64 mg, 0.125 mmol, 0.025 equiv), and Cy<sub>2</sub>NMe (2.7 mL, 12.5 mmol, 2.5 equiv) were combined in a 50 mL flask. The solids were dissolved in 15 mL 1,4-dioxane and the solution was heated to an internal temperature of 60 °C for 30 h.<sup>5</sup> Upon cooling, the milky yellow solution was filtered through a silica plug, which was washed thoroughly with EtOAc. The solution was concentrated and then redissolved in 50 mL EtOAc and 1 M TBAF in THF (5 mL). After 20 minutes, aqueous NH<sub>4</sub>Cl was added and the reaction mixture was partitioned in a separatory funnel. The aqueous layer was back extracted with EtOAc (3 x 150 mL). The organics were then recombined, washed with brine, dried over Na<sub>2</sub>SO<sub>4</sub>, filtered and concentrated. The crude residue was purified using silica gel chromatography (60% hexanes, 35% EtOAc, 5% methanol) to afford tryptophan **3o** as a light yellow solid (1.28 g, 80% yield).

**<sup>1</sup>H NMR:** (500 MHz, CD<sub>3</sub>CN, Major Rotamer) δ 10.06 (s, 1H), 8.23 (dd, *J* = 4.8, 1.5 Hz, 1H), 7.90 (dd, *J* = 7.9, 1.5 Hz, 1H), 7.20 (s, 1H), 7.06 (dd, *J* = 7.9, 4.7 Hz, 1H), 5.64 (d, *J* = 8.3 Hz, 1H), 4.45 (dd, *J* = 5.4, 7.8 Hz, 1H), 3.64 (s, 3H), 3.23 (dd, *J* = 14.7, 5.4 Hz, 1H), 3.11 (dd, *J* = 14.7, 7.5 Hz, 1H), 1.34 (s, 9H);

**<sup>13</sup>C NMR:** (126 MHz, CD<sub>3</sub>CN) δ 173.6, 156.2, 149.6, 143.8, 127.8, 125.0, 120.7, 116.3, 109.9, 79.9, 55.3, 52.7, 28.4, 28.4;

**FTIR:** (NaCl, thin film): cm<sup>-1</sup>; 3365, 2978, 1743, 1698, 1511, 1434, 1362;

**[α]<sub>D</sub><sup>25</sup>** = 49.1 (*c* = 1.25, CHCl<sub>3</sub>);

**HRMS:** (MM) calc'd [M+H]<sup>+</sup> 320.1605, found 320.1594.

<sup>5</sup> For larger scale preparations (>1.00 mmol) maintaining an *internal* temperature ≥ 60 °C is critical for conversion.



### VIII. Total Synthesis of (-)-Aspergilazine A Preparation of Diarylamine 8

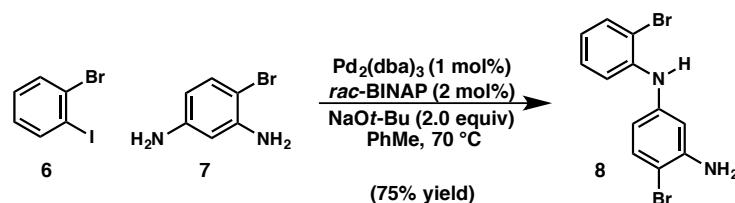

In a glove box, a flame-dried 250 mL flask was charged with iodobromobenzene (**6**) (771  $\mu$ L, 6.0 mmol, 1.0 equiv), dianiline **7** (1.34 g, 7.2 mmol, 1.2 equiv), Pd<sub>2</sub>(dba)<sub>3</sub> (54 mg, 0.06 mmol, 0.01 equiv), *rac*-BINAP (75 mg, 0.12 mmol, 0.02 equiv), and NaO<sup>t</sup>Bu (865 mg, 9.0 mmol, 1.5 equiv). PhMe (60 mL) was added and the reaction flask was sealed and heated to 70 °C for 3.5 hours. Upon cooling, the reaction mixture was filtered through a plug of silica gel, which was flushed with EtOAc. The organics were concentrated and purified by silica gel chromatography (20% acetone, 80% hexanes) to provide the diarylamine **8** as a light yellow oil (1.54 g, 75% yield).

**<sup>1</sup>H NMR:** (500 MHz, CDCl<sub>3</sub>)  $\delta$  7.62 (dd,  $J$  = 8.0, 1.4 Hz, 1H), 7.39 (d,  $J$  = 8.5 Hz, 1H), 7.34 (dd,  $J$  = 8.2, 1.6 Hz, 1H), 7.26 (ddd,  $J$  = 8.2, 7.2, 1.5 Hz, 1H), 6.86 (ddd,  $J$  = 8.0, 7.2, 1.6 Hz, 1H), 6.59 (d,  $J$  = 2.5 Hz, 1H), 6.52 (dd,  $J$  = 8.5, 2.6 Hz, 1H), 6.03 (s, 1H), 4.14 (s, 2H);

**<sup>13</sup>C NMR:** (126 MHz, CDCl<sub>3</sub>)  $\delta$  144.6, 141.9, 140.7, 132.9, 132.8, 128.0, 121.2, 116.6, 112.5, 111.1, 106.3, 101.9;

**FTIR:** (NaCl, thin film): cm<sup>-1</sup>; 3464, 3380, 1612, 1582, 1511, 1459, 1407, 1330, 1303, 1276;

**HRMS:** (MM) calc'd [M+H]<sup>+</sup> 340.9284, found 340.9264.

### Synthesis of Bis-Triethylsilyl(-)-Aspergilazine A

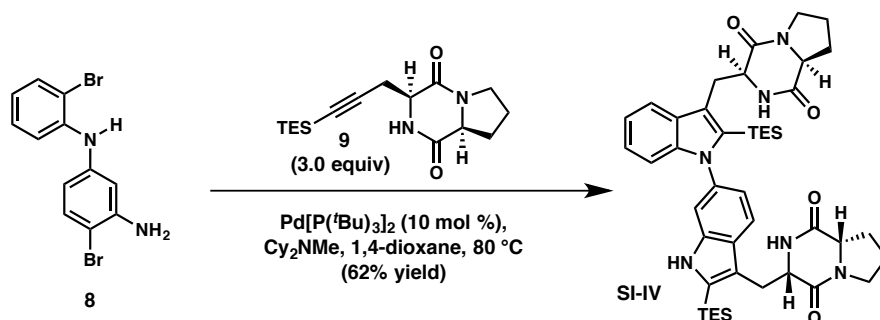

In a glovebox, a one-dram vial was charged with diarylamine **8** (35 mg, 0.1 mmol, 1.0 equiv), alkyne **9**<sup>6</sup> (94 mg, 0.3 mmol, 3.0 equiv), Cy<sub>2</sub>NMe (55  $\mu$ L, 0.25 mmol, 2.5 equiv), Pd[P(<sup>t</sup>Bu)<sub>3</sub>]<sub>2</sub> (5.2 mg, 0.01 mmol, 0.1 equiv) and 1,4-dioxane (500  $\mu$ L). The vial was sealed and heated to 80 °C for 4 hours. Upon cooling, the reaction mixture was filtered

<sup>6</sup> Kieffer, M. E.; Chuang, K. V.; Reisman, S. E. *J. Am. Chem. Soc.* **2013**, *135*, 5557.

through celite, which was washed with EtOAc (15 mL). The organics were concentrated and the crude reaction mixture was purified by preparative reverse phase HPLC (65–85% acetonitrile in H<sub>2</sub>O, 30 mL/min, 20 min) to give the product as a colorless solid (49.5 mg, 62% yield).

**<sup>1</sup>H NMR:** (500 MHz, CD<sub>2</sub>Cl<sub>2</sub>, Major Rotamer) δ 8.41 (d, *J* = 11.0 Hz, 1H), 7.66 (dd, *J* = 8.3, 2.5 Hz, 1H), 7.64 – 7.59 (m, 1H), 7.41 (dd, *J* = 7.6, 1.6 Hz, 1H), 7.17 – 7.05 (m, 3H), 6.97 – 6.89 (m, 1H), 5.65 (s, 1H), 5.50 (s, 1H), 4.55 – 4.46 (m, 1H), 4.47 – 4.41 (m, 1H), 4.15 – 4.04 (m, 2H), 3.91 – 3.80 (m, 2H), 3.71 – 3.61 (m, 2H), 3.60 – 3.53 (m, 2H), 3.11 (ddd, *J* = 14.7, 11.7, 2.9 Hz, 1H), 3.05 (ddd, *J* = 14.9, 11.7, 1.4 Hz, 1H), 2.37 – 2.24 (m, 2H), 2.12 – 1.99 (m, 4H), 1.97 – 1.87 (m, 2H), 1.11 – 1.02 (m, 9H), 1.01 – 0.93 (m, 6H), 0.92 – 0.79 (m, 9H), 0.67 – 0.50 (m, 6H);

Note: The presence of rotameric peaks complicates the analysis of the <sup>13</sup>C NMR spectra for this compound.

**<sup>13</sup>C NMR:** (126 MHz, CD<sub>2</sub>Cl<sub>2</sub>) δ 169.6, 169.6, 166.0, 165.9, 165.8, 143.1, 143.0, 139.3, 139.3, 137.4, 137.3, 136.7, 136.6, 135.8, 135.8, 128.7, 128.5, 128.4, 128.4, 123.5, 123.5, 121.8, 121.7, 121.6, 121.6, 120.3, 120.3, 119.8, 119.7, 119.2, 118.5, 112.5, 112.4, 111.6, 111.6, 59.8, 59.7, 55.9, 55.8, 55.6, 54.9, 45.9, 45.8, 30.2, 29.0, 28.9, 28.2, 27.6, 23.2, 23.2, 23.1, 7.9, 7.9, 7.8, 4.9, 4.8, 4.3.

**<sup>1</sup>H NMR:** (400 MHz, CD<sub>3</sub>CN, 25 °C) δ 9.53 (d, *J* = 6.9 Hz, 1H), 7.70 (dd, *J* = 8.4, 4.3 Hz, 1H), 7.67 – 7.61 (m, 1H), 7.48 (dd, *J* = 12.8, 1.7 Hz, 1H), 7.09 (qd, *J* = 5.9, 4.5, 1.9 Hz, 3H), 6.93 – 6.82 (m, 1H), 5.61 (d, *J* = 11.6 Hz, 1H), 5.50 (d, *J* = 18.5 Hz, 1H), 4.44 (tt, *J* = 10.9, 4.9 Hz, 2H), 4.12 (t, *J* = 7.6 Hz, 2H), 3.86 – 3.70 (m, 2H), 3.64 – 3.52 (m, 2H), 3.46 (dtd, *J* = 10.7, 7.2, 6.6, 3.1 Hz, 2H), 3.13 (ddd, *J* = 15.0, 11.4, 8.5 Hz, 1H), 3.04 (dd, *J* = 14.9, 11.0 Hz, 1H), 2.19 (s, 8H), 2.04 – 1.78 (m, 8H), 0.98 (m, 15H), 0.83 (m, 9H), 0.66 – 0.45 (m, 6H).

The <sup>1</sup>H NMR was found to coalesce in deuterated acetonitrile at 60 °C.

**<sup>1</sup>H NMR:** (400 MHz, CD<sub>3</sub>CN, 60 °C) δ 9.40 (s, 1H), 7.72 (d, *J* = 8.3 Hz, 1H), 7.70 – 7.63 (m, 1H), 7.48 (s, 1H), 7.22 – 7.04 (m, 3H), 6.91 (s, 1H), 5.58 (s, 1H), 5.47 (s, 1H), 4.45 (t, *J* = 11.4 Hz, 2H), 4.13 (t, *J* = 7.7 Hz, 2H), 3.83 (d, *J* = 14.7 Hz, 1H), 3.76 (dd, *J* = 15.0, 4.2 Hz, 1H), 3.70 – 3.57 (m, 2H), 3.48 (ddd, *J* = 11.6, 8.1, 3.8 Hz, 2H), 3.18 (t, *J* = 13.1 Hz, 1H), 3.09 (dd, *J* = 14.9, 10.8 Hz, 1H), 2.29 – 2.16 (m, 2H), 2.02 – 1.81 (m, 6H), 1.23 – 0.94 (m, 15H), 0.88 (t, *J* = 7.7 Hz, 9H), 0.74 – 0.51 (m, 6H).

**FTIR:** (NaCl, thin film): cm<sup>-1</sup>; 3375, 2963, 2859, 1671, 1446, 1414;

[α]<sub>D</sub><sup>25</sup> = -79.5 (*c* = 0.055, 1:1 DCM:MeOH);

**HRMS:** (MM) calc'd [M–SiC<sub>6</sub>H<sub>15</sub>]<sup>+</sup> 679.3423, found 679.3426.

### Synthesis of (-)-Aspergilazine A (10)

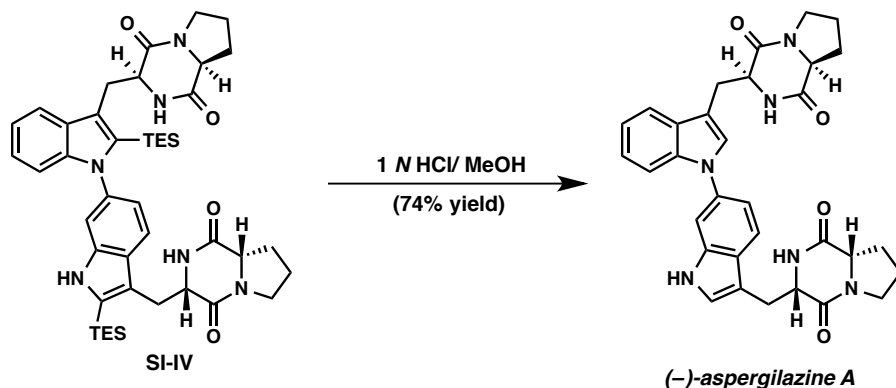

Silylated compound **SI-IV** (49.5 mg, 0.06 mmol, 1.0 equiv) was dissolved in 1 N HCl in MeOH (10 mL) and allowed to stir for 15 minutes. The reaction was quenched by addition of aqueous NaHCO<sub>3</sub> and diluted with EtOAc. The organics were removed *in vacuo* and the aqueous layer was extracted with EtOAc (3 X 20 mL). The organics were combined, dried over Na<sub>2</sub>SO<sub>4</sub>, filtered, and concentrated. The crude residue was purified by silica gel chromatography (5% MeOH, 95% CH<sub>2</sub>Cl<sub>2</sub>) to provide (-)-aspergilazine **A** as a colorless solid (26.0 mg, 74% yield).

Spectroscopic and physical data, including <sup>1</sup>H, <sup>13</sup>C NMR in DMSO-*d*<sub>6</sub>, IR, and MS obtained for (-)-aspergilazine **A** matched that as reported during isolation by Gu et. al<sup>7</sup> and data obtained by Sperry and co-workers.<sup>8</sup> See below <sup>1</sup>H and <sup>13</sup>C NMR data comparison.

The sign of the optical rotation by Gu et. al was subsequently corrected by the authors from (+)- to (-)-aspergilazine **A**.<sup>9</sup> The initially reported rotation of “[α]<sub>D</sub><sup>25</sup> = 72.0” was revised to “[α]<sub>D</sub><sup>25</sup> = -72.0.” Studies toward aspergilazine **A** by Boyd and Sperry<sup>8</sup> confirm the negative sign value (reported rotation, [α]<sub>D</sub><sup>25</sup> = -70.0). The obtained synthetic material in this report was of slightly greater magnitude [α]<sub>D</sub><sup>25</sup> = -90.6 (*c* = 0.625, 1:1 CH<sub>2</sub>Cl<sub>2</sub>:MeOH), but of the same sign.

**<sup>1</sup>H NMR:** (500 MHz, DMSO-*d*<sub>6</sub>) δ 11.05 (s, 1H), 7.99 (s, 1H), 7.87 (s, 1H), 7.74 (d, *J* = 8.4 Hz, 1H), 7.67 (d, *J* = 7.9 Hz, 1H), 7.47 (d, *J* = 8.3 Hz, 1H), 7.46 (s, 1H), 7.44 (d, *J* = 1.9 Hz, 1H), 7.28 (d, *J* = 2.3 Hz, 1H), 7.16 (t, *J* = 7.6 Hz, 1H), 7.14 (dd, *J* = 8.2, 1.7 Hz, 1H), 7.09 (t, *J* = 7.4 Hz, 1H), 4.40 (t, *J* = 4.8 Hz, 1H), 4.36 (t, *J* = 5.2 Hz, 1H), 4.16 – 4.00 (m, 2H), 3.46 – 3.29 (m, 3H), 3.33 – 3.20 (m, 3H), 3.15 (dd, *J* = 14.9, 5.7 Hz, 2H), 2.05 – 1.89 (m, 2H), 1.82 – 1.51 (m, 4H), 1.47 – 1.31 (m, 2H);

<sup>7</sup> Cai, S.; Kong, X.; Wang, W.; Zhou, H.; Zhu, T.; Li, D.; Gu, Q. *Tetrahedron Lett.* **2012**, 53, 2615.

<sup>8</sup> Boyd, E. M.; Sperry, J. *Org. Lett.* **2014**, 16, 5056.

<sup>9</sup> Cai, S.; Kong, X.; Wang, W.; Zhou, H.; Zhu, T.; Li, D.; Gu, Q. *Tetrahedron Lett.* **2014**, 55, 5404.

**<sup>13</sup>C NMR:** (126 MHz, DMSO-*d*<sub>6</sub>) δ 169.6, 169.6, 166.0, 165.9, 136.6, 136.1, 133.5, 129.0, 128.8, 126.6, 126.2, 122.5, 120.2, 119.9, 115.7, 111.5, 110.6, 110.2, 107.2, 59.0, 55.8, 55.7, 45.1, 28.2, 28.2, 26.3, 26.3, 22.4, 22.4;

**FTIR:** (NaCl, thin film): cm<sup>-1</sup>; 3365, 3246, 2933, 1666, 1459, 1414;

**[α]<sub>D</sub><sup>25</sup>** = -90.6 (*c* = 0.625, 1:1 CH<sub>2</sub>Cl<sub>2</sub>:MeOH);

**HRMS:** (MM) calc'd [M+H]<sup>+</sup> 565.2558, found 565.2555.

**<sup>1</sup>H NMR:** (500 MHz, CD<sub>2</sub>Cl<sub>2</sub>) δ 8.71 (s, 1H), 7.82 – 7.68 (m, 1H), 7.56 (d, *J* = 8.3 Hz, 1H), 7.50 – 7.40 (m, 1H), 7.33 (s, 1H), 7.23 (s, 1H), 7.21 – 7.07 (m, 4H), 6.82 (s, 1H), 5.97 (s, 1H), 4.54 – 4.39 (m, 1H), 4.39 – 4.24 (m, 1H), 4.03 (dt, *J* = 13.2, 7.5 Hz, 2H), 3.74 – 3.46 (m, 4H), 3.40 (tt, *J* = 7.8, 3.2 Hz, 1H), 3.29 (dt, *J* = 10.9, 7.7 Hz, 1H), 3.20 (dd, *J* = 15.1, 8.8 Hz, 1H), 3.00 (dd, *J* = 15.1, 9.9 Hz, 1H), 2.23 (dt, *J* = 9.5, 6.6 Hz, 1H), 2.20 – 2.14 (m, 1H), 1.97 – 1.79 (m, 2H), 1.78 – 1.67 (m, 2H).

**<sup>13</sup>C NMR:** (126 MHz, CD<sub>2</sub>Cl<sub>2</sub>) δ 170.5, 170.0, 165.9, 165.9, 137.3, 137.2, 134.8, 128.9, 128.8, 126.2, 125.5, 123.2, 120.6, 119.8, 119.8, 117.4, 111.4, 111.0, 110.4, 107.9, 59.7, 55.5, 55.2, 45.8, 45.6, 28.8, 28.7, 27.0, 26.8, 23.1, 22.9.

**Table S1. Comparison of <sup>1</sup>H NMR data for Natural vs. Synthetic (-)-Aspergilazine A**

| <b>Isolation<sup>7</sup><br/>(-)-Aspergilazine A<br/><sup>1</sup>H NMR, 600 MHz, DMSO-<i>d</i><sub>6</sub></b> | <b>This Work<br/>(-)-Aspergilazine A<br/><sup>1</sup>H NMR, 500 MHz, DMSO-<i>d</i><sub>6</sub></b> |
|----------------------------------------------------------------------------------------------------------------|----------------------------------------------------------------------------------------------------|
| 11.09 (s, 1H)                                                                                                  | 11.05 (s, 1H)                                                                                      |
| 8.00 (s, 1H)                                                                                                   | 7.99 (s, 1H)                                                                                       |
| 7.89 (s, 1H)                                                                                                   | 7.87 (s, 1H)                                                                                       |
| 7.75 (br d, <i>J</i> = 8.4 Hz, 1H)                                                                             | 7.74 (d, <i>J</i> = 8.4 Hz, 1H)                                                                    |
| 7.68 (br d, <i>J</i> = 7.8 Hz, 1H)                                                                             | 7.67 (d, <i>J</i> = 7.9 Hz, 1H)                                                                    |
| 7.48 (d, <i>J</i> = 8.2 Hz, 1H)                                                                                | 7.47 (d, <i>J</i> = 8.3 Hz, 1H)                                                                    |
| 7.47 (s, 1H)                                                                                                   | 7.46 (s, 1H)                                                                                       |
| 7.45 (d, <i>J</i> = 1.9 Hz, 1H)                                                                                | 7.44 (d, <i>J</i> = 1.9 Hz, 1H)                                                                    |
| 7.29 (d, <i>J</i> = 1.7 Hz, 1H)                                                                                | 7.28 (d, <i>J</i> = 2.3 Hz, 1H)                                                                    |
| 7.16 (ddd, <i>J</i> = 7.7, 7.4, 1.0 1H)                                                                        | 7.16 (t, <i>J</i> = 7.6 Hz, 1H)                                                                    |
| 7.14 (dd, <i>J</i> = 8.3, 1.9, 1H)                                                                             | 7.14 (dd, <i>J</i> = 8.2, 1.7 Hz, 1H)                                                              |
| 7.09 (ddd, <i>J</i> = 7.4, 7.4, 0.8 1H)                                                                        | 7.09 (t, <i>J</i> = 7.4 Hz, 1H)                                                                    |
| 4.41 (dd, <i>J</i> = 4.9, 5.0 Hz, 1H)                                                                          | 4.40 (t, <i>J</i> = 4.8 Hz, 1H)                                                                    |
| 4.37 (dd, <i>J</i> = 5.0, 5.0 Hz, 1H)                                                                          | 4.36 (t, <i>J</i> = 5.2 Hz, 1H)                                                                    |
| 4.07 (dd, <i>J</i> = 8.3, 8.3 Hz, 2H)                                                                          | 4.16 – 4.00 (m, 2H)                                                                                |
| 3.38 (m, 3H)                                                                                                   | 3.46 – 3.29 (m, 3H)                                                                                |
| 3.26 (m, 3H)                                                                                                   | 3.33 – 3.20 (m, 3H)                                                                                |
| 3.16 (m, 2H)                                                                                                   | 3.15 (dd, <i>J</i> = 14.9, 5.7 Hz, 2H)                                                             |
| 1.98 (m, 2H)                                                                                                   | 2.05 – 1.89 (m, 2H)                                                                                |
| 1.65 (m, 4H)                                                                                                   | 1.82 – 1.51 (m, 4H)                                                                                |
| 1.37 (m, 2H)                                                                                                   | 1.47 – 1.31 (m, 2H)                                                                                |

**Table S2. Comparison of  $^{13}\text{C}$  NMR data for Natural vs. Synthetic (-)-Aspergilazine A**

| <b>Isolation<sup>7</sup><br/>(-)-Aspergilazine A<br/><math>^{13}\text{C}</math> NMR, 150 MHz, DMSO</b> | <b>This Work<br/>(-)-Aspergilazine A<br/><math>^{13}\text{C}</math> NMR, 126 MHz, DMSO</b> | <b>Chemical Shift Difference, <math>\Delta\delta</math></b> |
|--------------------------------------------------------------------------------------------------------|--------------------------------------------------------------------------------------------|-------------------------------------------------------------|
| 169.7                                                                                                  | 169.6                                                                                      | 0.1                                                         |
| 169.6                                                                                                  | 169.6                                                                                      | 0.0                                                         |
| 166.0                                                                                                  | 166.0                                                                                      | 0.0                                                         |
| 165.9                                                                                                  | 165.9                                                                                      | 0.0                                                         |
| 136.7                                                                                                  | 136.6                                                                                      | 0.1                                                         |
| 136.2                                                                                                  | 136.1                                                                                      | 0.1                                                         |
| 133.6                                                                                                  | 133.5                                                                                      | 0.1                                                         |
| 129.1                                                                                                  | 129.0                                                                                      | 0.1                                                         |
| 128.9                                                                                                  | 128.8                                                                                      | 0.1                                                         |
| 126.6                                                                                                  | 126.6                                                                                      | 0.0                                                         |
| 126.3                                                                                                  | 126.2                                                                                      | 0.1                                                         |
| 122.6                                                                                                  | 122.5                                                                                      | 0.1                                                         |
| 120.3                                                                                                  | 120.2                                                                                      | 0.1                                                         |
| 119.9                                                                                                  | 119.9                                                                                      | 0.0                                                         |
| 115.8                                                                                                  | 115.7                                                                                      | 0.1                                                         |
| 111.5                                                                                                  | 111.5                                                                                      | 0.0                                                         |
| 110.6                                                                                                  | 110.6                                                                                      | 0.0                                                         |
| 110.3                                                                                                  | 110.2                                                                                      | 0.1                                                         |
| 107.2                                                                                                  | 107.2                                                                                      | 0.0                                                         |
| 59.0                                                                                                   | 59.0                                                                                       | 0.0                                                         |
| 59.0                                                                                                   | 59.0                                                                                       | 0.0                                                         |
| 55.8                                                                                                   | 55.8                                                                                       | 0.0                                                         |
| 55.7                                                                                                   | 55.7                                                                                       | 0.0                                                         |
| 45.2                                                                                                   | 45.1                                                                                       | 0.1                                                         |
| 45.2                                                                                                   | 45.1                                                                                       | 0.1                                                         |
| 28.3                                                                                                   | 28.2                                                                                       | 0.1                                                         |
| 28.3                                                                                                   | 28.2                                                                                       | 0.1                                                         |
| 26.4                                                                                                   | 26.3                                                                                       | 0.1                                                         |
| 26.3                                                                                                   | 26.3                                                                                       | 0.0                                                         |
| 22.4                                                                                                   | 22.4                                                                                       | 0.0                                                         |
| 22.4                                                                                                   | 22.4                                                                                       | 0.0                                                         |

8.90  
8.90  
8.90  
8.89  
8.17  
8.17  
8.17  
8.17  
8.16  
8.15  
8.15  
8.15  
7.72  
7.71  
7.45  
7.45  
7.44  
7.43  
7.40  
7.39  
7.38  
7.37

—4.68

| Parameter              | Value                                                                      |
|------------------------|----------------------------------------------------------------------------|
| Data File Name         | / Volumes/ data/ indy/ mkieffer/ vnmrsys/ data/ MEK6145/ PROTON01.fid/ fid |
| Title                  | PROTON01                                                                   |
| Origin                 | Varian                                                                     |
| Solvent                | cdcl3                                                                      |
| Temperature            | 25.0                                                                       |
| Pulse Sequence         | s2pul                                                                      |
| Number of Scans        | 32                                                                         |
| Receiver Gain          | 42                                                                         |
| Relaxation Delay       | 5.0000                                                                     |
| Pulse Width            | 4.9500                                                                     |
| Acquisition Time       | 3.0000                                                                     |
| Acquisition Date       | 2014-01-15T21:00:51                                                        |
| Spectrometer Frequency | 499.70                                                                     |
| Spectral Width         | 8000.0                                                                     |
| Lowest Frequency       | -1004.3                                                                    |
| Nucleus                | 1H                                                                         |
| Acquired Size          | 24000                                                                      |
| Spectral Size          | 65536                                                                      |

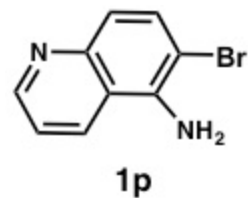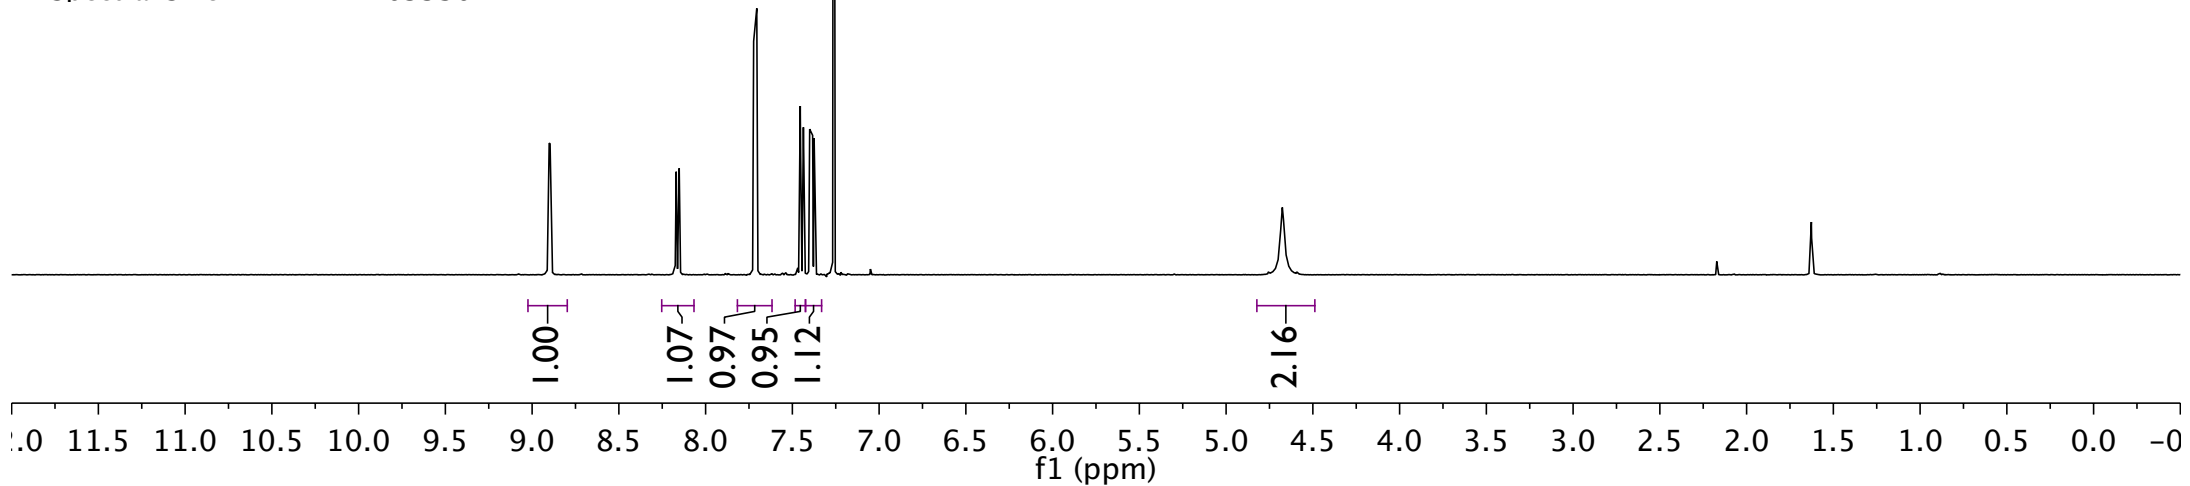

| Parameter              | Value                                                                      |
|------------------------|----------------------------------------------------------------------------|
| Data File Name         | / Volumes/ data/ indy/ mkieffer/ vnmrsys/ data/ MEK6145/ CARBON01 fid/ fid |
| Title                  | CARBON01                                                                   |
| Origin                 | Varian                                                                     |
| Solvent                | cdcl3                                                                      |
| Temperature            | 25.0                                                                       |
| Pulse Sequence         | s2pul                                                                      |
| Number of Scans        | 512                                                                        |
| Receiver Gain          | 30                                                                         |
| Relaxation Delay       | 1.0000                                                                     |
| Pulse Width            | 4.2500                                                                     |
| Acquisition Time       | 1.0420                                                                     |
| Acquisition Date       | 2014-01-15T21:05:23                                                        |
| Spectrometer Frequency | 125.66                                                                     |
| Spectral Width         | 31446.5                                                                    |
| Lowest Frequency       | -1882.1                                                                    |
| Nucleus                | <sup>13</sup> C                                                            |
| Acquired Size          | 32768                                                                      |
| Spectral Size          | 65536                                                                      |

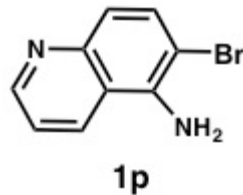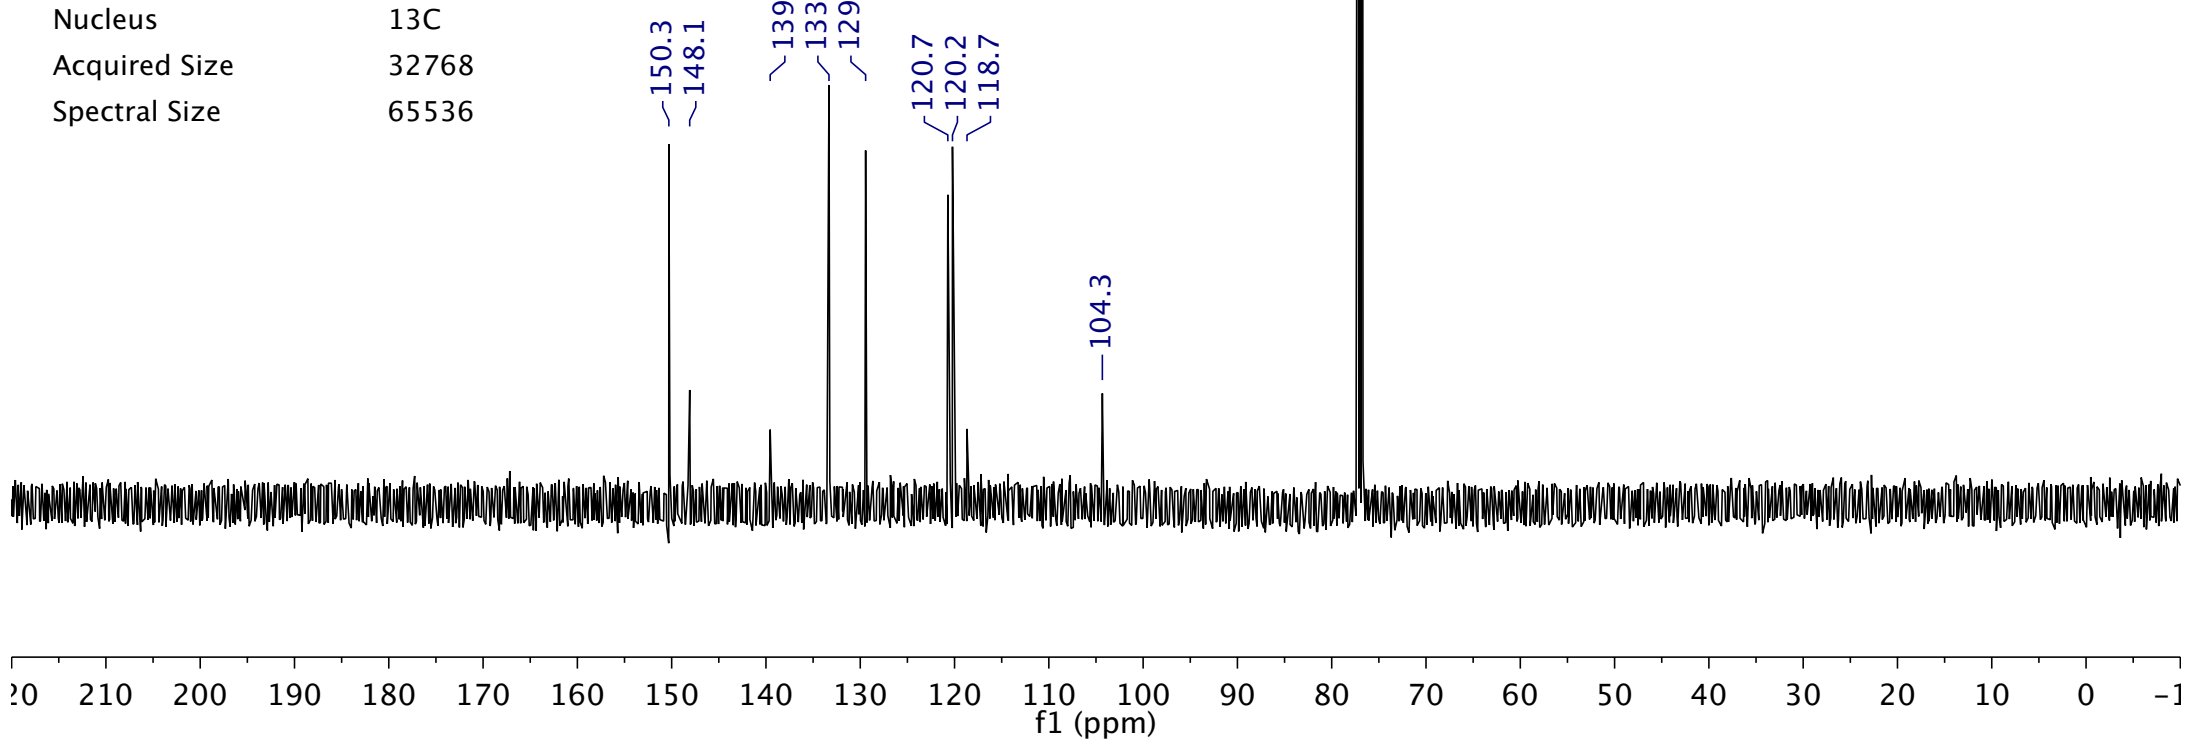



| Parameter              | Value                                                                      |
|------------------------|----------------------------------------------------------------------------|
| Data File Name         | / Volumes/ data/ indy/ mkieffer/ vnmrsys/ data/ MEK6133/ PROTON02.fid/ fid |
| Title                  | PROTON02                                                                   |
| Origin                 | Varian                                                                     |
| Solvent                | cdcl3                                                                      |
| Temperature            | 25.0                                                                       |
| Pulse Sequence         | s2pul                                                                      |
| Number of Scans        | 32                                                                         |
| Receiver Gain          | 22                                                                         |
| Relaxation Delay       | 5.0000                                                                     |
| Pulse Width            | 4.9500                                                                     |
| Acquisition Time       | 3.0000                                                                     |
| Acquisition Date       | 2013-12-19T16:45:52                                                        |
| Spectrometer Frequency | 499.70                                                                     |
| Spectral Width         | 8000.0                                                                     |
| Lowest Frequency       | -1004.3                                                                    |
| Nucleus                | 1H                                                                         |
| Acquired Size          | 24000                                                                      |
| Spectral Size          | 65536                                                                      |

7.86  
7.86  
7.53  
7.53  
7.53  
7.52  
7.51  
7.26  
6.73  
6.71

4.29

1.32

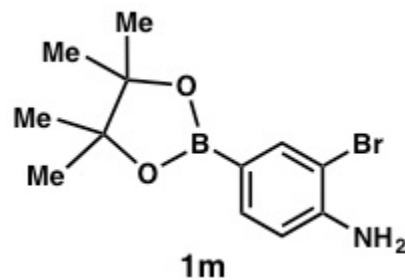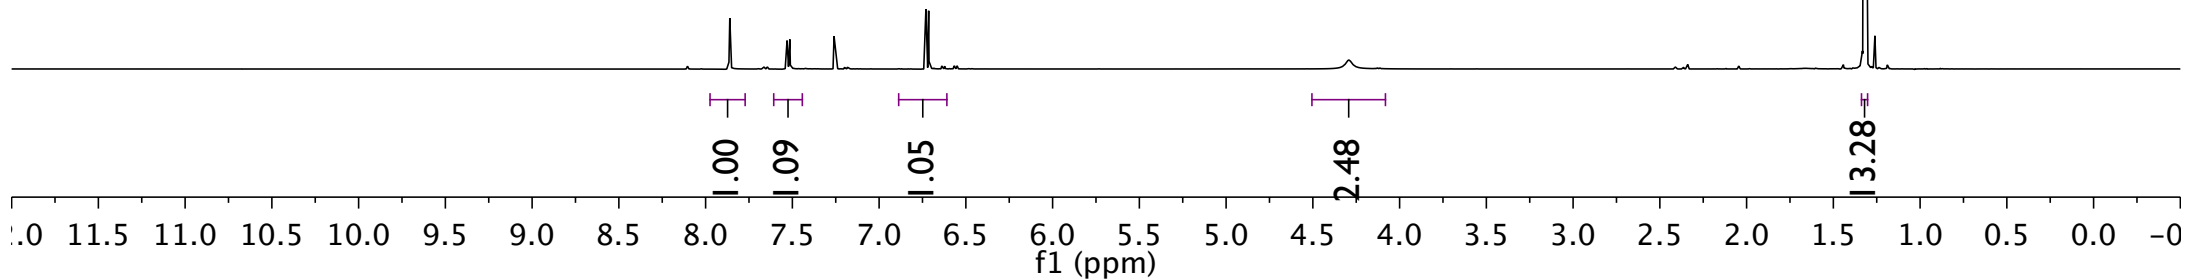

| Parameter              | Value                                                                      |
|------------------------|----------------------------------------------------------------------------|
| Data File Name         | / Volumes/ data/ indy/ mkieffer/ vnmrsys/ data/ MEK6133/ CARBON01.fid/ fid |
| Title                  | CARBON01                                                                   |
| Origin                 | Varian                                                                     |
| Solvent                | cdcl3                                                                      |
| Temperature            | 25.0                                                                       |
| Pulse Sequence         | s2pul                                                                      |
| Number of Scans        | 512                                                                        |
| Receiver Gain          | 30                                                                         |
| Relaxation Delay       | 1.0000                                                                     |
| Pulse Width            | 4.2500                                                                     |
| Acquisition Time       | 1.0420                                                                     |
| Acquisition Date       | 2013-12-19T16:50:23                                                        |
| Spectrometer Frequency | 125.66                                                                     |
| Spectral Width         | 31446.5                                                                    |
| Lowest Frequency       | -1901.9                                                                    |
| Nucleus                | <sup>13</sup> C                                                            |
| Acquired Size          | 32768                                                                      |
| Spectral Size          | 65536                                                                      |

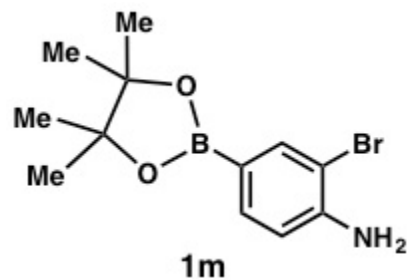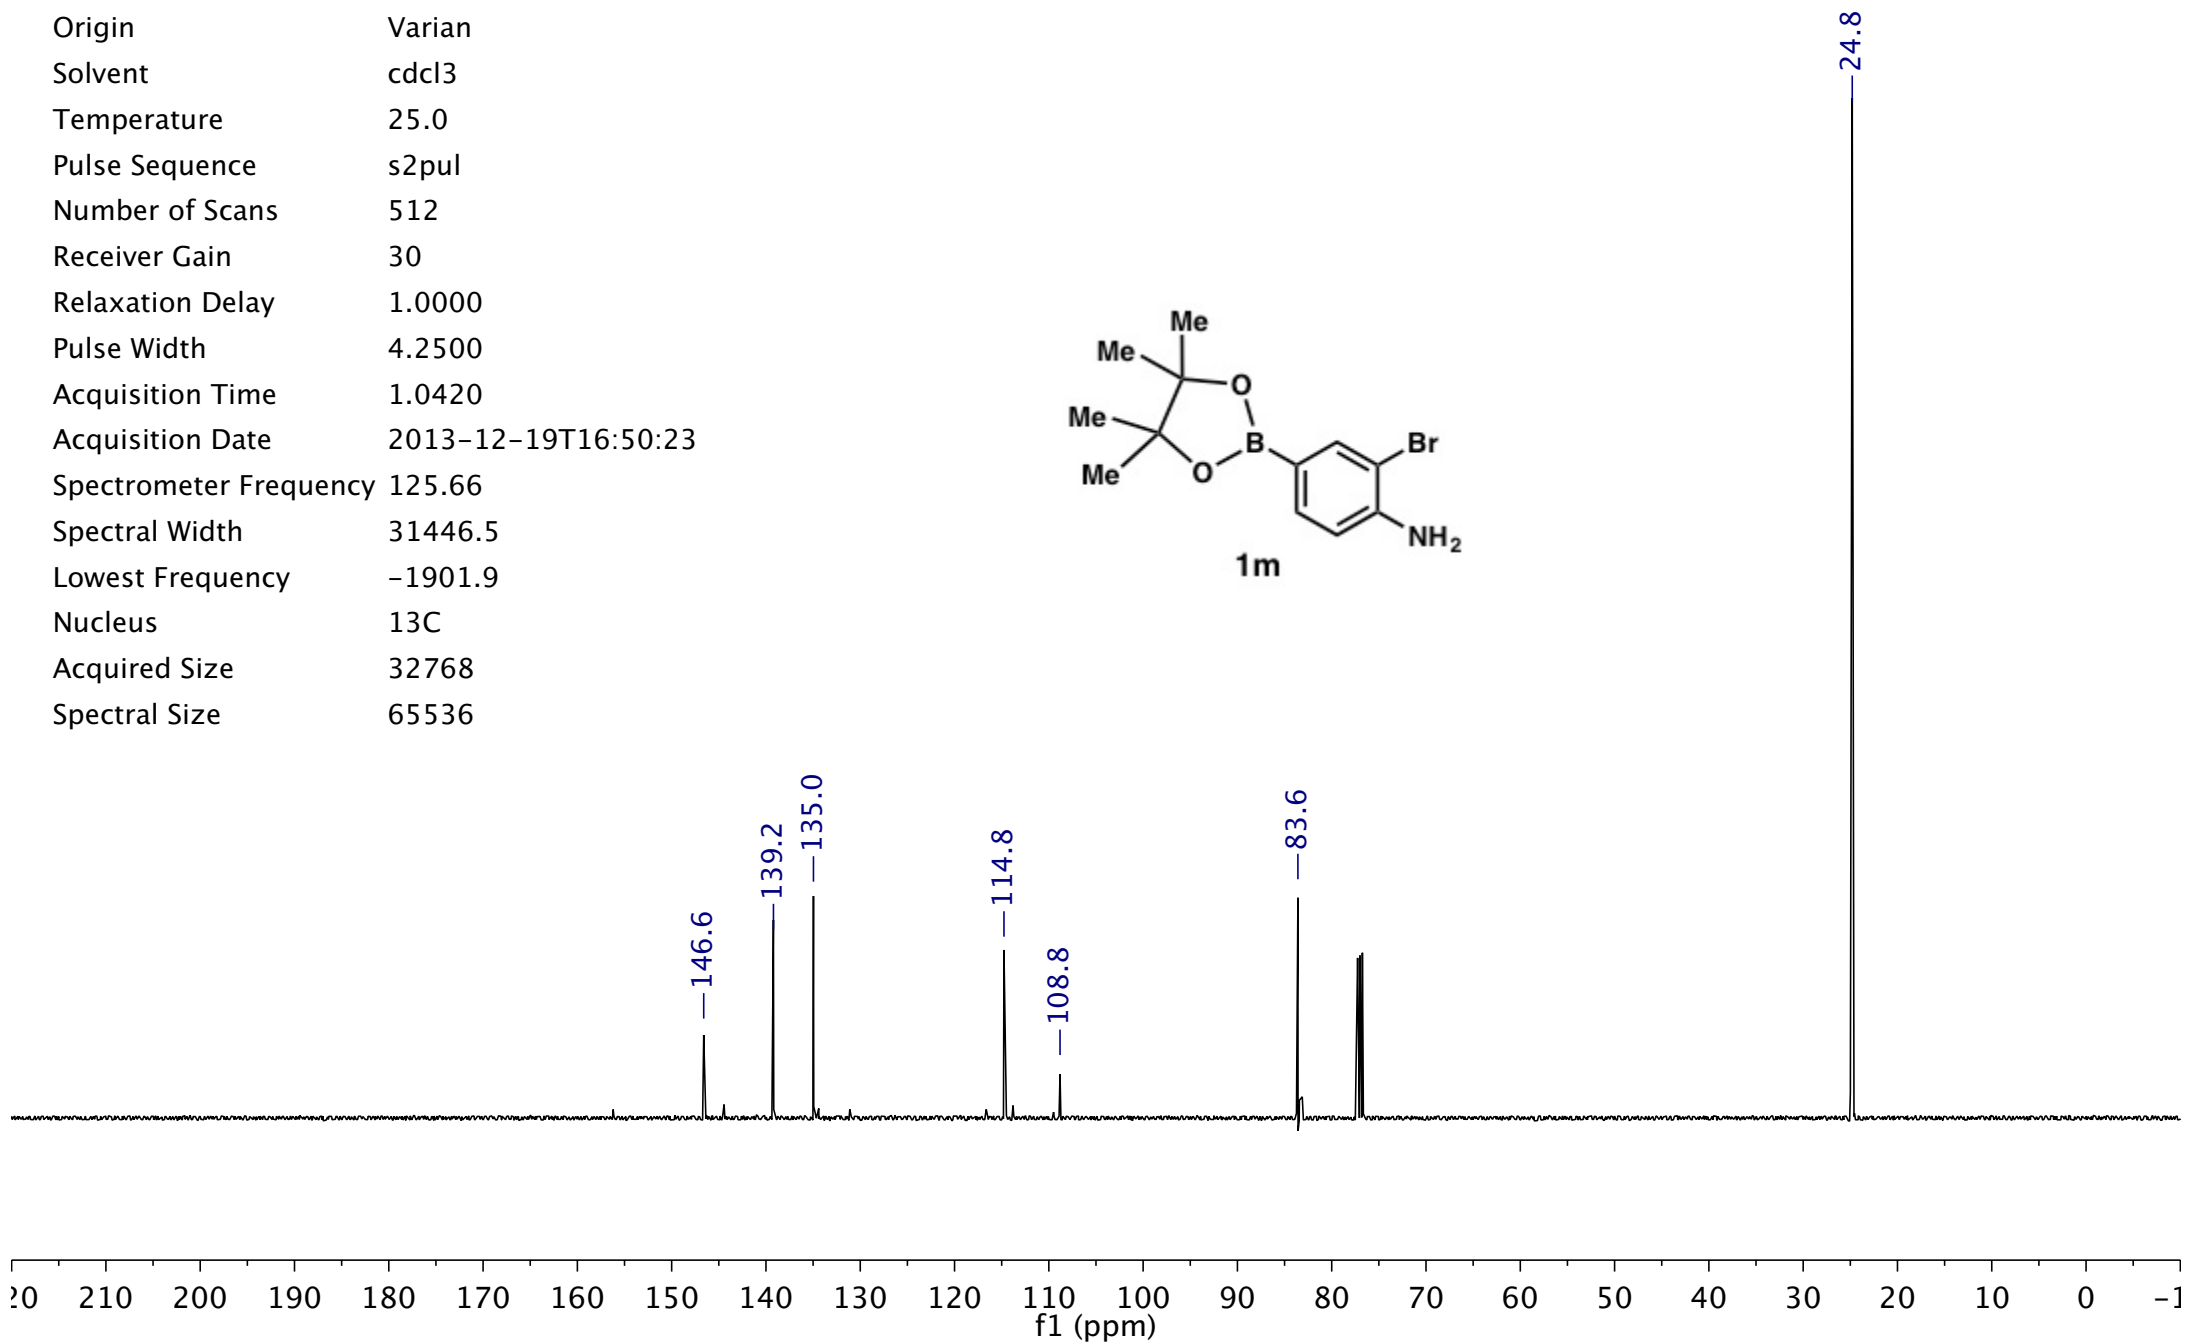

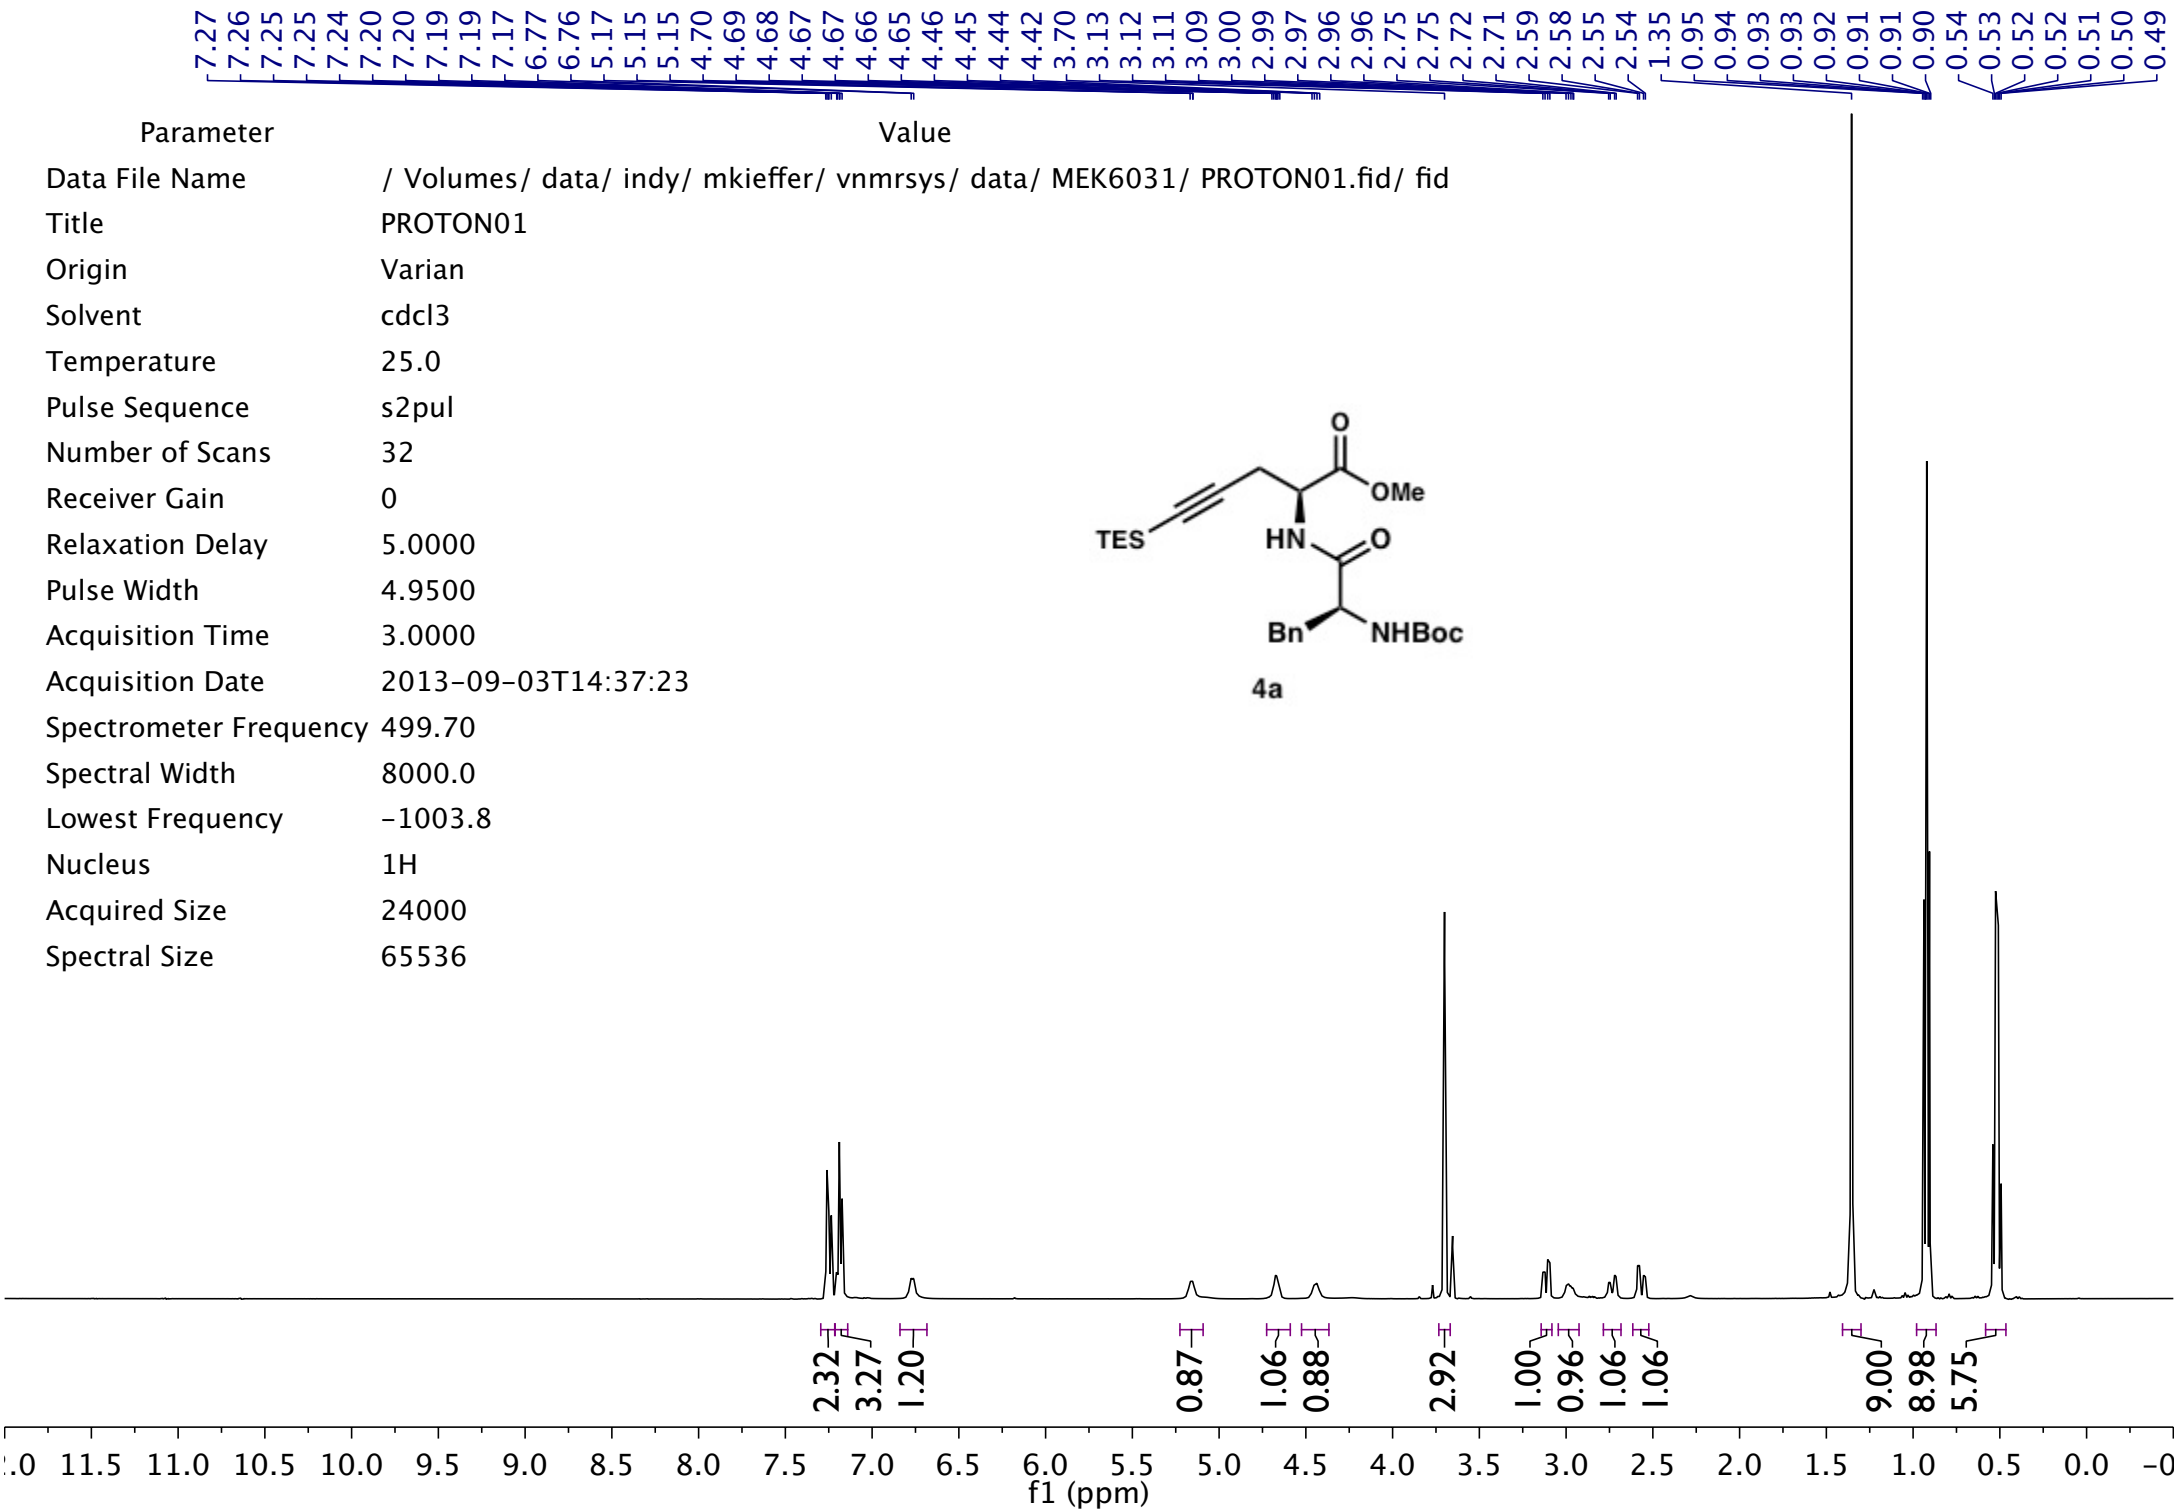

| Parameter              | Value                                                                      |
|------------------------|----------------------------------------------------------------------------|
| Data File Name         | / Volumes/ data/ indy/ mkieffer/ vnmrsys/ data/ MEK6031/ CARBON01.fid/ fid |
| Title                  | CARBON01                                                                   |
| Origin                 | Varian                                                                     |
| Solvent                | cdcl3                                                                      |
| Temperature            | 25.0                                                                       |
| Pulse Sequence         | s2pul                                                                      |
| Number of Scans        | 256                                                                        |
| Receiver Gain          | 30                                                                         |
| Relaxation Delay       | 1.0000                                                                     |
| Pulse Width            | 4.2500                                                                     |
| Acquisition Time       | 1.0420                                                                     |
| Acquisition Date       | 2013-09-03T14:41:55                                                        |
| Spectrometer Frequency | 125.66                                                                     |
| Spectral Width         | 31446.5                                                                    |
| Lowest Frequency       | -1901.9                                                                    |
| Nucleus                | <sup>13</sup> C                                                            |
| Acquired Size          | 32768                                                                      |
| Spectral Size          | 65536                                                                      |

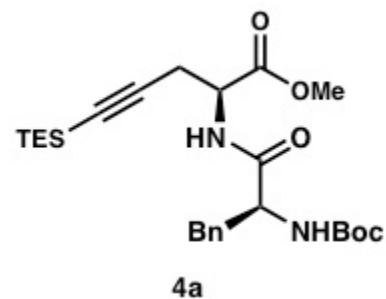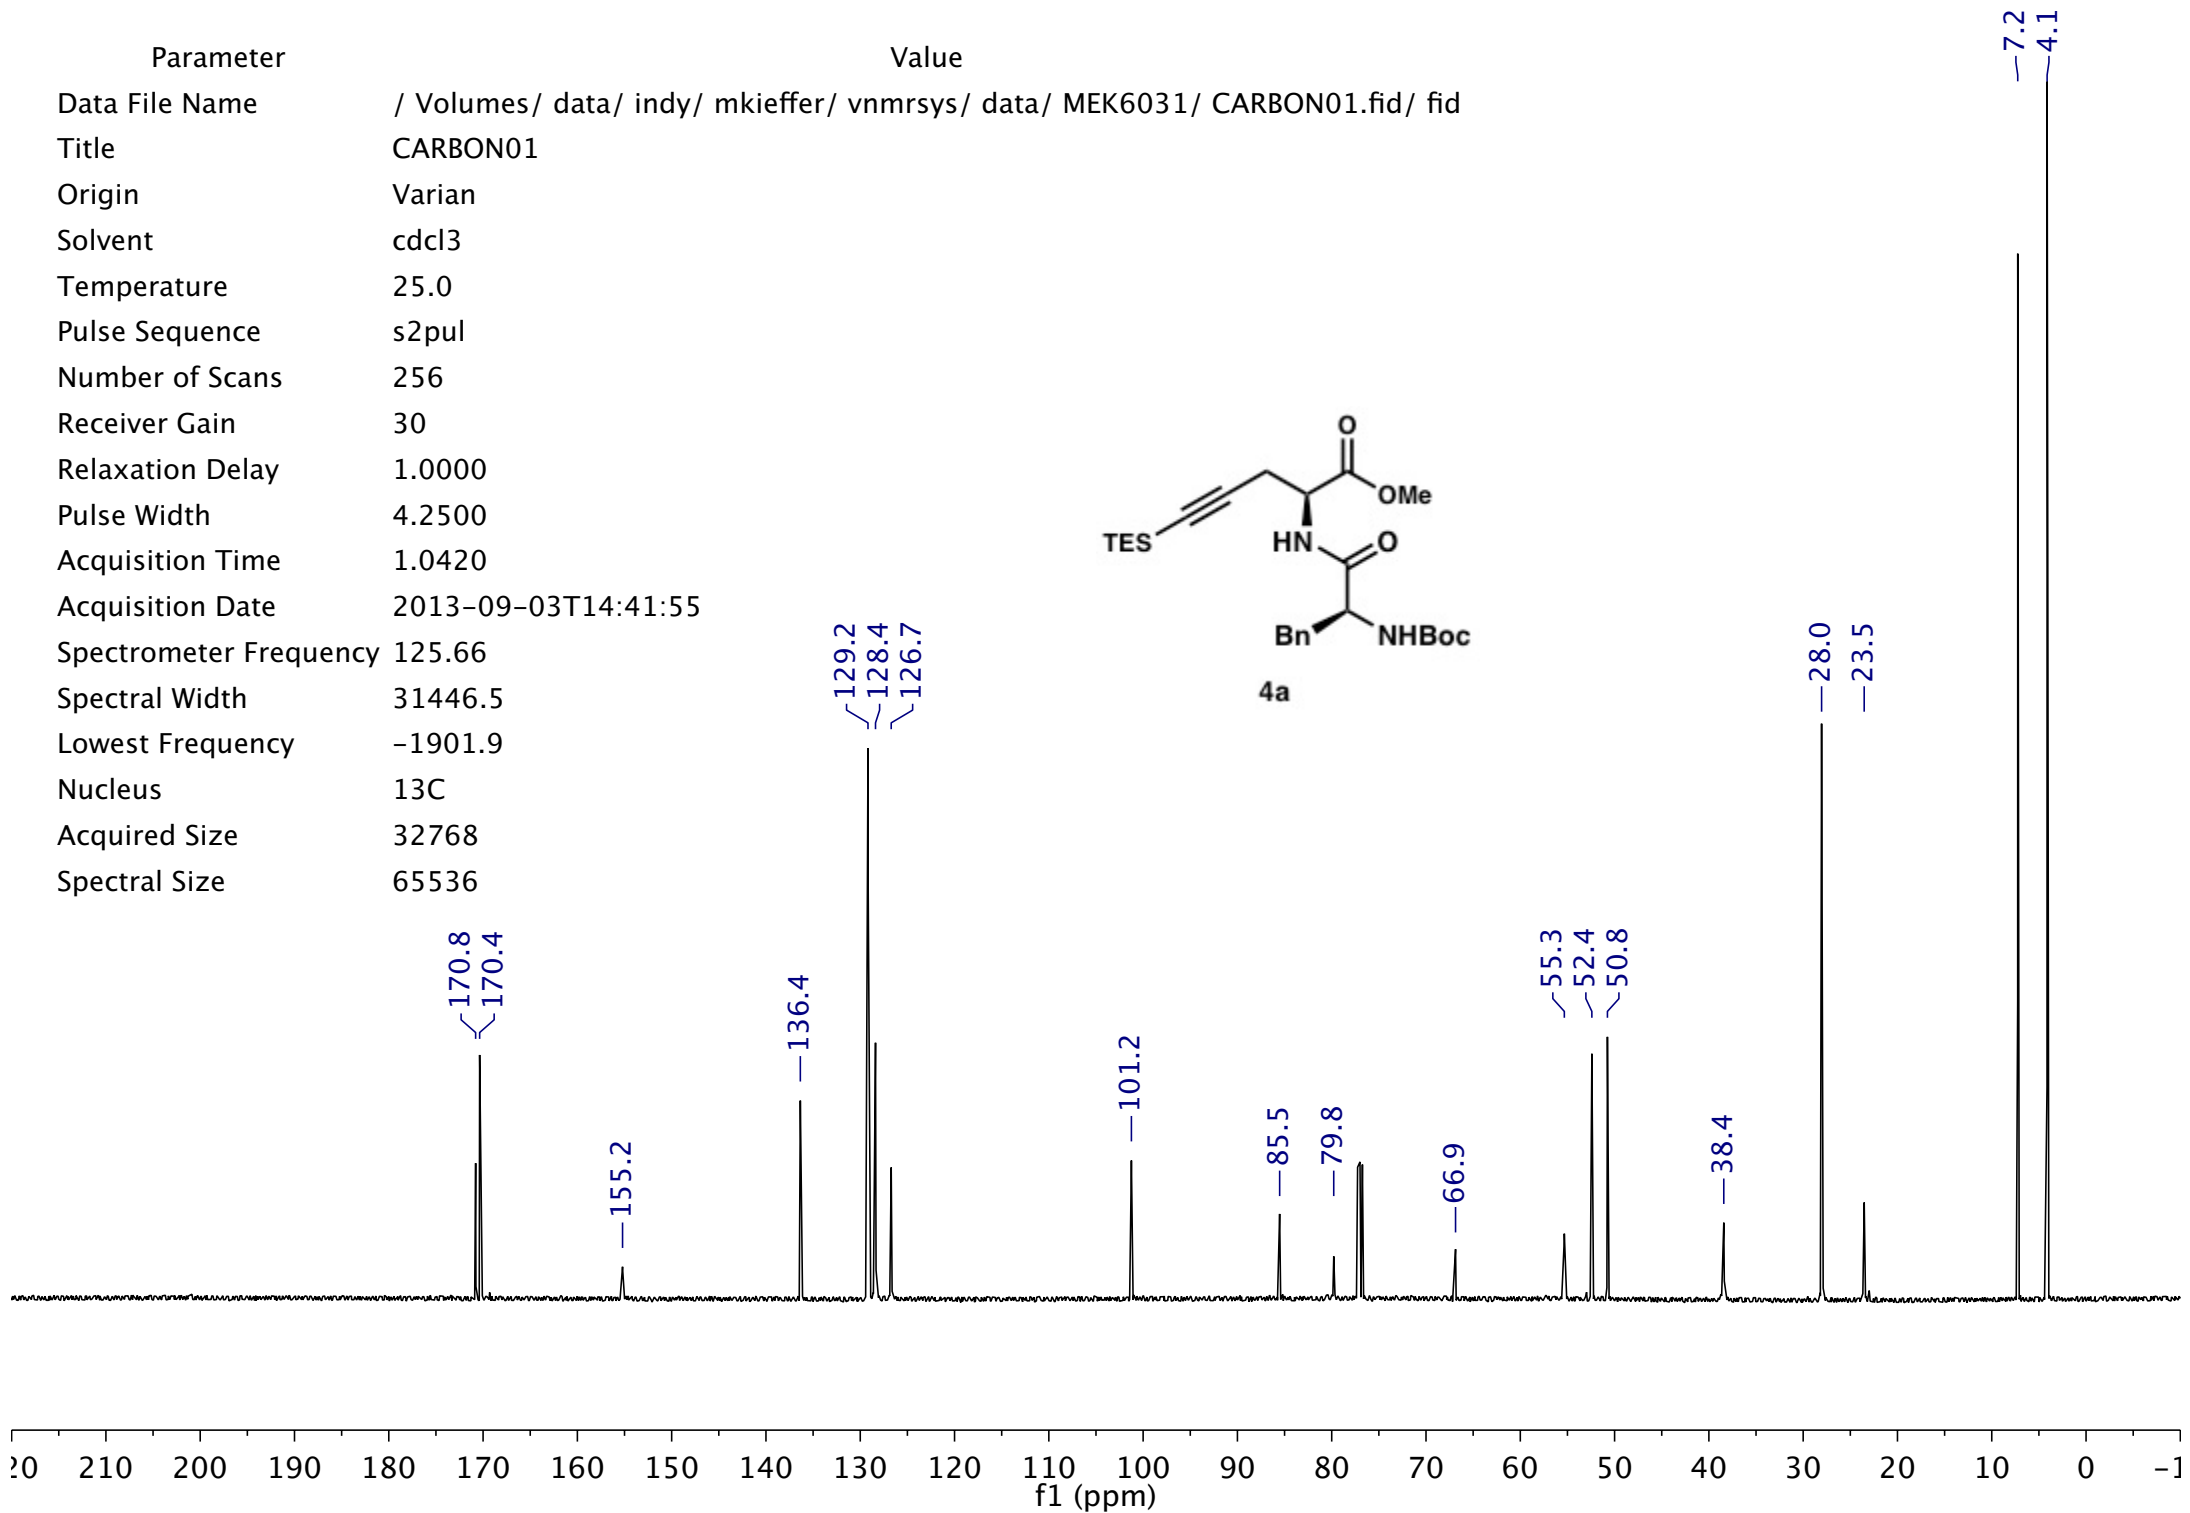

8.35 8.35 8.03 8.02 7.27 7.27 7.27 7.26 7.26 7.26 7.25 7.24 7.24 7.24 7.24 7.23 7.23 7.23 7.22 7.22 7.20 7.17 7.17 7.17 7.16 7.16 7.15 7.15 4.16 4.16 4.15 4.15 4.15 4.15 4.15 4.14 4.14 4.14 4.14 3.17 3.17 3.17 3.17 3.16 3.16 3.15 3.13 3.12 3.12 2.90 2.89 2.88 2.87 2.65 2.64 2.61 2.61 2.42 2.41 2.41 2.39 2.38 2.38 0.92 0.91 0.89 0.52 0.51 0.49 0.47

| Parameter              | Value                                                                       |
|------------------------|-----------------------------------------------------------------------------|
| Data File Name         | / Volumes/ data/ indy/ kangway/ vnmrsys/ data/ KVC16-065/ PROTON02.fid/ fid |
| Title                  | PROTON02                                                                    |
| Origin                 | Varian                                                                      |
| Solvent                | dms0                                                                        |
| Temperature            | 25.0                                                                        |
| Pulse Sequence         | s2pul                                                                       |
| Number of Scans        | 32                                                                          |
| Receiver Gain          | 32                                                                          |
| Relaxation Delay       | 5.0000                                                                      |
| Pulse Width            | 4.9500                                                                      |
| Acquisition Time       | 3.0000                                                                      |
| Acquisition Date       | 2014-02-02T23:06:12                                                         |
| Spectrometer Frequency | 499.70                                                                      |
| Spectral Width         | 8000.0                                                                      |
| Lowest Frequency       | -996.3                                                                      |
| Nucleus                | 1H                                                                          |
| Acquired Size          | 24000                                                                       |
| Spectral Size          | 65536                                                                       |

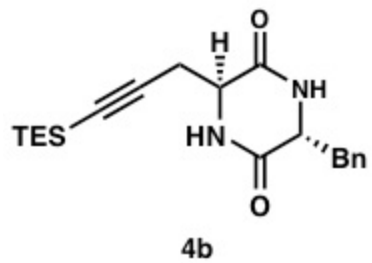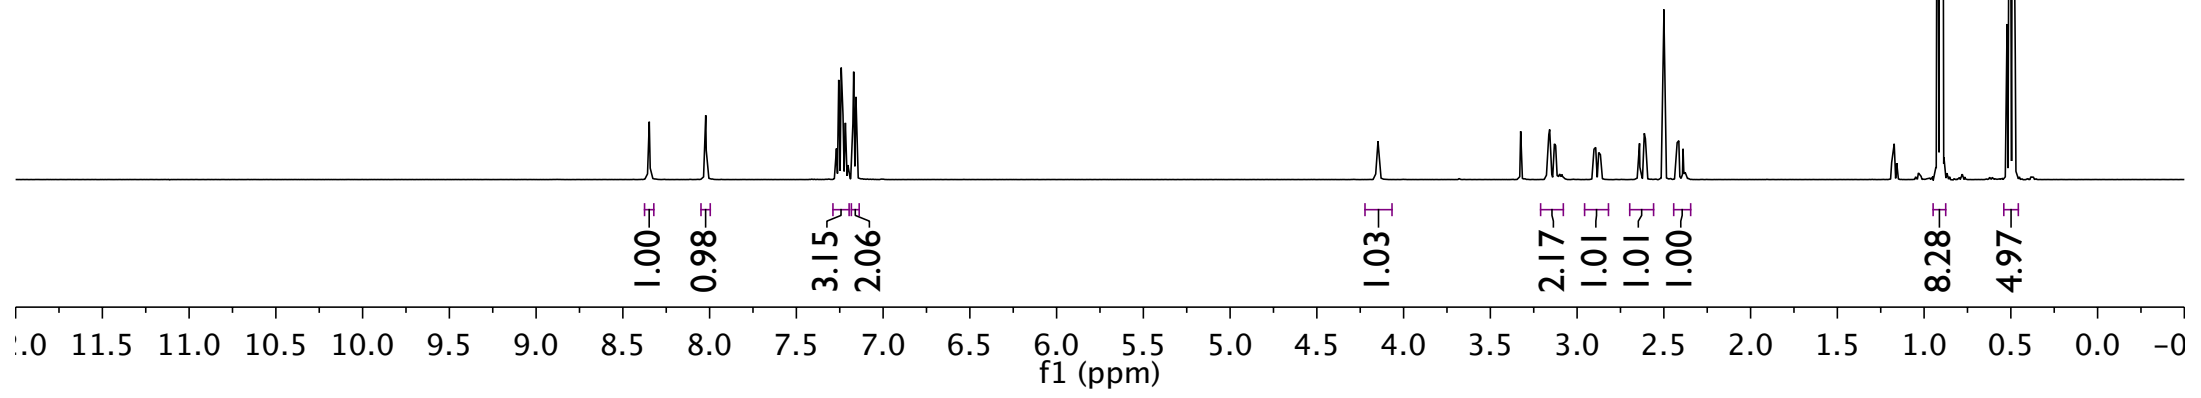

| Parameter              | Value                                                                       |
|------------------------|-----------------------------------------------------------------------------|
| Data File Name         | / Volumes/ data/ indy/ kangway/ vnmrsys/ data/ KVC16-065/ CARBON01.fid/ fid |
| Title                  | CARBON01                                                                    |
| Origin                 | Varian                                                                      |
| Solvent                | dmsO                                                                        |
| Temperature            | 25.0                                                                        |
| Pulse Sequence         | s2pul                                                                       |
| Number of Scans        | 512                                                                         |
| Receiver Gain          | 30                                                                          |
| Relaxation Delay       | 1.0000                                                                      |
| Pulse Width            | 4.2500                                                                      |
| Acquisition Time       | 1.0420                                                                      |
| Acquisition Date       | 2014-02-02T23:10:51                                                         |
| Spectrometer Frequency | 125.66                                                                      |
| Spectral Width         | 31446.5                                                                     |
| Lowest Frequency       | -1958.3                                                                     |
| Nucleus                | <sup>13</sup> C                                                             |
| Acquired Size          | 32768                                                                       |
| Spectral Size          | 65536                                                                       |

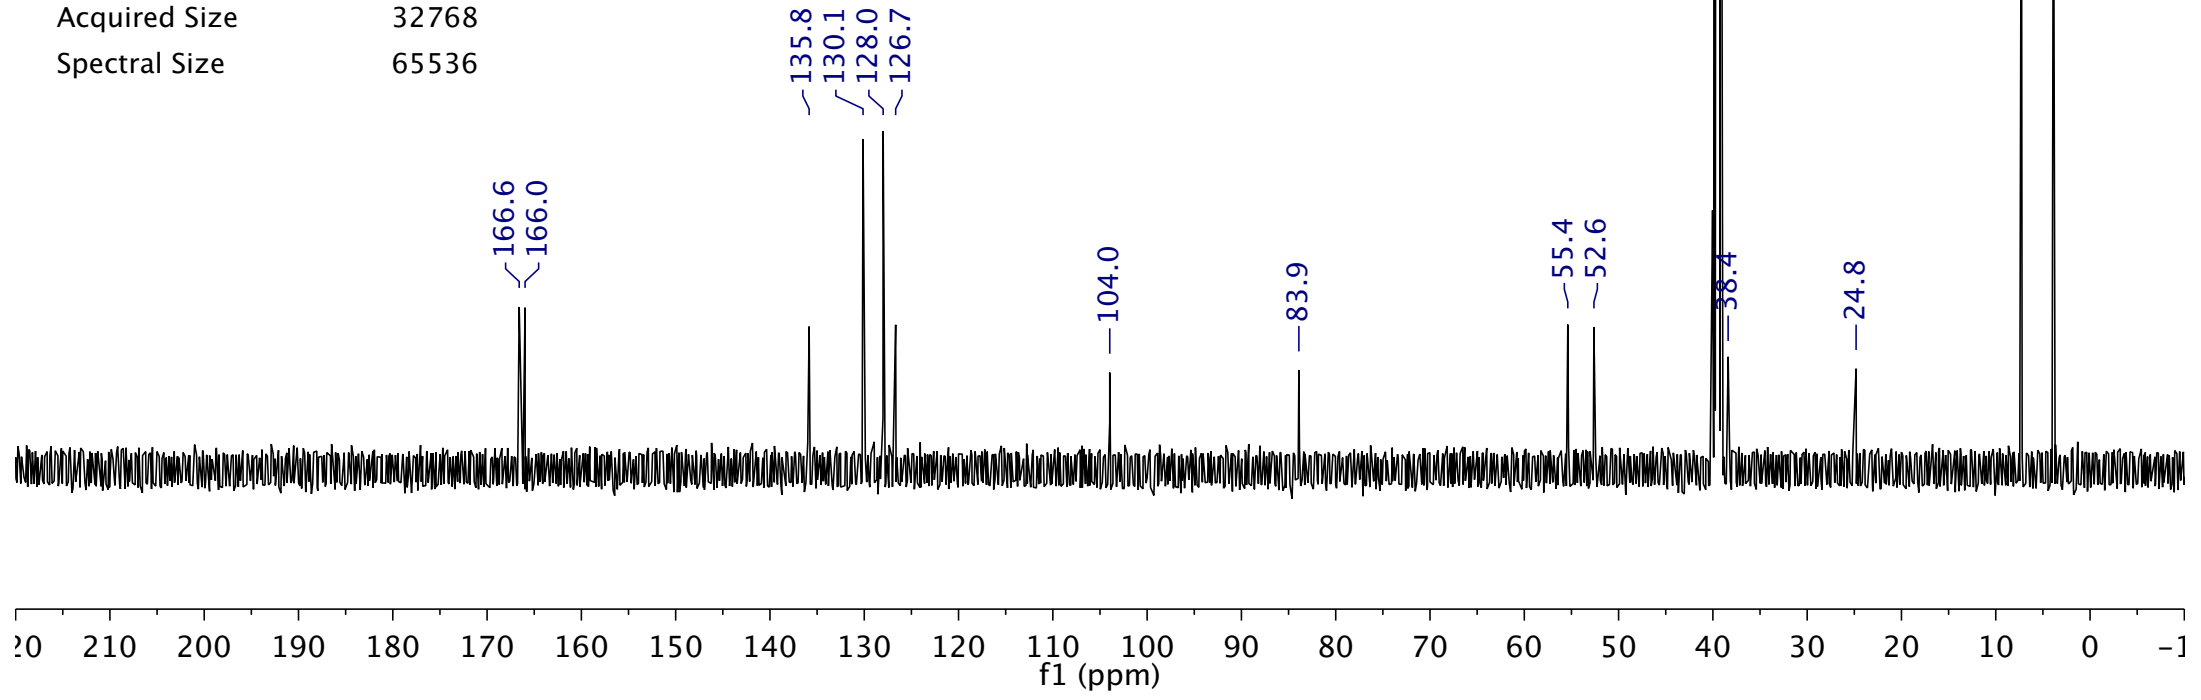

7.28  
7.28  
7.27  
7.27  
7.26  
7.26  
7.25  
7.25  
7.25  
7.24  
7.23  
7.23  
7.23  
7.22  
7.22  
7.21  
7.10  
7.09  
7.09  
7.08  
7.08  
7.07  
6.85  
6.84  
5.25  
5.25  
4.83  
4.82  
4.82  
4.81  
4.80  
4.79  
4.23  
4.21  
4.21  
3.67  
3.10  
3.09  
3.09  
3.07  
3.06  
2.73  
2.71  
2.67  
2.66  
2.64  
2.63  
1.42  
0.97  
0.96  
0.96  
0.95  
0.95  
0.94  
0.93  
0.92  
0.57  
0.56  
0.55  
0.55  
0.55  
0.54  
0.53  
0.52

| Parameter              | Value                                                                     |
|------------------------|---------------------------------------------------------------------------|
| Data File Name         | / Volumes/ data/ indy/ mkieffer/ vnmsys/ data/ MEK6023/ PROTON01.fid/ fid |
| Title                  | PROTON01                                                                  |
| Origin                 | Varian                                                                    |
| Solvent                | cdcl3                                                                     |
| Temperature            | 25.0                                                                      |
| Pulse Sequence         | s2pul                                                                     |
| Number of Scans        | 32                                                                        |
| Receiver Gain          | 12                                                                        |
| Relaxation Delay       | 5.0000                                                                    |
| Pulse Width            | 4.9500                                                                    |
| Acquisition Time       | 3.0000                                                                    |
| Acquisition Date       | 2013-09-02T21:13:57                                                       |
| Spectrometer Frequency | 499.70                                                                    |
| Spectral Width         | 8000.0                                                                    |
| Lowest Frequency       | -1003.8                                                                   |
| Nucleus                | 1H                                                                        |
| Acquired Size          | 24000                                                                     |
| Spectral Size          | 65536                                                                     |

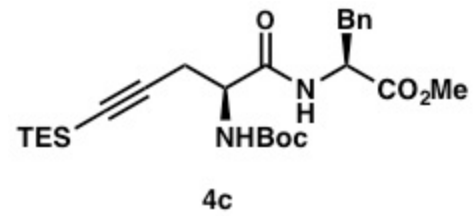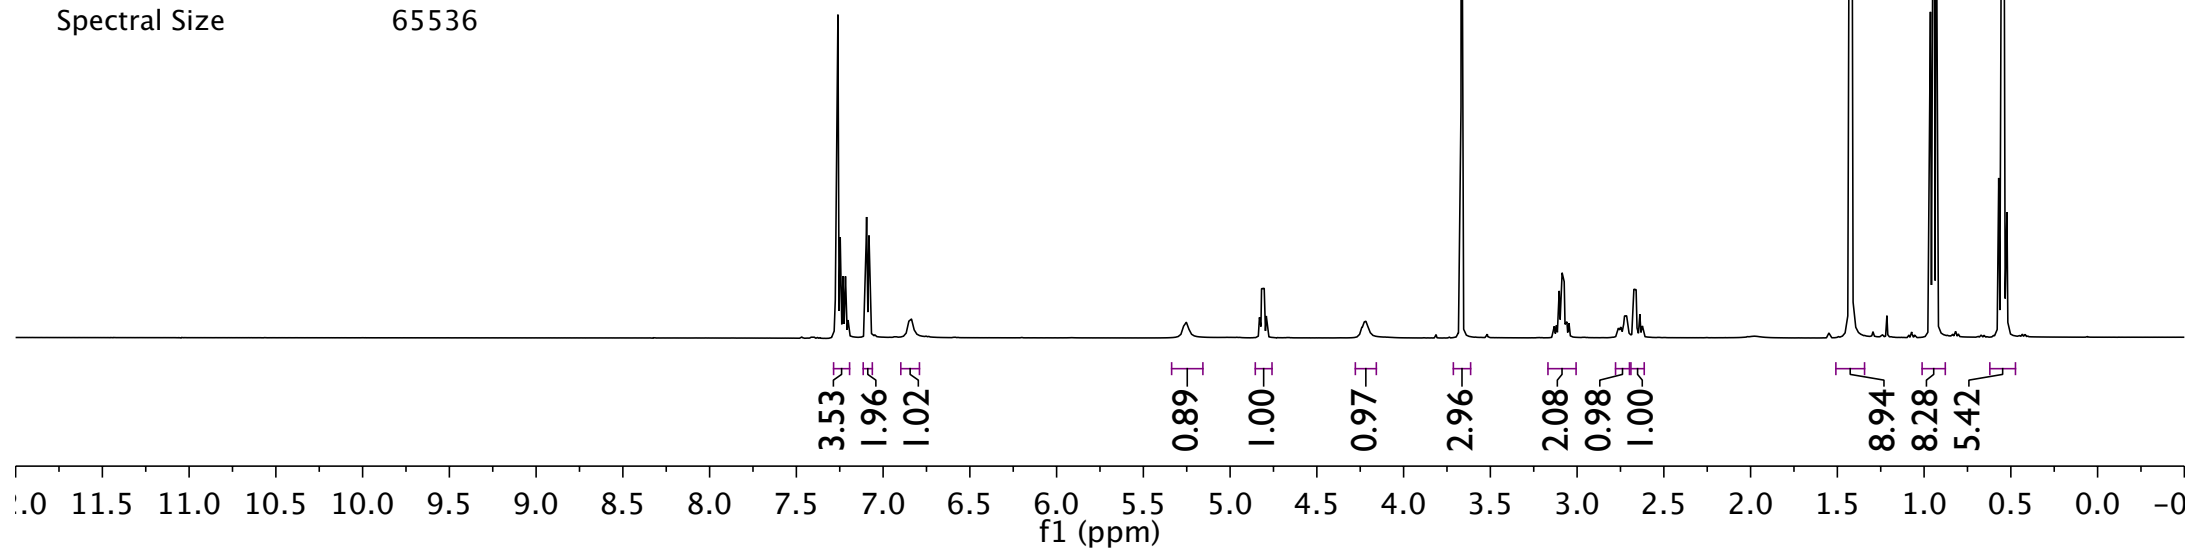

| Parameter              | Value                                                                     |
|------------------------|---------------------------------------------------------------------------|
| Data File Name         | / Volumes/ data/ indy/ mkieffer/ vnmsys/ data/ MEK6023/ CARBON01.fid/ fid |
| Title                  | CARBON01                                                                  |
| Origin                 | Varian                                                                    |
| Solvent                | cdcl3                                                                     |
| Temperature            | 25.0                                                                      |
| Pulse Sequence         | s2pul                                                                     |
| Number of Scans        | 256                                                                       |
| Receiver Gain          | 30                                                                        |
| Relaxation Delay       | 1.0000                                                                    |
| Pulse Width            | 4.2500                                                                    |
| Acquisition Time       | 1.0420                                                                    |
| Acquisition Date       | 2013-09-02T21:18:28                                                       |
| Spectrometer Frequency | 125.66                                                                    |
| Spectral Width         | 31446.5                                                                   |
| Lowest Frequency       | -1891.4                                                                   |
| Nucleus                | 13C                                                                       |
| Acquired Size          | 32768                                                                     |
| Spectral Size          | 65536                                                                     |

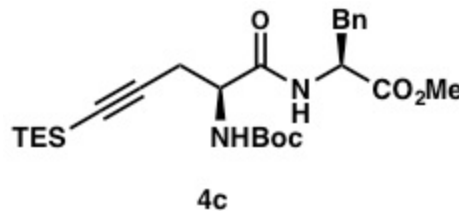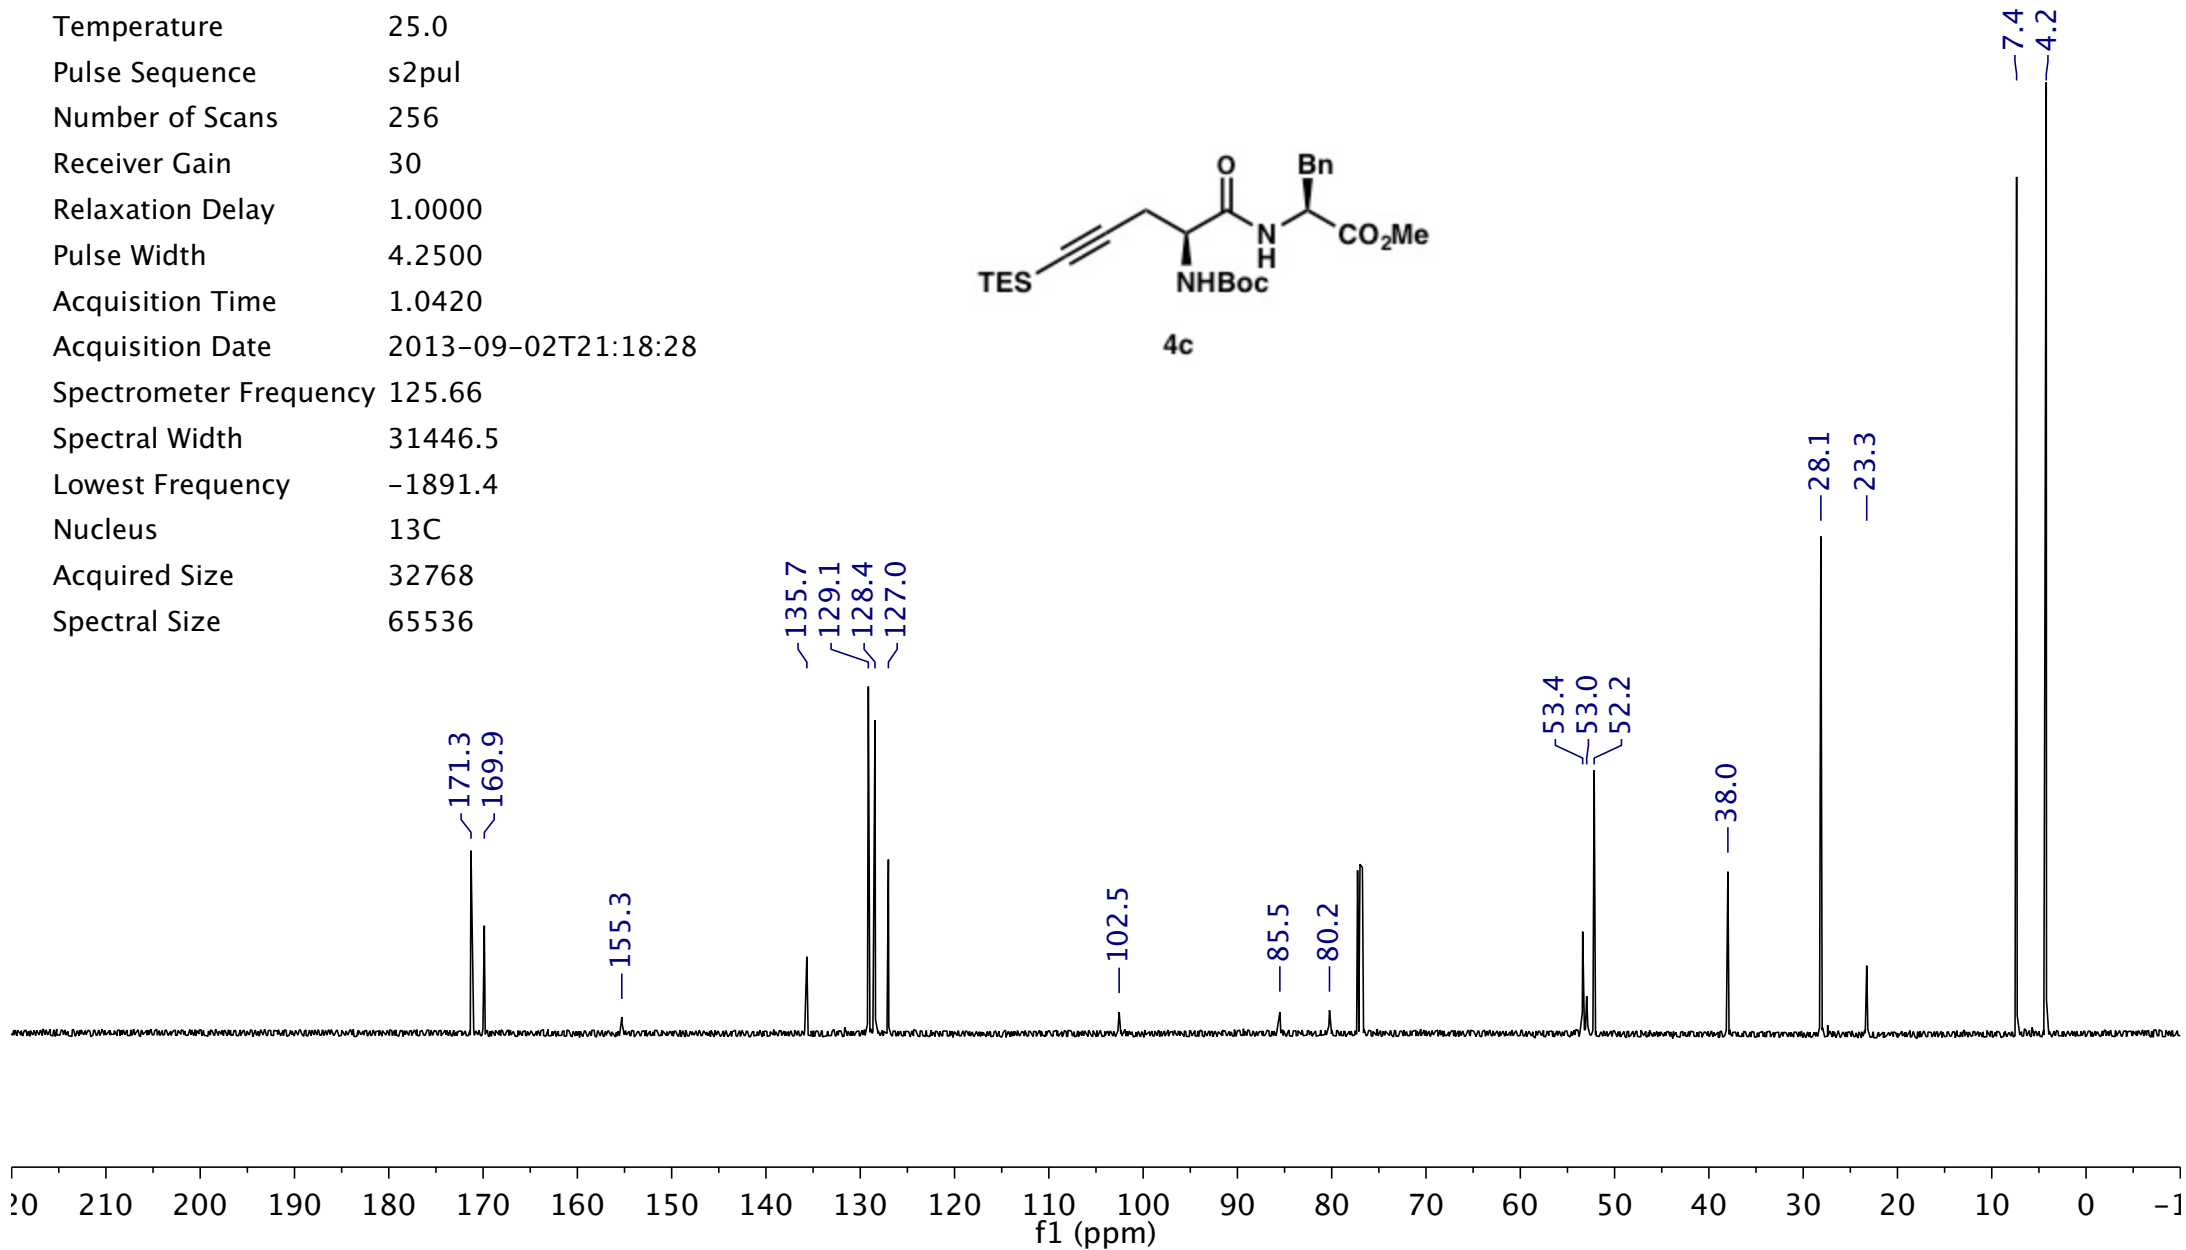



7.44  
7.42  
4.61  
4.60  
4.59  
4.58  
4.58  
4.57  
3.90  
3.90  
3.89  
3.88  
3.72  
3.71  
3.69  
2.83  
2.82  
2.79  
2.78  
2.75  
2.74  
2.72  
2.71  
2.10  
2.09  
2.08  
2.08  
2.07  
2.06  
2.05  
2.05  
2.04  
2.03  
1.95  
1.94  
1.94  
1.93  
1.93  
0.99  
0.98  
0.97  
0.97  
0.96  
0.95  
0.94  
0.83  
0.81  
0.60  
0.59  
0.58  
0.57  
0.57  
0.56  
0.56  
0.55  
0.55  
0.54  
0.53

| Parameter              | Value                                                                     |
|------------------------|---------------------------------------------------------------------------|
| Data File Name         | / Volumes/ data/ indy/ mkieffer/ vnmsys/ data/ MEK6221/ PROTON01.fid/ fid |
| Title                  | PROTON01                                                                  |
| Origin                 | Varian                                                                    |
| Solvent                | cd3cn                                                                     |
| Temperature            | 25.0                                                                      |
| Pulse Sequence         | s2pul                                                                     |
| Number of Scans        | 32                                                                        |
| Receiver Gain          | 16                                                                        |
| Relaxation Delay       | 5.0000                                                                    |
| Pulse Width            | 4.9500                                                                    |
| Acquisition Time       | 3.0000                                                                    |
| Acquisition Date       | 2014-07-11T03:02:01                                                       |
| Spectrometer Frequency | 499.69                                                                    |
| Spectral Width         | 8000.0                                                                    |
| Lowest Frequency       | -1019.8                                                                   |
| Nucleus                | 1H                                                                        |
| Acquired Size          | 24000                                                                     |
| Spectral Size          | 65536                                                                     |

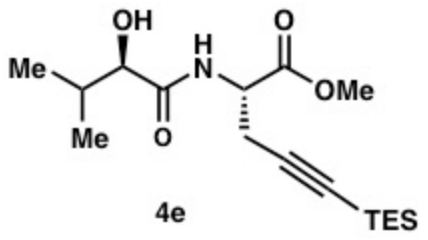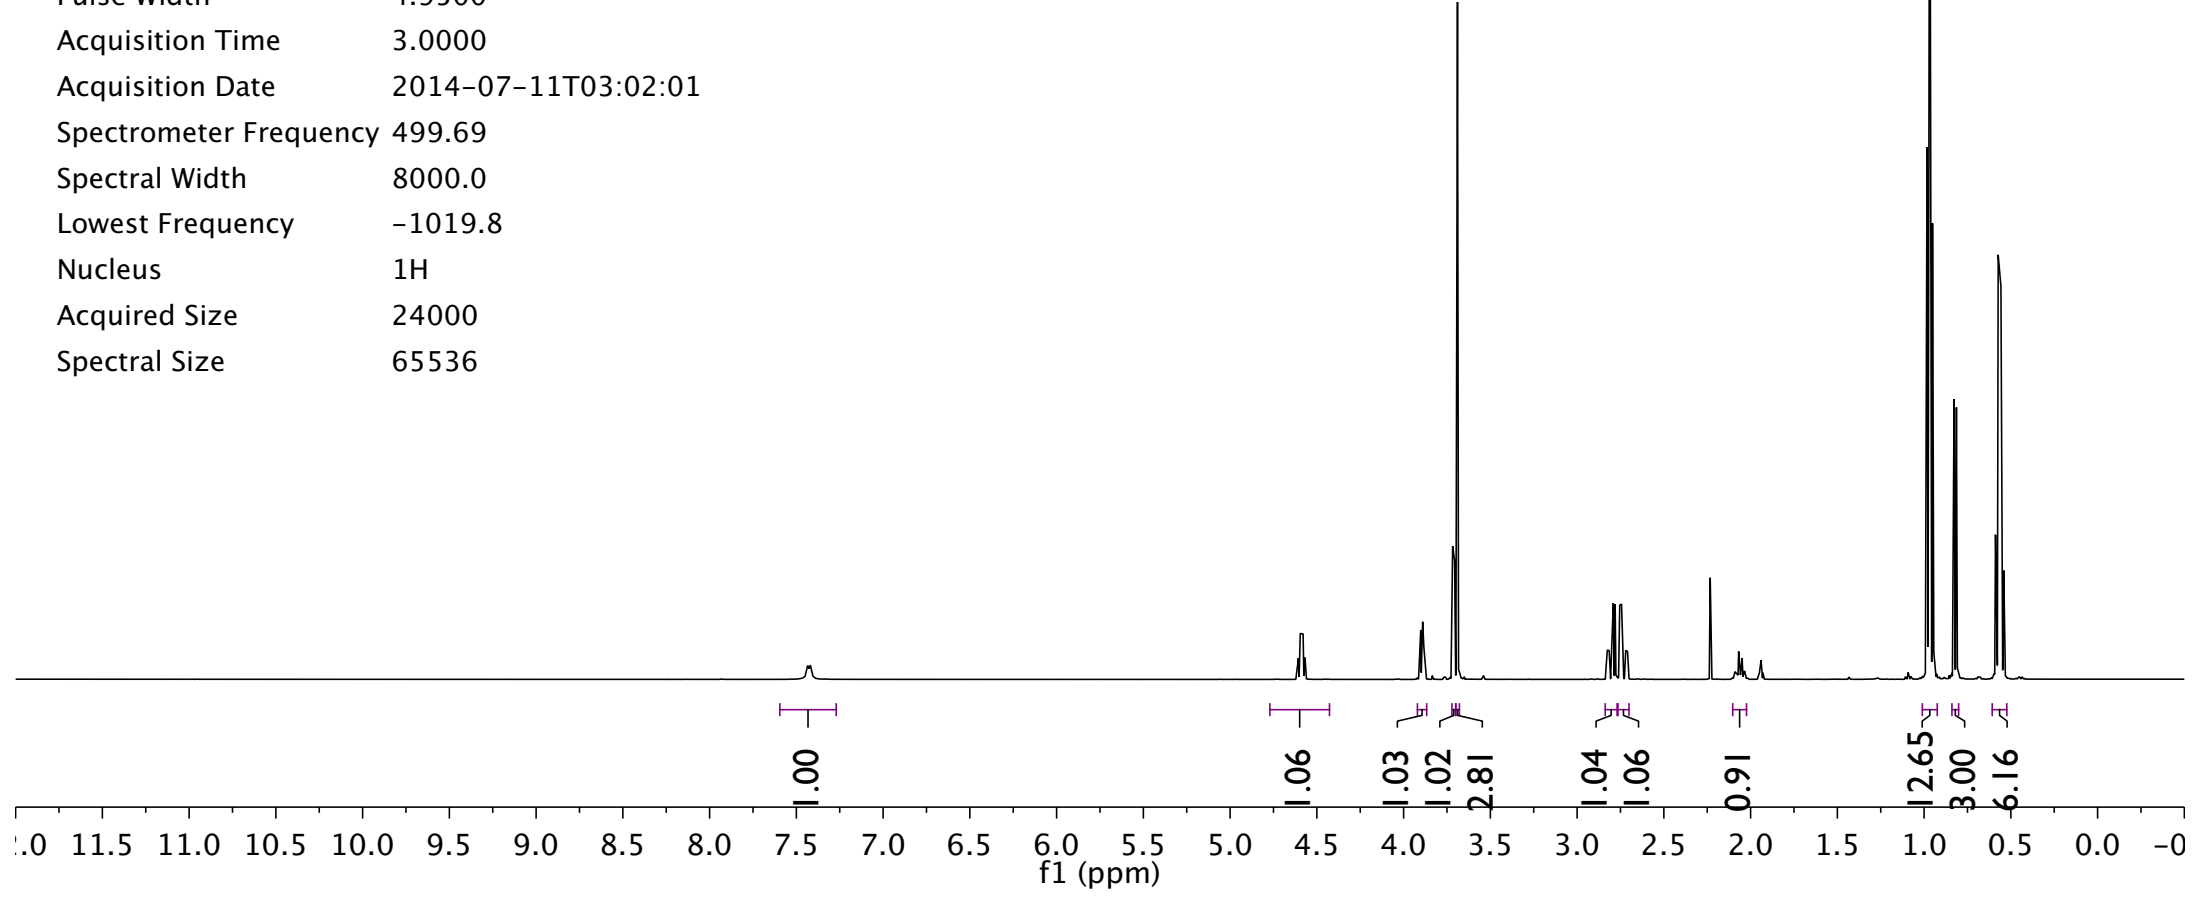

| Parameter              | Value                                                                      |
|------------------------|----------------------------------------------------------------------------|
| Data File Name         | / Volumes/ data/ indy/ mkieffer/ vnmrsys/ data/ MEK6221/ CARBON01.fid/ fid |
| Title                  | CARBON01                                                                   |
| Origin                 | Varian                                                                     |
| Solvent                | cd3cn                                                                      |
| Temperature            | 25.0                                                                       |
| Pulse Sequence         | s2pul                                                                      |
| Number of Scans        | 2000                                                                       |
| Receiver Gain          | 30                                                                         |
| Relaxation Delay       | 1.0000                                                                     |
| Pulse Width            | 4.2500                                                                     |
| Acquisition Time       | 1.0420                                                                     |
| Acquisition Date       | 2014-07-11T03:06:40                                                        |
| Spectrometer Frequency | 125.66                                                                     |
| Spectral Width         | 31446.5                                                                    |
| Lowest Frequency       | -1781.9                                                                    |
| Nucleus                | <sup>13</sup> C                                                            |
| Acquired Size          | 32768                                                                      |
| Spectral Size          | 65536                                                                      |

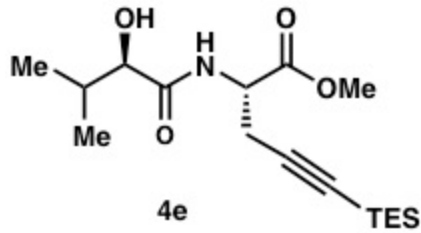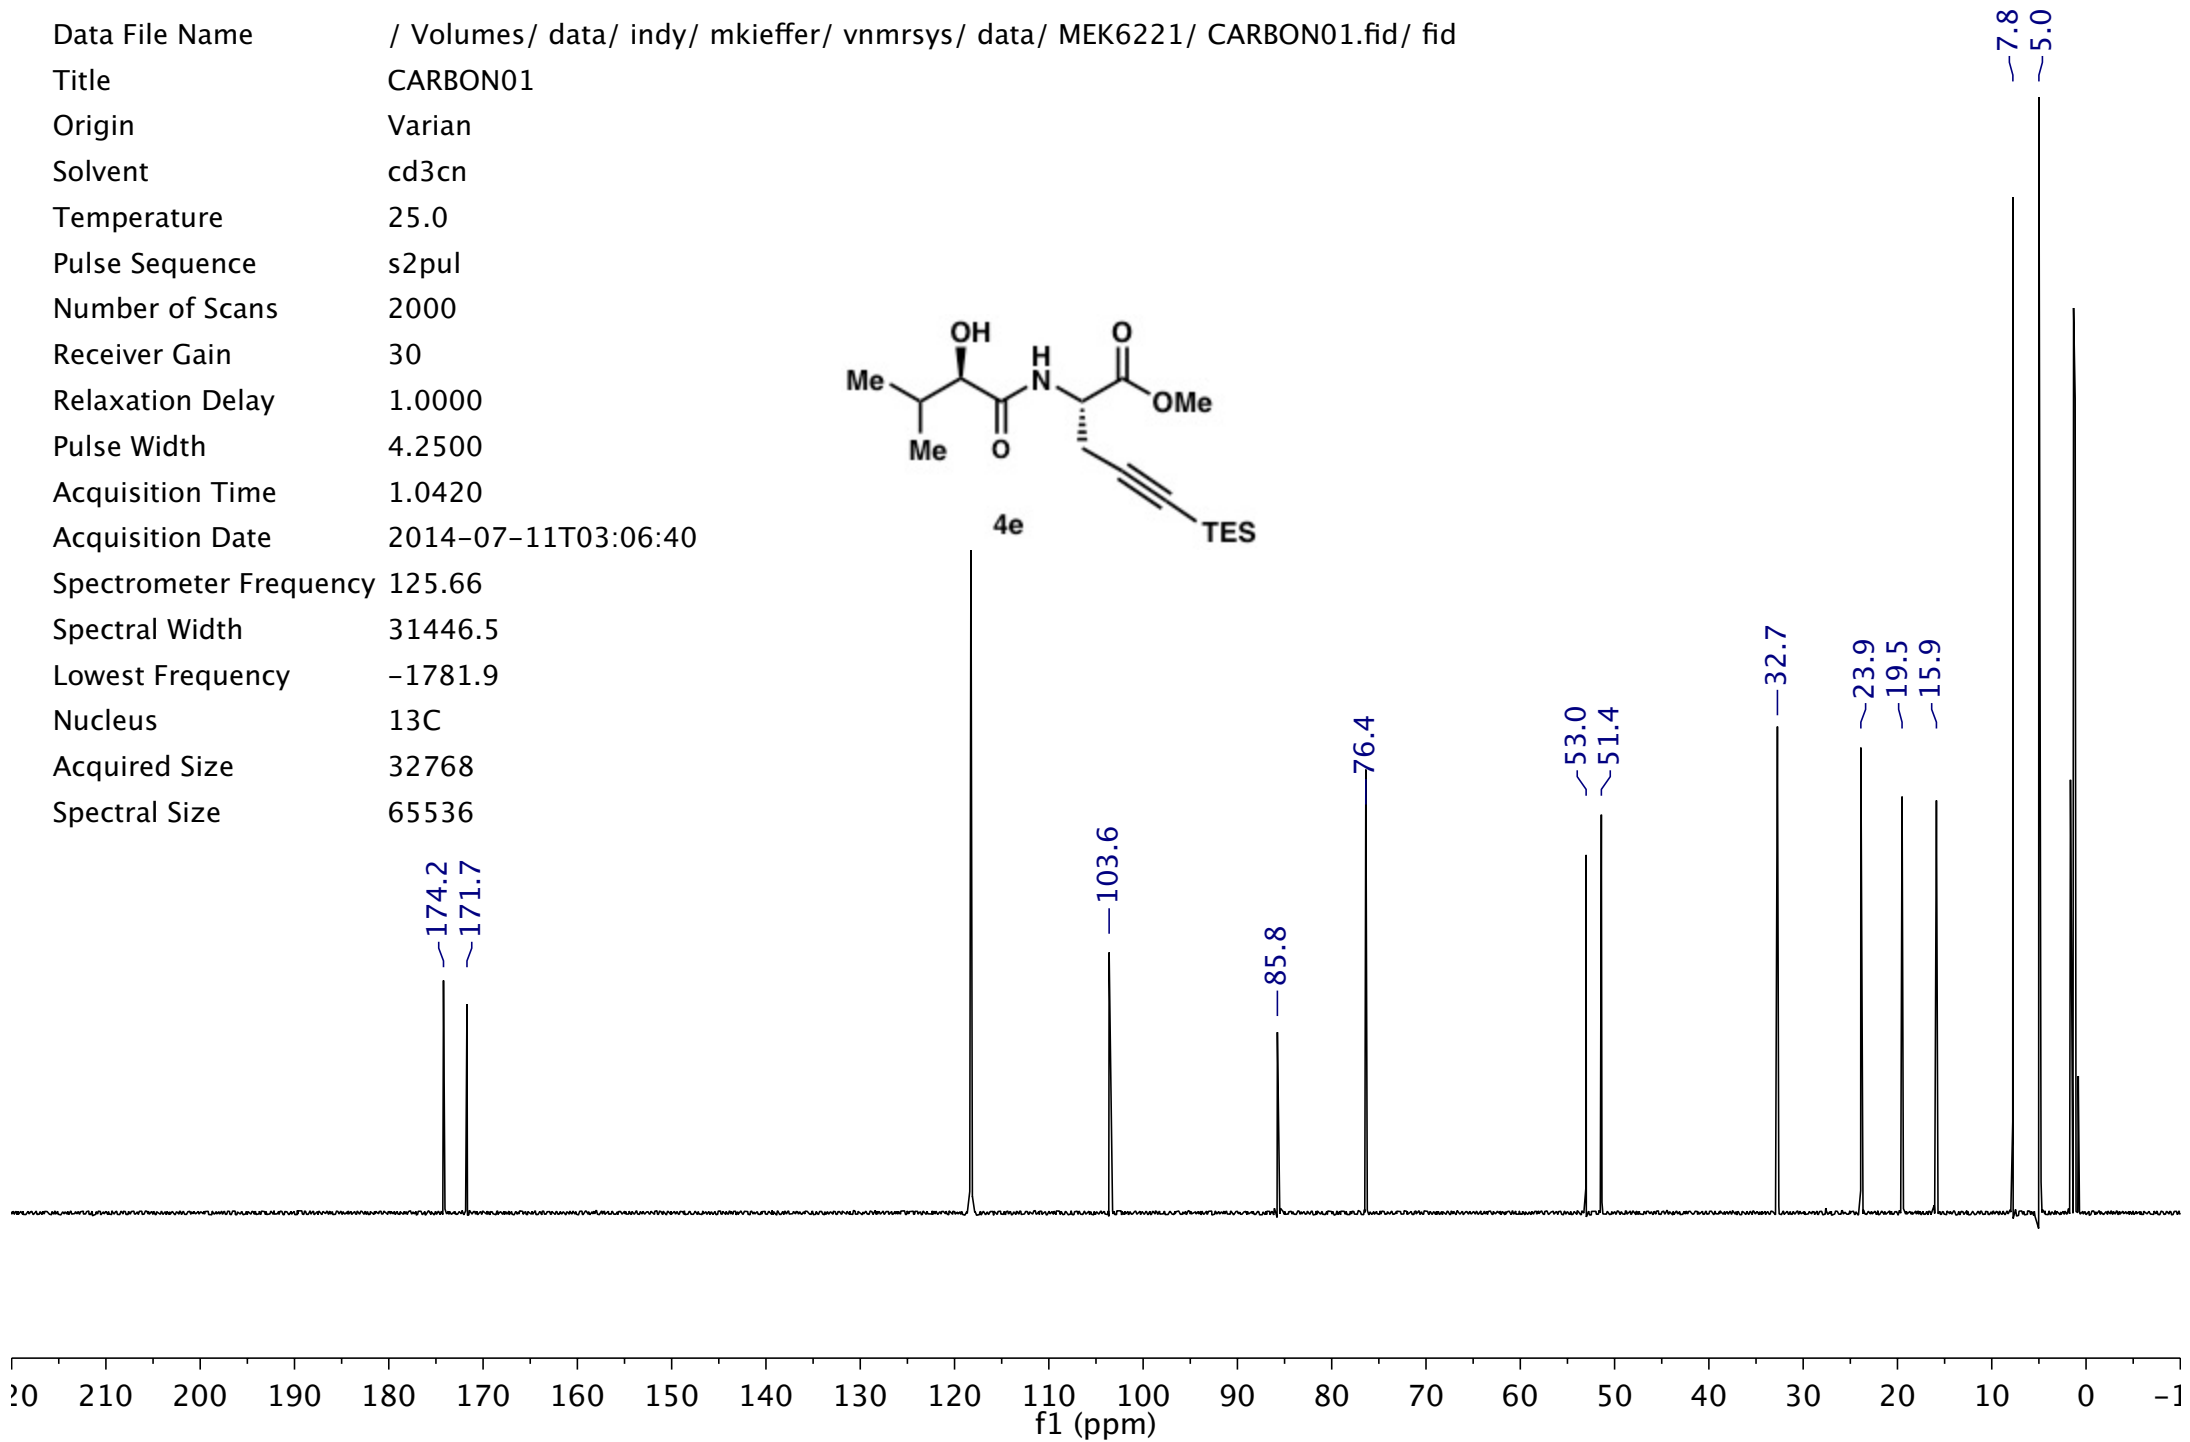

8.04 7.58 7.56 7.36 7.35 7.19 7.19 7.18 7.18 7.17 7.16 7.16 7.11 7.09 7.08 4.94 4.92 4.59 4.58 4.56 4.55 3.68 3.63 3.32 3.31 3.29 3.28 3.26 3.25 3.23 1.36 1.20 1.03 1.03 1.03 1.02 1.01 1.01 1.01 1.00 1.00 1.00 0.96 0.95 0.95 0.94 0.94 0.93 0.92 0.92 0.92 0.91 0.90

Parameter Value

Data File Name / Volumes/ data/ indy/ mkieffer/ vnmrsys/ data/ MEK6060-D/ PROTON02.fid/ fid

Title PROTON02

Origin Varian

Solvent cdcl3

Temperature 25.0

Pulse Sequence s2pul

Number of Scans 32

Receiver Gain 20

Relaxation Delay 5.0000

Pulse Width 4.9500

Acquisition Time 3.0000

Acquisition Date 2013-09-02T20:11:48

Spectrometer Frequency 499.70

Spectral Width 8000.0

Lowest Frequency -1004.3

Nucleus 1H

Acquired Size 24000

Spectral Size 65536

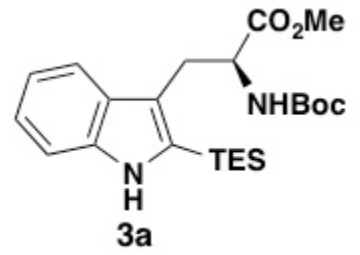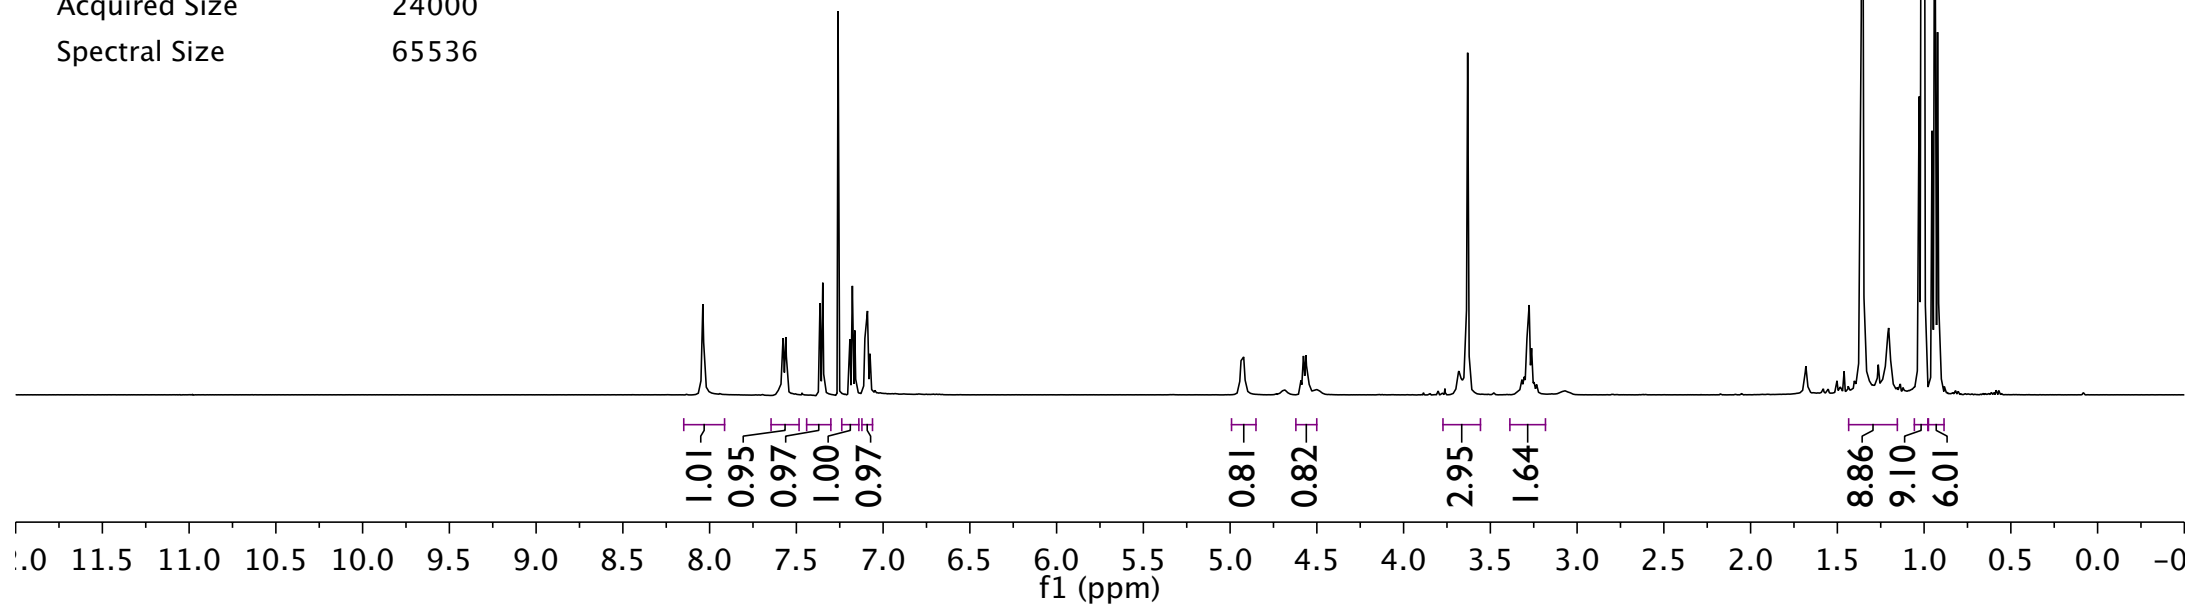

| Parameter              | Value                                                                        |
|------------------------|------------------------------------------------------------------------------|
| Data File Name         | / Volumes/ data/ indy/ mkieffer/ vnmrsys/ data/ MEK6060-D/ CARBON01.fid/ fid |
| Title                  | CARBON01                                                                     |
| Origin                 | Varian                                                                       |
| Solvent                | cdcl3                                                                        |
| Temperature            | 25.0                                                                         |
| Pulse Sequence         | s2pul                                                                        |
| Number of Scans        | 256                                                                          |
| Receiver Gain          | 30                                                                           |
| Relaxation Delay       | 1.0000                                                                       |
| Pulse Width            | 4.2500                                                                       |
| Acquisition Time       | 1.0420                                                                       |
| Acquisition Date       | 2013-09-02T20:16:19                                                          |
| Spectrometer Frequency | 125.66                                                                       |
| Spectral Width         | 31446.5                                                                      |
| Lowest Frequency       | -1887.1                                                                      |
| Nucleus                | <sup>13</sup> C                                                              |
| Acquired Size          | 32768                                                                        |
| Spectral Size          | 65536                                                                        |

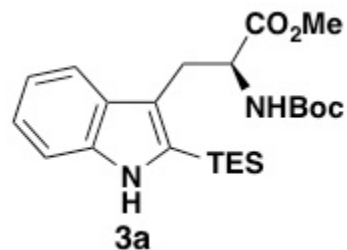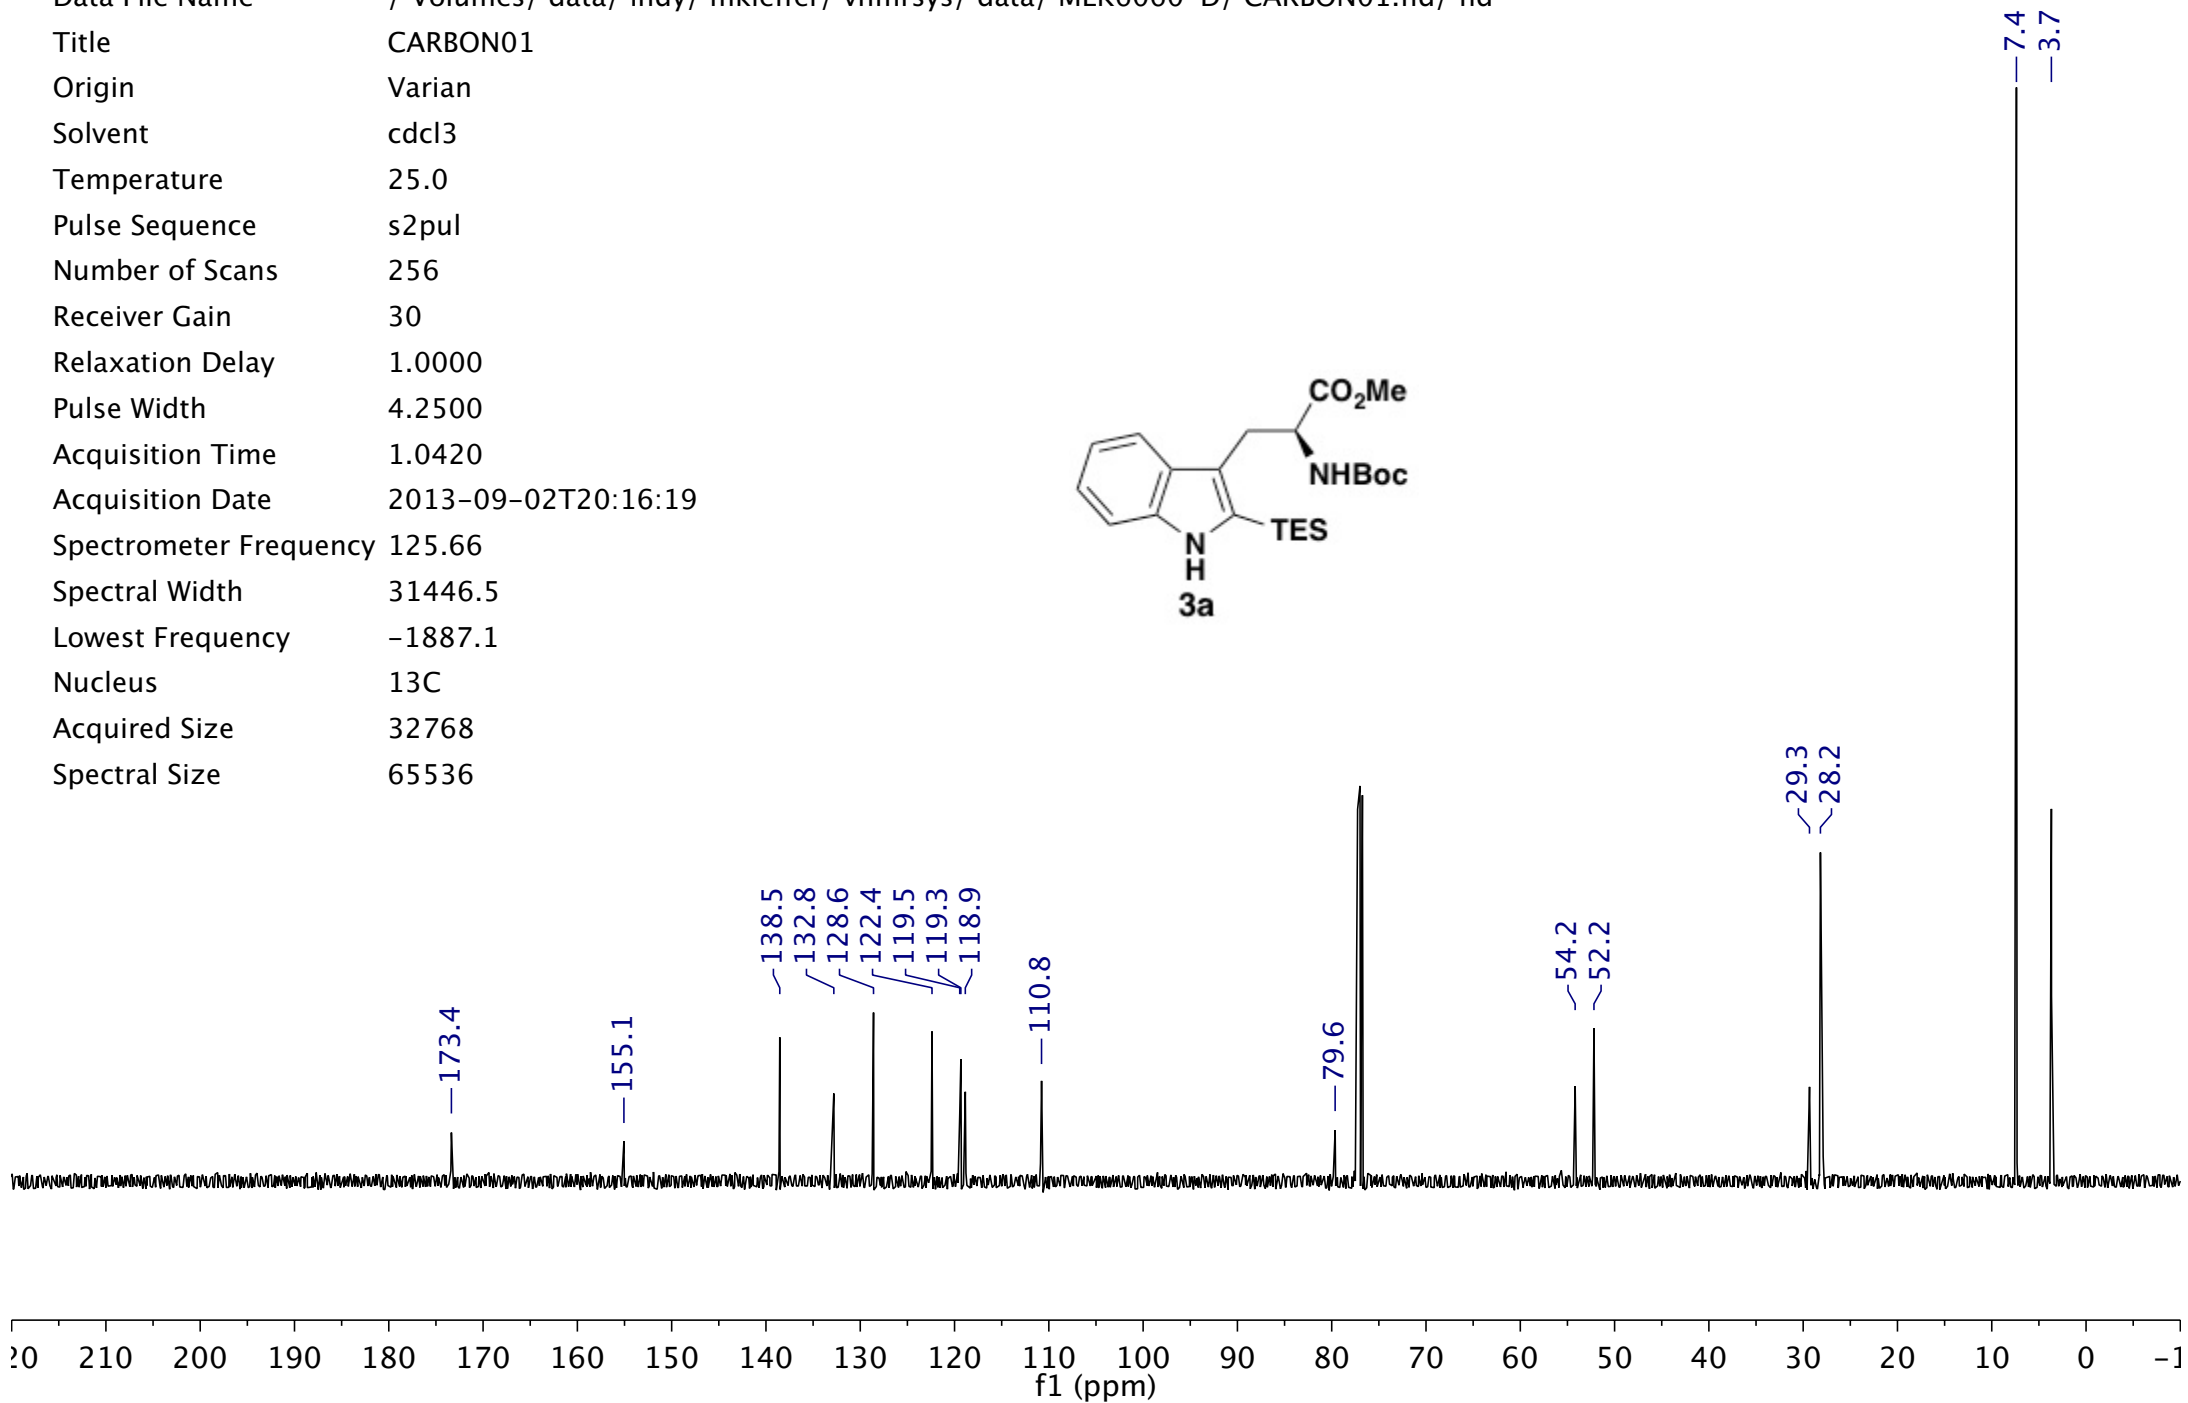

| Parameter | Value |
|-----------|-------|
| 7.76      |       |
| 7.75      |       |
| 7.62      |       |
| 7.62      |       |
| 7.60      |       |
| 7.60      |       |
| 7.36      |       |
| 7.36      |       |
| 7.35      |       |
| 7.35      |       |
| 7.34      |       |
| 7.33      |       |
| 7.33      |       |
| 7.28      |       |
| 7.28      |       |
| 7.27      |       |
| 7.27      |       |
| 7.26      |       |
| 7.25      |       |
| 7.25      |       |
| 5.58      |       |
| 5.56      |       |
| 4.42      |       |
| 4.40      |       |
| 4.39      |       |
| 4.37      |       |
| 3.54      |       |
| 3.39      |       |
| 3.38      |       |
| 3.36      |       |
| 3.35      |       |
| 3.22      |       |
| 3.20      |       |
| 3.19      |       |
| 3.17      |       |
| 2.78      |       |
| 2.78      |       |
| 1.29      |       |
| 1.28      |       |
| 0.98      |       |
| 0.98      |       |
| 0.97      |       |
| 0.97      |       |
| 0.96      |       |
| 0.96      |       |
| 0.95      |       |
| 0.95      |       |
| 0.94      |       |
| 0.94      |       |
| 0.94      |       |
| 0.94      |       |
| 0.93      |       |
| 0.93      |       |
| 0.92      |       |
| 0.92      |       |
| 0.91      |       |
| 0.91      |       |
| 0.91      |       |
| 0.90      |       |
| 0.90      |       |
| 0.90      |       |
| 0.89      |       |
| 0.89      |       |

Data File Name / Volumes/ data/ indy/ mkieffer/ vnmrsys/ data/ MEK6140-B/ PROTON02.fid/ fid  
 Title PROTON02  
 Origin Varian  
 Solvent cd3cn  
 Temperature 25.0  
 Pulse Sequence s2pul  
 Number of Scans 8  
 Receiver Gain 16  
 Relaxation Delay 1.0000  
 Pulse Width 4.9500  
 Acquisition Time 3.0000  
 Acquisition Date 2014-01-12T19:04:14  
 Spectrometer Frequency 499.70  
 Spectral Width 8000.0  
 Lowest Frequency -1016.3  
 Nucleus 1H  
 Acquired Size 24000  
 Spectral Size 65536

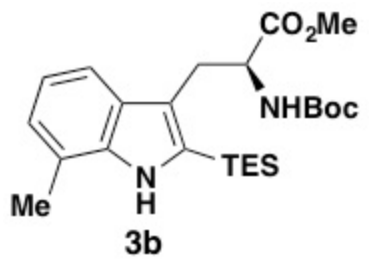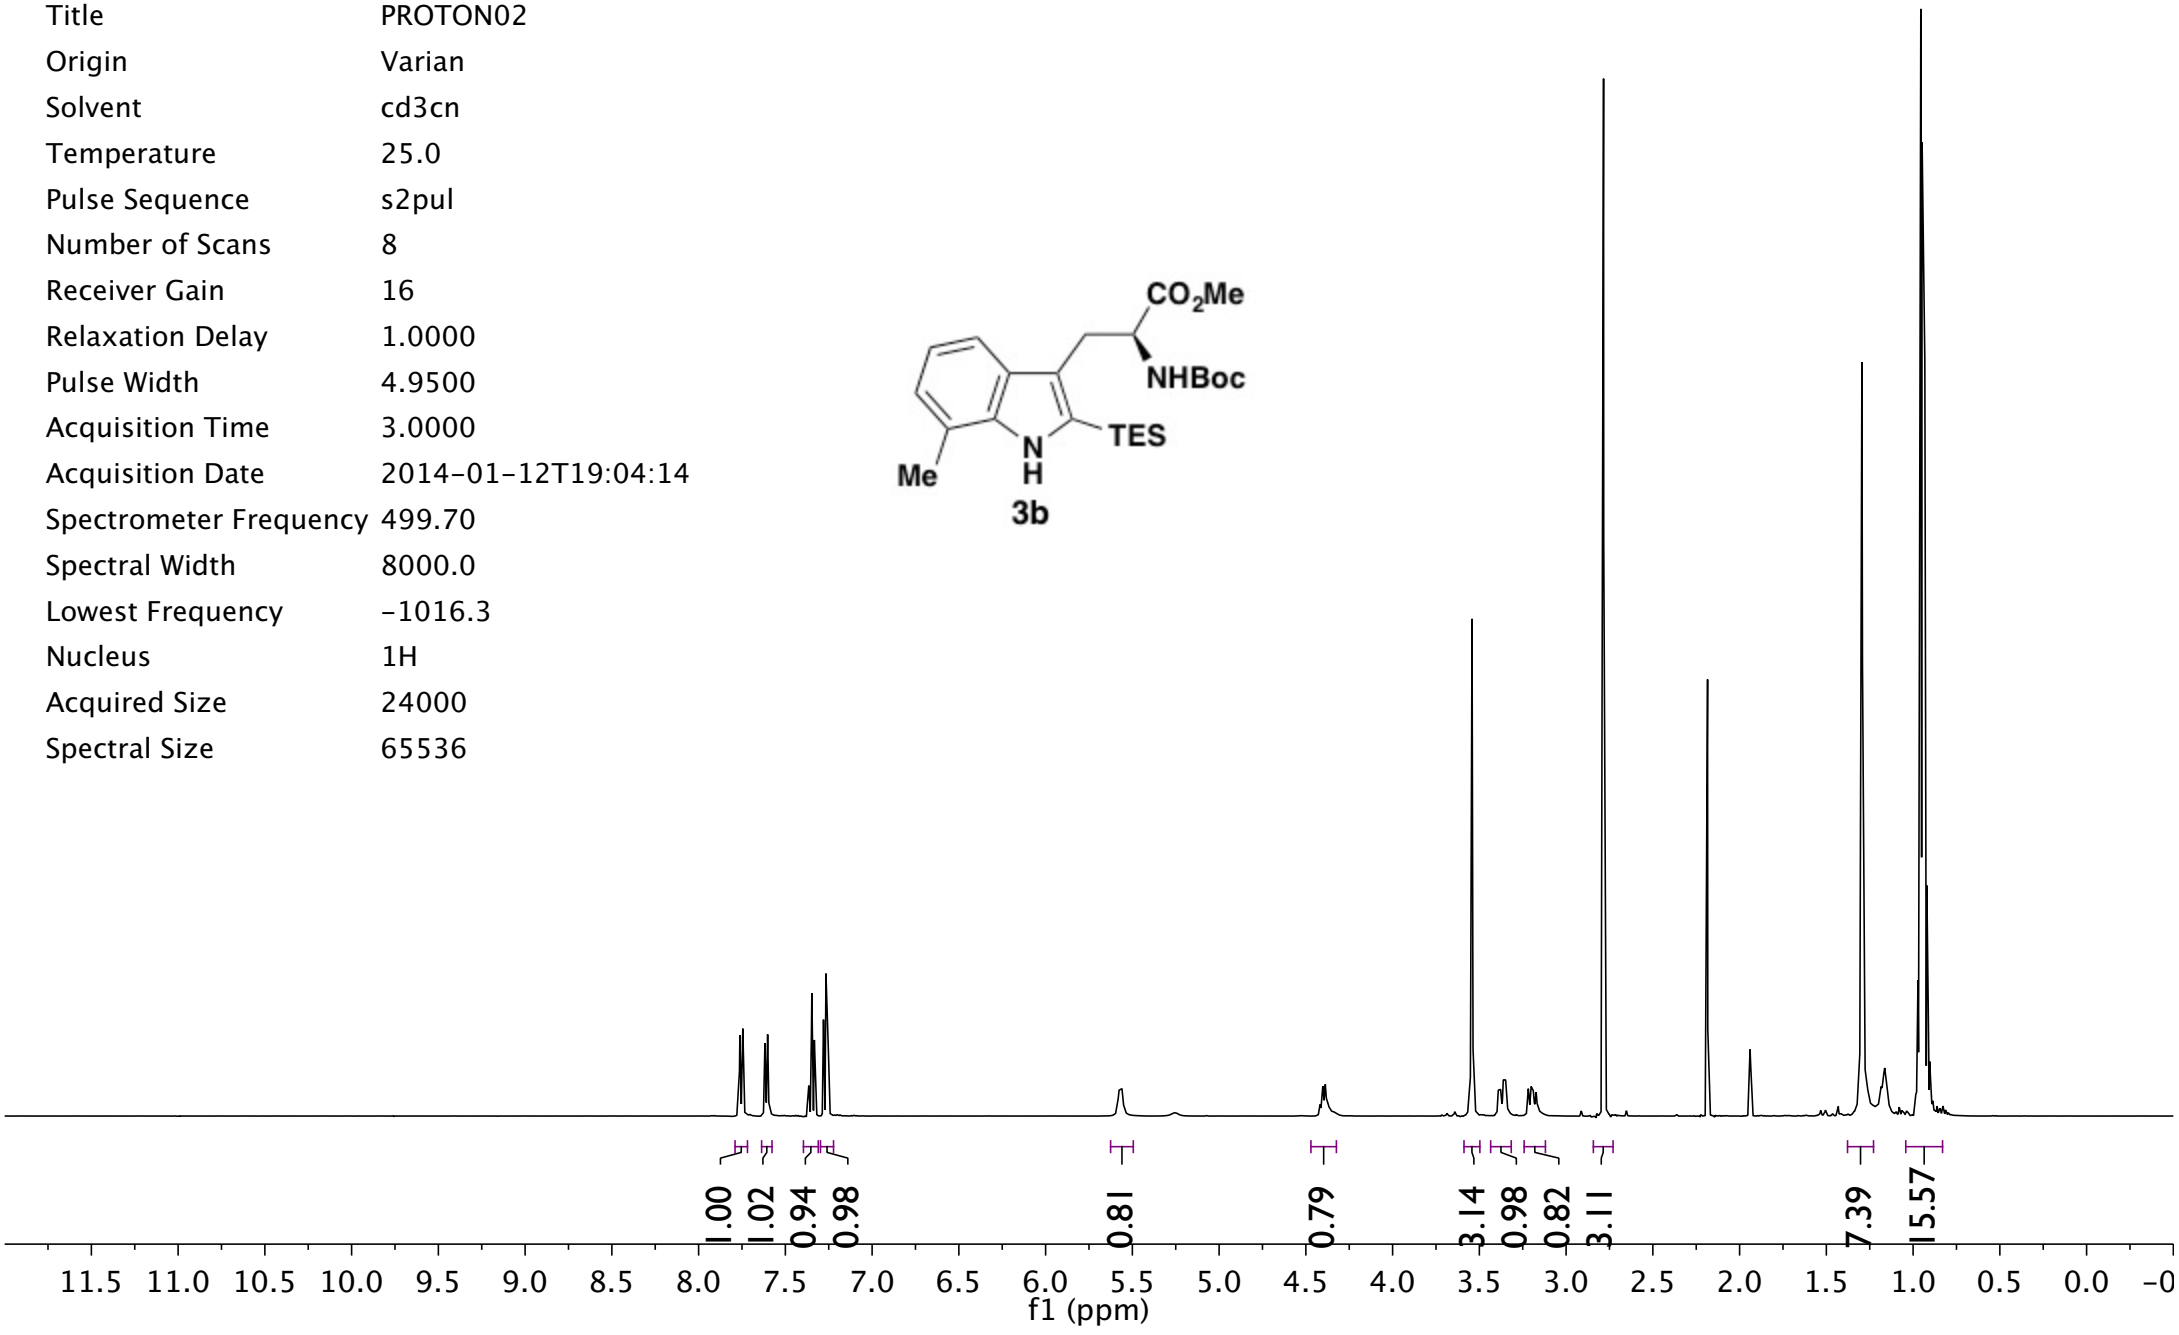

| Parameter              | Value                                                                       |
|------------------------|-----------------------------------------------------------------------------|
| Data File Name         | / Volumes/ data/ indy/ mkieffer/ vnmsys/ data/ MEK6140-B/ CARBON01.fid/ fid |
| Title                  | CARBON01                                                                    |
| Origin                 | Varian                                                                      |
| Solvent                | cd3cn                                                                       |
| Temperature            | 25.0                                                                        |
| Pulse Sequence         | s2pul                                                                       |
| Number of Scans        | 512                                                                         |
| Receiver Gain          | 30                                                                          |
| Relaxation Delay       | 1.0000                                                                      |
| Pulse Width            | 4.2500                                                                      |
| Acquisition Time       | 1.0420                                                                      |
| Acquisition Date       | 2014-01-12T19:05:10                                                         |
| Spectrometer Frequency | 125.66                                                                      |
| Spectral Width         | 31446.5                                                                     |
| Lowest Frequency       | -1781.9                                                                     |
| Nucleus                | <sup>13</sup> C                                                             |
| Acquired Size          | 32768                                                                       |
| Spectral Size          | 65536                                                                       |

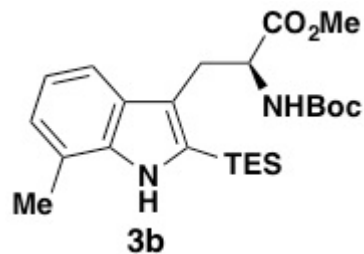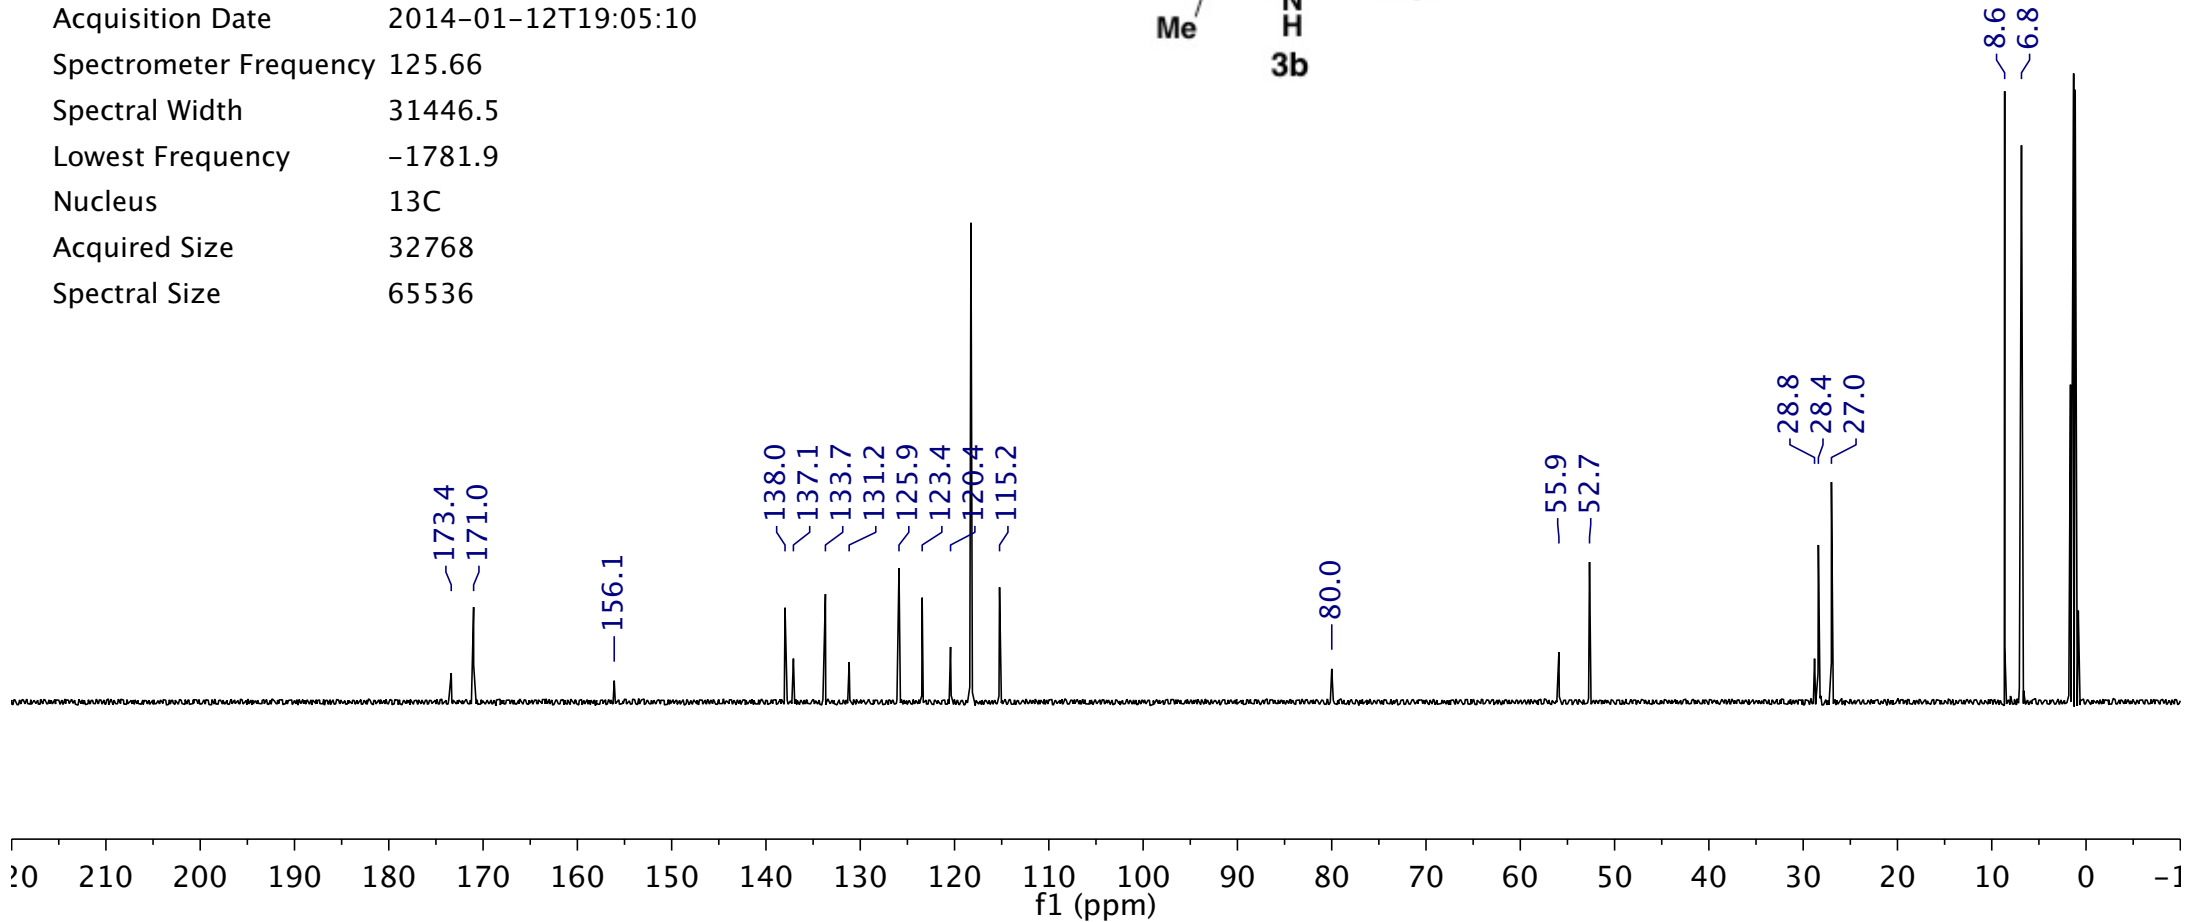

9.21  
8.32  
7.31  
7.31  
7.29  
7.29  
7.09  
7.07  
7.07  
7.05  
6.94  
6.92  
5.54  
4.36  
4.34  
4.34  
4.34  
4.33  
4.33  
4.32  
4.31  
3.59  
3.38  
3.37  
3.35  
3.34  
3.03  
3.02  
3.00  
3.00  
2.22  
2.13  
1.31  
1.29  
1.21  
1.18  
1.16  
1.16  
1.15  
1.15  
1.00  
1.00  
0.99  
0.99  
0.98  
0.98  
0.97  
0.97  
0.97  
0.96  
0.95  
0.95  
0.94  
0.94  
0.94  
0.93  
0.93  
0.93  
0.92  
0.92  
0.92  
0.91  
0.91  
0.90  
0.90

| Parameter              | Value                                                                        |
|------------------------|------------------------------------------------------------------------------|
| Data File Name         | / Volumes/ data/ indy/ mkieffer/ vnmrsys/ data/ MEK6266-A/ PROTON02.fid/ fid |
| Title                  | PROTON02                                                                     |
| Origin                 | Varian                                                                       |
| Solvent                | cd3cn                                                                        |
| Temperature            | 25.0                                                                         |
| Pulse Sequence         | s2pul                                                                        |
| Number of Scans        | 32                                                                           |
| Receiver Gain          | 24                                                                           |
| Relaxation Delay       | 5.0000                                                                       |
| Pulse Width            | 5.9000                                                                       |
| Acquisition Time       | 3.0000                                                                       |
| Acquisition Date       | 2015-03-01T13:44:05                                                          |
| Spectrometer Frequency | 499.68                                                                       |
| Spectral Width         | 8000.0                                                                       |
| Lowest Frequency       | -1039.5                                                                      |
| Nucleus                | 1H                                                                           |
| Acquired Size          | 24000                                                                        |
| Spectral Size          | 65536                                                                        |

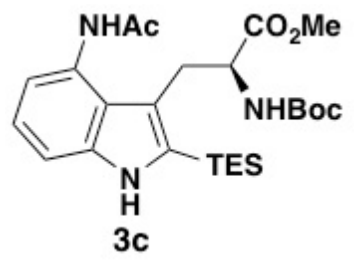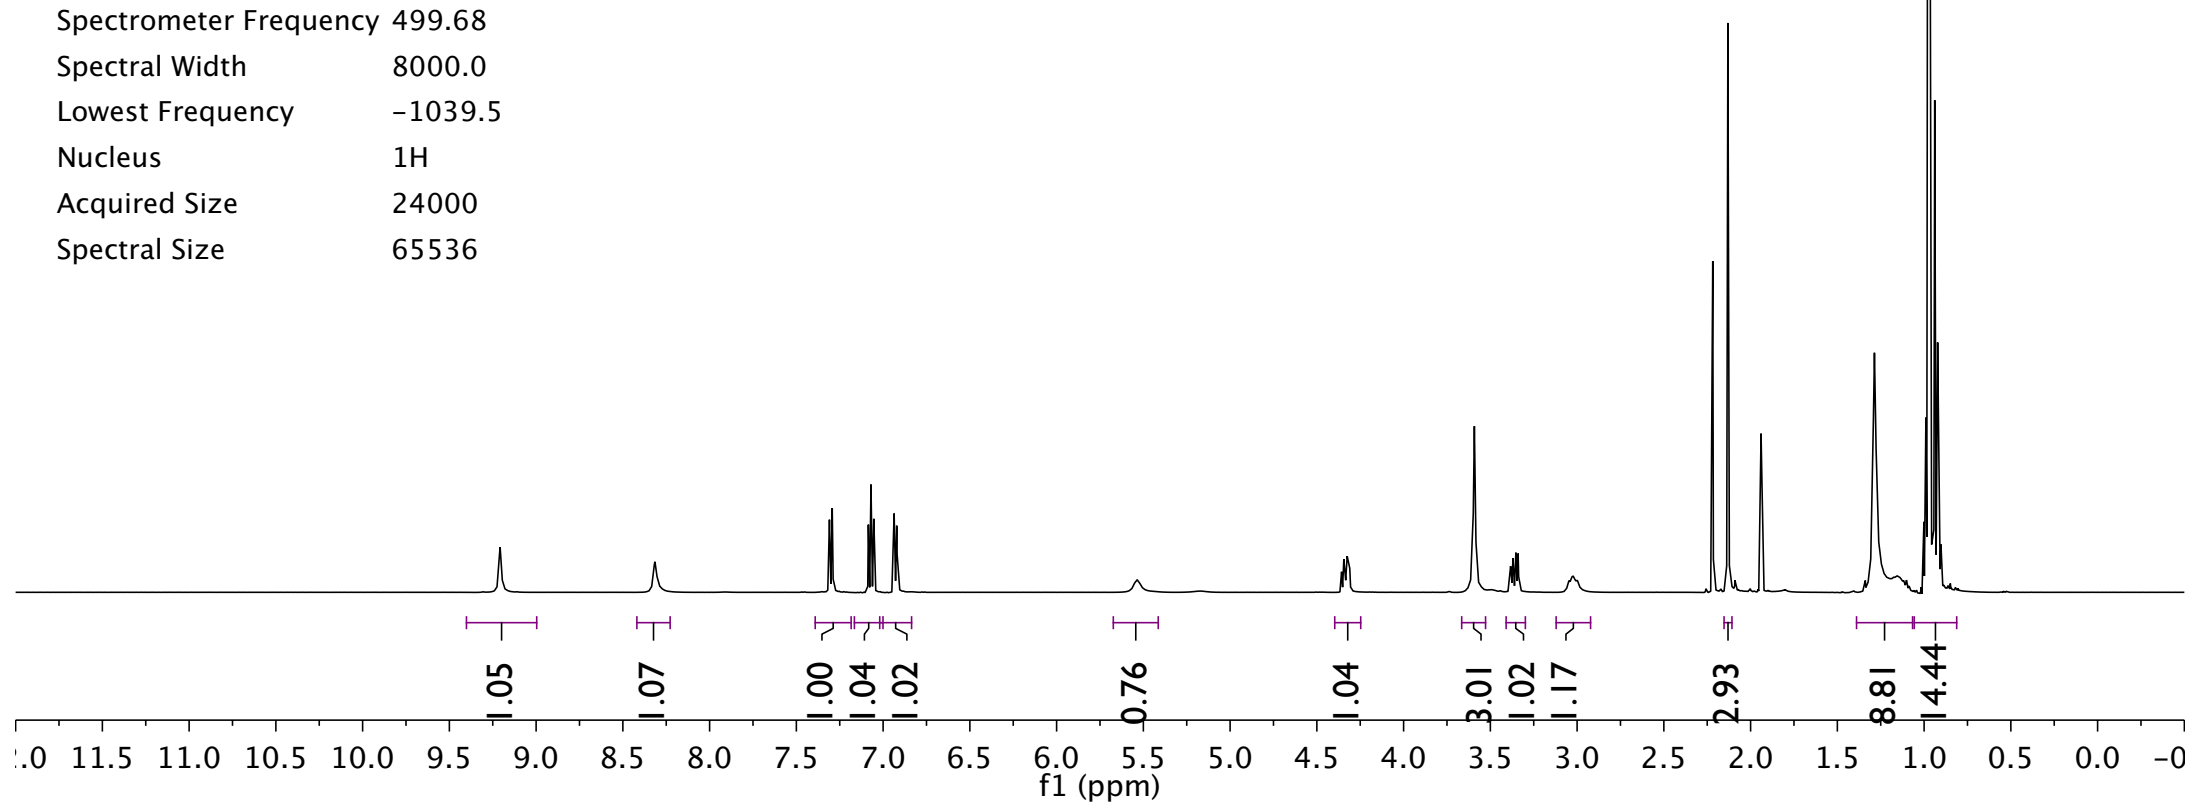

| Parameter              | Value                                                                        |
|------------------------|------------------------------------------------------------------------------|
| Data File Name         | / Volumes/ data/ indy/ mkieffer/ vnmrsys/ data/ MEK6266-A/ CARBON01.fid/ fid |
| Title                  | CARBON01                                                                     |
| Origin                 | Varian                                                                       |
| Solvent                | cd3cn                                                                        |
| Temperature            | 25.0                                                                         |
| Pulse Sequence         | s2pul                                                                        |
| Number of Scans        | 2000                                                                         |
| Receiver Gain          | 30                                                                           |
| Relaxation Delay       | 1.0000                                                                       |
| Pulse Width            | 4.2500                                                                       |
| Acquisition Time       | 1.0420                                                                       |
| Acquisition Date       | 2014-07-11T05:48:55                                                          |
| Spectrometer Frequency | 125.66                                                                       |
| Spectral Width         | 31446.5                                                                      |
| Lowest Frequency       | -1786.3                                                                      |
| Nucleus                | <sup>13</sup> C                                                              |
| Acquired Size          | 32768                                                                        |
| Spectral Size          | 65536                                                                        |

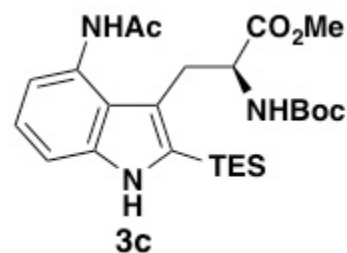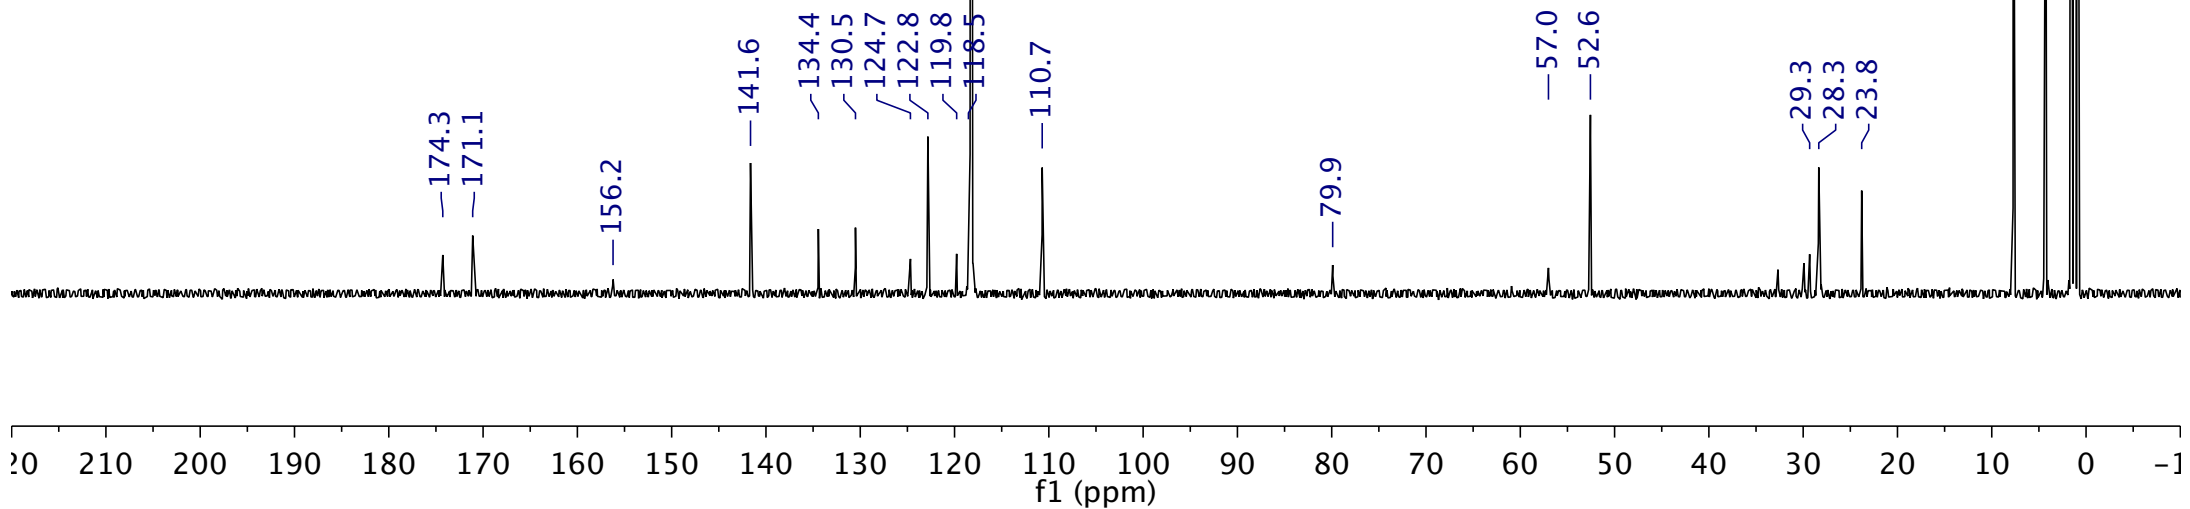



8.95  
7.29  
7.27  
7.03  
7.02  
6.78  
6.78  
6.76  
6.76  
5.54  
5.52  
4.38  
4.37  
4.36  
4.35  
4.35  
4.34  
3.82  
3.82  
3.60  
3.28  
3.27  
3.25  
3.24  
3.10  
3.08  
3.07  
3.06  
1.28  
1.27  
1.19  
1.00  
0.99  
0.99  
0.99  
0.99  
0.98  
0.98  
0.98  
0.98  
0.97  
0.97  
0.97  
0.96  
0.96  
0.96  
0.96  
0.96  
0.96  
0.95  
0.94  
0.94  
0.93  
0.93  
0.93  
0.93  
0.93  
0.92  
0.92  
0.92  
0.92  
0.91  
0.91  
0.91  
0.91  
0.90  
0.90  
0.89

Parameter

Value

Data File Name / Volumes/ data/ indy/ mkieffer/ vnmrsys/ data/ MEK6150-A/ PROTON01.fid/ fid  
 Title PROTON01  
 Origin Varian  
 Solvent cd3cn  
 Temperature 25.0  
 Pulse Sequence s2pul  
 Number of Scans 32  
 Receiver Gain 22  
 Relaxation Delay 5.0000  
 Pulse Width 4.9500  
 Acquisition Time 3.0000  
 Acquisition Date 2014-01-31T15:48:34  
 Spectrometer Frequency 499.70  
 Spectral Width 8000.0  
 Lowest Frequency -1016.3  
 Nucleus 1H  
 Acquired Size 24000  
 Spectral Size 65536

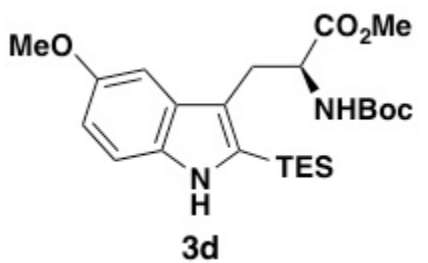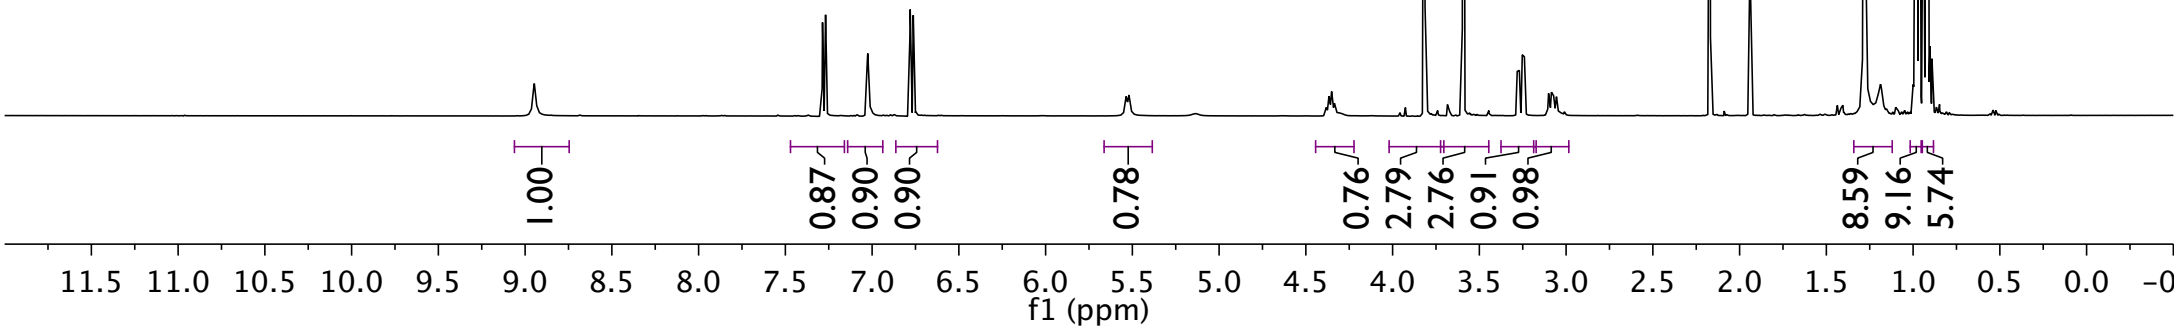

| Parameter              | Value                                                                        |
|------------------------|------------------------------------------------------------------------------|
| Data File Name         | / Volumes/ data/ indy/ mkieffer/ vnmrsys/ data/ MEK6150-A/ CARBON01.fid/ fid |
| Title                  | CARBON01                                                                     |
| Origin                 | Varian                                                                       |
| Solvent                | cd3cn                                                                        |
| Temperature            | 25.0                                                                         |
| Pulse Sequence         | s2pul                                                                        |
| Number of Scans        | 1000                                                                         |
| Receiver Gain          | 30                                                                           |
| Relaxation Delay       | 1.0000                                                                       |
| Pulse Width            | 4.2500                                                                       |
| Acquisition Time       | 1.0420                                                                       |
| Acquisition Date       | 2014-01-31T15:53:13                                                          |
| Spectrometer Frequency | 125.66                                                                       |
| Spectral Width         | 31446.5                                                                      |
| Lowest Frequency       | -1784.4                                                                      |
| Nucleus                | <sup>13</sup> C                                                              |
| Acquired Size          | 32768                                                                        |
| Spectral Size          | 65536                                                                        |

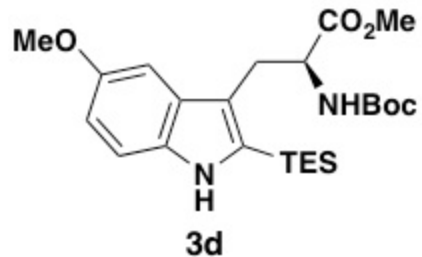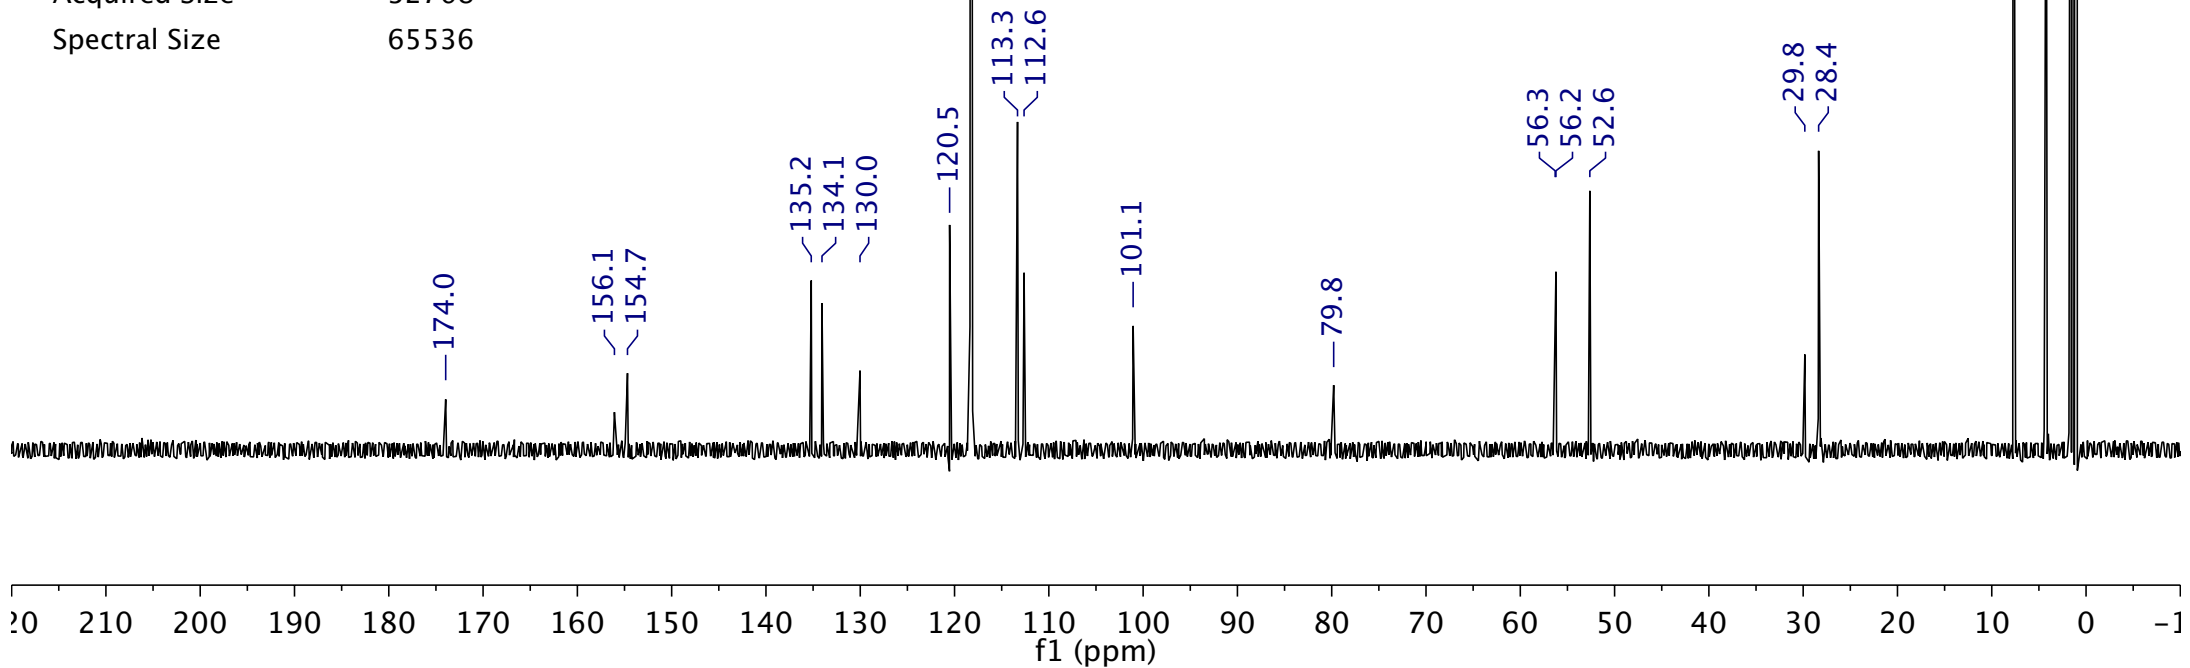

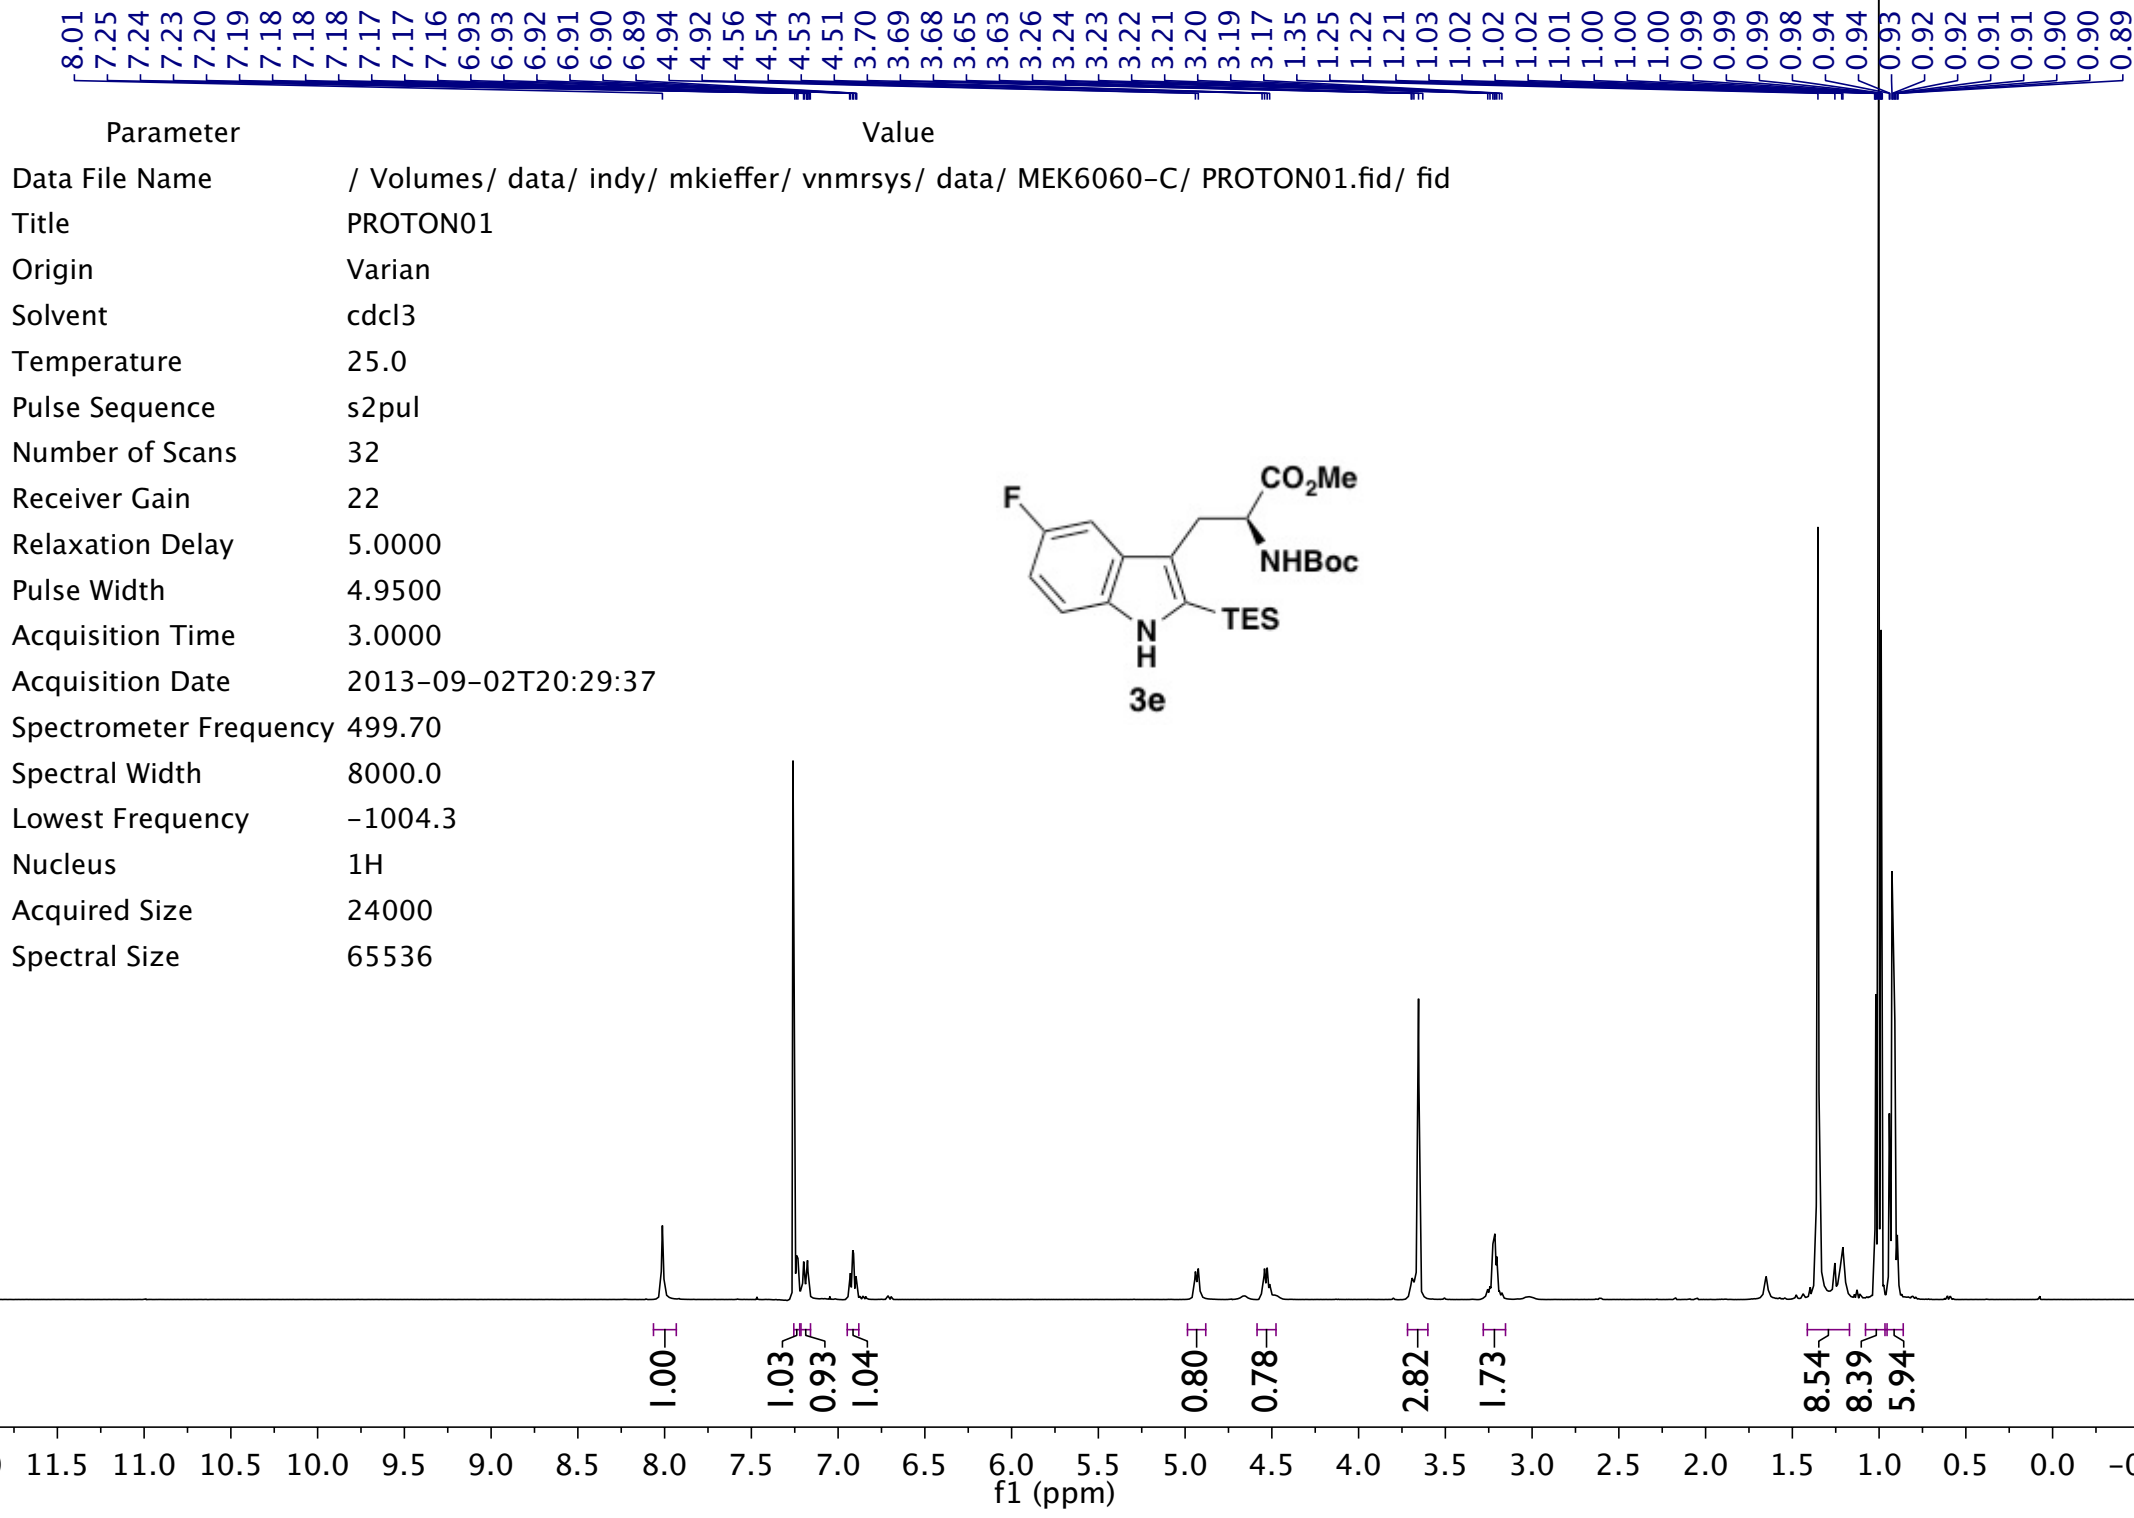

Parameter Value

Data File Name / Volumes/ data/ indy/ mkieffer/ vnmrsys/ data/ MEK6060-C/ PROTON01.fid/ fid

Title PROTON01

Origin Varian

Solvent cdcl3

Temperature 25.0

Pulse Sequence s2pul

Number of Scans 32

Receiver Gain 22

Relaxation Delay 5.0000

Pulse Width 4.9500

Acquisition Time 3.0000

Acquisition Date 2013-09-02T20:29:37

Spectrometer Frequency 499.70

Spectral Width 8000.0

Lowest Frequency -1004.3

Nucleus 1H

Acquired Size 24000

Spectral Size 65536

8.01  
7.25  
7.24  
7.23  
7.20  
7.19  
7.18  
7.18  
7.17  
7.17  
7.16  
6.93  
6.93  
6.92  
6.91  
6.90  
6.89  
4.94  
4.92  
4.56  
4.54  
4.53  
4.51  
3.70  
3.69  
3.68  
3.65  
3.63  
3.26  
3.24  
3.23  
3.22  
3.21  
3.20  
3.19  
3.17  
1.35  
1.25  
1.22  
1.21  
1.03  
1.02  
1.02  
1.02  
1.01  
1.00  
1.00  
1.00  
0.99  
0.99  
0.99  
0.98  
0.94  
0.94  
0.93  
0.92  
0.92  
0.91  
0.91  
0.90  
0.90  
0.89

| Parameter              | Value                                                                        |
|------------------------|------------------------------------------------------------------------------|
| Data File Name         | / Volumes/ data/ indy/ mkieffer/ vnmrsys/ data/ MEK6060-C/ CARBON01.fid/ fid |
| Title                  | CARBON01                                                                     |
| Origin                 | Varian                                                                       |
| Solvent                | cdcl3                                                                        |
| Temperature            | 25.0                                                                         |
| Pulse Sequence         | s2pul                                                                        |
| Number of Scans        | 512                                                                          |
| Receiver Gain          | 30                                                                           |
| Relaxation Delay       | 1.0000                                                                       |
| Pulse Width            | 4.2500                                                                       |
| Acquisition Time       | 1.0420                                                                       |
| Acquisition Date       | 2013-09-02T20:34:09                                                          |
| Spectrometer Frequency | 125.66                                                                       |
| Spectral Width         | 31446.5                                                                      |
| Lowest Frequency       | -1884.4                                                                      |
| Nucleus                | <sup>13</sup> C                                                              |
| Acquired Size          | 32768                                                                        |
| Spectral Size          | 65536                                                                        |

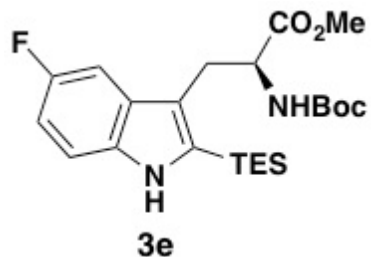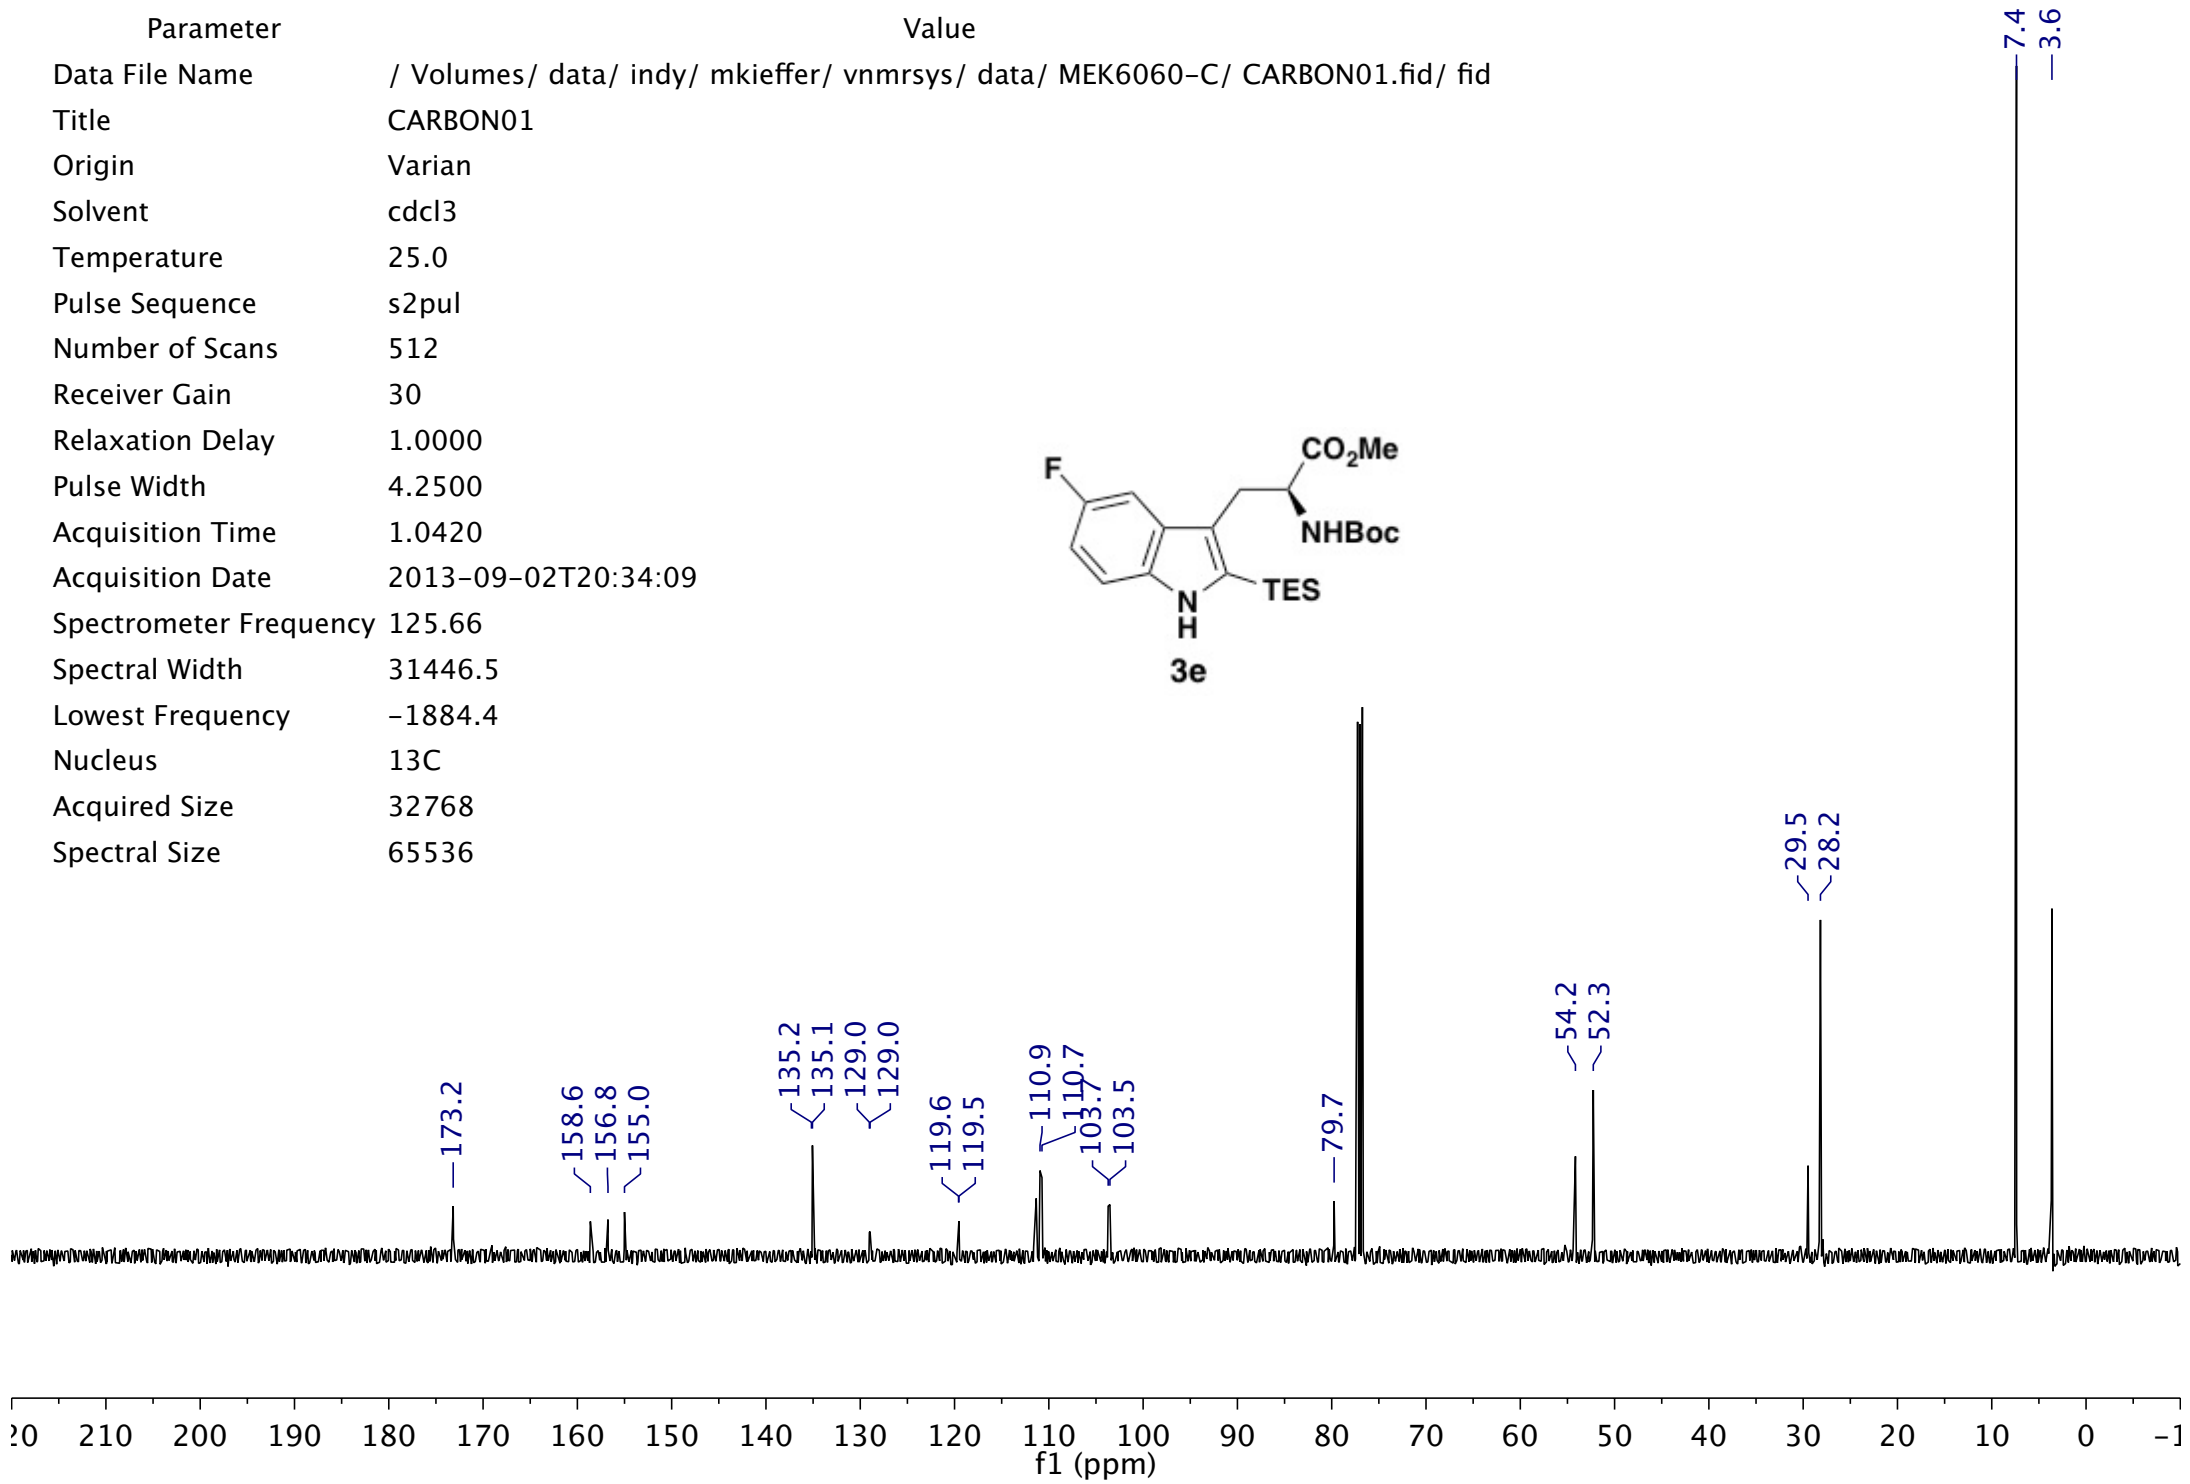

8.87  
7.51  
7.51  
7.51  
7.50  
7.50  
7.49  
7.18  
7.18  
7.16  
7.16  
7.04  
7.02  
7.01  
5.51  
5.49  
5.45  
4.46  
4.39  
4.38  
4.36  
4.35  
4.29  
3.56  
3.31  
3.30  
3.28  
3.27  
3.15  
3.13  
3.12  
3.10  
1.33  
1.29  
1.27  
1.25  
1.22  
1.20  
1.19  
1.17  
1.16  
1.02  
1.02  
1.01  
1.01  
1.01  
1.01  
1.00  
1.00  
1.00  
0.99  
0.98  
0.98  
0.98  
0.97  
0.97  
0.96  
0.96  
0.96  
0.95  
0.95  
0.94  
0.94

| Parameter              | Value                                                                           |
|------------------------|---------------------------------------------------------------------------------|
| Data File Name         | / Volumes/ data/ indy/ mkieffer/ vnmrsys/ data/ MEK-7-chloro/ PROTON01.fid/ fid |
| Title                  | PROTON01                                                                        |
| Origin                 | Varian                                                                          |
| Solvent                | cd3cn                                                                           |
| Temperature            | 25.0                                                                            |
| Pulse Sequence         | s2pul                                                                           |
| Number of Scans        | 32                                                                              |
| Receiver Gain          | 26                                                                              |
| Relaxation Delay       | 5.0000                                                                          |
| Pulse Width            | 4.9500                                                                          |
| Acquisition Time       | 3.0000                                                                          |
| Acquisition Date       | 2014-07-24T18:56:24                                                             |
| Spectrometer Frequency | 499.69                                                                          |
| Spectral Width         | 8000.0                                                                          |
| Lowest Frequency       | -1019.3                                                                         |
| Nucleus                | <sup>1</sup> H                                                                  |
| Acquired Size          | 24000                                                                           |
| Spectral Size          | 65536                                                                           |

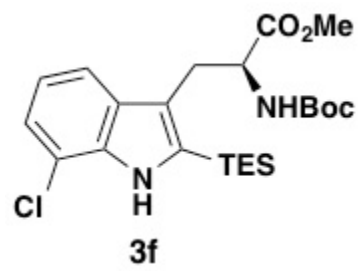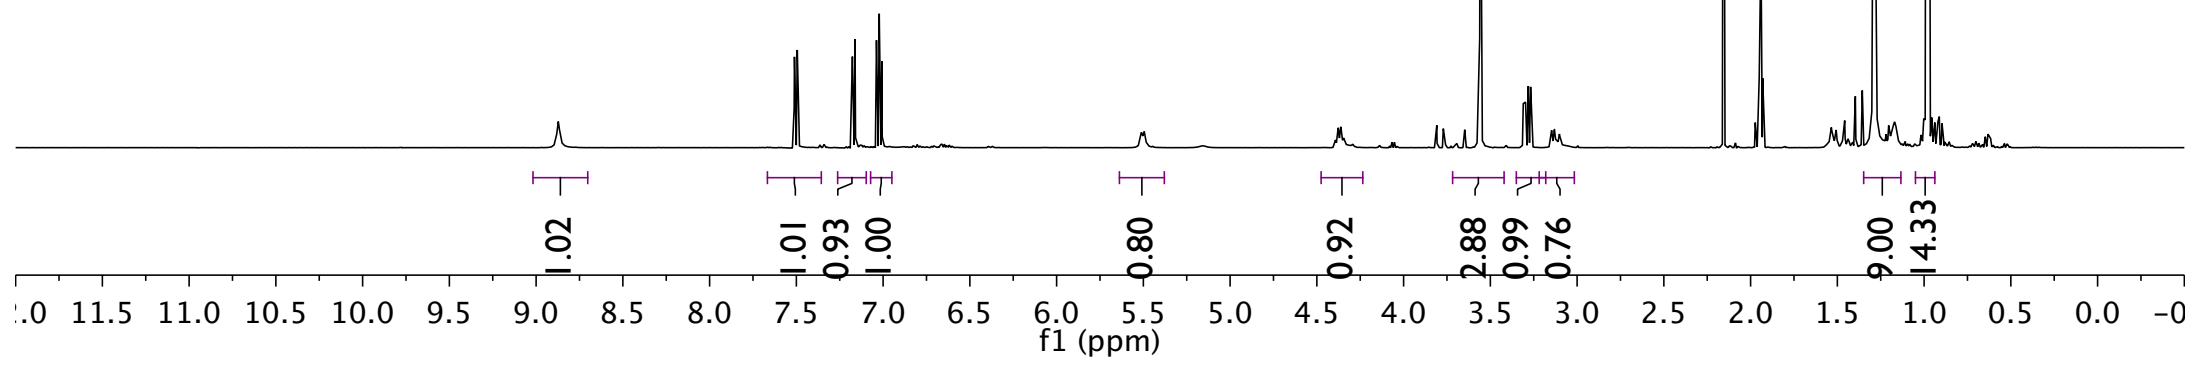

| Parameter              | Value                                                                          |
|------------------------|--------------------------------------------------------------------------------|
| Data File Name         | / Volumes/ data/ indy/ mkieffer/ vnmsys/ data/ MEK-7-chloro/ CARBON01.fid/ fid |
| Title                  | CARBON01                                                                       |
| Origin                 | Varian                                                                         |
| Solvent                | cd3cn                                                                          |
| Temperature            | 25.0                                                                           |
| Pulse Sequence         | s2pul                                                                          |
| Number of Scans        | 1000                                                                           |
| Receiver Gain          | 30                                                                             |
| Relaxation Delay       | 1.0000                                                                         |
| Pulse Width            | 4.2500                                                                         |
| Acquisition Time       | 1.0420                                                                         |
| Acquisition Date       | 2014-07-24T19:00:55                                                            |
| Spectrometer Frequency | 125.66                                                                         |
| Spectral Width         | 31446.5                                                                        |
| Lowest Frequency       | -1785.0                                                                        |
| Nucleus                | <sup>13</sup> C                                                                |
| Acquired Size          | 32768                                                                          |
| Spectral Size          | 65536                                                                          |

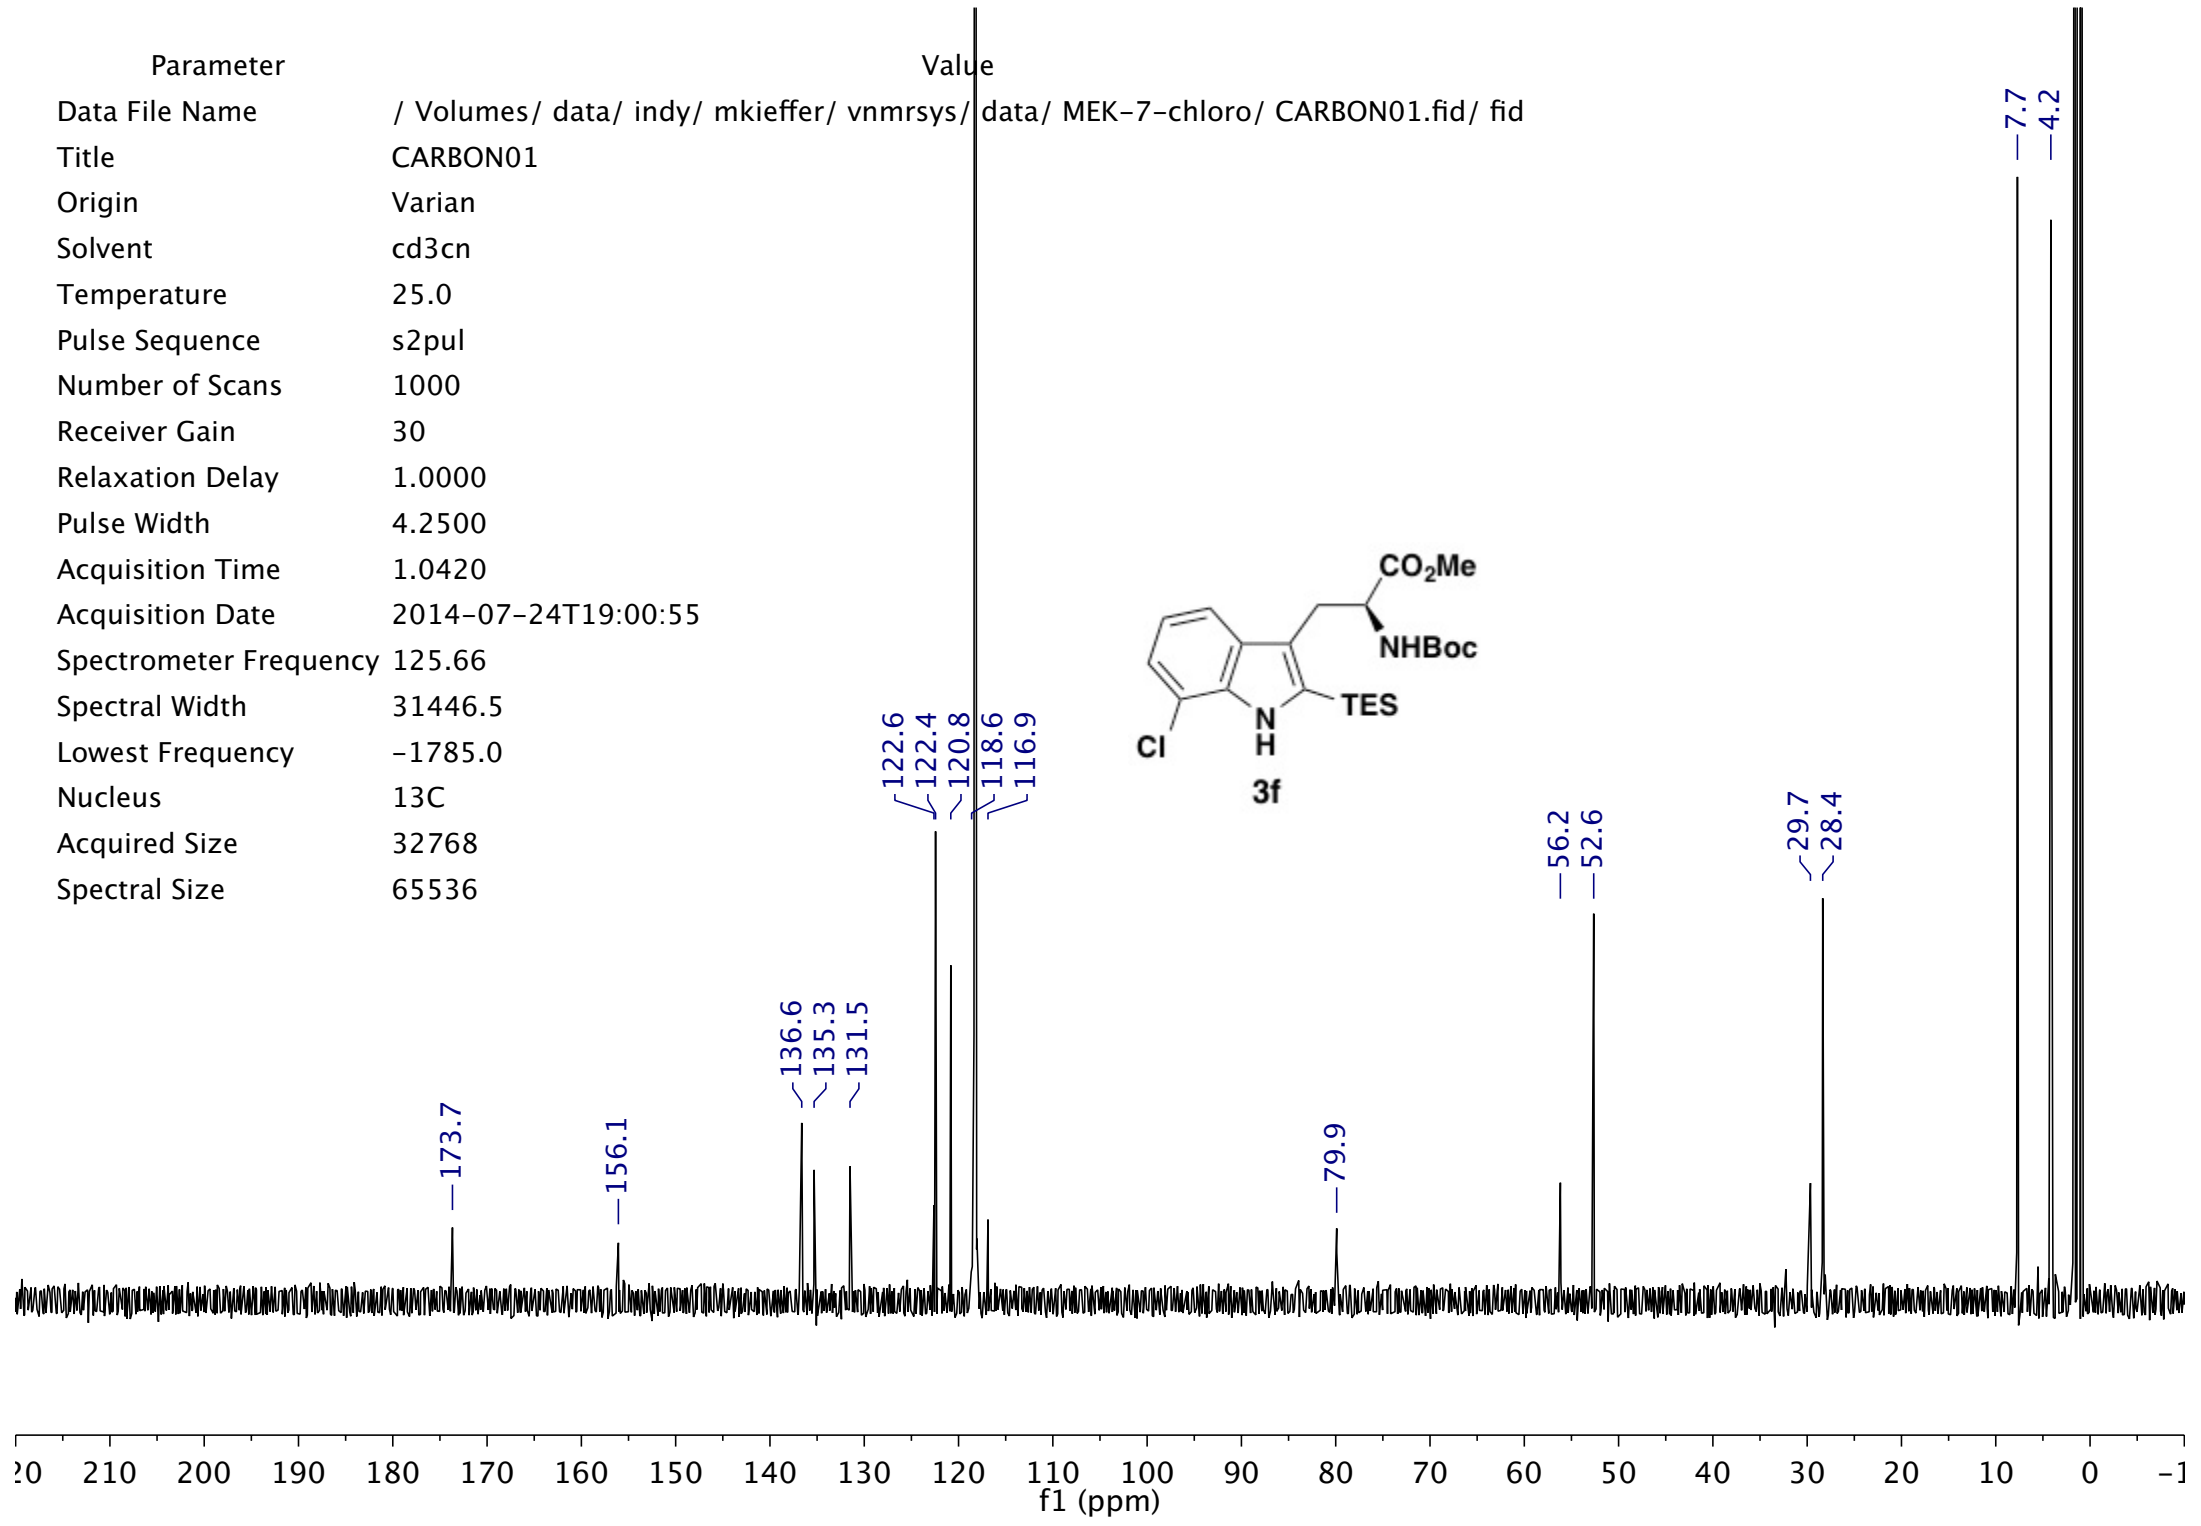

| Parameter              | Value                                                                        |
|------------------------|------------------------------------------------------------------------------|
| Data File Name         | / Volumes/ data/ indy/ mkieffer/ vnmrsys/ data/ MEK6060-B/ PROTON01.fid/ fid |
| Title                  | PROTON01                                                                     |
| Origin                 | Varian                                                                       |
| Solvent                | cdcl3                                                                        |
| Temperature            | 25.0                                                                         |
| Pulse Sequence         | s2pul                                                                        |
| Number of Scans        | 32                                                                           |
| Receiver Gain          | 24                                                                           |
| Relaxation Delay       | 5.0000                                                                       |
| Pulse Width            | 4.9500                                                                       |
| Acquisition Time       | 3.0000                                                                       |
| Acquisition Date       | 2013-09-02T20:56:08                                                          |
| Spectrometer Frequency | 499.70                                                                       |
| Spectral Width         | 8000.0                                                                       |
| Lowest Frequency       | -1004.3                                                                      |
| Nucleus                | 1H                                                                           |
| Acquired Size          | 24000                                                                        |
| Spectral Size          | 65536                                                                        |

7.98 7.47 7.45 7.33 7.33 7.05 7.05 7.04 7.03 4.93 4.92 4.57 4.56 4.54 4.53 3.61 3.23 3.22 1.35 1.02 1.01 1.01 1.00 1.00 1.00 0.99 0.98 0.98 0.98 0.93 0.93 0.92 0.92 0.91 0.90 0.90 0.90 0.89 0.88

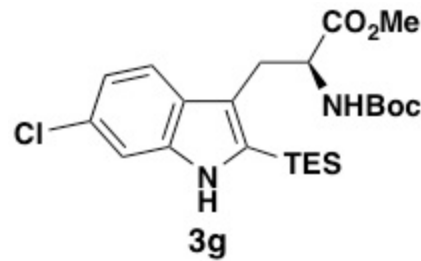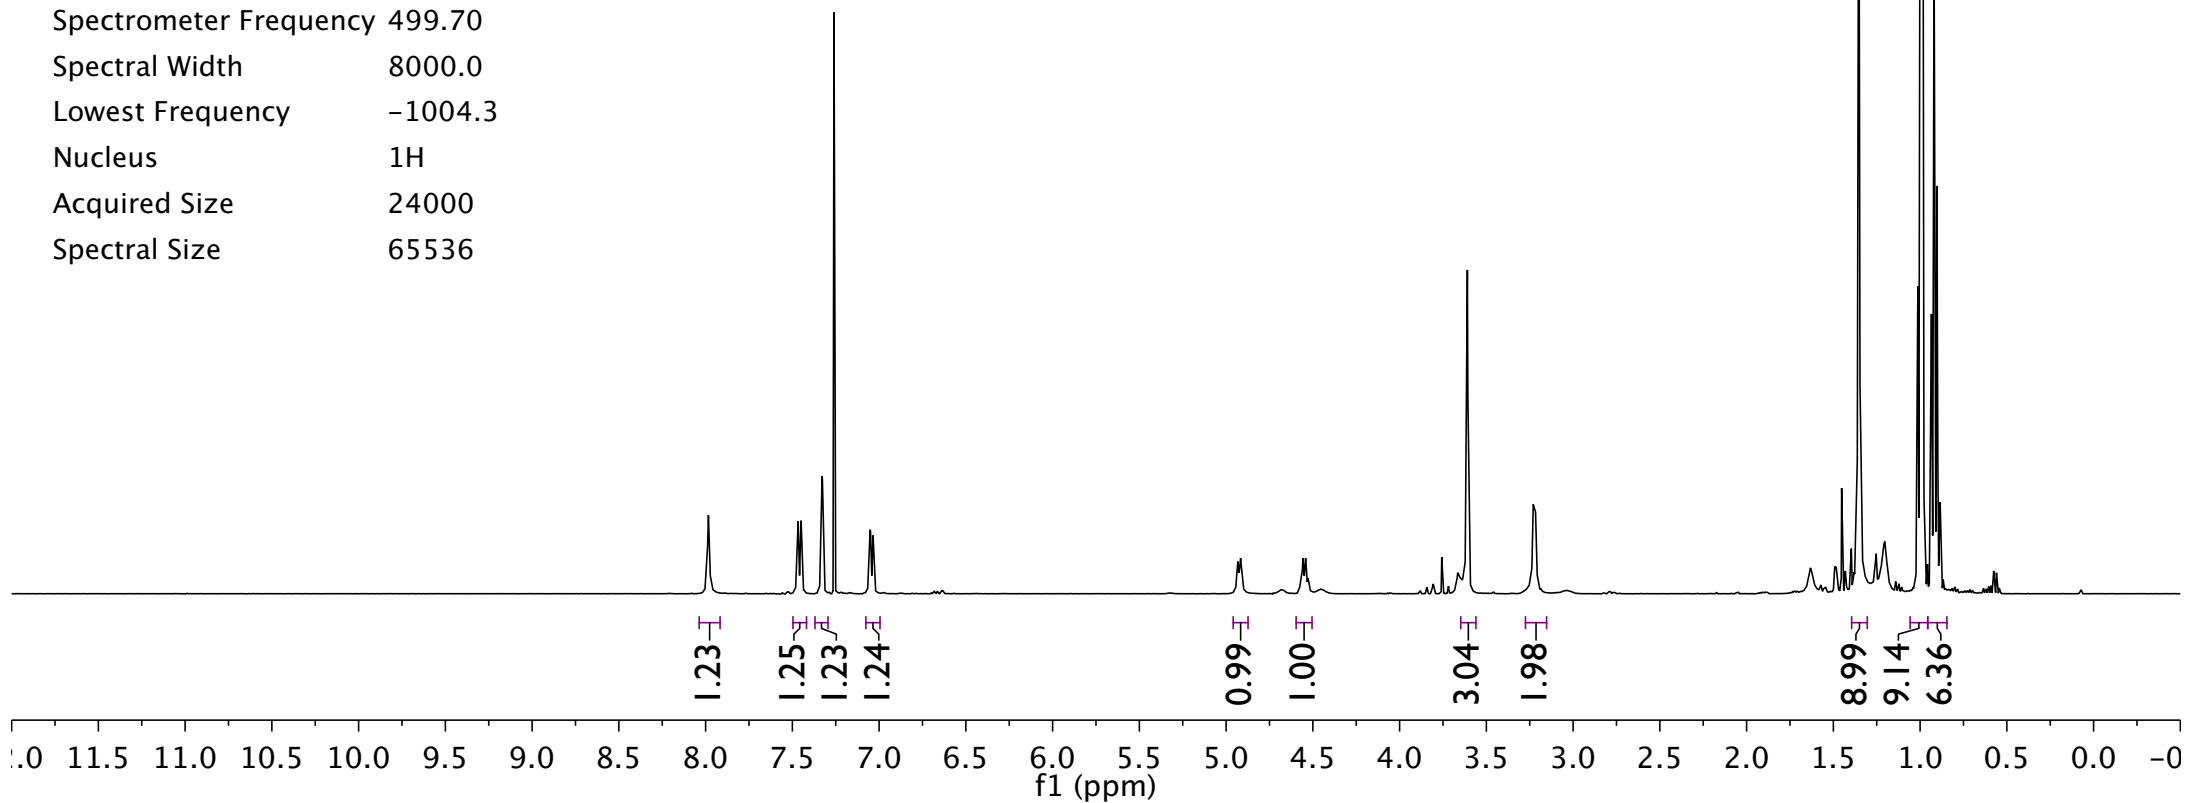

| Parameter              | Value                                                                        |
|------------------------|------------------------------------------------------------------------------|
| Data File Name         | / Volumes/ data/ indy/ mkieffer/ vnmrsys/ data/ MEK6060-B/ CARBON01.fid/ fid |
| Title                  | CARBON01                                                                     |
| Origin                 | Varian                                                                       |
| Solvent                | cdcl3                                                                        |
| Temperature            | 25.0                                                                         |
| Pulse Sequence         | s2pul                                                                        |
| Number of Scans        | 256                                                                          |
| Receiver Gain          | 30                                                                           |
| Relaxation Delay       | 1.0000                                                                       |
| Pulse Width            | 4.2500                                                                       |
| Acquisition Time       | 1.0420                                                                       |
| Acquisition Date       | 2013-09-02T21:00:40                                                          |
| Spectrometer Frequency | 125.66                                                                       |
| Spectral Width         | 31446.5                                                                      |
| Lowest Frequency       | -1884.1                                                                      |
| Nucleus                | <sup>13</sup> C                                                              |
| Acquired Size          | 32768                                                                        |
| Spectral Size          | 65536                                                                        |

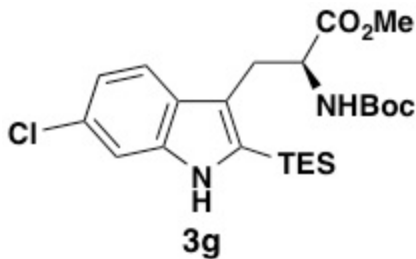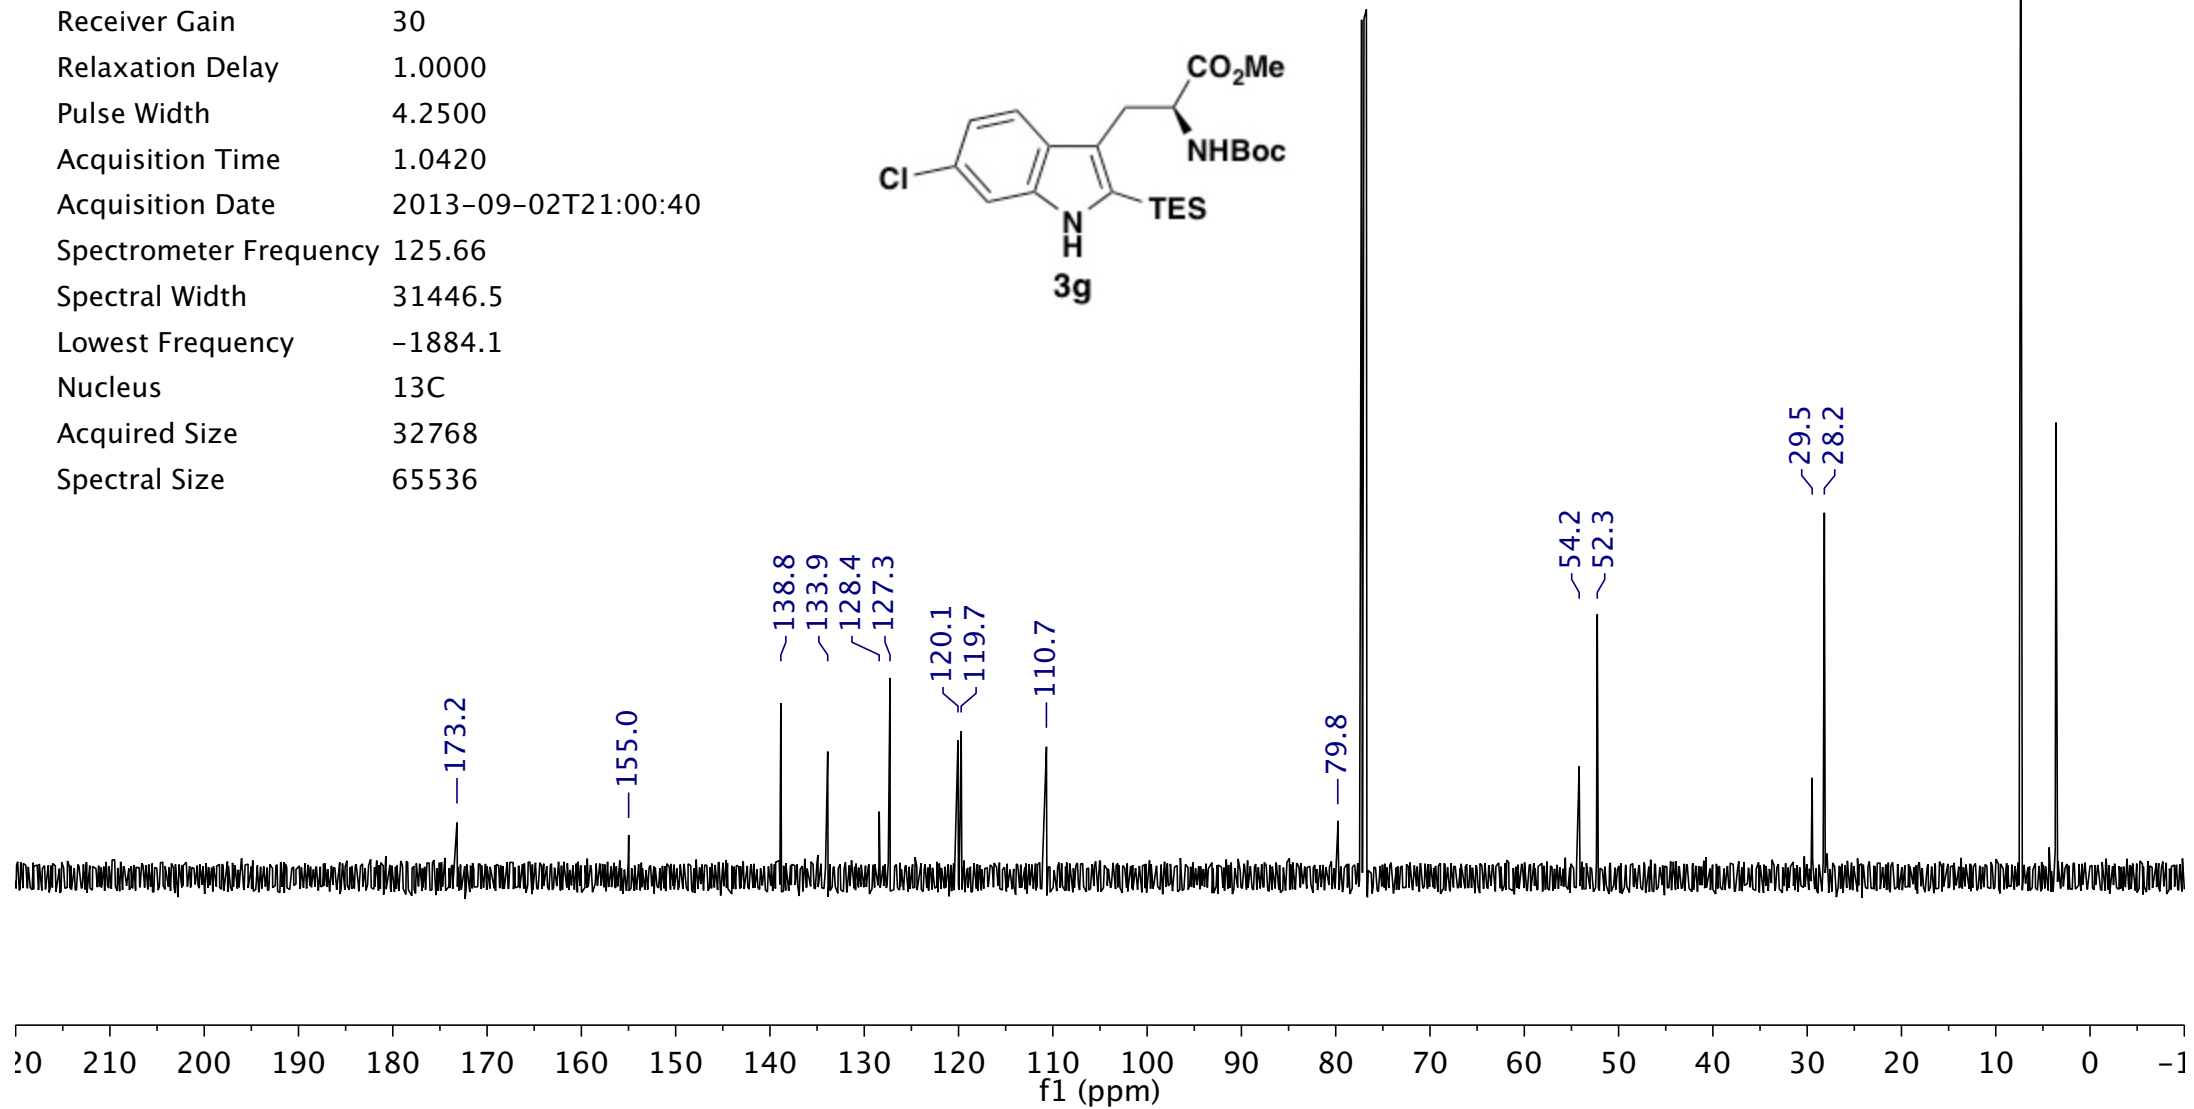



Parameter Value

Data File Name / Volumes/ data/ indy/ mkieffer/ vnmrsys/ data/ MEK-7-bromo-TBAF/ PROTON01.fid/ fid

Title PROTON01

Origin Varian

Solvent cd3cn

Temperature 25.0

Pulse Sequence s2pul

Number of Scans 32

Receiver Gain 34

Relaxation Delay 5.0000

Pulse Width 4.9500

Acquisition Time 3.0000

Acquisition Date 2014-09-09T13:44:59

Spectrometer Frequency 499.69

Spectral Width 8000.0

Lowest Frequency -1019.3

Nucleus 1H

Acquired Size 24000

Spectral Size 65536

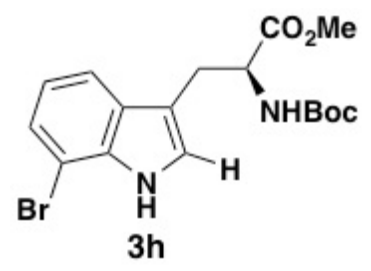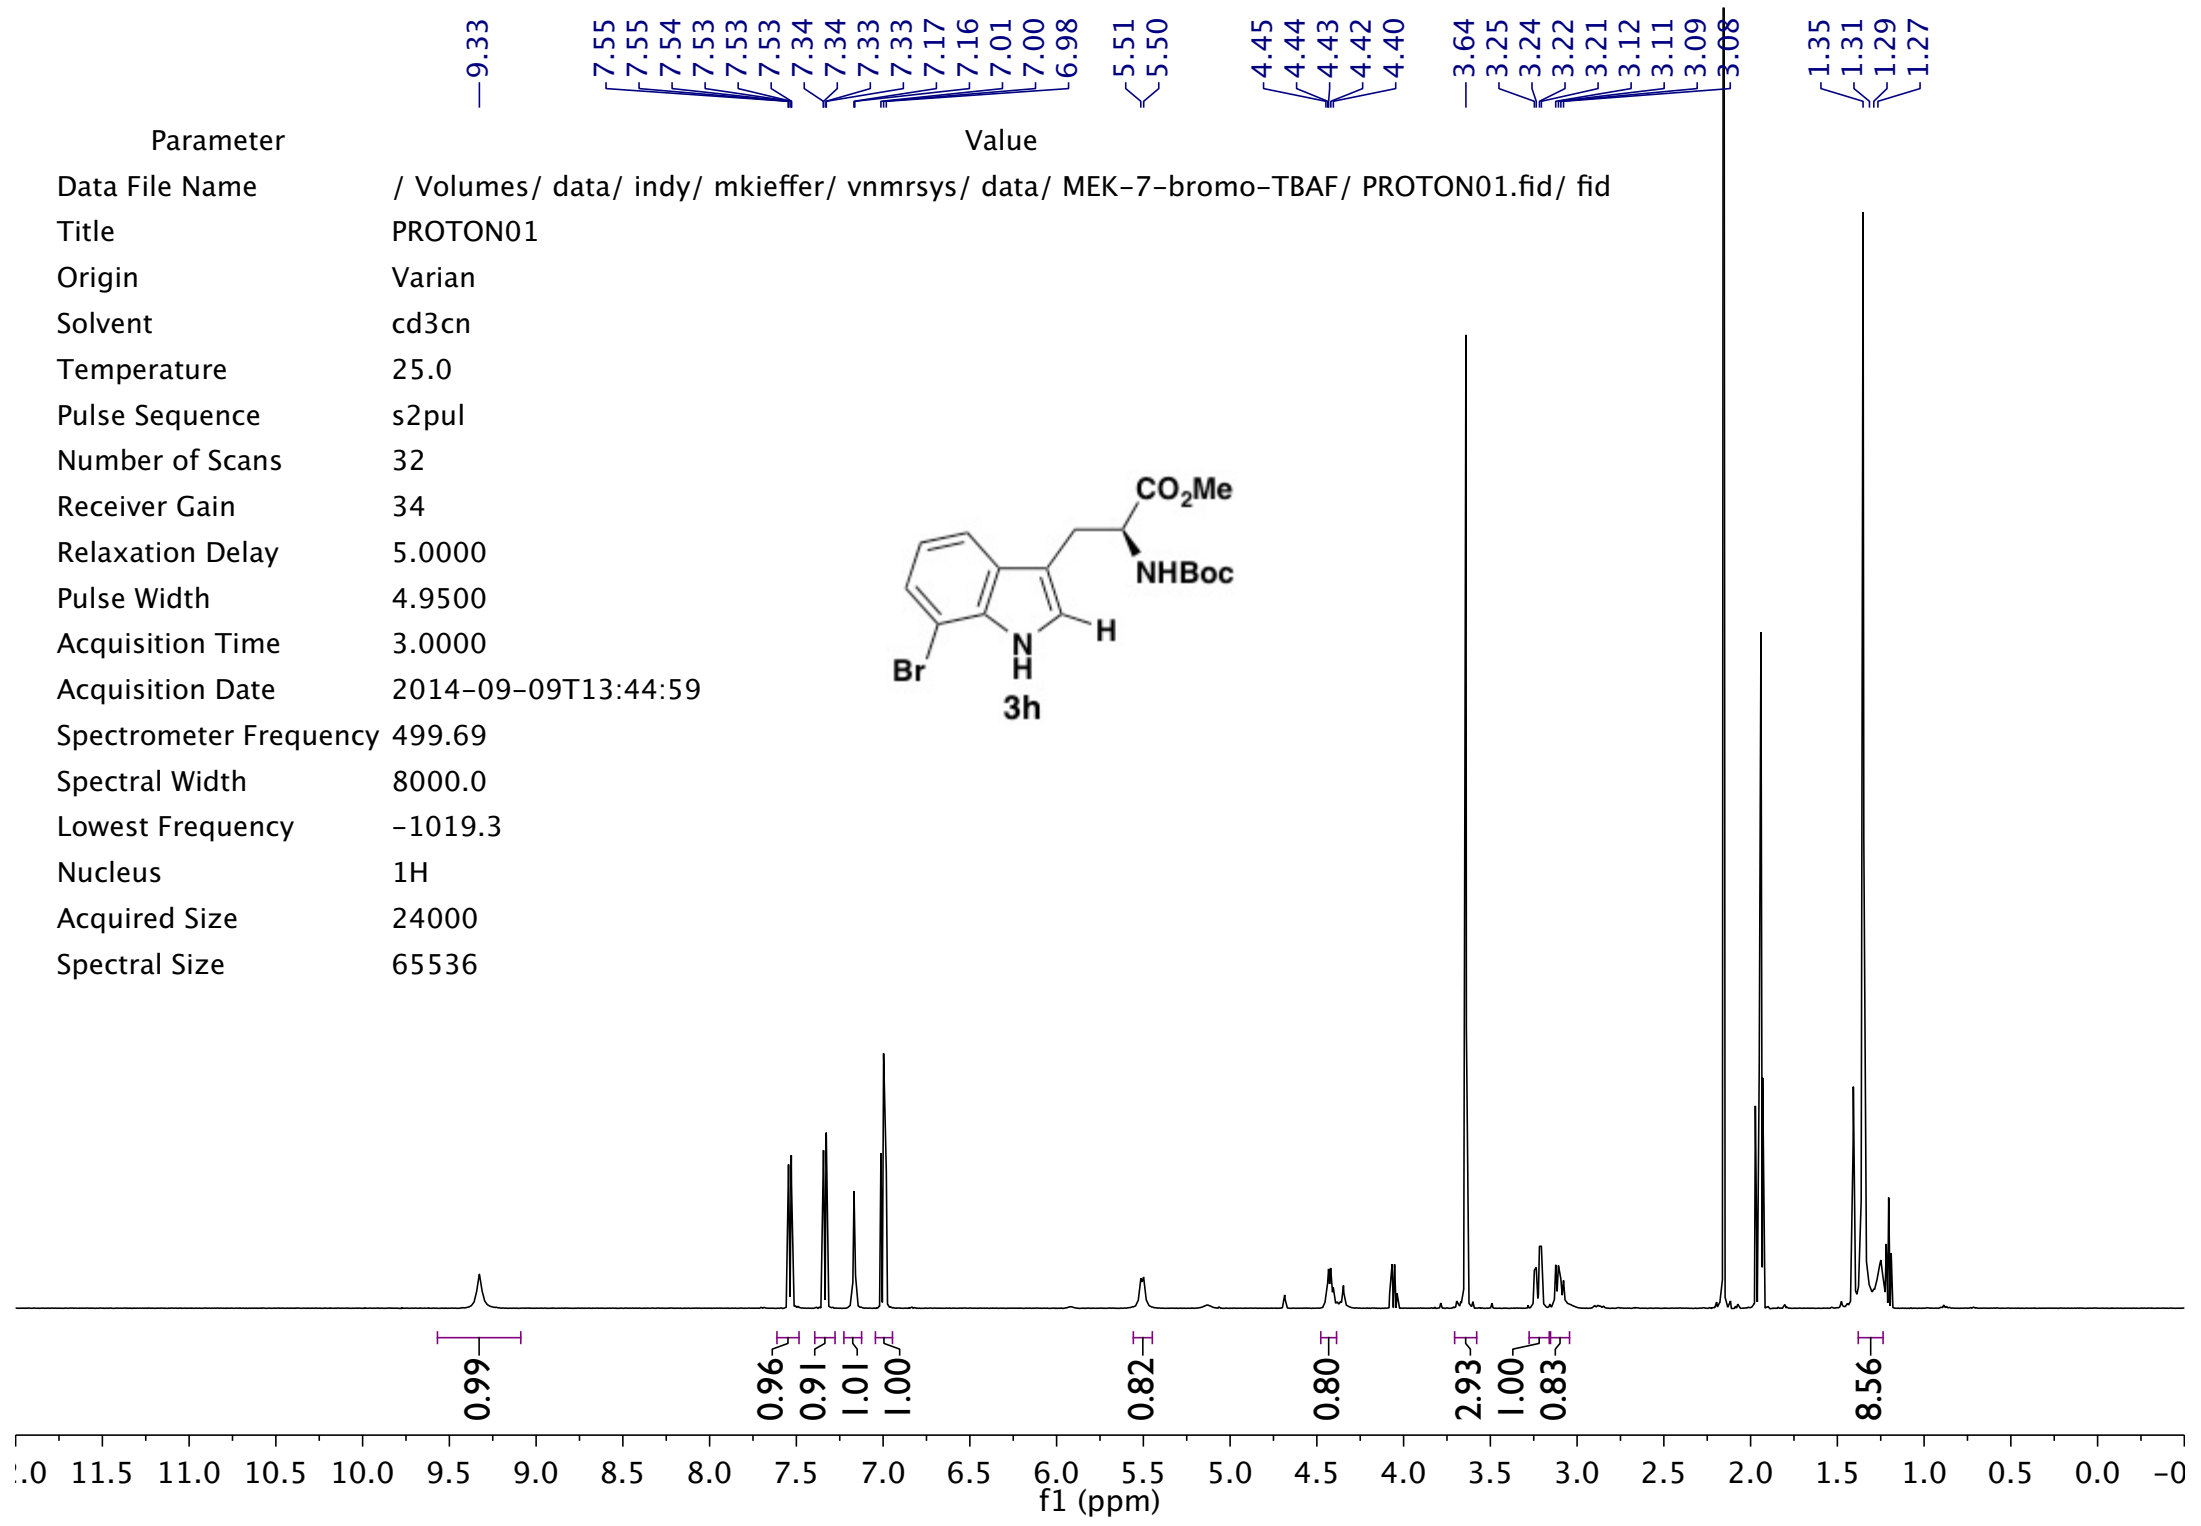

| Parameter              | Value                                                                               |
|------------------------|-------------------------------------------------------------------------------------|
| Data File Name         | / Volumes/ data/ indy/ mkieffer/ vnmrsys/ data/ MEK-7-bromo-TBAF/ CARBON01.fid/ fid |
| Title                  | CARBON01                                                                            |
| Origin                 | Varian                                                                              |
| Solvent                | cd3cn                                                                               |
| Temperature            | 25.0                                                                                |
| Pulse Sequence         | s2pul                                                                               |
| Number of Scans        | 1500                                                                                |
| Receiver Gain          | 30                                                                                  |
| Relaxation Delay       | 1.0000                                                                              |
| Pulse Width            | 4.2500                                                                              |
| Acquisition Time       | 1.0420                                                                              |
| Acquisition Date       | 2014-09-09T13:49:30                                                                 |
| Spectrometer Frequency | 125.66                                                                              |
| Spectral Width         | 31446.5                                                                             |
| Lowest Frequency       | -1785.9                                                                             |
| Nucleus                | <sup>13</sup> C                                                                     |
| Acquired Size          | 32768                                                                               |
| Spectral Size          | 65536                                                                               |

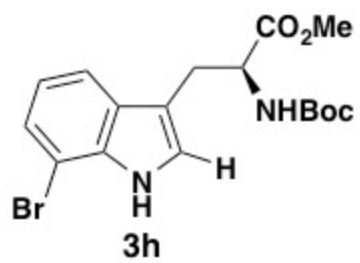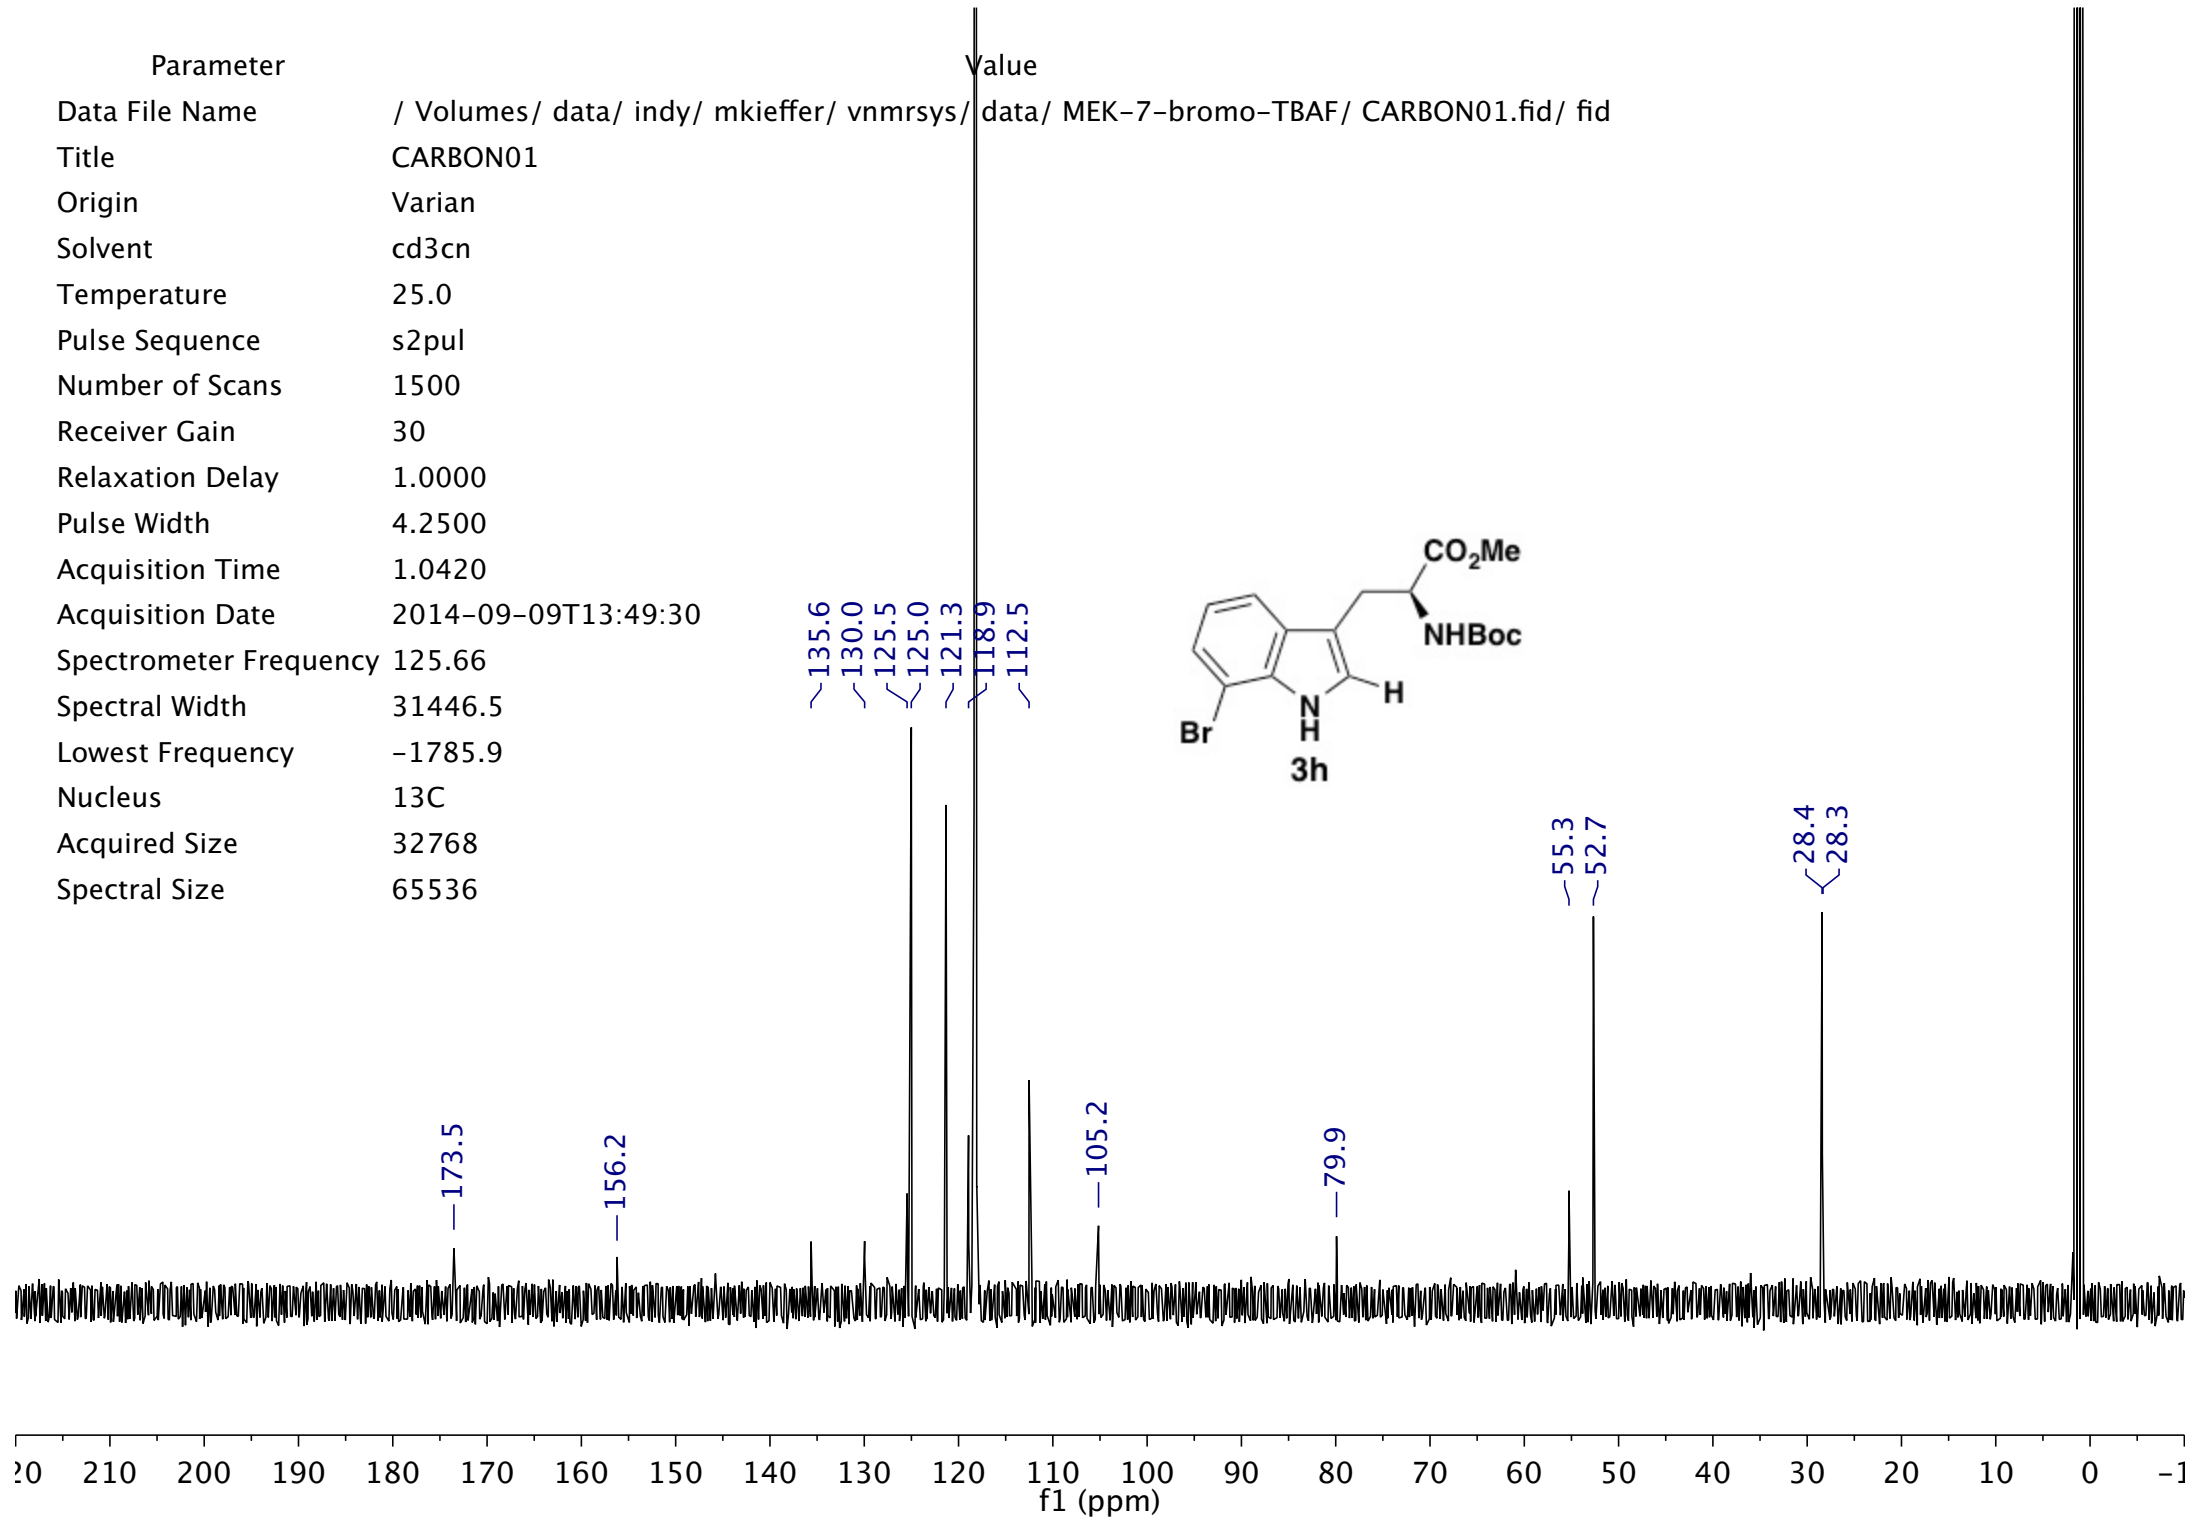

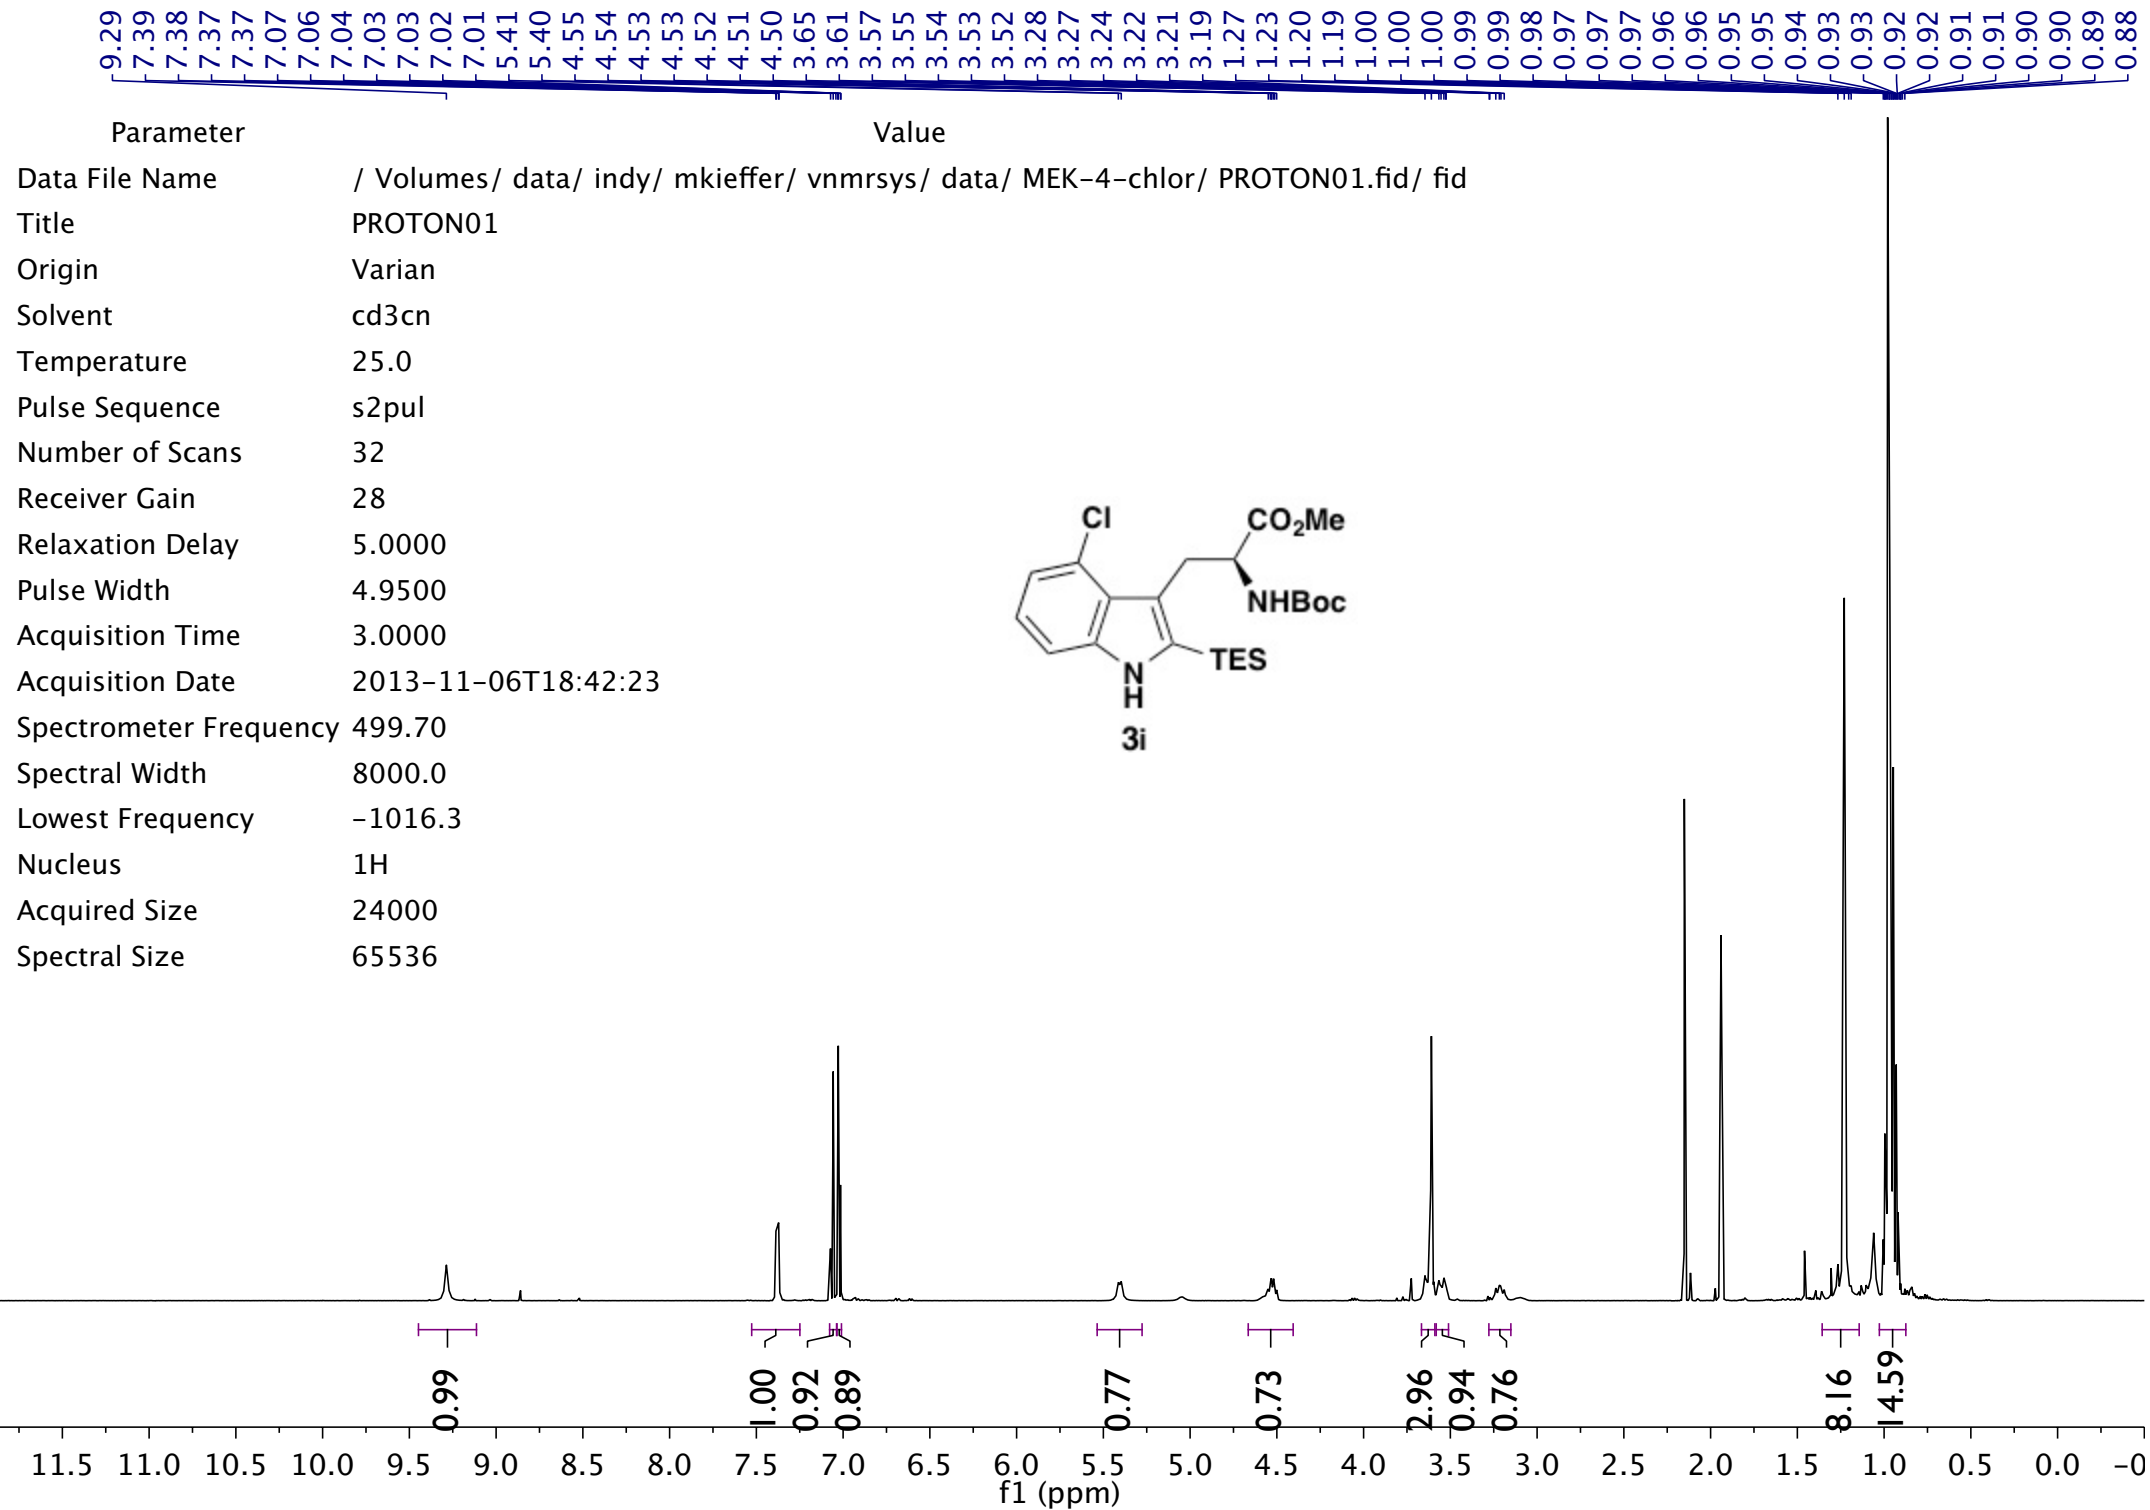

Parameter Value  
 Data File Name / Volumes/ data/ indy/ mkieffer/ vnmrsys/ data/ MEK-4-chlor/ PROTON01.fid/ fid  
 Title PROTON01  
 Origin Varian  
 Solvent cd3cn  
 Temperature 25.0  
 Pulse Sequence s2pul  
 Number of Scans 32  
 Receiver Gain 28  
 Relaxation Delay 5.0000  
 Pulse Width 4.9500  
 Acquisition Time 3.0000  
 Acquisition Date 2013-11-06T18:42:23  
 Spectrometer Frequency 499.70  
 Spectral Width 8000.0  
 Lowest Frequency -1016.3  
 Nucleus 1H  
 Acquired Size 24000  
 Spectral Size 65536

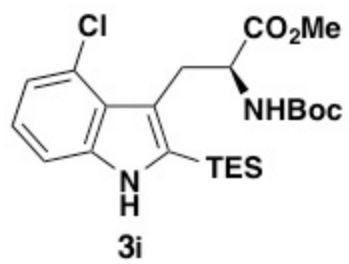

| Parameter              | Value                                                                          |
|------------------------|--------------------------------------------------------------------------------|
| Data File Name         | / Volumes/ data/ indy/ mkieffer/ vnmrsys/ data/ MEK-4-chlor/ CARBON01.fid/ fid |
| Title                  | CARBON01                                                                       |
| Origin                 | Varian                                                                         |
| Solvent                | cd3cn                                                                          |
| Temperature            | 25.0                                                                           |
| Pulse Sequence         | s2pul                                                                          |
| Number of Scans        | 512                                                                            |
| Receiver Gain          | 30                                                                             |
| Relaxation Delay       | 1.0000                                                                         |
| Pulse Width            | 4.2500                                                                         |
| Acquisition Time       | 1.0420                                                                         |
| Acquisition Date       | 2013-11-06T18:47:01                                                            |
| Spectrometer Frequency | 125.66                                                                         |
| Spectral Width         | 31446.5                                                                        |
| Lowest Frequency       | -1783.4                                                                        |
| Nucleus                | <sup>13</sup> C                                                                |
| Acquired Size          | 32768                                                                          |
| Spectral Size          | 65536                                                                          |

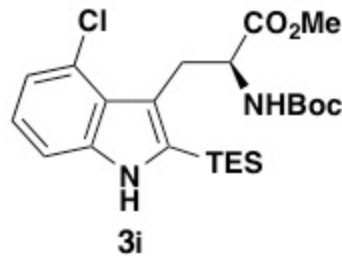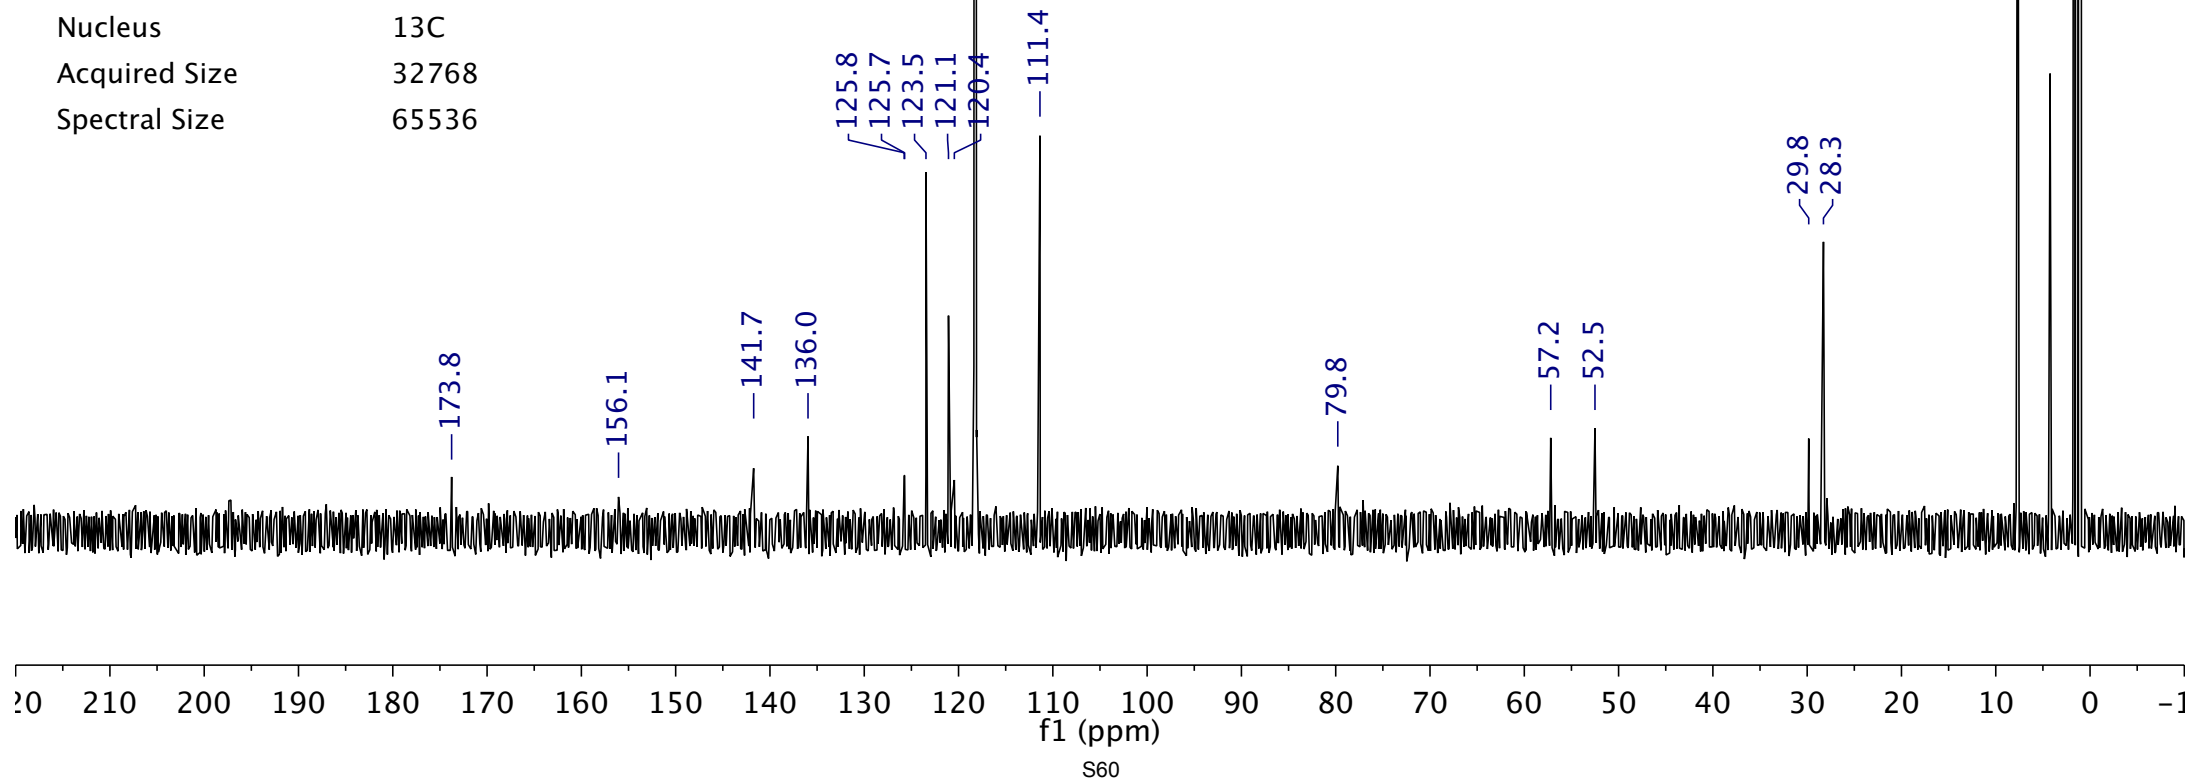

9.36  
7.27  
7.26  
7.25  
7.25  
7.24  
7.23  
7.23  
5.59  
5.57  
4.34  
4.33  
4.32  
4.31  
4.30  
3.59  
3.26  
3.25  
3.23  
3.22  
3.07  
3.05  
3.04  
3.02  
2.99  
1.27  
1.20  
1.17  
1.00  
0.99  
0.99  
0.99  
0.98  
0.98  
0.98  
0.97  
0.97  
0.96  
0.96  
0.96  
0.96  
0.95  
0.95  
0.95  
0.94  
0.94  
0.94  
0.94  
0.93  
0.93  
0.93  
0.92  
0.92  
0.92  
0.92  
0.91

| Parameter              | Value                                                                       |
|------------------------|-----------------------------------------------------------------------------|
| Data File Name         | / Volumes/ data/ indy/ kangway/ vnmrsys/ data/ MEK6150-C/ PROTON01.fid/ fid |
| Title                  | PROTON01                                                                    |
| Origin                 | Varian                                                                      |
| Solvent                | cd3cn                                                                       |
| Temperature            | 25.0                                                                        |
| Pulse Sequence         | s2pul                                                                       |
| Number of Scans        | 32                                                                          |
| Receiver Gain          | 30                                                                          |
| Relaxation Delay       | 5.0000                                                                      |
| Pulse Width            | 4.9500                                                                      |
| Acquisition Time       | 3.0000                                                                      |
| Acquisition Date       | 2014-02-03T03:25:19                                                         |
| Spectrometer Frequency | 499.70                                                                      |
| Spectral Width         | 8000.0                                                                      |
| Lowest Frequency       | -1016.3                                                                     |
| Nucleus                | 1H                                                                          |
| Acquired Size          | 24000                                                                       |
| Spectral Size          | 65536                                                                       |

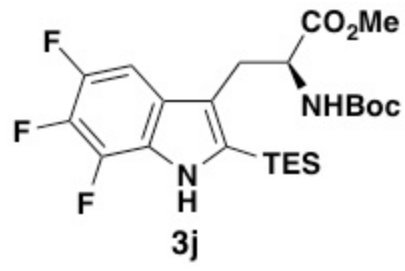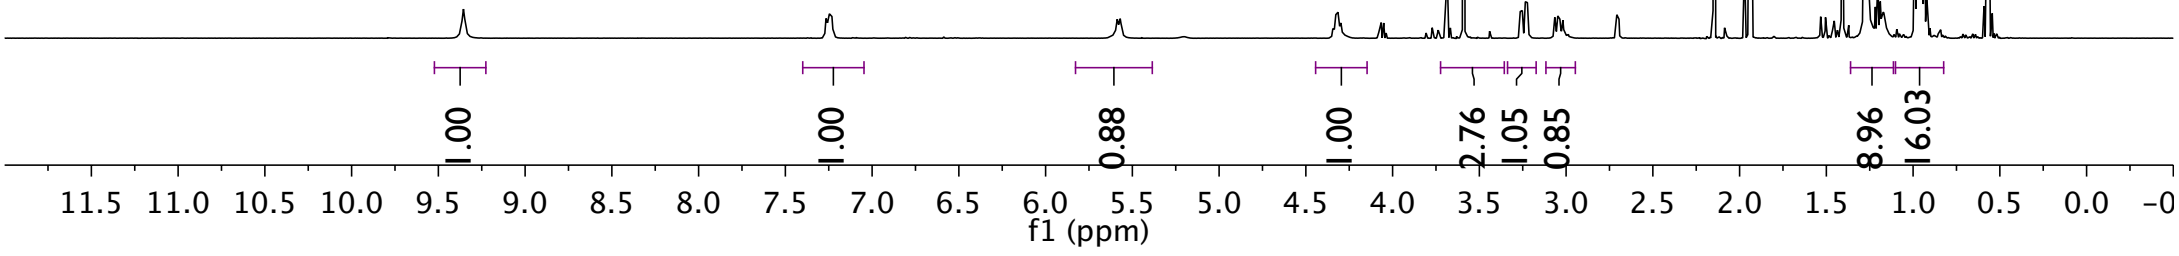

| Parameter              | Value                                                                       |
|------------------------|-----------------------------------------------------------------------------|
| Data File Name         | / Volumes/ data/ indy/ kangway/ vnmrsys/ data/ MEK6150-C/ CARBON01.fid/ fid |
| Title                  | CARBON01                                                                    |
| Origin                 | Varian                                                                      |
| Solvent                | cd3cn                                                                       |
| Temperature            | 25.0                                                                        |
| Pulse Sequence         | s2pul                                                                       |
| Number of Scans        | 8000                                                                        |
| Receiver Gain          | 30                                                                          |
| Relaxation Delay       | 1.0000                                                                      |
| Pulse Width            | 4.2500                                                                      |
| Acquisition Time       | 1.0420                                                                      |
| Acquisition Date       | 2014-02-03T03:29:58                                                         |
| Spectrometer Frequency | 125.66                                                                      |
| Spectral Width         | 31446.5                                                                     |
| Lowest Frequency       | -1782.8                                                                     |
| Nucleus                | <sup>13</sup> C                                                             |
| Acquired Size          | 32768                                                                       |
| Spectral Size          | 65536                                                                       |

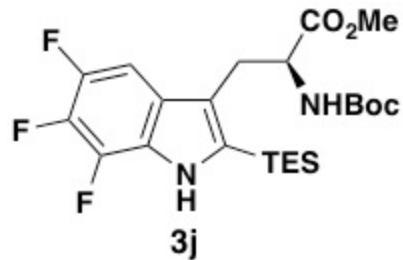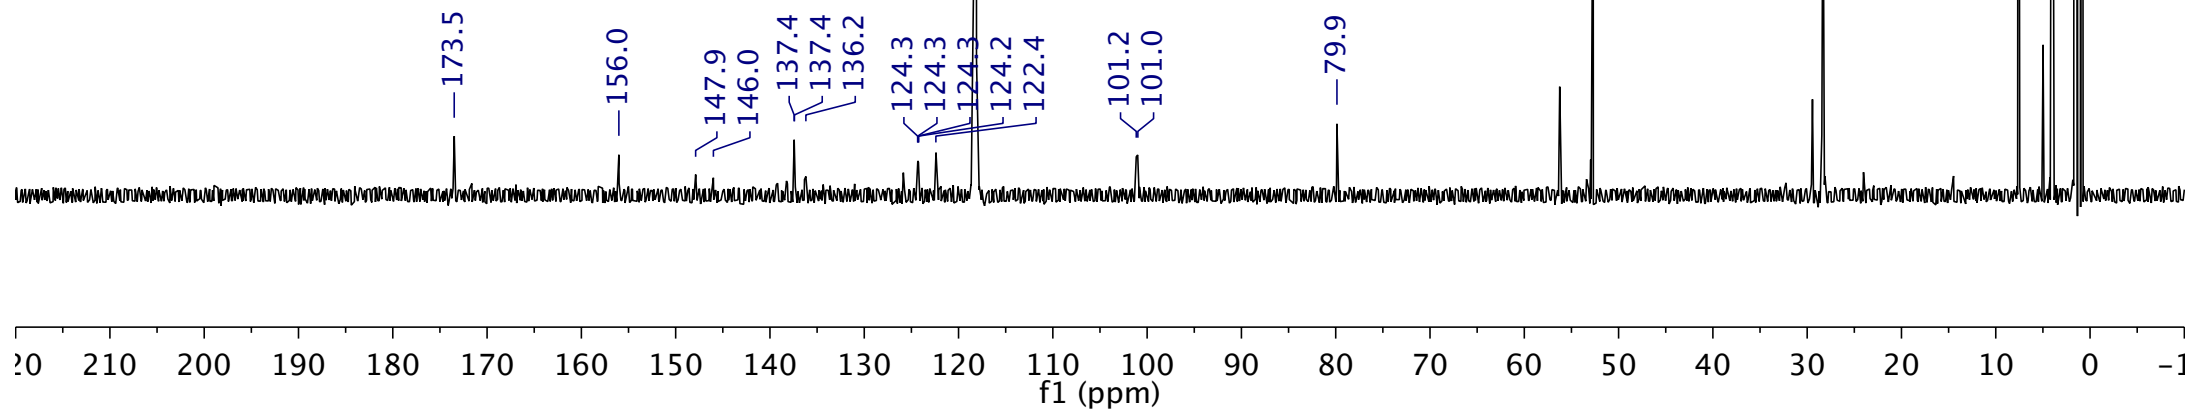

9.66  
8.30  
8.30  
7.92  
7.92  
7.91  
7.90  
7.67  
7.67  
7.67  
7.66  
7.65  
7.65  
5.60  
5.58  
4.40  
4.38  
4.37  
4.35  
3.57  
3.34  
3.33  
3.31  
3.31  
3.30  
3.30  
3.21  
3.17  
3.16  
3.15  
3.13  
1.26  
1.15  
1.02  
1.02  
1.01  
1.01  
1.00  
1.00  
1.00  
1.00  
0.99  
0.99  
0.99  
0.98  
0.98  
0.98  
0.97  
0.97  
0.97  
0.96  
0.96  
0.95  
0.95  
0.95  
0.94  
0.94

Parameter

Value

Data File Name / Volumes/ data/ indy/ mkieffer/ vnmrsys/ data/ MEK-nitro/ PROTON01.fid/ fid  
 Title PROTON01  
 Origin Varian  
 Solvent cd3cn  
 Temperature 25.0  
 Pulse Sequence s2pul  
 Number of Scans 32  
 Receiver Gain 30  
 Relaxation Delay 5.0000  
 Pulse Width 4.9500  
 Acquisition Time 3.0000  
 Acquisition Date 2014-01-20T17:21:38  
 Spectrometer Frequency 499.70  
 Spectral Width 8000.0  
 Lowest Frequency -1016.3  
 Nucleus 1H  
 Acquired Size 24000  
 Spectral Size 65536

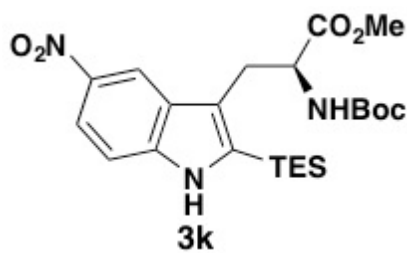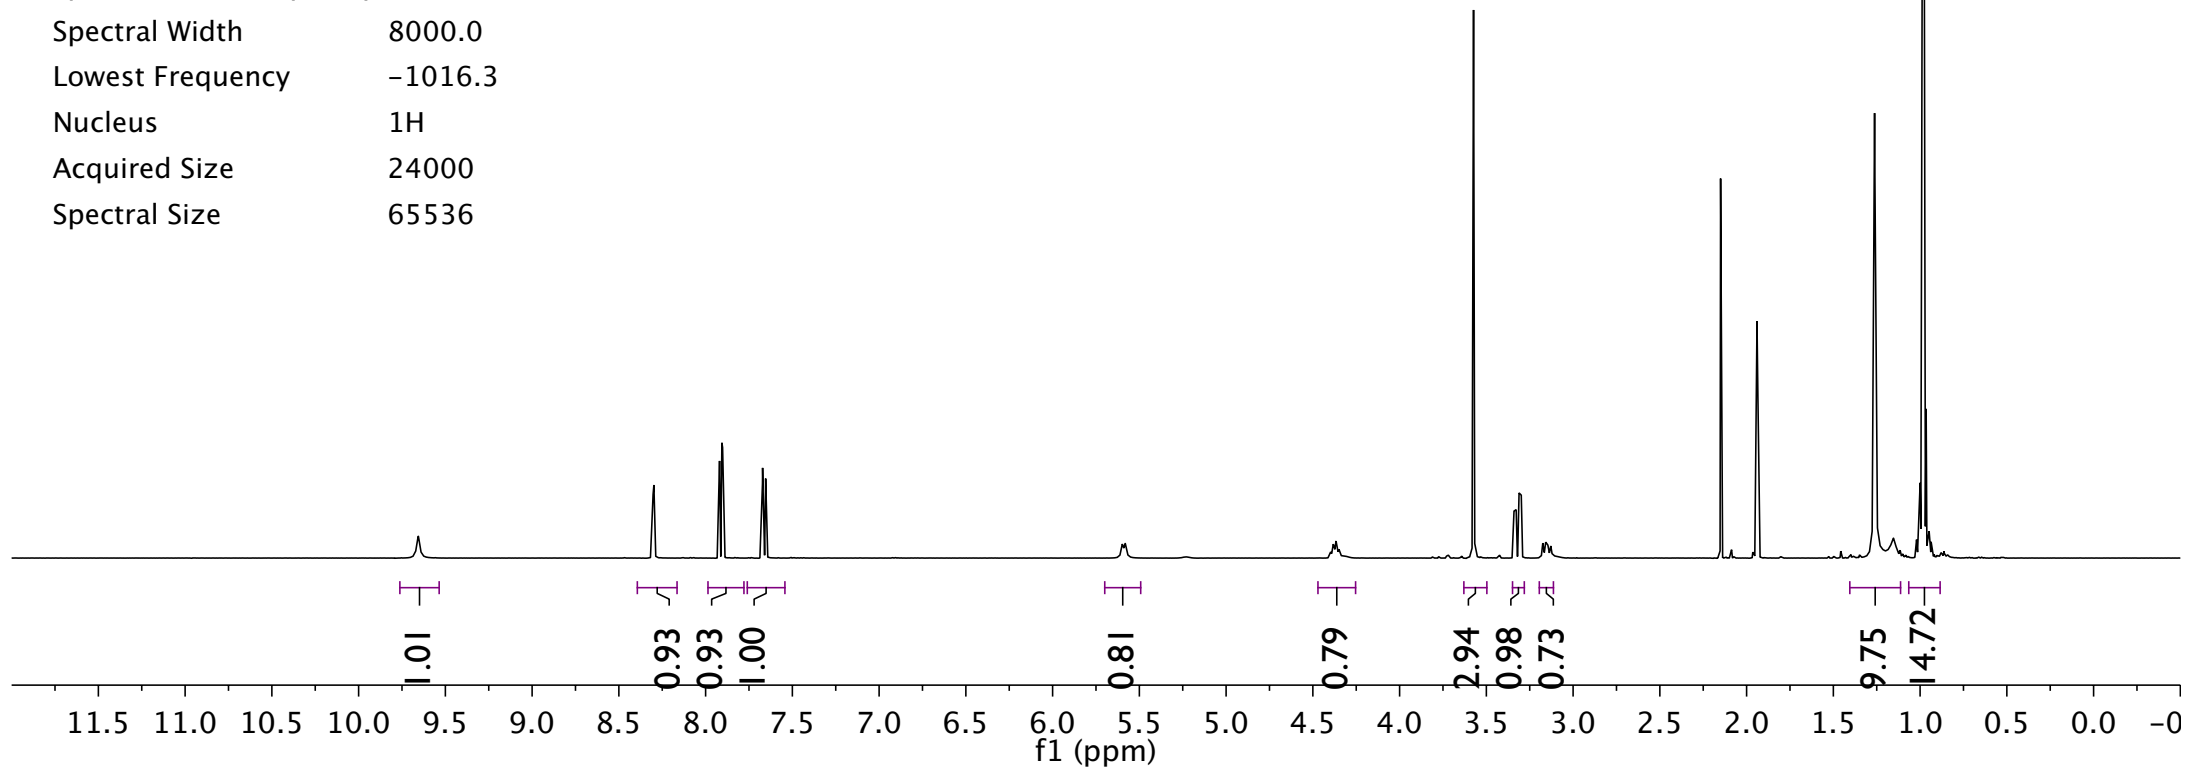

| Parameter              | Value                                                                        |
|------------------------|------------------------------------------------------------------------------|
| Data File Name         | / Volumes/ data/ indy/ mkieffer/ vnmrsys/ data/ MEK-nitro/ CARBON01.fid/ fid |
| Title                  | CARBON01                                                                     |
| Origin                 | Varian                                                                       |
| Solvent                | cd3cn                                                                        |
| Temperature            | 25.0                                                                         |
| Pulse Sequence         | s2pul                                                                        |
| Number of Scans        | 512                                                                          |
| Receiver Gain          | 30                                                                           |
| Relaxation Delay       | 1.0000                                                                       |
| Pulse Width            | 4.2500                                                                       |
| Acquisition Time       | 1.0420                                                                       |
| Acquisition Date       | 2014-01-20T17:26:17                                                          |
| Spectrometer Frequency | 125.66                                                                       |
| Spectral Width         | 31446.5                                                                      |
| Lowest Frequency       | -1782.8                                                                      |
| Nucleus                | <sup>13</sup> C                                                              |
| Acquired Size          | 32768                                                                        |
| Spectral Size          | 65536                                                                        |

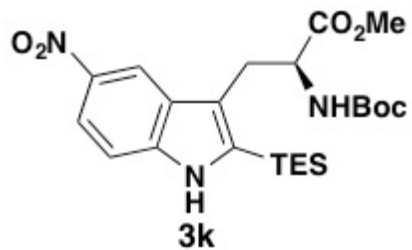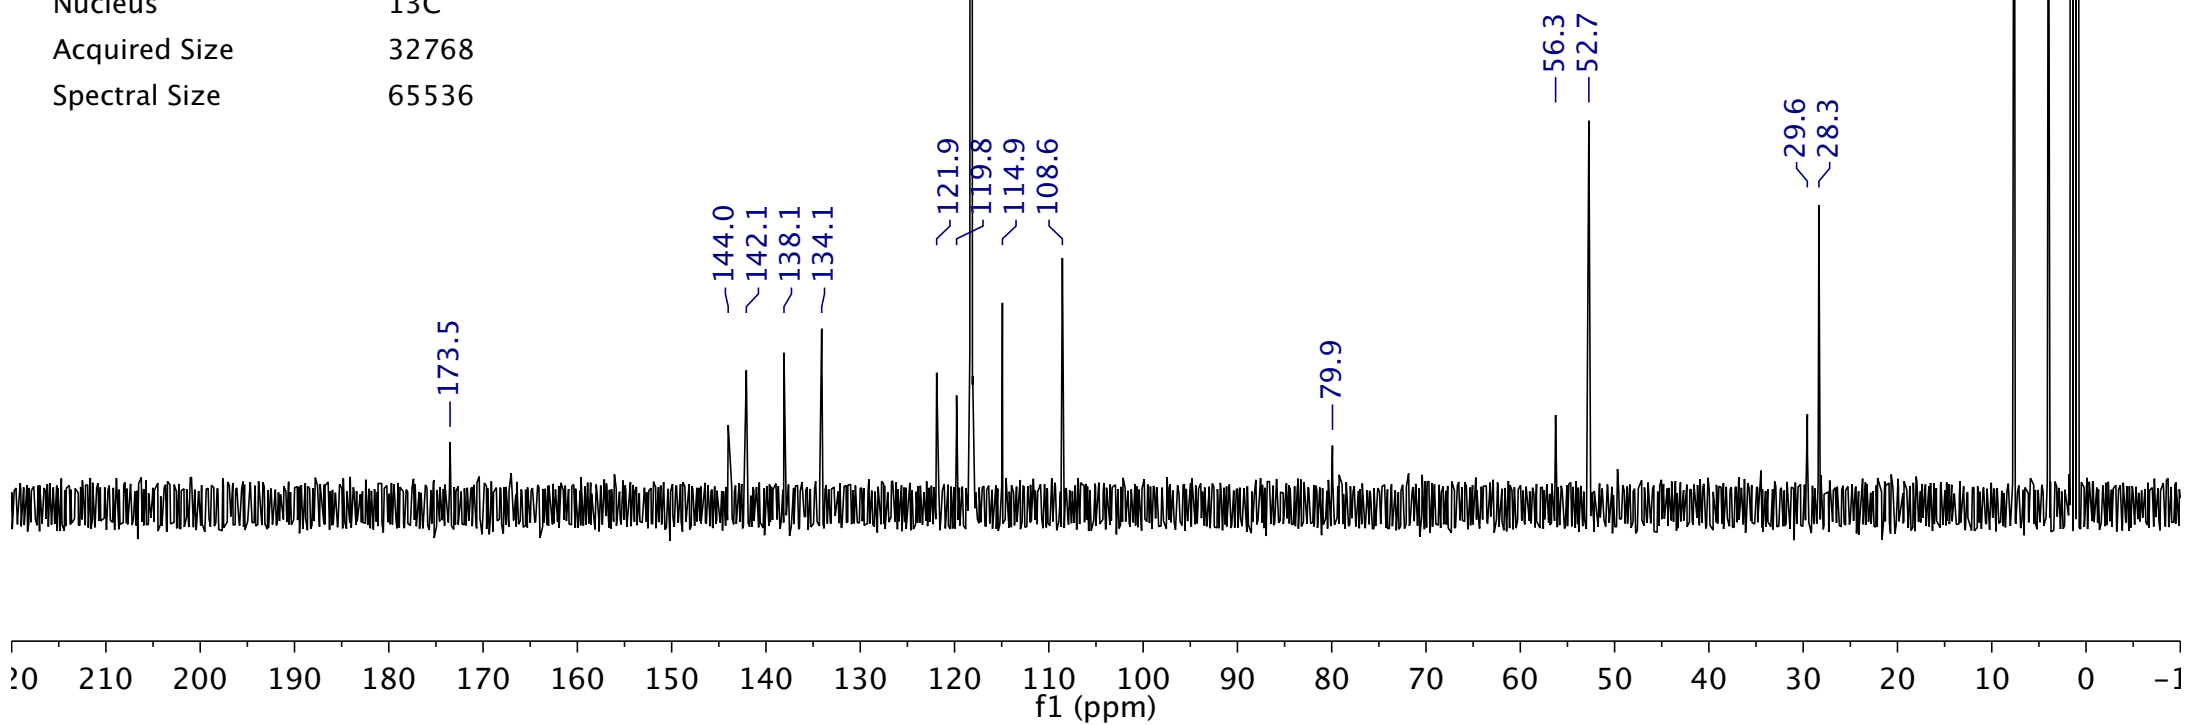



9.49 8.03 7.51 7.50 7.39 7.38 7.37 7.37 5.67 5.65 4.37 4.36 4.35 4.34 4.33 4.32 3.62 3.33 3.32 3.30 3.29 3.13 3.11 3.10 3.08 1.27 1.23 1.14 1.01 1.01 1.00 1.00 1.00 0.99 0.99 0.99 0.98 0.97 0.97 0.97 0.97 0.96 0.96 0.96 0.95 0.95 0.95 0.94 0.94 0.94 0.94 0.93 0.93 0.93 0.92 0.92 0.92 0.92

Parameter

Value

Data File Name / Volumes/ data/ indy/ kangway/ vnmrsys/ data/ MEK6122/ PROTON01.fid/ fid  
 Title PROTON01  
 Origin Varian  
 Solvent cd3cn  
 Temperature 25.0  
 Pulse Sequence s2pul  
 Number of Scans 32  
 Receiver Gain 32  
 Relaxation Delay 5.0000  
 Pulse Width 4.9500  
 Acquisition Time 3.0000  
 Acquisition Date 2014-02-03T01:30:52  
 Spectrometer Frequency 499.70  
 Spectral Width 8000.0  
 Lowest Frequency -1016.3  
 Nucleus 1H  
 Acquired Size 24000  
 Spectral Size 65536

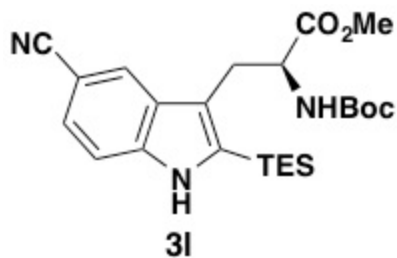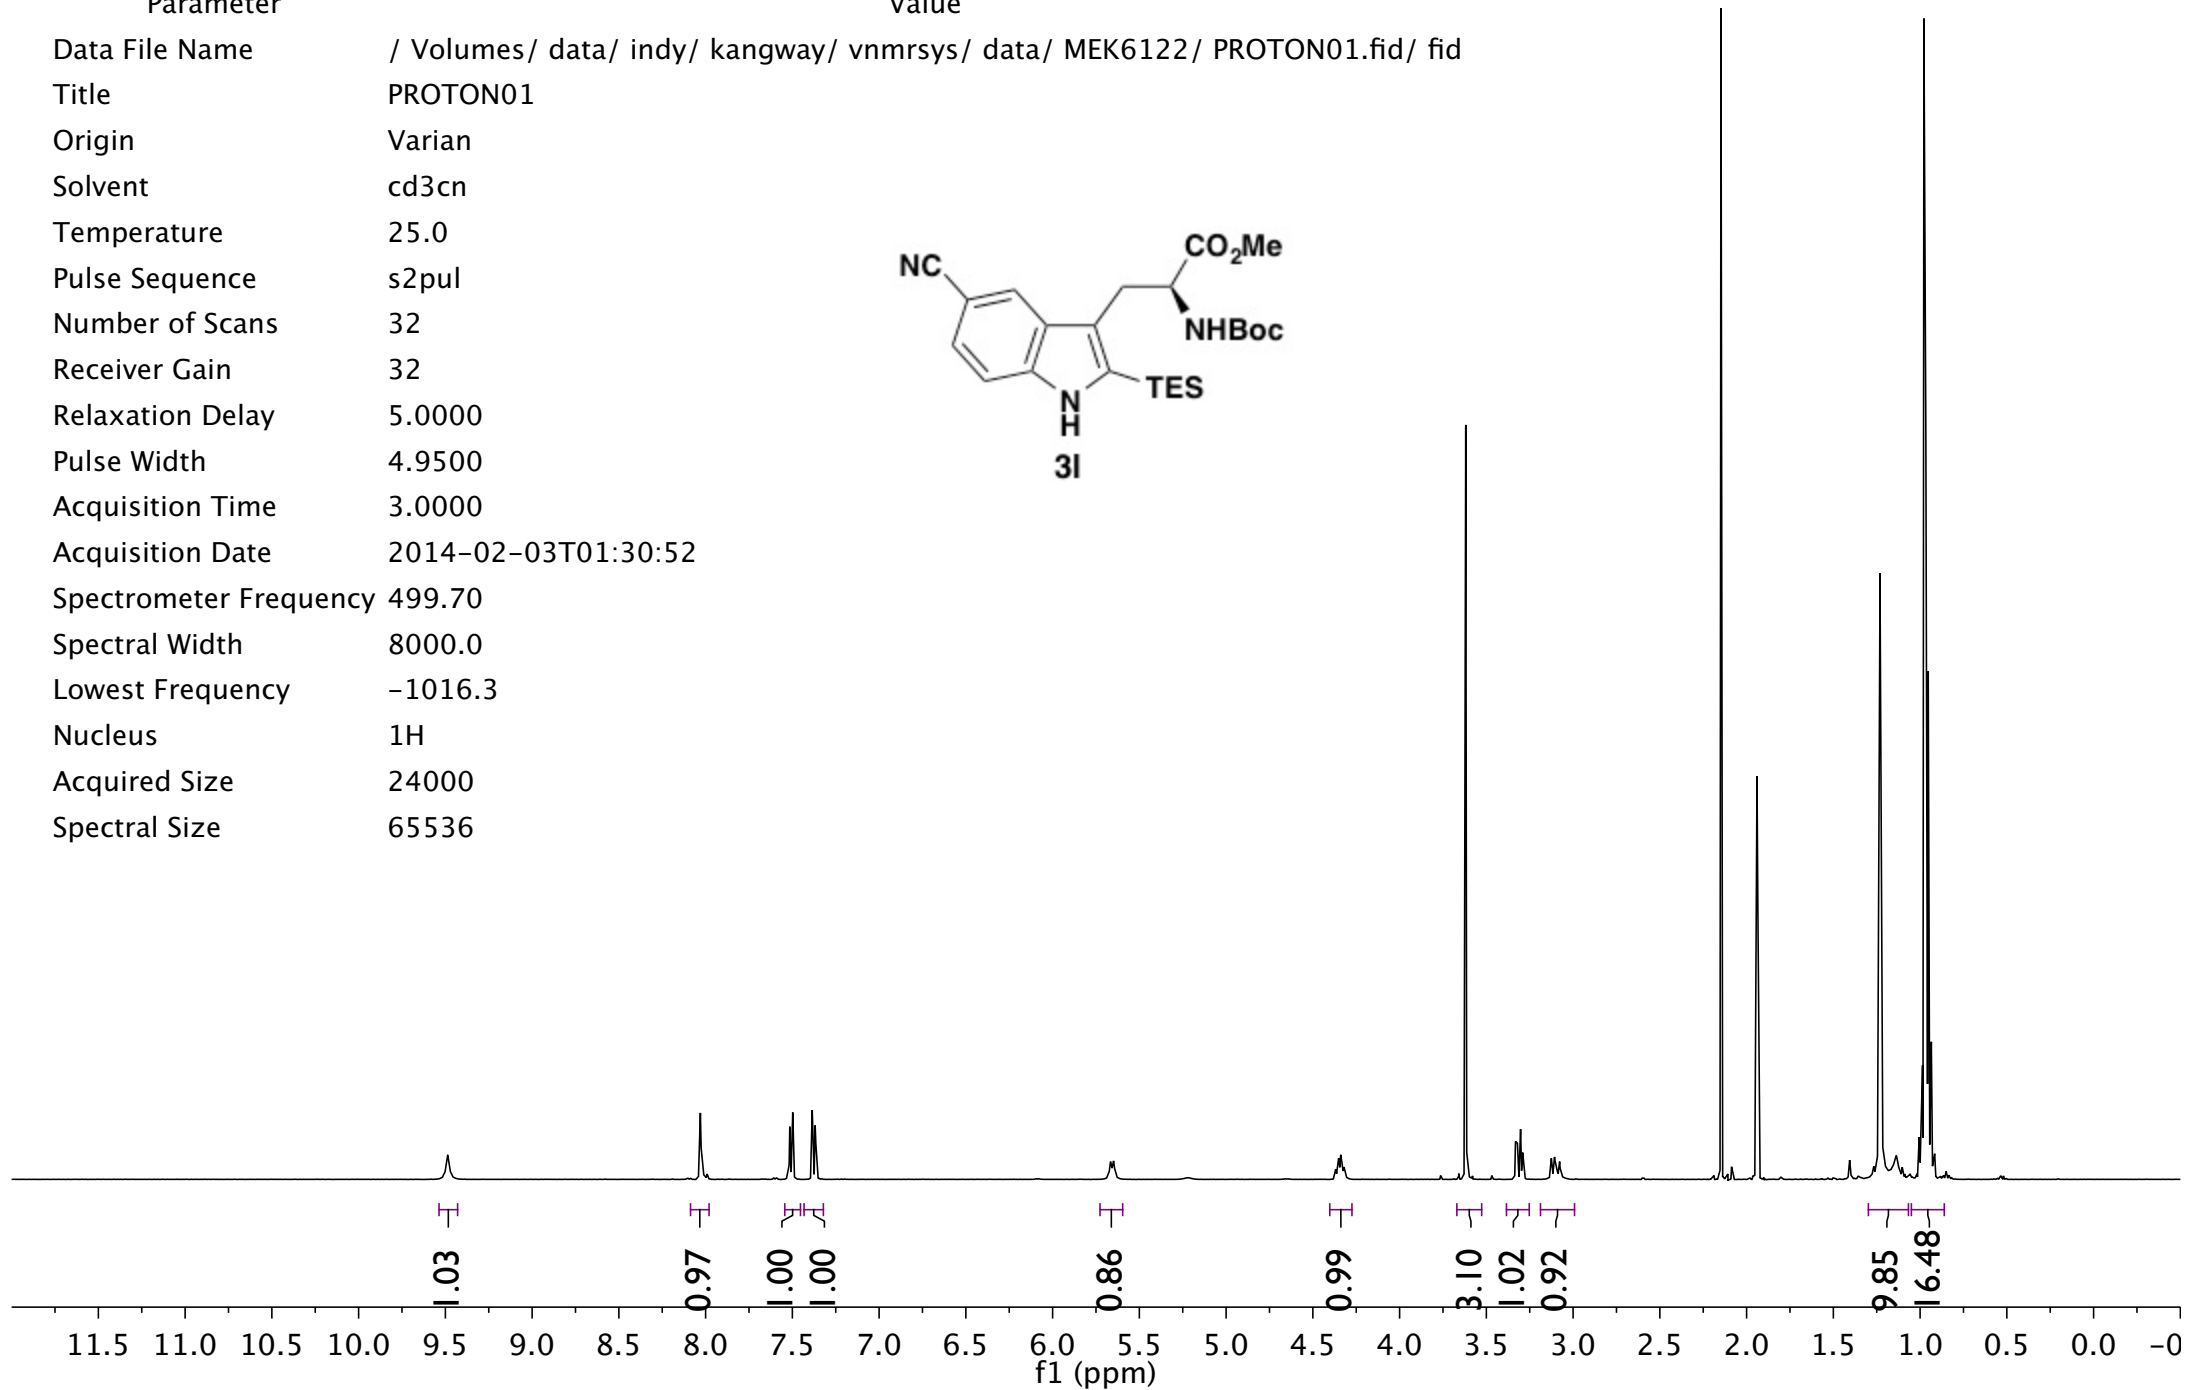

| Parameter              | Value                                                                     |
|------------------------|---------------------------------------------------------------------------|
| Data File Name         | / Volumes/ data/ indy/ kangway/ vnmrsys/ data/ MEK6122/ CARBON01.fid/ fid |
| Title                  | CARBON01                                                                  |
| Origin                 | Varian                                                                    |
| Solvent                | cd3cn                                                                     |
| Temperature            | 25.0                                                                      |
| Pulse Sequence         | s2pul                                                                     |
| Number of Scans        | 3000                                                                      |
| Receiver Gain          | 30                                                                        |
| Relaxation Delay       | 1.0000                                                                    |
| Pulse Width            | 4.2500                                                                    |
| Acquisition Time       | 1.0420                                                                    |
| Acquisition Date       | 2014-02-03T01:35:31                                                       |
| Spectrometer Frequency | 125.66                                                                    |
| Spectral Width         | 31446.5                                                                   |
| Lowest Frequency       | -1783.3                                                                   |
| Nucleus                | <sup>13</sup> C                                                           |
| Acquired Size          | 32768                                                                     |
| Spectral Size          | 65536                                                                     |

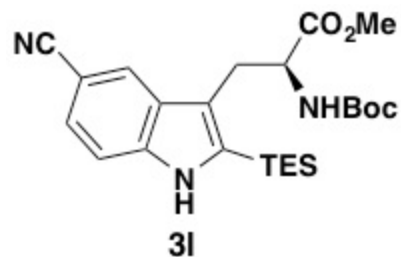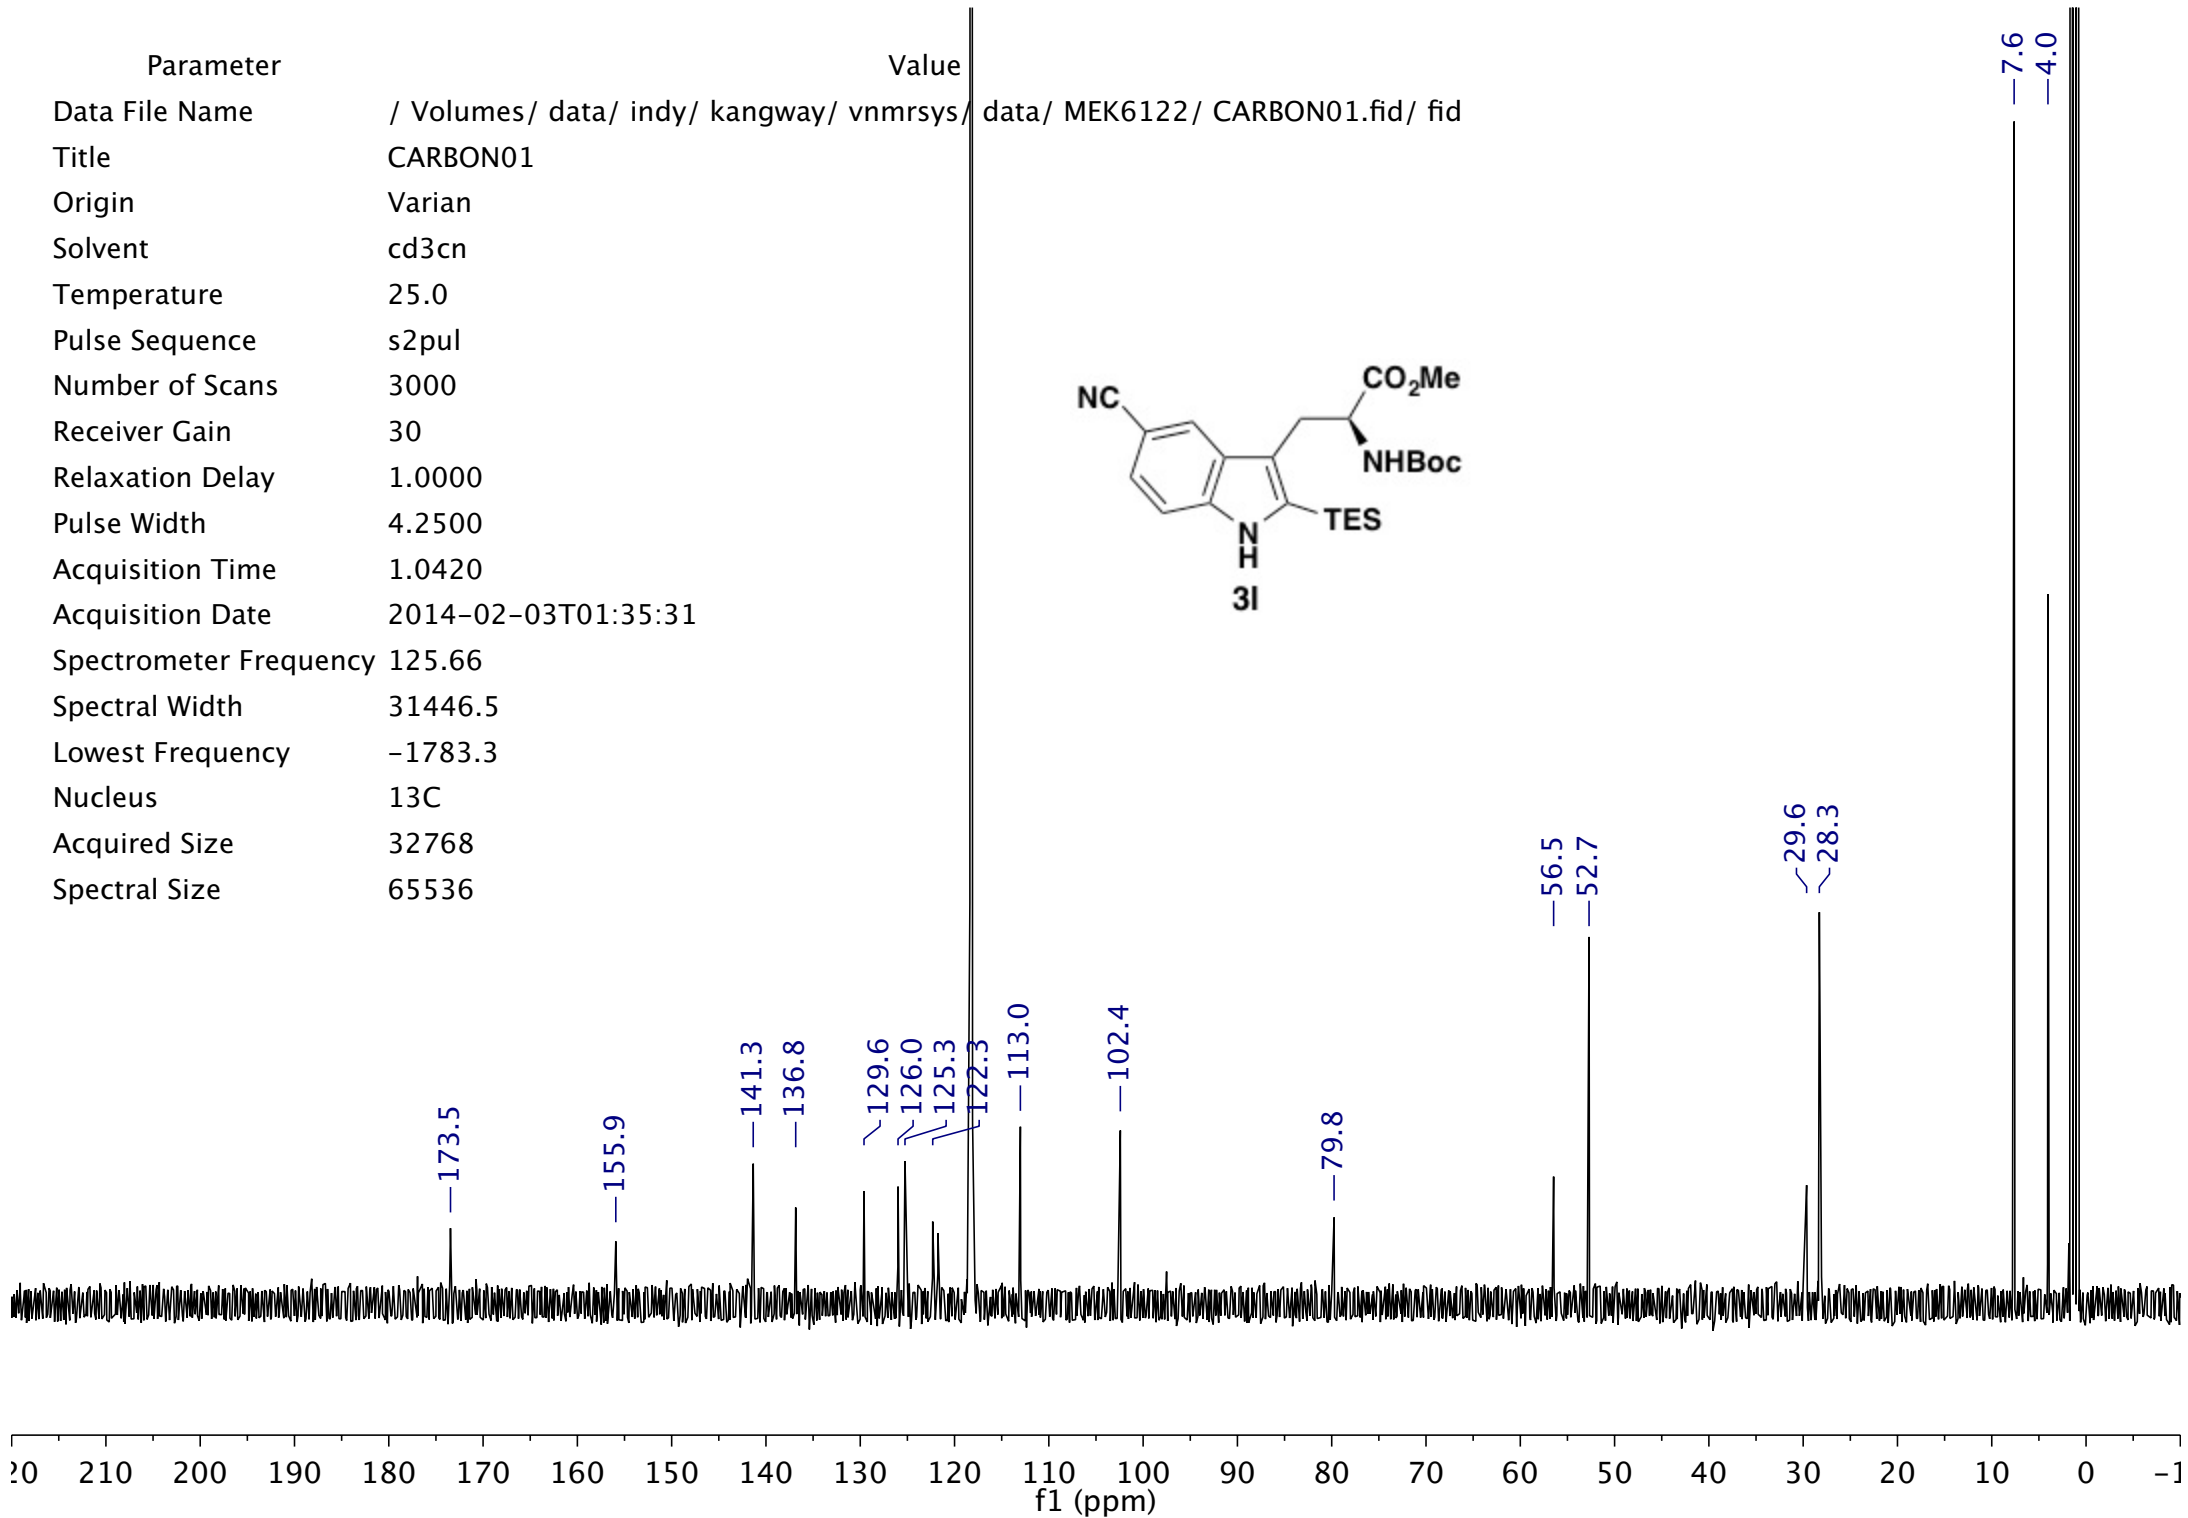

Parameter Value

Data File Name / Volumes/ data/ indy/ mkieffer/ vnmrsys/ data/ MEK6131/ PROTON02.fid/ fid  
 Title PROTON02  
 Origin Varian  
 Solvent cdcl3  
 Temperature 25.0  
 Pulse Sequence s2pul  
 Number of Scans 32  
 Receiver Gain 26  
 Relaxation Delay 5.0000  
 Pulse Width 4.9500  
 Acquisition Time 3.0000  
 Acquisition Date 2013-12-18T05:59:15  
 Spectrometer Frequency 499.70  
 Spectral Width 8000.0  
 Lowest Frequency -1004.3  
 Nucleus 1H  
 Acquired Size 24000  
 Spectral Size 65536

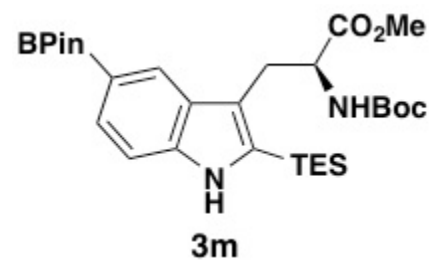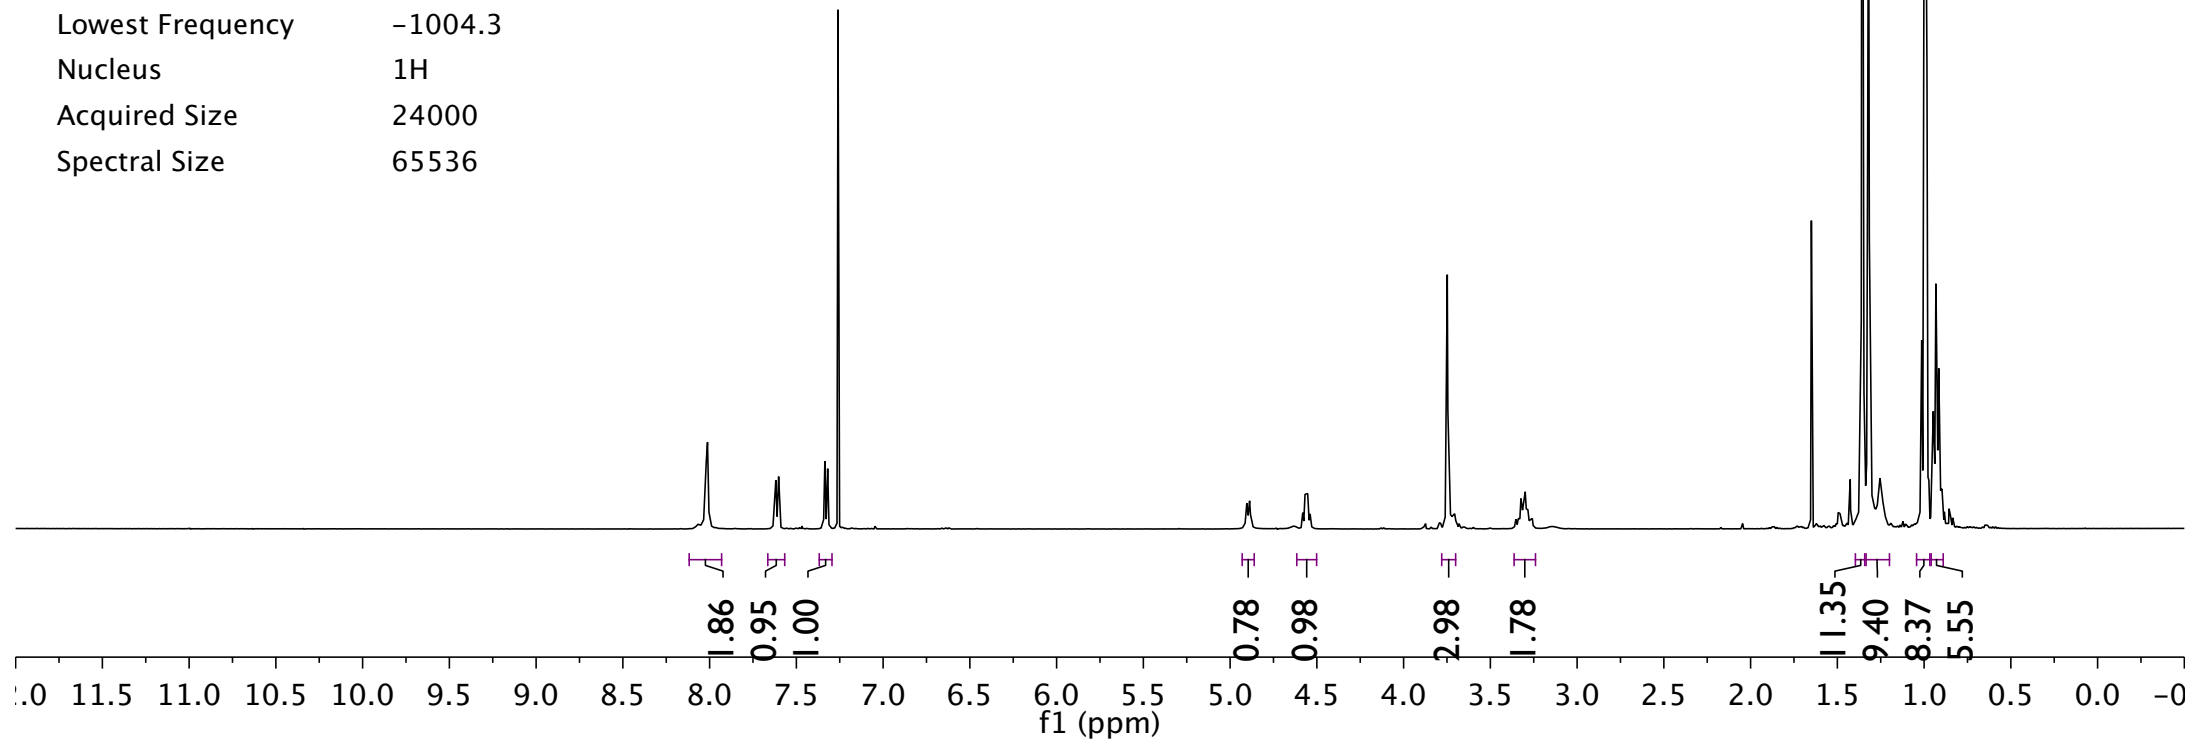

| Parameter              | Value                                                                      |
|------------------------|----------------------------------------------------------------------------|
| Data File Name         | / Volumes/ data/ indy/ mkieffer/ vnmrsys/ data/ MEK6131/ CARBON01 fid/ fid |
| Title                  | CARBON01                                                                   |
| Origin                 | Varian                                                                     |
| Solvent                | cdcl3                                                                      |
| Temperature            | 25.0                                                                       |
| Pulse Sequence         | s2pul                                                                      |
| Number of Scans        | 512                                                                        |
| Receiver Gain          | 30                                                                         |
| Relaxation Delay       | 1.0000                                                                     |
| Pulse Width            | 4.2500                                                                     |
| Acquisition Time       | 1.0420                                                                     |
| Acquisition Date       | 2013-12-18T06:03:46                                                        |
| Spectrometer Frequency | 125.66                                                                     |
| Spectral Width         | 31446.5                                                                    |
| Lowest Frequency       | -1883.2                                                                    |
| Nucleus                | <sup>13</sup> C                                                            |
| Acquired Size          | 32768                                                                      |
| Spectral Size          | 65536                                                                      |

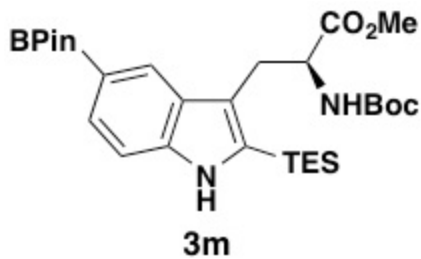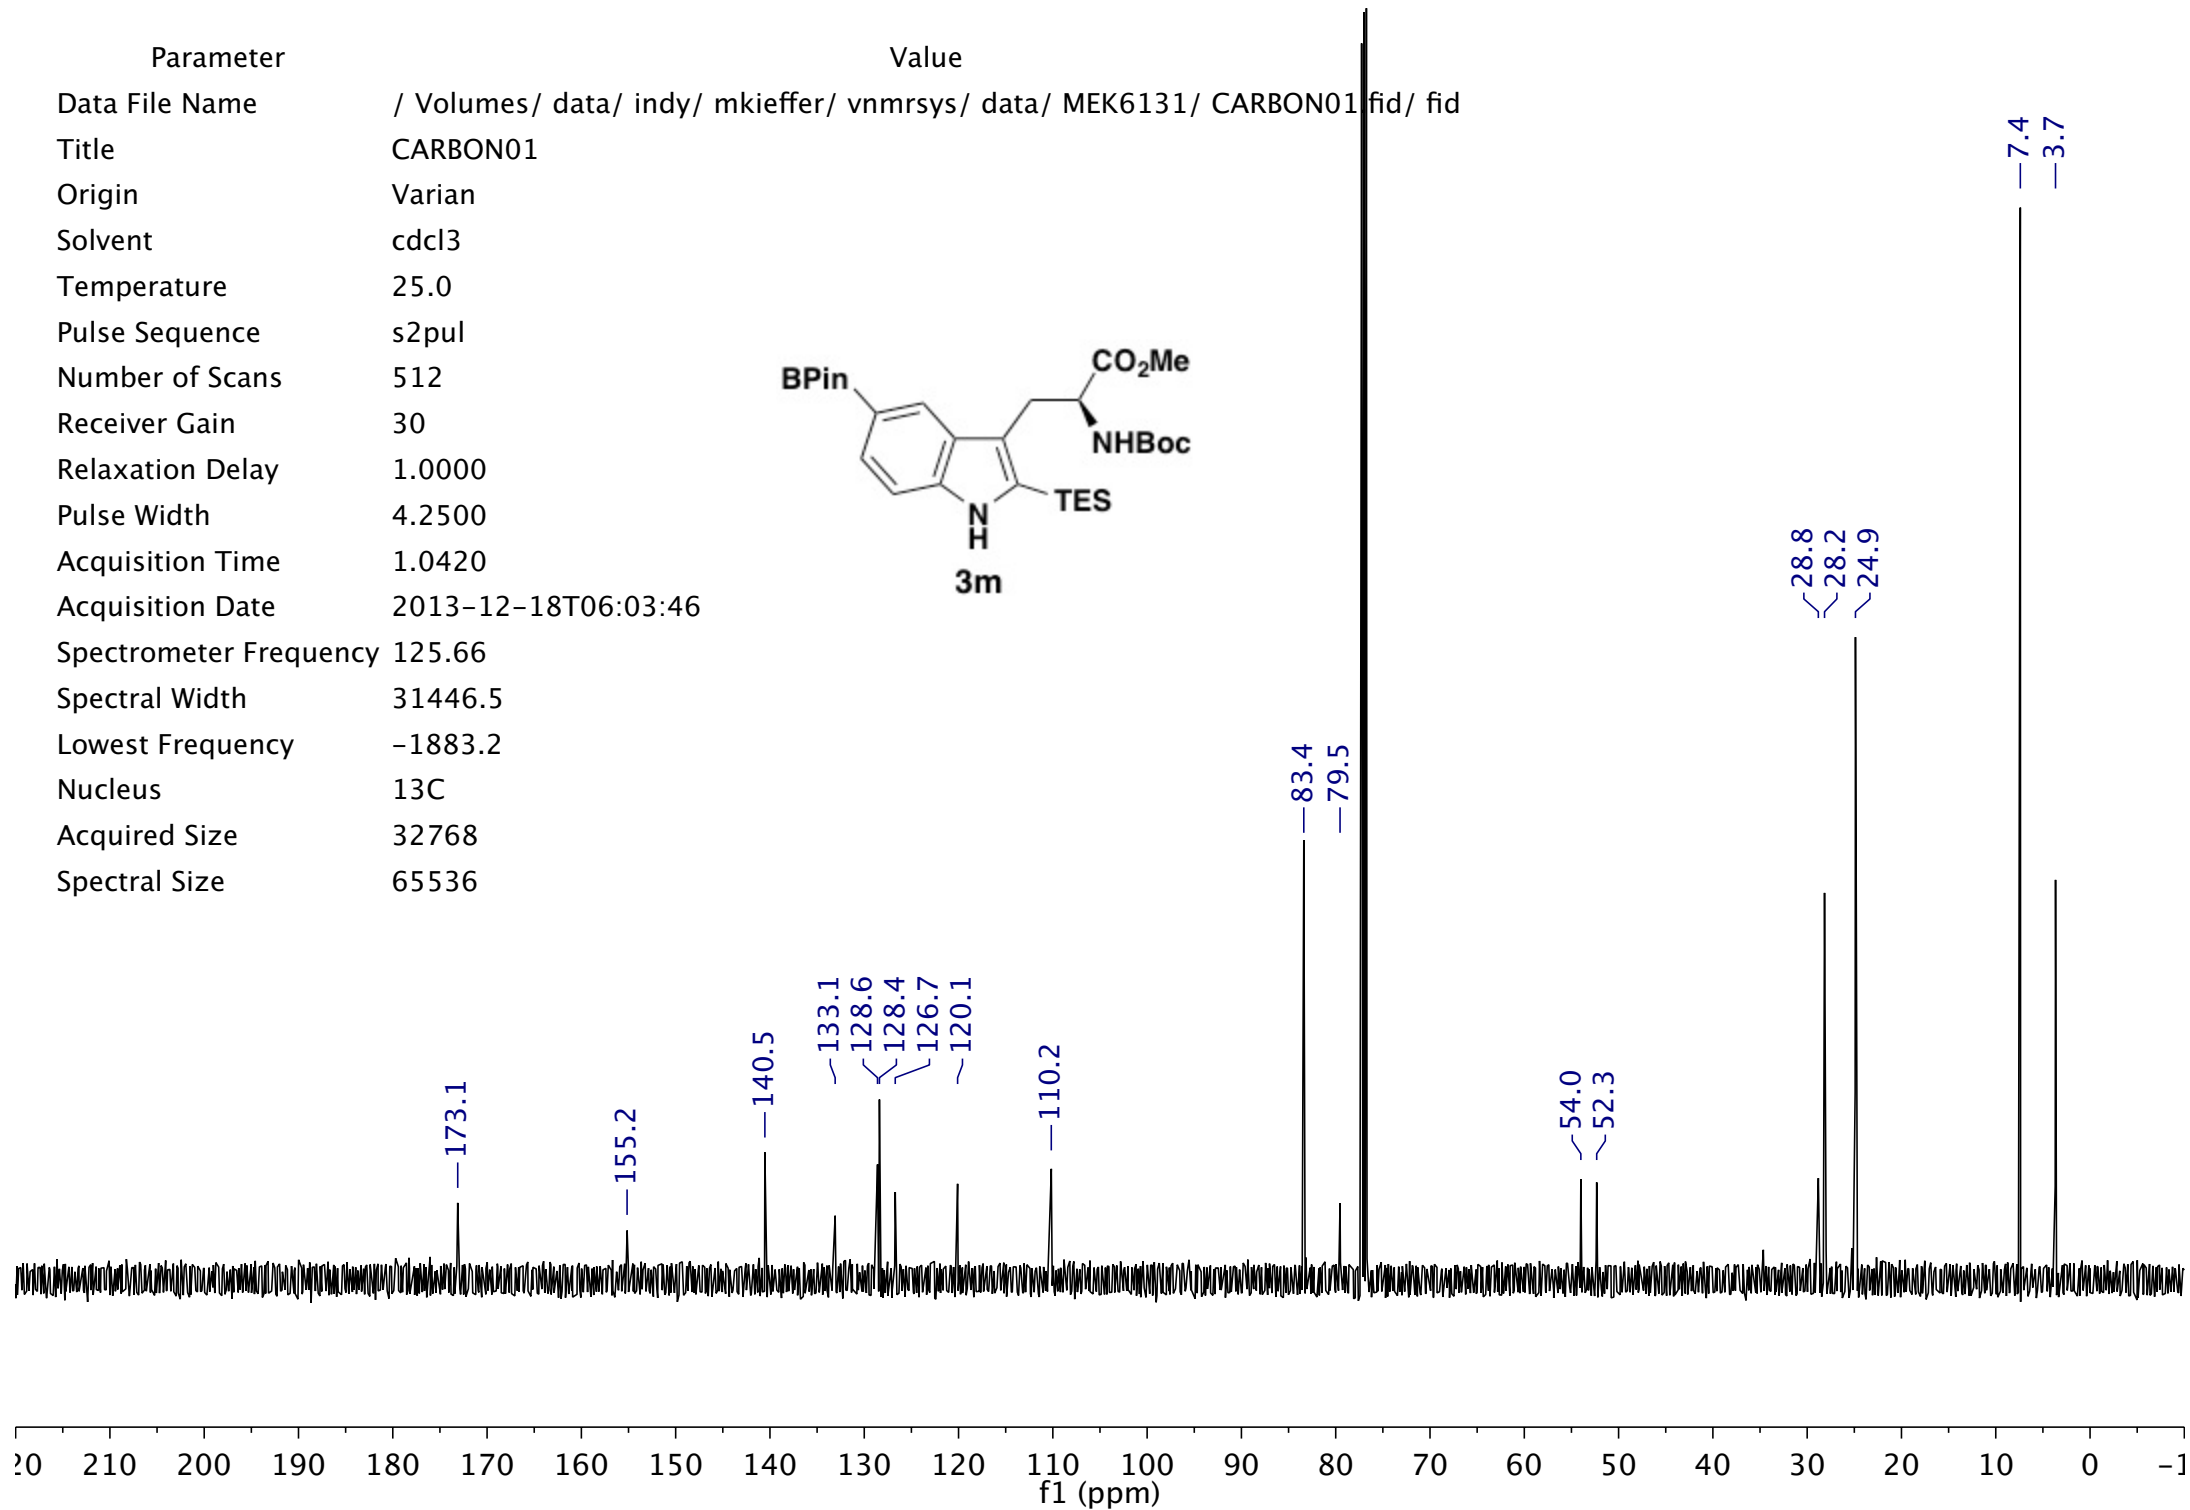

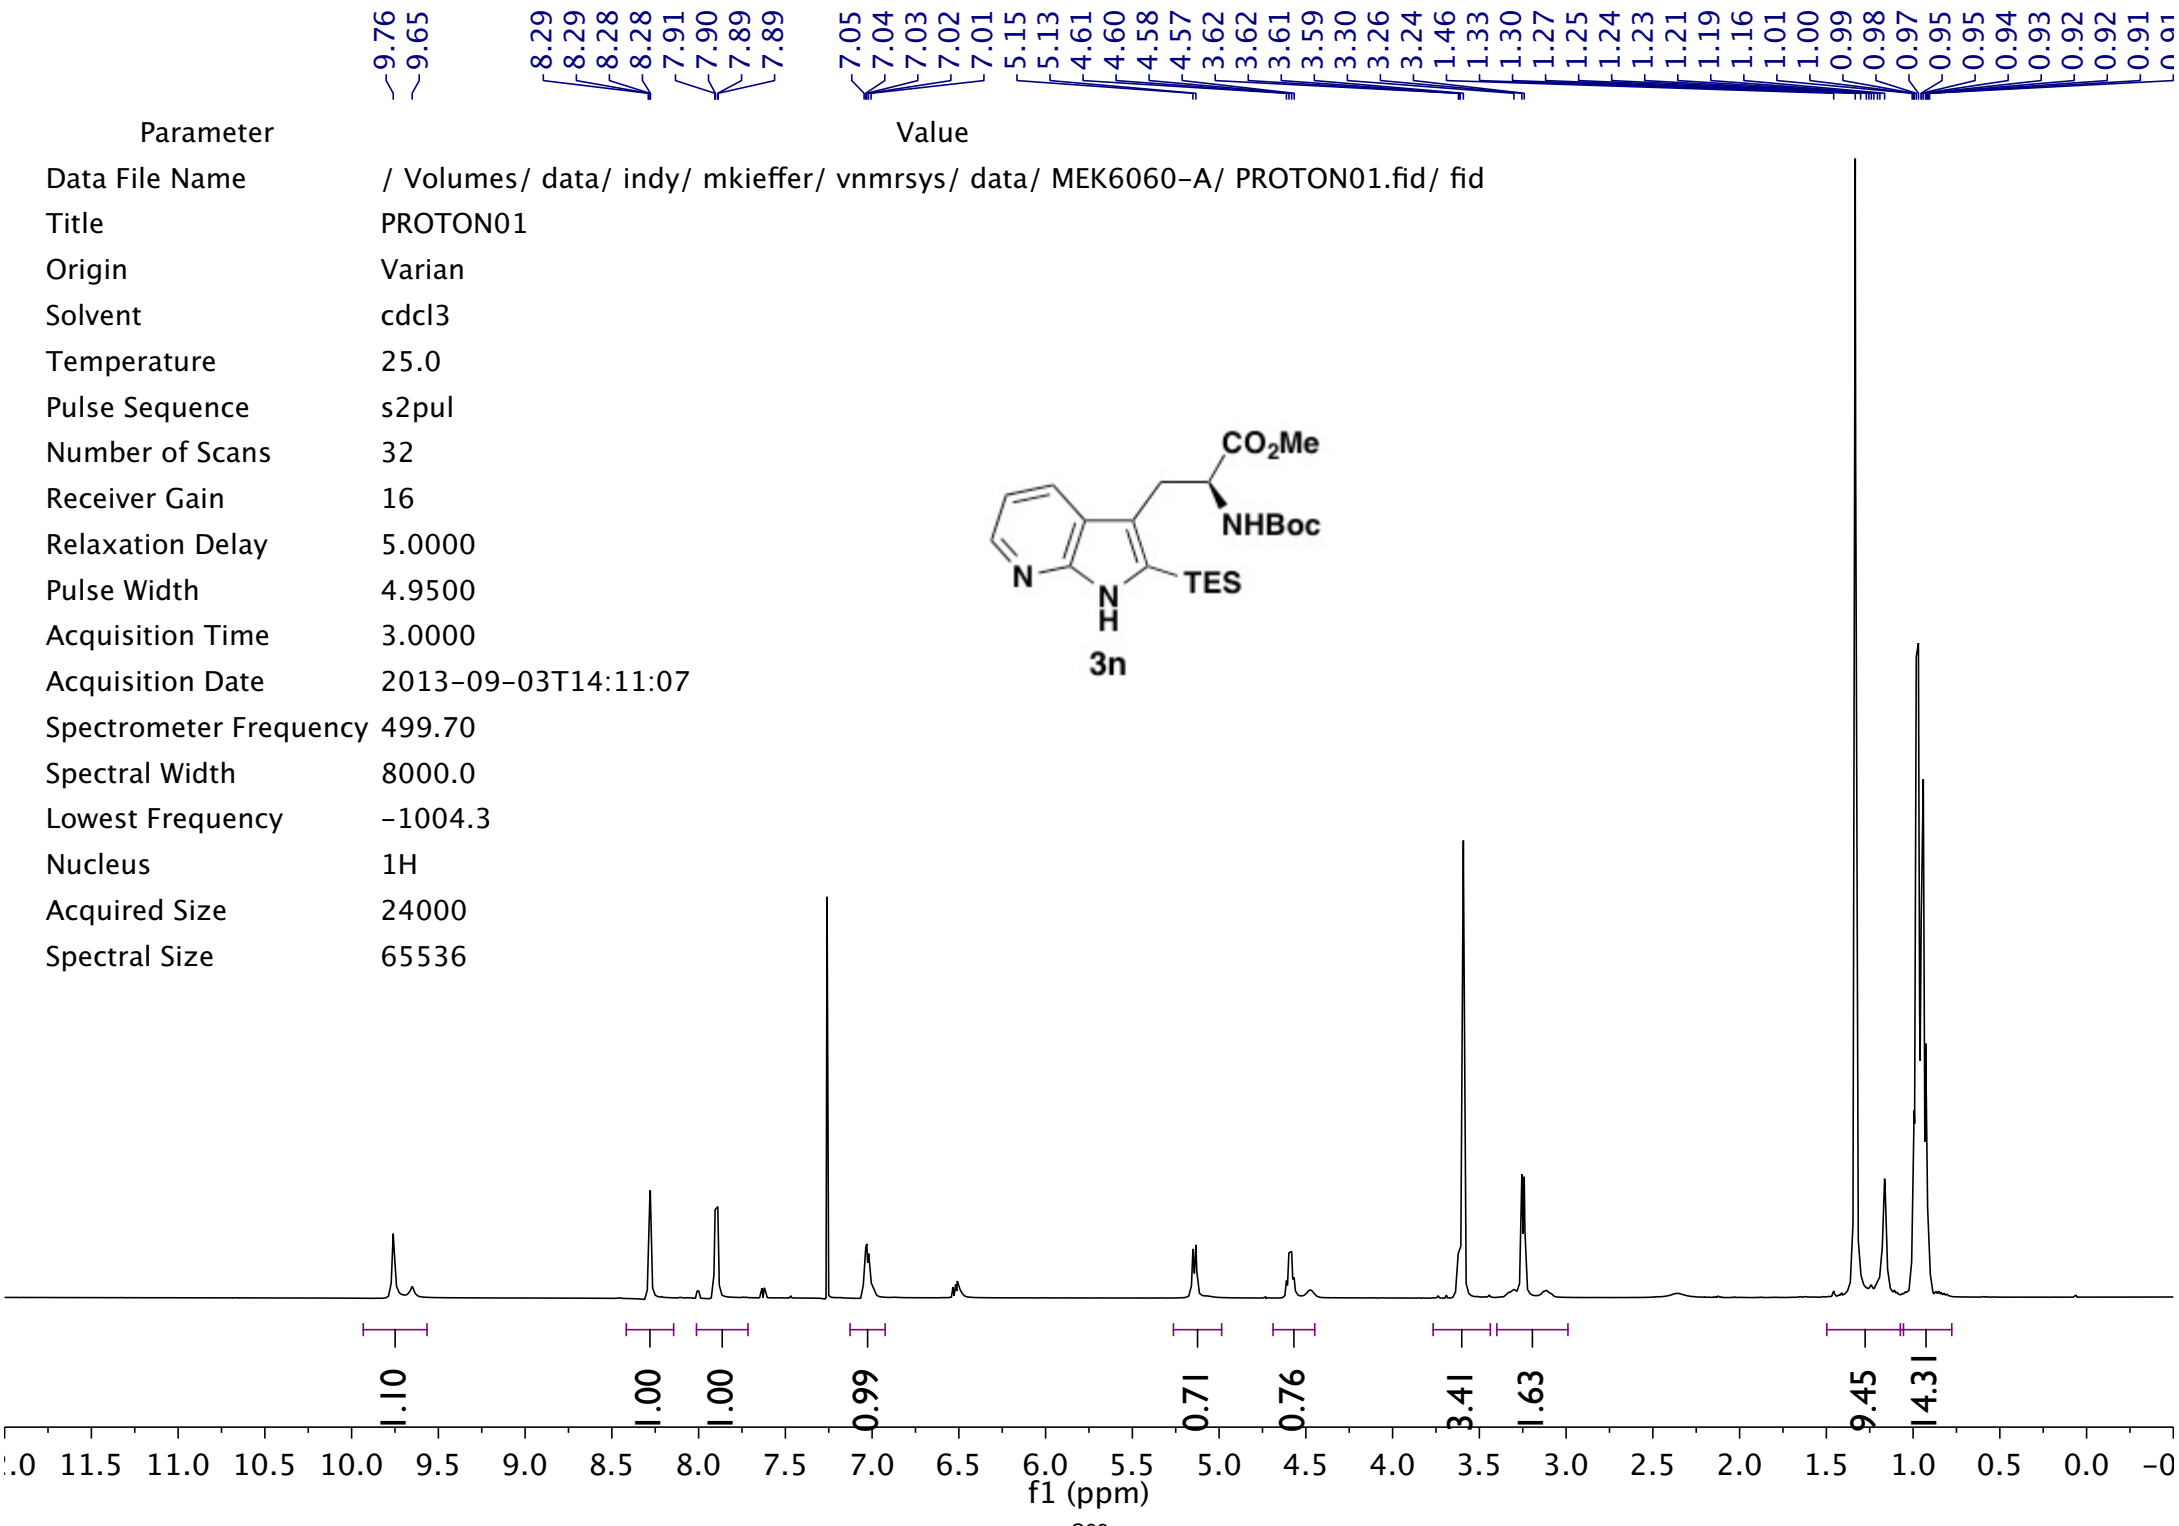

| Parameter              | Value                                                                       |
|------------------------|-----------------------------------------------------------------------------|
| Data File Name         | / Volumes/ data/ indy/ mkieffer/ vnmsys/ data/ MEK6060-A/ CARBON01.fid/ fid |
| Title                  | CARBON01                                                                    |
| Origin                 | Varian                                                                      |
| Solvent                | cdcl3                                                                       |
| Temperature            | 25.0                                                                        |
| Pulse Sequence         | s2pul                                                                       |
| Number of Scans        | 512                                                                         |
| Receiver Gain          | 30                                                                          |
| Relaxation Delay       | 1.0000                                                                      |
| Pulse Width            | 4.2500                                                                      |
| Acquisition Time       | 1.0420                                                                      |
| Acquisition Date       | 2013-09-03T14:15:38                                                         |
| Spectrometer Frequency | 125.66                                                                      |
| Spectral Width         | 31446.5                                                                     |
| Lowest Frequency       | -1887.6                                                                     |
| Nucleus                | <sup>13</sup> C                                                             |
| Acquired Size          | 32768                                                                       |
| Spectral Size          | 65536                                                                       |

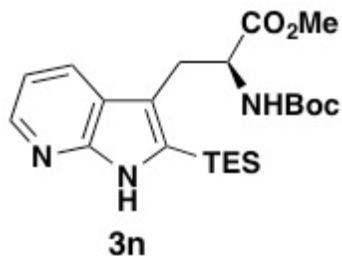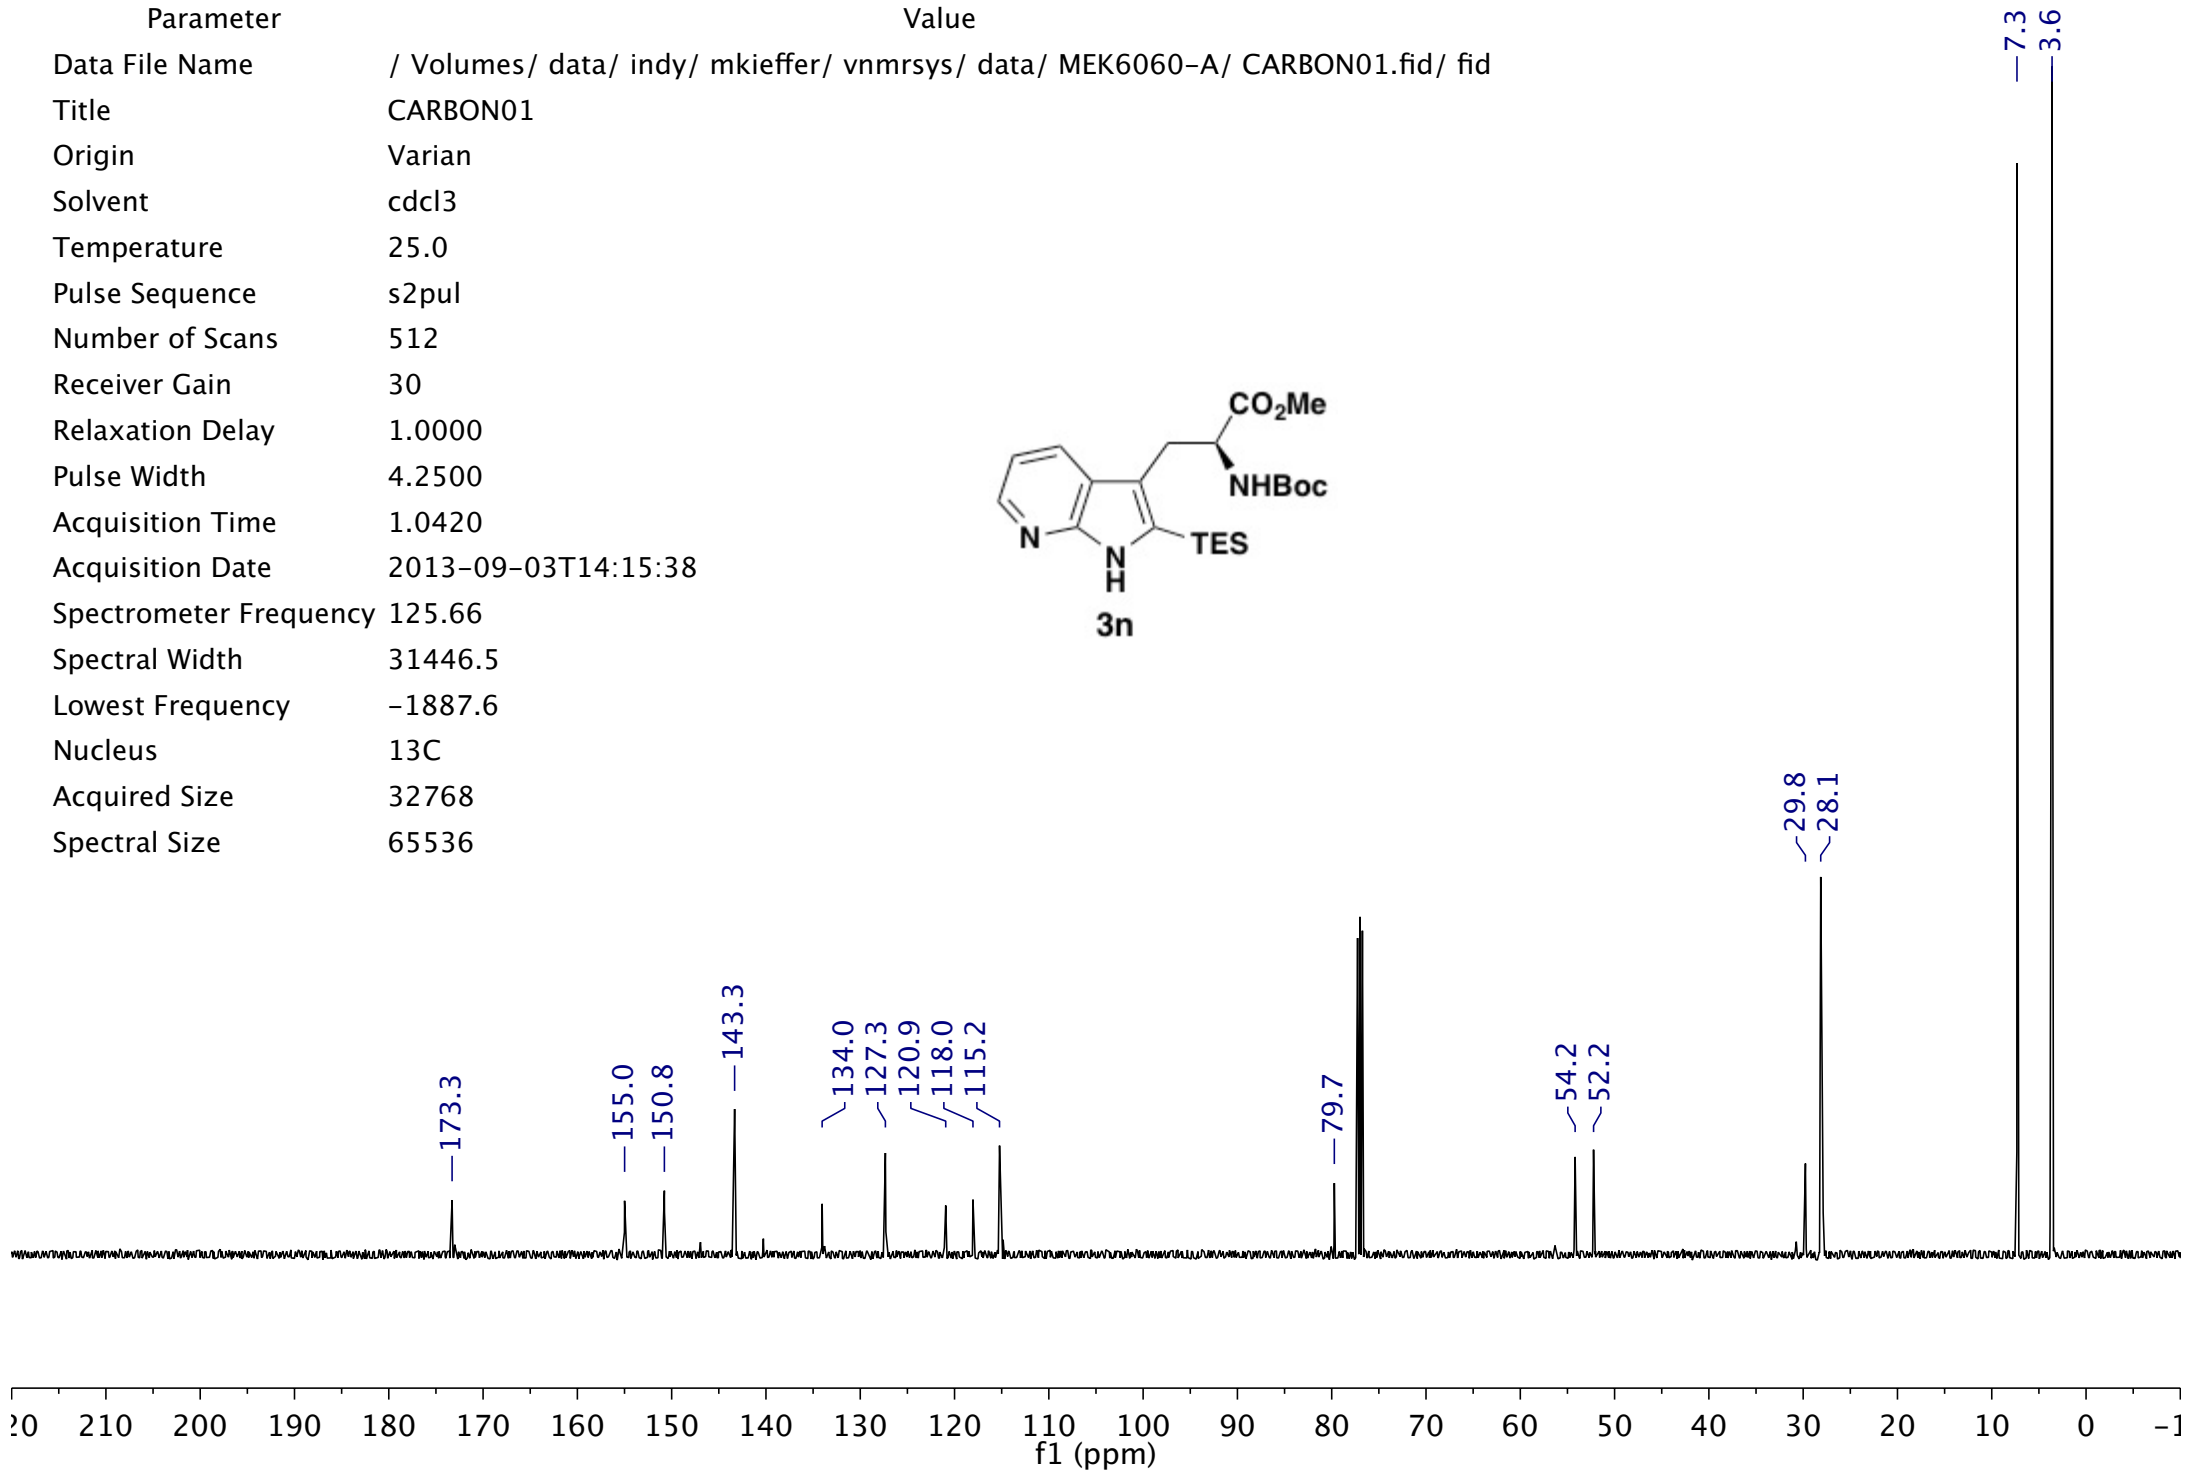

9.78 8.79 8.79 8.78 8.78 8.77 8.77 8.76 8.76 8.75 8.75 8.75 8.75 7.87 7.87 7.85 7.85 7.64 7.64 7.62 7.62 7.48 7.47 7.47 7.46 5.60 5.59 4.42 4.41 4.39 4.38 3.57 3.39 3.39 3.39 3.38 3.38 3.36 3.35 3.24 3.22 3.21 3.19 1.26 1.17 1.02 1.01 1.00 0.99 0.98 0.97 0.97

| Parameter              | Value                                                                      |
|------------------------|----------------------------------------------------------------------------|
| Data File Name         | / Volumes/ data/ indy/ mkieffer/ vnmrsys/ data/ MEK6146/ PROTON01.fid/ fid |
| Title                  | PROTON01                                                                   |
| Origin                 | Varian                                                                     |
| Solvent                | cd3cn                                                                      |
| Temperature            | 25.0                                                                       |
| Pulse Sequence         | s2pul                                                                      |
| Number of Scans        | 32                                                                         |
| Receiver Gain          | 26                                                                         |
| Relaxation Delay       | 5.0000                                                                     |
| Pulse Width            | 4.9500                                                                     |
| Acquisition Time       | 3.0000                                                                     |
| Acquisition Date       | 2014-01-22T14:02:41                                                        |
| Spectrometer Frequency | 499.70                                                                     |
| Spectral Width         | 8000.0                                                                     |
| Lowest Frequency       | -1016.3                                                                    |
| Nucleus                | 1H                                                                         |
| Acquired Size          | 24000                                                                      |
| Spectral Size          | 65536                                                                      |

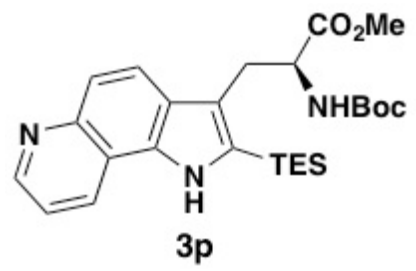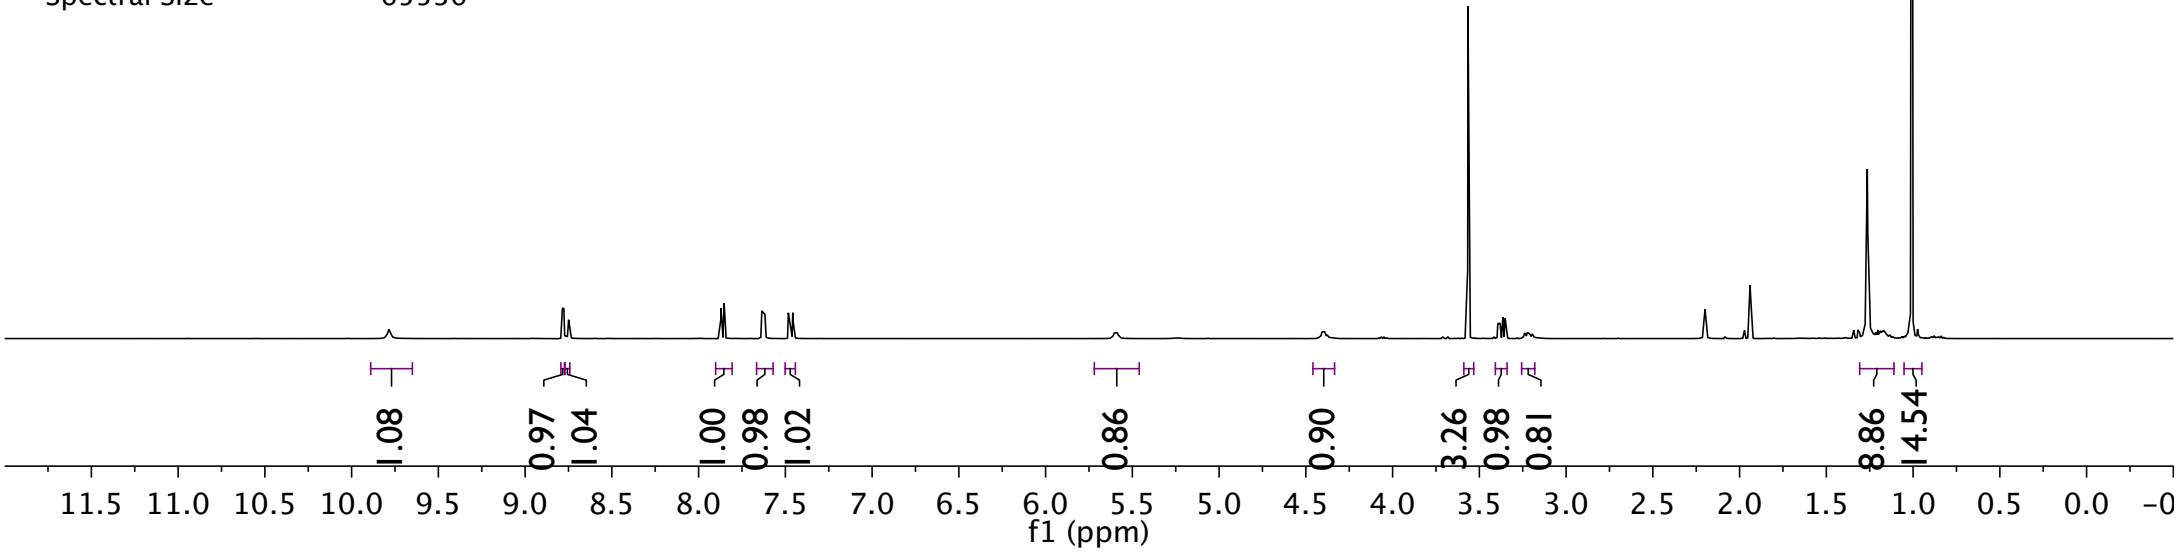

| Parameter              | Value                                                                      |
|------------------------|----------------------------------------------------------------------------|
| Data File Name         | / Volumes/ data/ indy/ mkieffer/ vnmrsys/ data/ MEK6146/ CARBON01.fid/ fid |
| Title                  | CARBON01                                                                   |
| Origin                 | Varian                                                                     |
| Solvent                | cd3cn                                                                      |
| Temperature            | 25.0                                                                       |
| Pulse Sequence         | s2pul                                                                      |
| Number of Scans        | 1000                                                                       |
| Receiver Gain          | 30                                                                         |
| Relaxation Delay       | 1.0000                                                                     |
| Pulse Width            | 4.2500                                                                     |
| Acquisition Time       | 1.0420                                                                     |
| Acquisition Date       | 2014-01-22T14:07:19                                                        |
| Spectrometer Frequency | 125.66                                                                     |
| Spectral Width         | 31446.5                                                                    |
| Lowest Frequency       | -1783.3                                                                    |
| Nucleus                | <sup>13</sup> C                                                            |
| Acquired Size          | 32768                                                                      |
| Spectral Size          | 65536                                                                      |

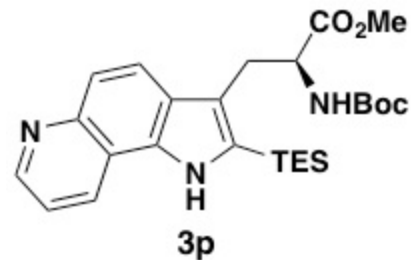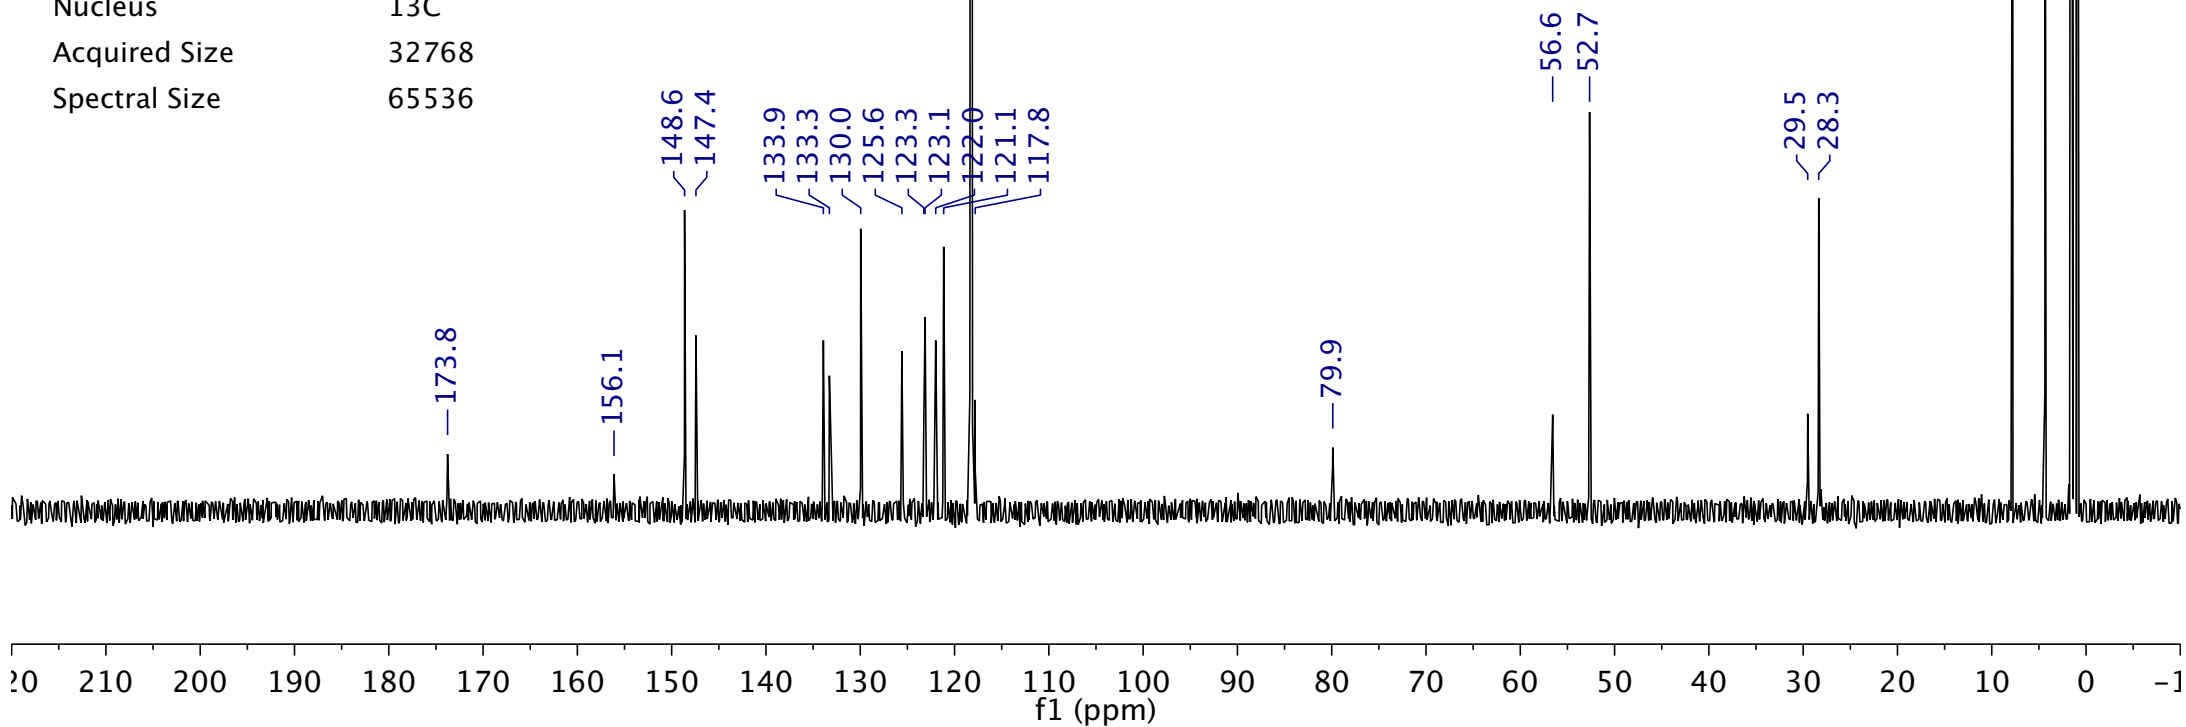





| Parameter              | Value                                                                        |
|------------------------|------------------------------------------------------------------------------|
| Data File Name         | / Volumes/ data/ indy/ mkieffer/ vnmrsys/ data/ MEK6067-A/ CARBON01.fid/ fid |
| Title                  | CARBON01                                                                     |
| Origin                 | Varian                                                                       |
| Solvent                | cdcl3                                                                        |
| Temperature            | 25.0                                                                         |
| Pulse Sequence         | s2pul                                                                        |
| Number of Scans        | 512                                                                          |
| Receiver Gain          | 30                                                                           |
| Relaxation Delay       | 1.0000                                                                       |
| Pulse Width            | 4.2500                                                                       |
| Acquisition Time       | 1.0420                                                                       |
| Acquisition Date       | 2013-09-30T22:37:02                                                          |
| Spectrometer Frequency | 125.66                                                                       |
| Spectral Width         | 31446.5                                                                      |
| Lowest Frequency       | -1885.7                                                                      |
| Nucleus                | <sup>13</sup> C                                                              |
| Acquired Size          | 32768                                                                        |
| Spectral Size          | 65536                                                                        |

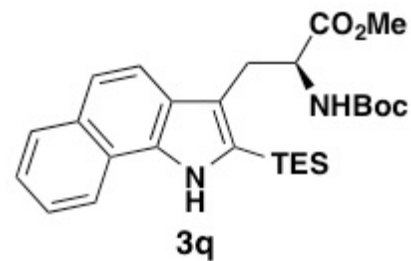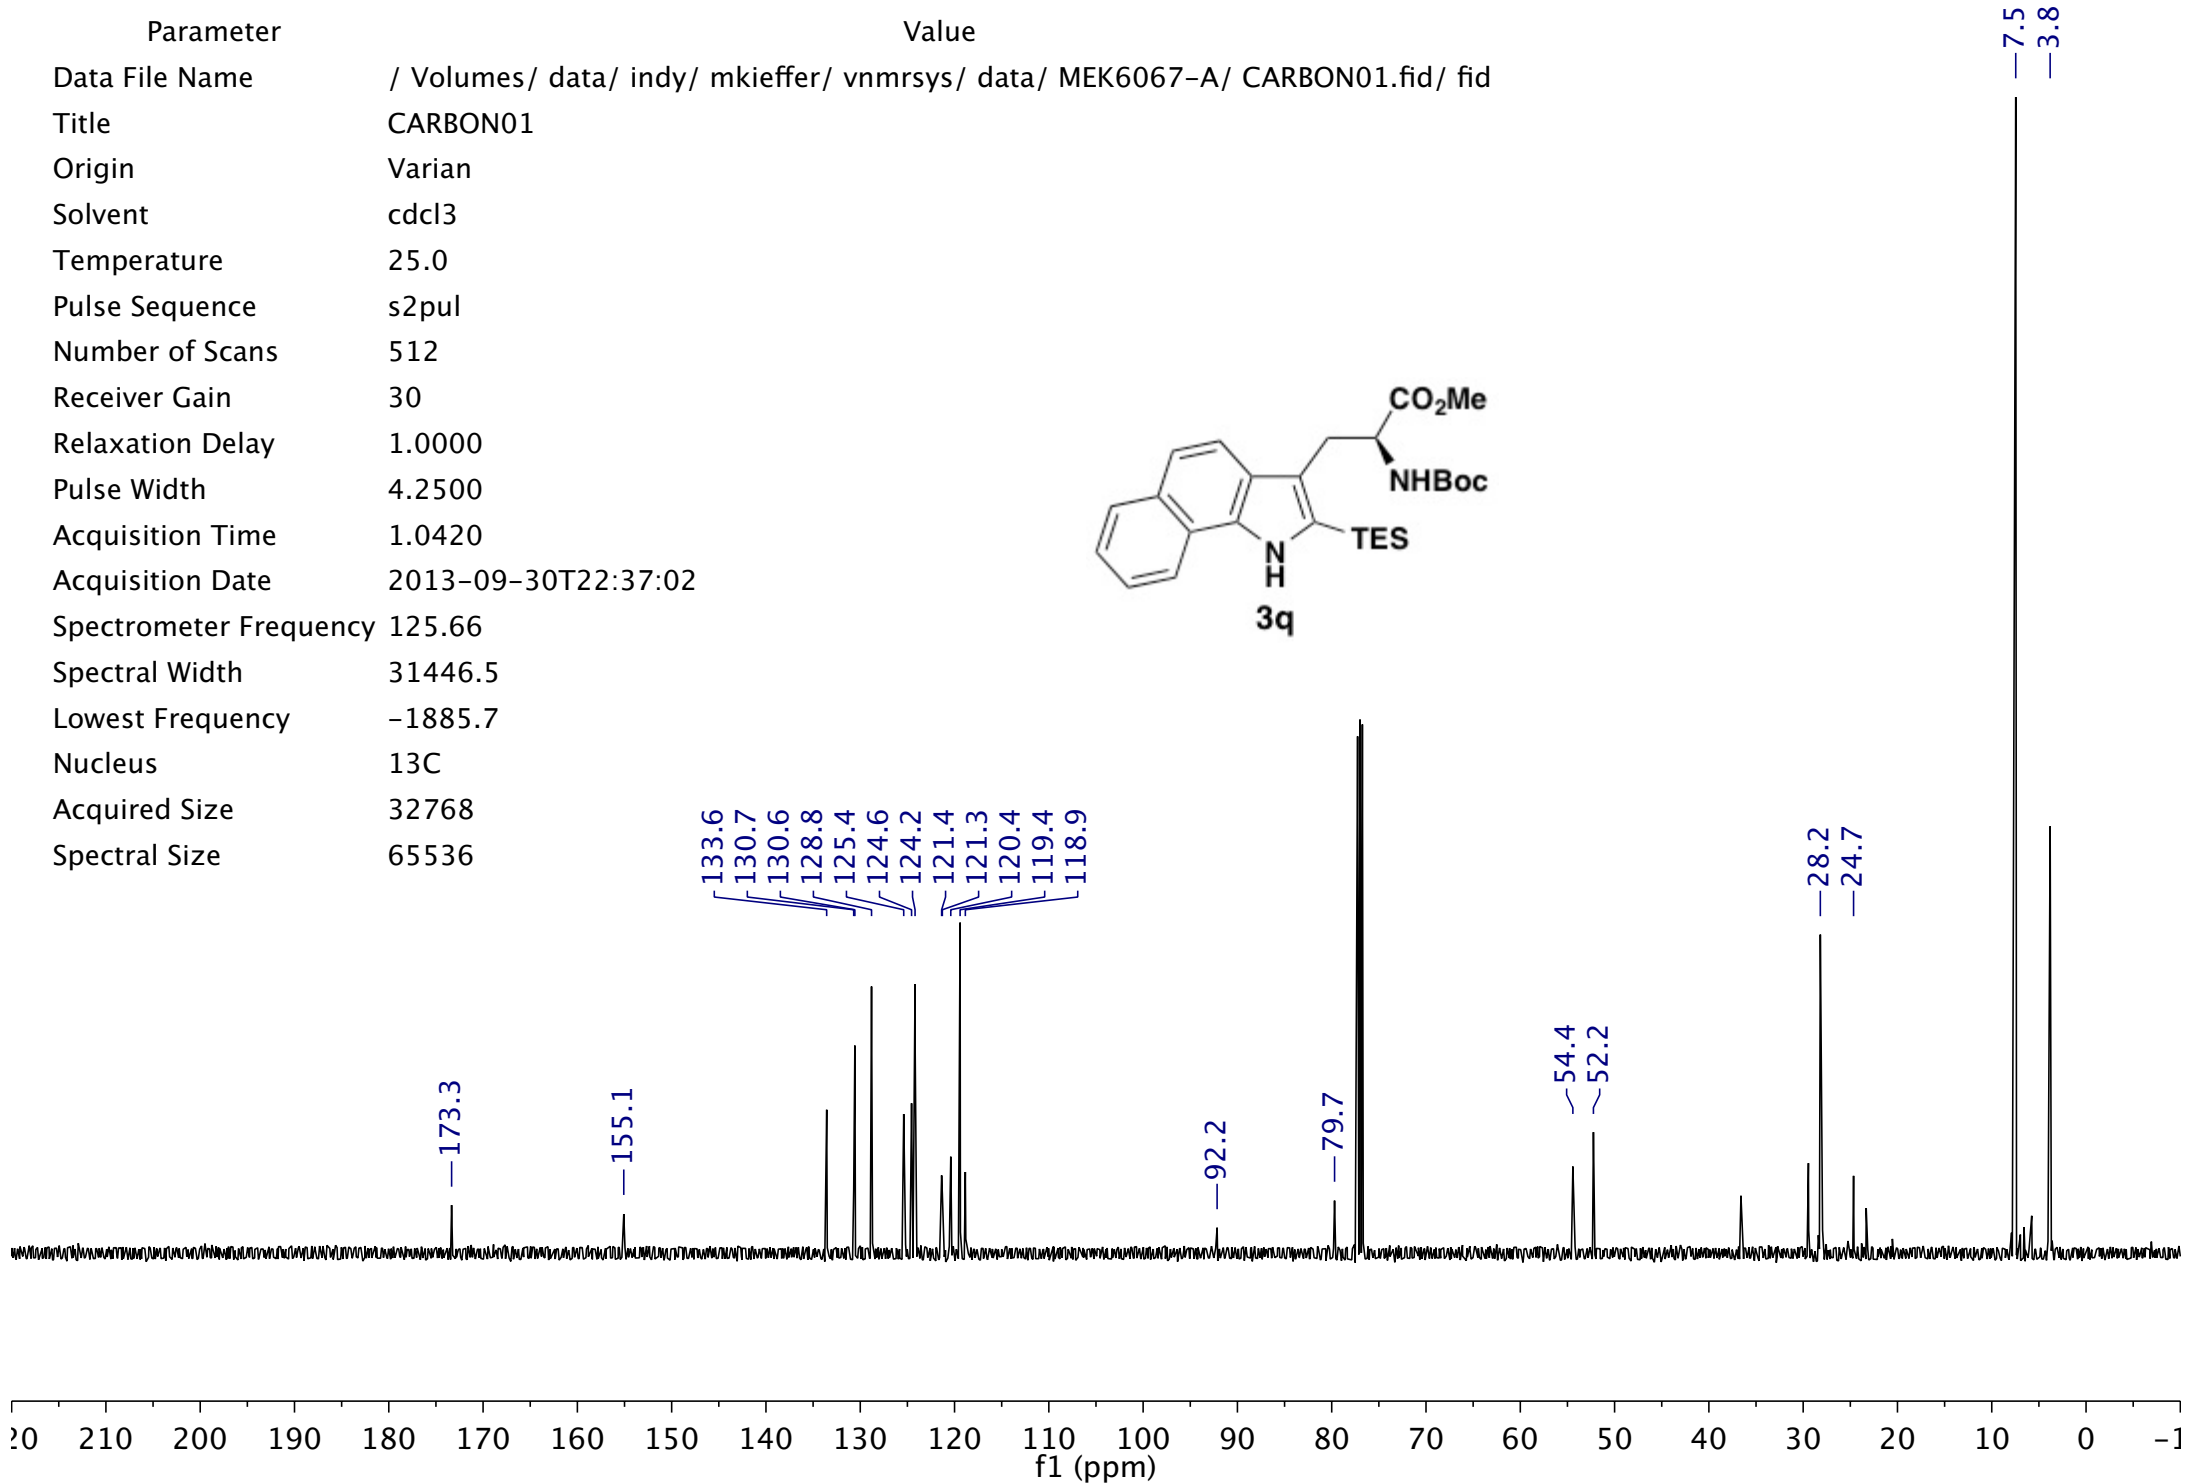

Parameter Value

Data File Name / Volumes/ data/ indy/ kangway/ vnmrsys/ data/ MEK6140-A/ PROTON01.fid/ fid  
 Title PROTON01  
 Origin Varian  
 Solvent cd3cn  
 Temperature 25.0  
 Pulse Sequence s2pul  
 Number of Scans 32  
 Receiver Gain 28  
 Relaxation Delay 5.0000  
 Pulse Width 4.9500  
 Acquisition Time 3.0000  
 Acquisition Date 2014-02-02T23:36:25  
 Spectrometer Frequency 499.70  
 Spectral Width 8000.0  
 Lowest Frequency -1016.3  
 Nucleus 1H  
 Acquired Size 24000  
 Spectral Size 65536

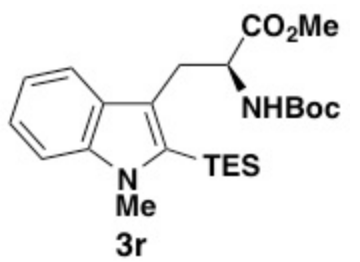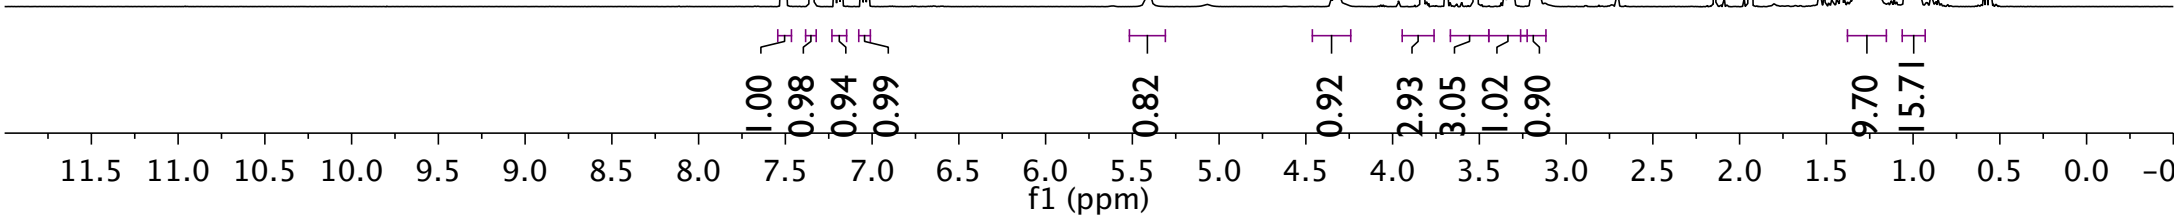

| Parameter              | Value                                                                       |
|------------------------|-----------------------------------------------------------------------------|
| Data File Name         | / Volumes/ data/ indy/ kangway/ vnmrsys/ data/ MEK6140-A/ CARBON01.fid/ fid |
| Title                  | CARBON01                                                                    |
| Origin                 | Varian                                                                      |
| Solvent                | cd3cn                                                                       |
| Temperature            | 25.0                                                                        |
| Pulse Sequence         | s2pul                                                                       |
| Number of Scans        | 3000                                                                        |
| Receiver Gain          | 30                                                                          |
| Relaxation Delay       | 1.0000                                                                      |
| Pulse Width            | 4.2500                                                                      |
| Acquisition Time       | 1.0420                                                                      |
| Acquisition Date       | 2014-02-02T23:41:03                                                         |
| Spectrometer Frequency | 125.66                                                                      |
| Spectral Width         | 31446.5                                                                     |
| Lowest Frequency       | -1782.6                                                                     |
| Nucleus                | <sup>13</sup> C                                                             |
| Acquired Size          | 32768                                                                       |
| Spectral Size          | 65536                                                                       |

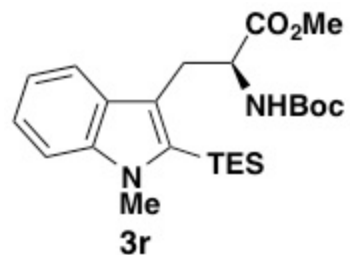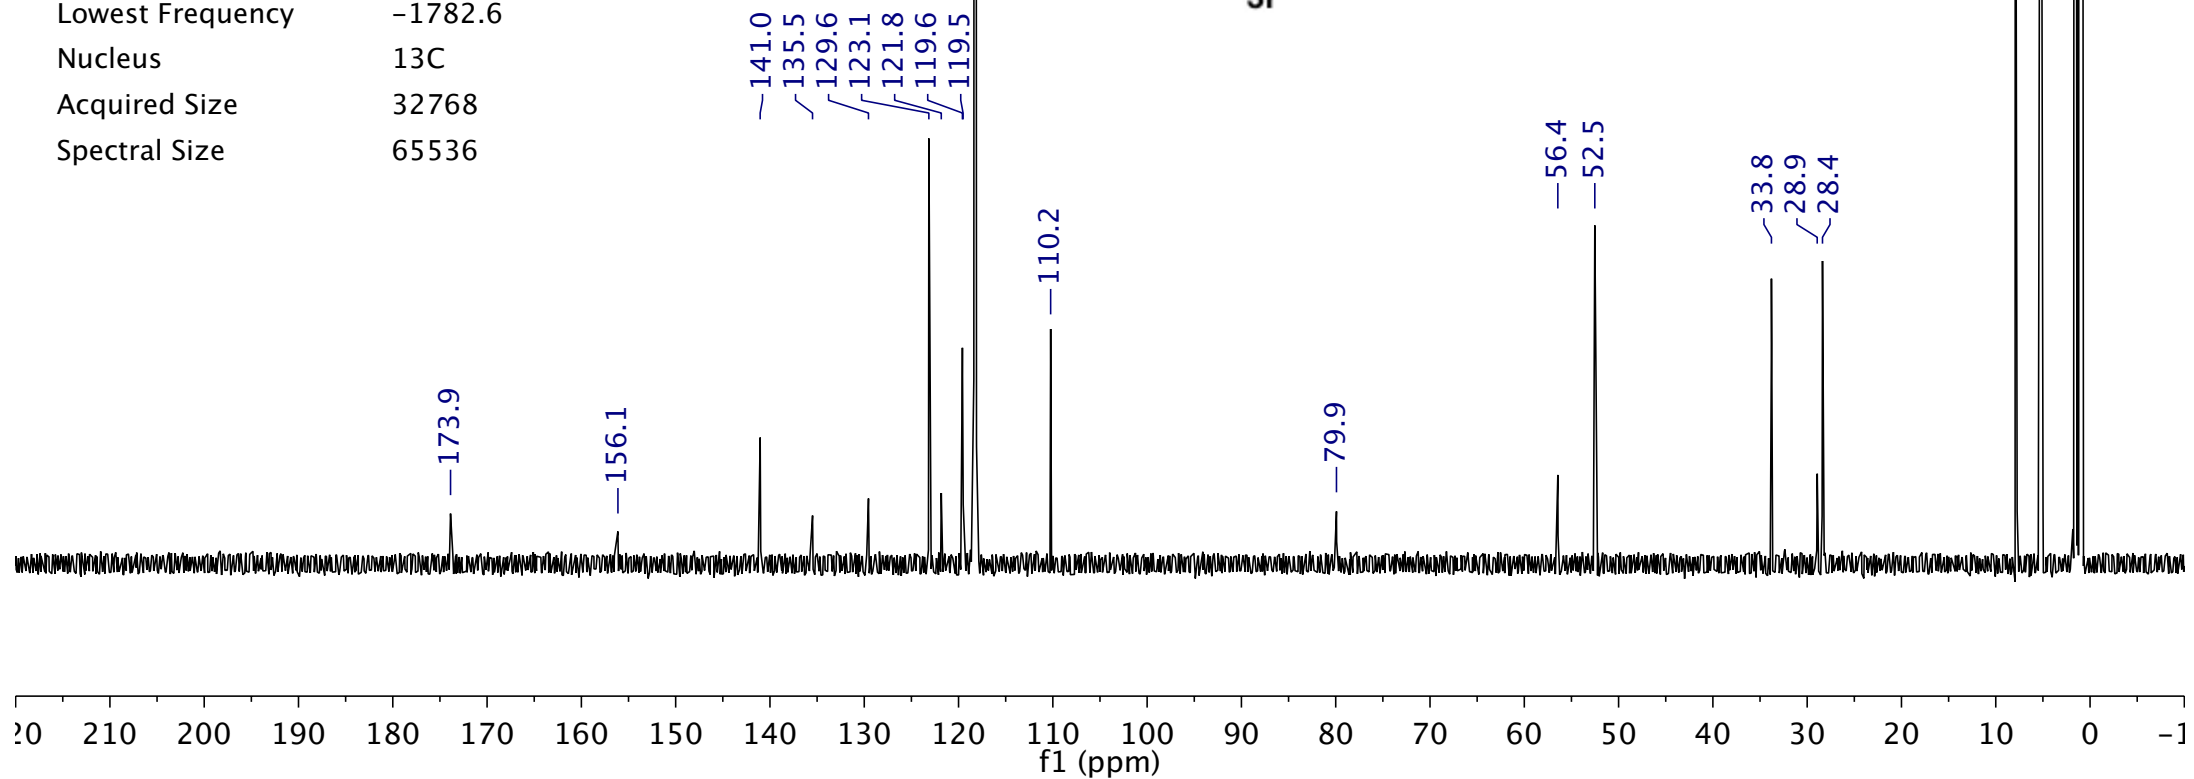

7.63  
7.63  
7.62  
7.57  
7.56  
7.56  
7.55  
7.55  
7.55  
7.55  
7.54  
7.54  
7.54  
7.53  
7.53  
7.53  
7.52  
7.52  
7.52  
7.51  
7.51  
7.40  
7.39  
7.39  
7.38  
7.38  
7.38  
7.37  
7.37  
7.36  
7.36  
7.31  
7.24  
7.24  
7.22  
7.22  
7.22  
7.21  
7.21  
7.18  
7.18  
7.17  
7.17  
7.17  
7.15  
7.15  
5.59  
5.58  
4.52  
4.52  
4.51  
4.50  
3.70  
3.67  
3.33  
3.31  
3.30  
3.29  
3.28  
3.20  
3.18  
3.17  
3.15  
1.35  
1.24

Parameter Value

Data File Name / Volumes/ nmrdata/ mkieffer/ vnmrsys/ data/ MEK-N-PH-TBAF/ PROTON01.fid/ fid

Title PROTON01

Origin Varian

Solvent cd3cn

Temperature 25.0

Pulse Sequence s2pul

Number of Scans 16

Receiver Gain 26

Relaxation Delay 5.0000

Pulse Width 4.9500

Acquisition Time 3.0000

Acquisition Date 2014-08-15T14:39:36

Spectrometer Frequency 499.69

Spectral Width 8000.0

Lowest Frequency -1019.3

Nucleus 1H

Acquired Size 24000

Spectral Size 65536

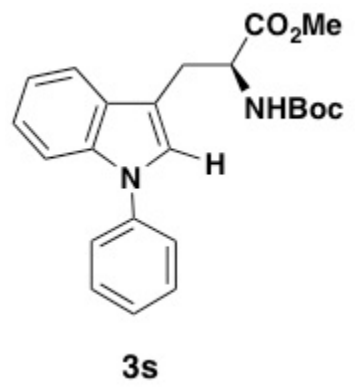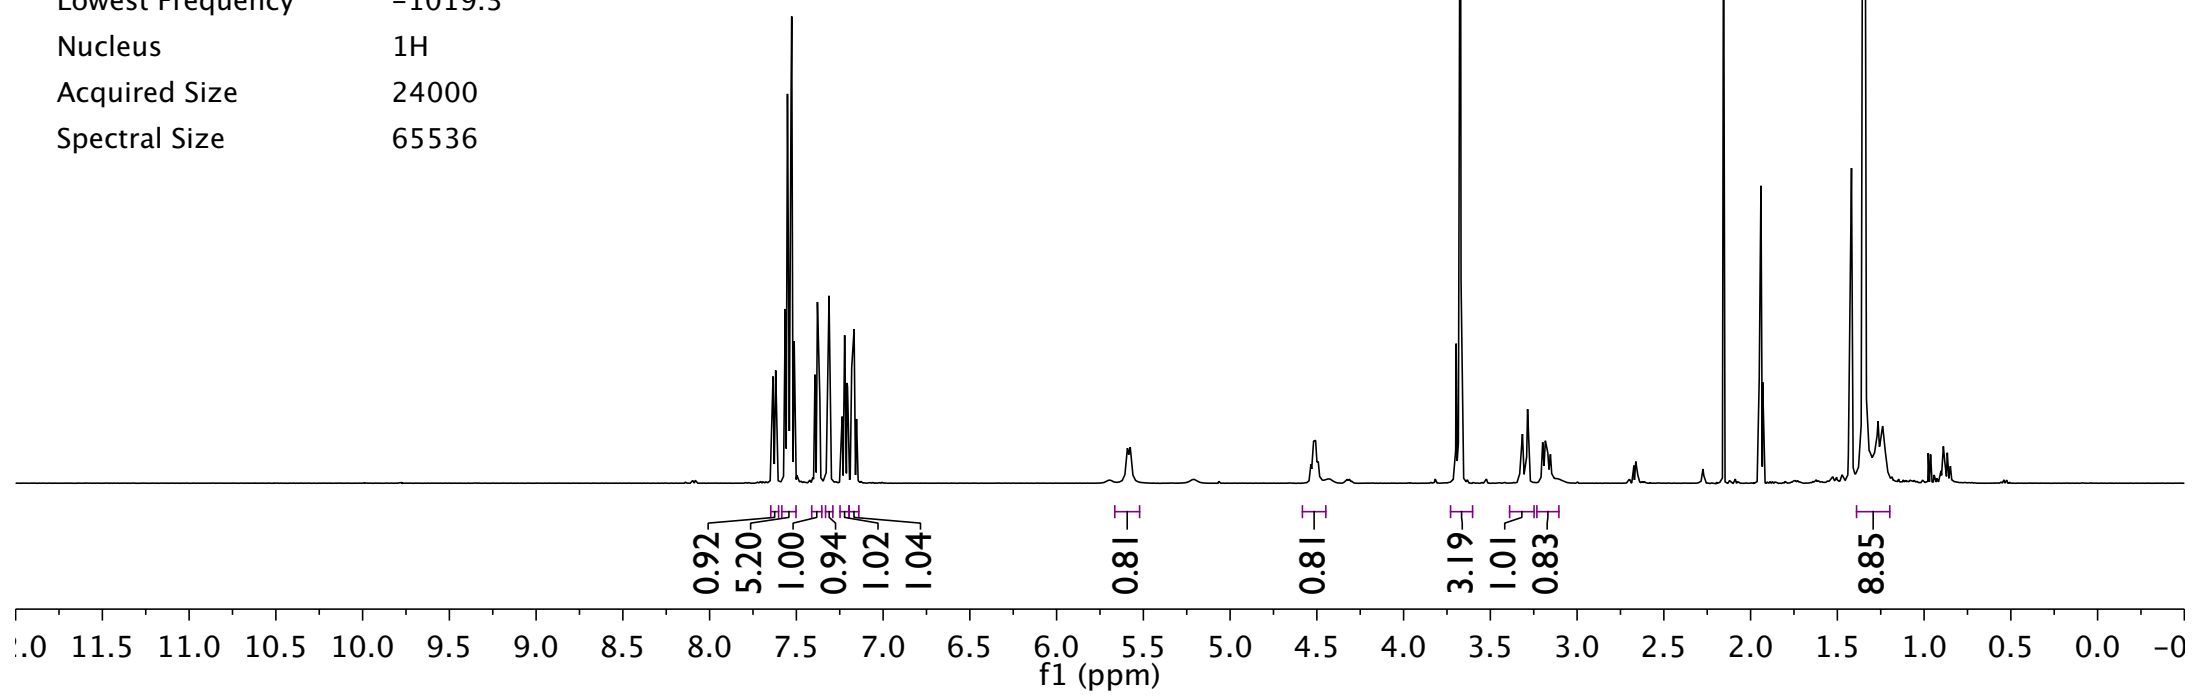

| Parameter              | Value                                                                         |
|------------------------|-------------------------------------------------------------------------------|
| Data File Name         | / Volumes/ nmrdata/ mkieffer/ vnmrsys/ data/ MEK-N-PH-TBAF/ CARBON01.fid/ fid |
| Title                  | CARBON01                                                                      |
| Origin                 | Varian                                                                        |
| Solvent                | cd3cn                                                                         |
| Temperature            | 25.0                                                                          |
| Pulse Sequence         | s2pul                                                                         |
| Number of Scans        | 1000                                                                          |
| Receiver Gain          | 30                                                                            |
| Relaxation Delay       | 1.0000                                                                        |
| Pulse Width            | 4.2500                                                                        |
| Acquisition Time       | 1.0420                                                                        |
| Acquisition Date       | 2014-08-15T14:42:00                                                           |
| Spectrometer Frequency | 125.66                                                                        |
| Spectral Width         | 31446.5                                                                       |
| Lowest Frequency       | -1785.3                                                                       |
| Nucleus                | <sup>13</sup> C                                                               |
| Acquired Size          | 32768                                                                         |
| Spectral Size          | 65536                                                                         |

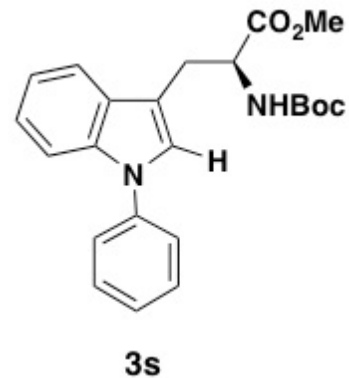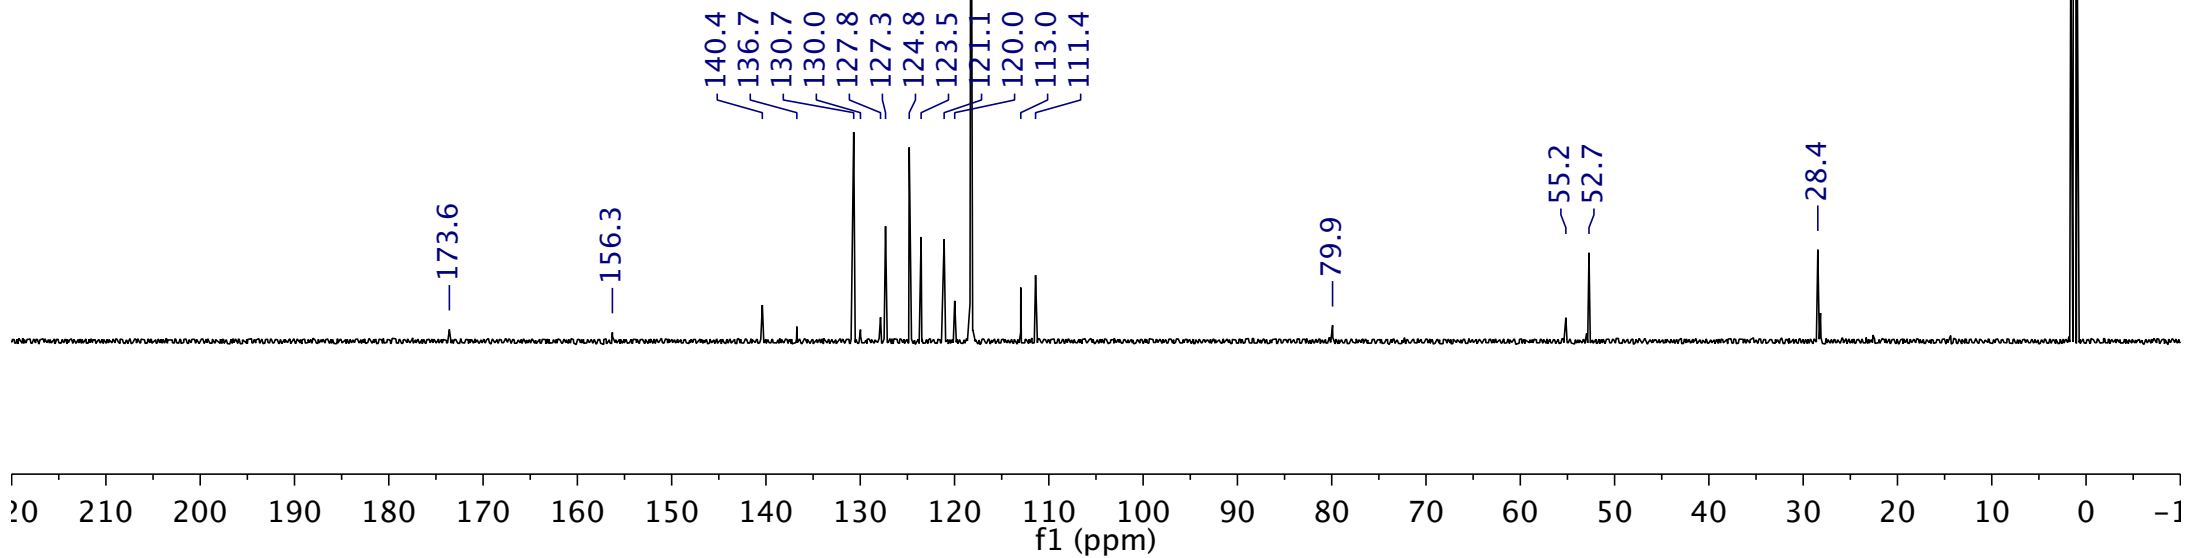

| Parameter              | Value                                                                       |
|------------------------|-----------------------------------------------------------------------------|
| Data File Name         | / Volumes/ data/ indy/ mKieffer/ vnmsys/ data/ MEK6140-B/ PROTON02.fid/ fid |
| Title                  | PROTON02                                                                    |
| Origin                 | Varian                                                                      |
| Solvent                | cd3cn                                                                       |
| Temperature            | 25.0                                                                        |
| Pulse Sequence         | s2pul                                                                       |
| Number of Scans        | 8                                                                           |
| Receiver Gain          | 16                                                                          |
| Relaxation Delay       | 1.0000                                                                      |
| Pulse Width            | 4.9500                                                                      |
| Acquisition Time       | 3.0000                                                                      |
| Acquisition Date       | 2014-01-12T19:04:14                                                         |
| Spectrometer Frequency | 499.70                                                                      |
| Spectral Width         | 8000.0                                                                      |
| Lowest Frequency       | -1016.3                                                                     |
| Nucleus                | <sup>1</sup> H                                                              |
| Acquired Size          | 24000                                                                       |
| Spectral Size          | 65536                                                                       |

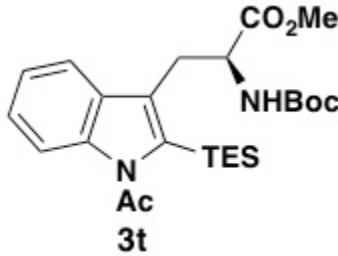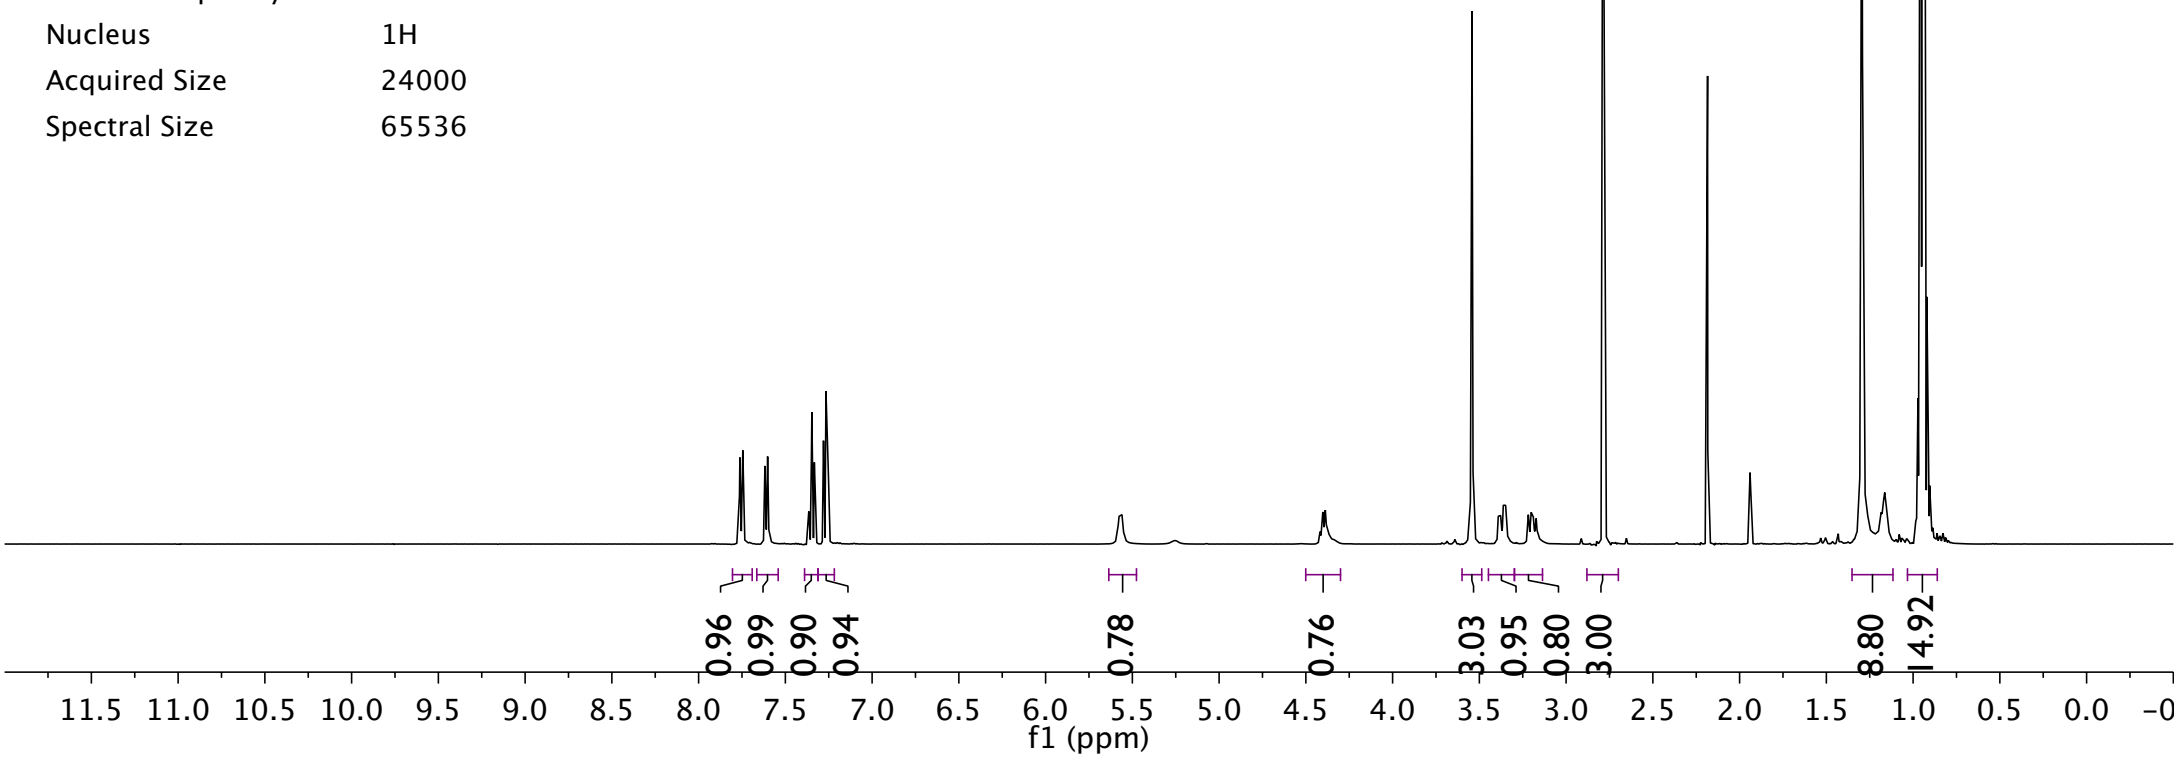

| Parameter              | Value                                                                        |
|------------------------|------------------------------------------------------------------------------|
| Data File Name         | / Volumes/ data/ indy/ mkieffer/ vnmrsys/ data/ MEK6140-B/ CARBON01.fid/ fid |
| Title                  | CARBON01                                                                     |
| Origin                 | Varian                                                                       |
| Solvent                | cd3cn                                                                        |
| Temperature            | 25.0                                                                         |
| Pulse Sequence         | s2pul                                                                        |
| Number of Scans        | 512                                                                          |
| Receiver Gain          | 30                                                                           |
| Relaxation Delay       | 1.0000                                                                       |
| Pulse Width            | 4.2500                                                                       |
| Acquisition Time       | 1.0420                                                                       |
| Acquisition Date       | 2014-01-12T19:05:10                                                          |
| Spectrometer Frequency | 125.66                                                                       |
| Spectral Width         | 31446.5                                                                      |
| Lowest Frequency       | -1781.9                                                                      |
| Nucleus                | <sup>13</sup> C                                                              |
| Acquired Size          | 32768                                                                        |
| Spectral Size          | 65536                                                                        |

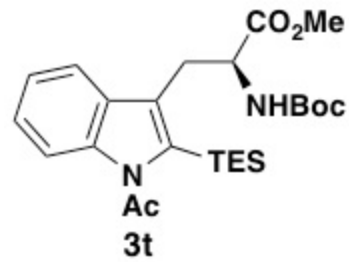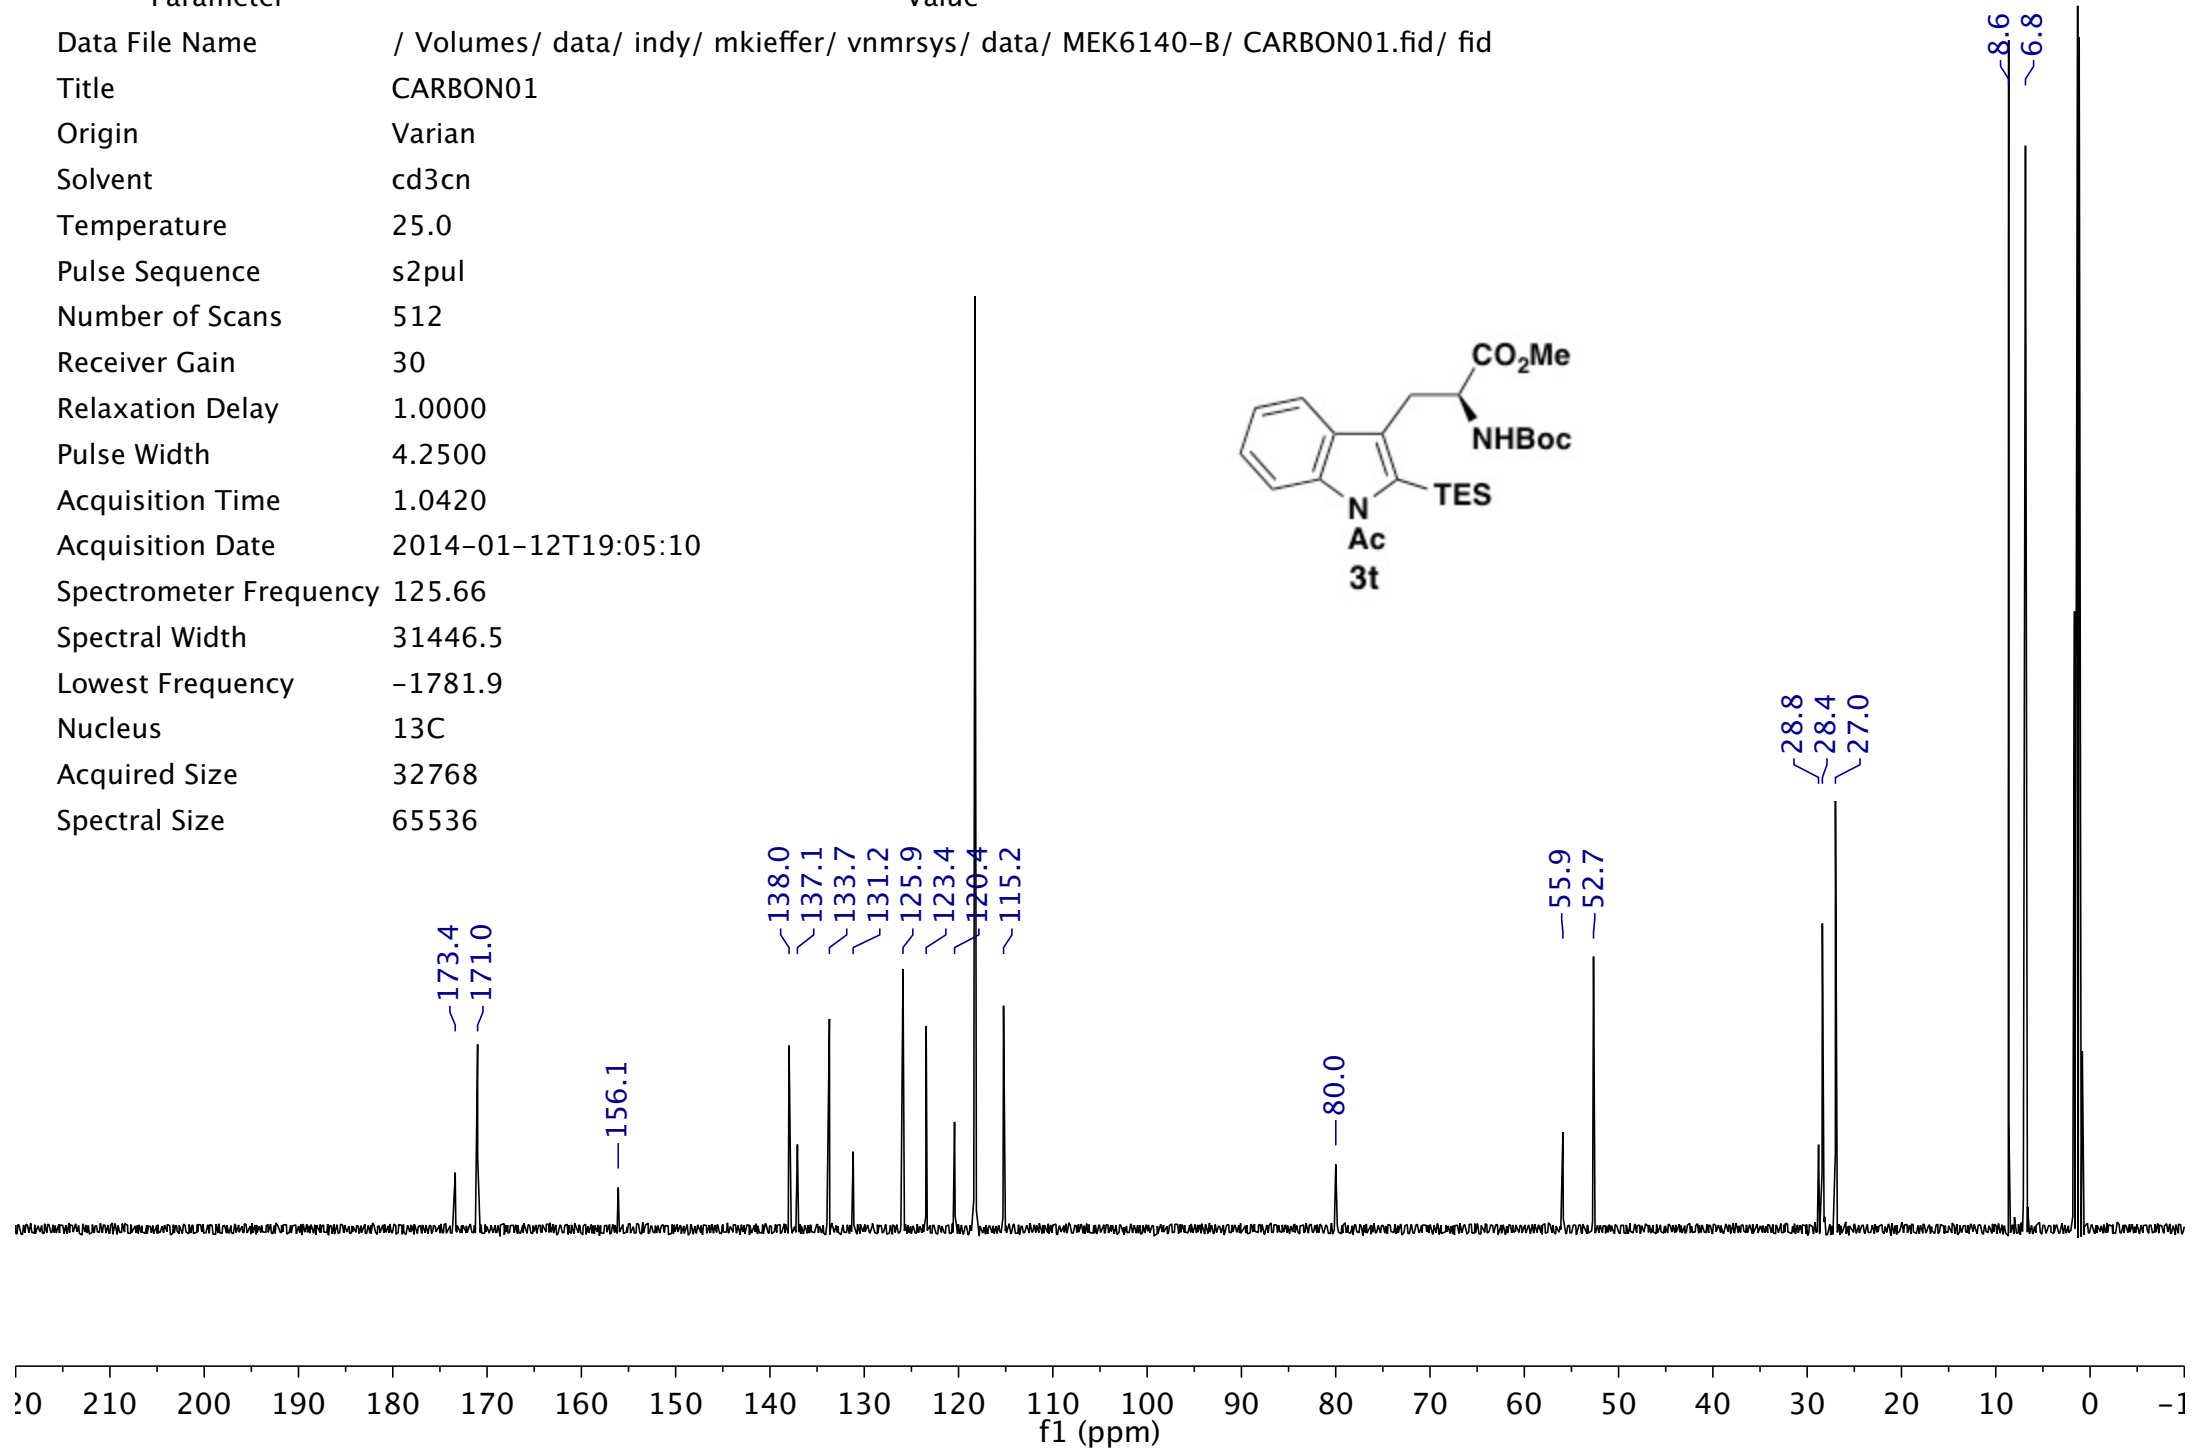



7.61 7.61 7.60 7.59 7.59 7.58 7.50 7.48 7.48 7.34 7.34 7.33 7.32 7.32 7.31 7.31 7.29 7.29 7.27 7.27 7.26 7.26 5.63 5.62 4.50 4.49 4.49 4.47 4.47 4.46 3.67 3.22 3.21 3.20 3.18 3.09 3.07 3.06 3.04 1.53 1.50 1.48 1.44 1.41 1.40 1.39 1.35 1.32 1.31 1.31 1.28 1.27 1.25 1.25 1.22

Parameter Value

Data File Name / Volumes/ data/ indy/ mkieffer/ vnmsys/ data/ MEK-Phenol-TBAF/ PROTON01.fid/ fid

Title PROTON01

Origin Varian

Solvent cd3cn

Temperature 25.0

Pulse Sequence s2pul

Number of Scans 16

Receiver Gain 30

Relaxation Delay 5.0000

Pulse Width 4.9500

Acquisition Time 3.0000

Acquisition Date 2014-08-15T13:58:50

Spectrometer Frequency 499.69

Spectral Width 8000.0

Lowest Frequency -1019.8

Nucleus 1H

Acquired Size 24000

Spectral Size 65536

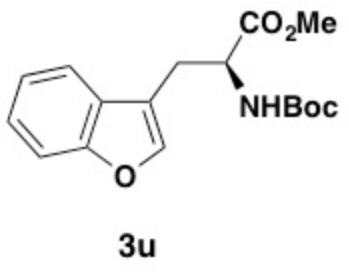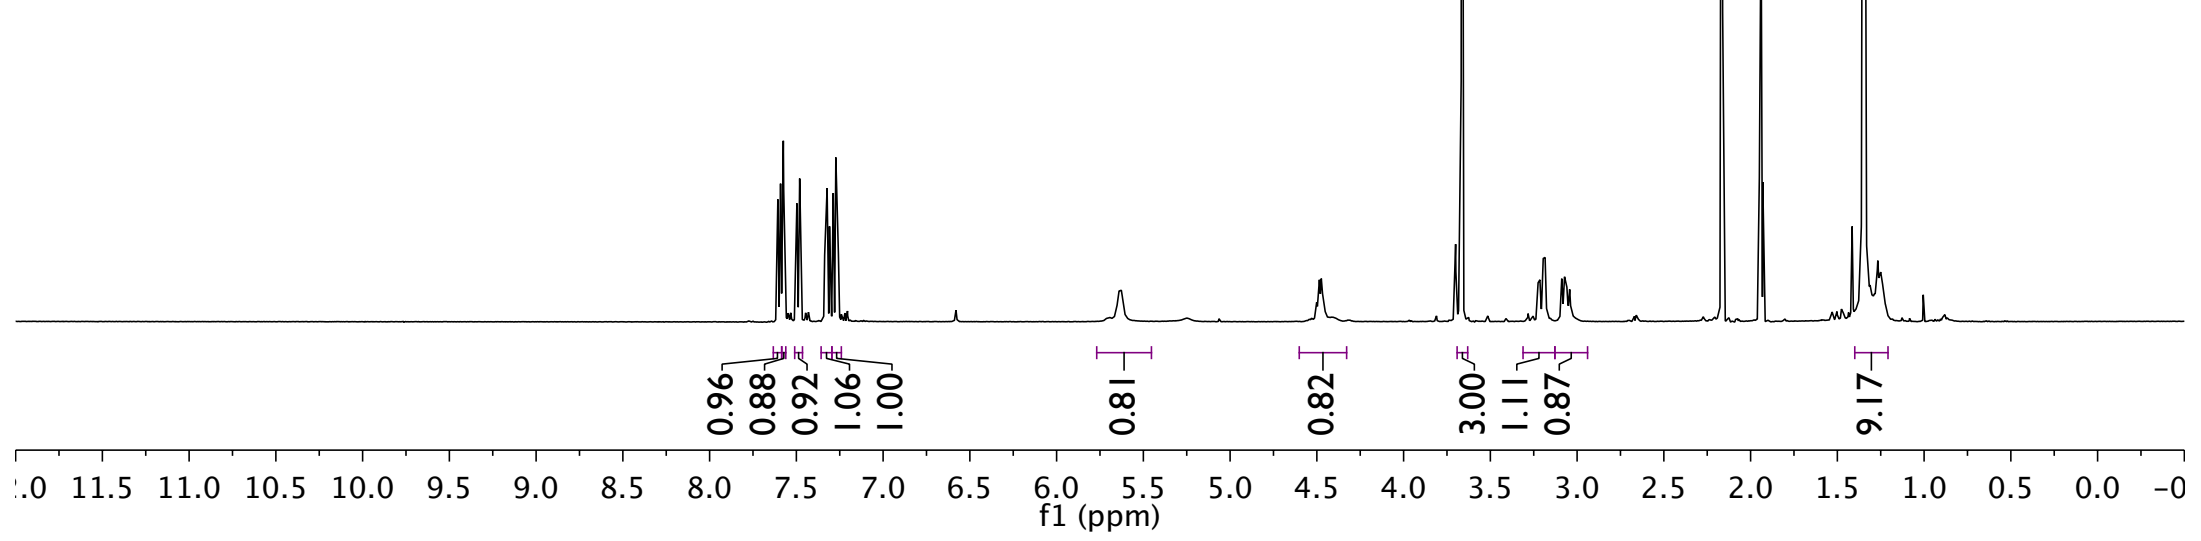

| Parameter              | Value                                                                             |
|------------------------|-----------------------------------------------------------------------------------|
| Data File Name         | / Volumes/ data/ indy/ mkieffer/ vnmsys/ data/ MEK-Phenol-TBAF/ CARBON01.fid/ fid |
| Title                  | CARBON01                                                                          |
| Origin                 | Varian                                                                            |
| Solvent                | cd3cn                                                                             |
| Temperature            | 25.0                                                                              |
| Pulse Sequence         | s2pul                                                                             |
| Number of Scans        | 1000                                                                              |
| Receiver Gain          | 30                                                                                |
| Relaxation Delay       | 1.0000                                                                            |
| Pulse Width            | 4.2500                                                                            |
| Acquisition Time       | 1.0420                                                                            |
| Acquisition Date       | 2014-08-15T14:01:14                                                               |
| Spectrometer Frequency | 125.66                                                                            |
| Spectral Width         | 31446.5                                                                           |
| Lowest Frequency       | -1786.0                                                                           |
| Nucleus                | <sup>13</sup> C                                                                   |
| Acquired Size          | 32768                                                                             |
| Spectral Size          | 65536                                                                             |

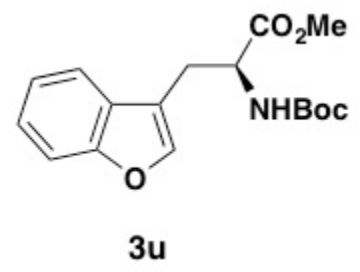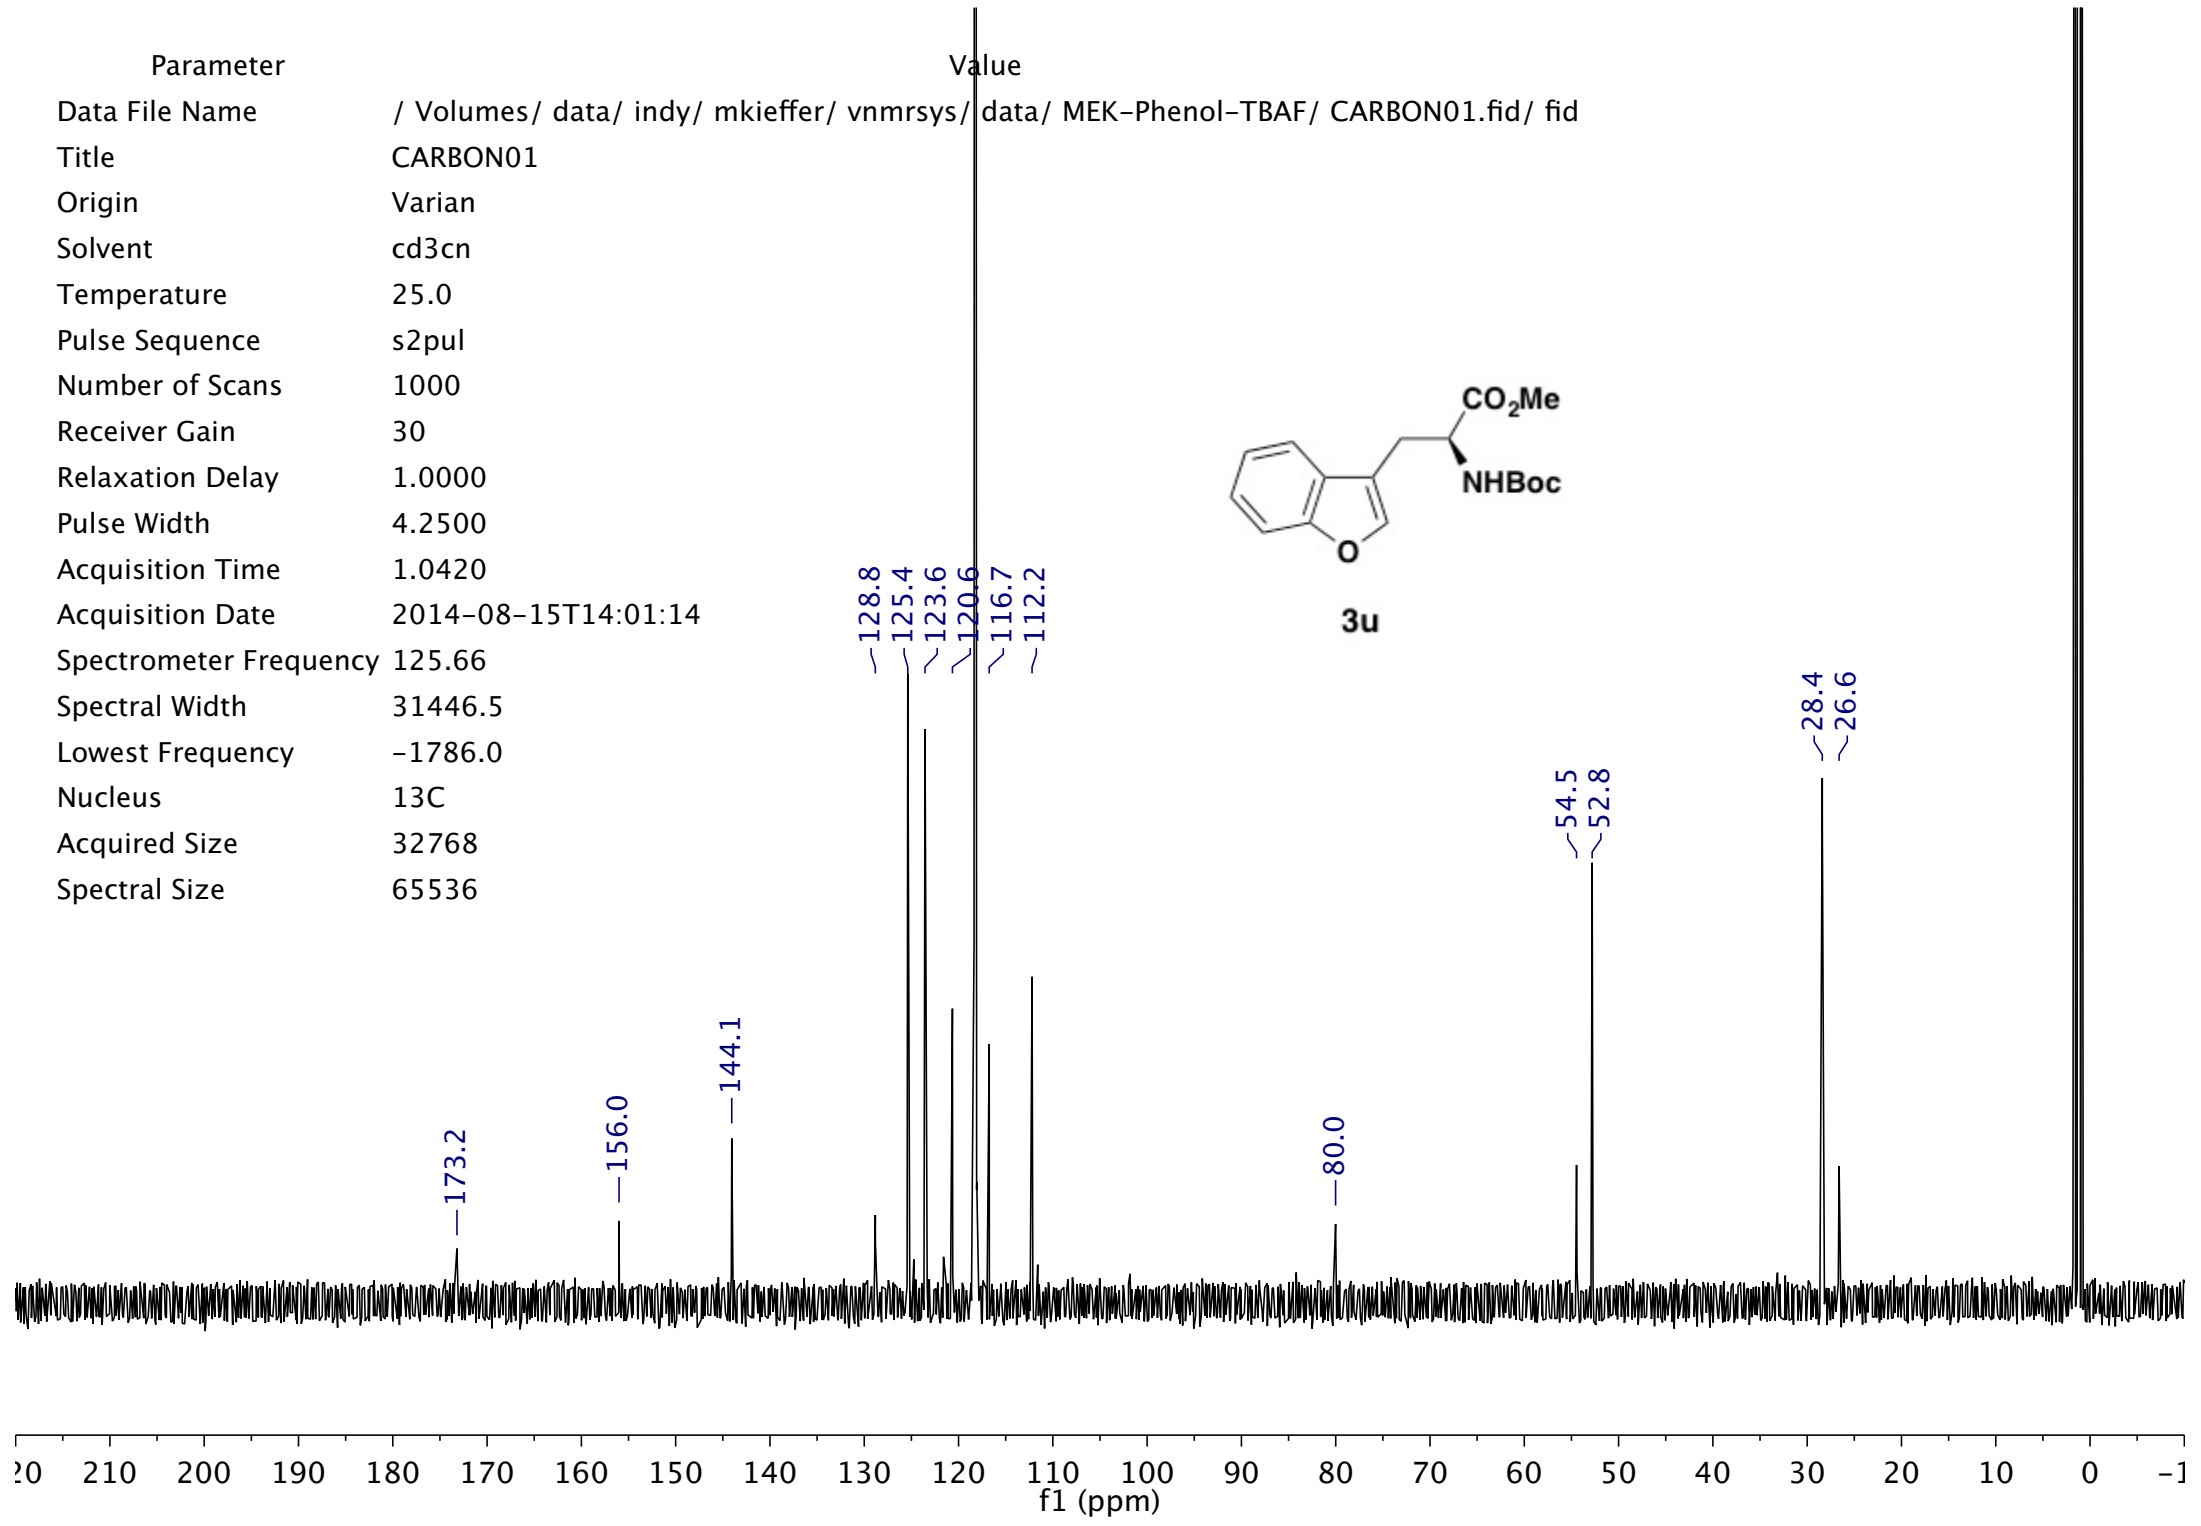

9.12  
7.60  
7.60  
7.58  
7.58  
7.40  
7.40  
7.40  
7.39  
7.39  
7.38  
7.22  
7.21  
7.11  
7.10  
7.10  
7.09  
7.09  
7.06  
7.06  
7.05  
7.05  
7.04  
7.04  
7.04  
7.03  
7.03  
7.03  
3.48  
3.24  
3.22  
3.12  
3.11  
1.33  
1.31  
1.31  
1.31  
1.01  
1.00  
1.00  
0.99  
0.99  
0.99  
0.99  
0.98  
0.98  
0.98  
0.98  
0.98  
0.97  
0.97  
0.96  
0.96  
0.95  
0.95  
0.94  
0.94  
0.93  
0.93  
0.92  
0.92  
0.91  
0.91  
0.90

Parameter

Value

Data File Name / Volumes/ data/ indy/ mkieffer/ vnmsys/ data/ MEK6062-C-MeCN/ PROTON01.fid/ fid  
 Title PROTON01  
 Origin Varian  
 Solvent cd3cn  
 Temperature 25.0  
 Pulse Sequence s2pul  
 Number of Scans 32  
 Receiver Gain 18  
 Relaxation Delay 5.0000  
 Pulse Width 4.9500  
 Acquisition Time 3.0000  
 Acquisition Date 2013-10-13T20:57:06  
 Spectrometer Frequency 499.70  
 Spectral Width 8000.0  
 Lowest Frequency -1016.3  
 Nucleus 1H  
 Acquired Size 24000  
 Spectral Size 65536

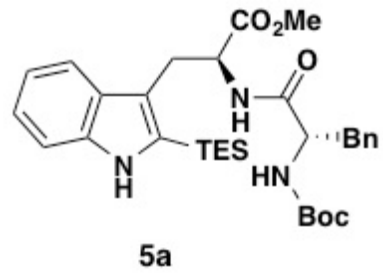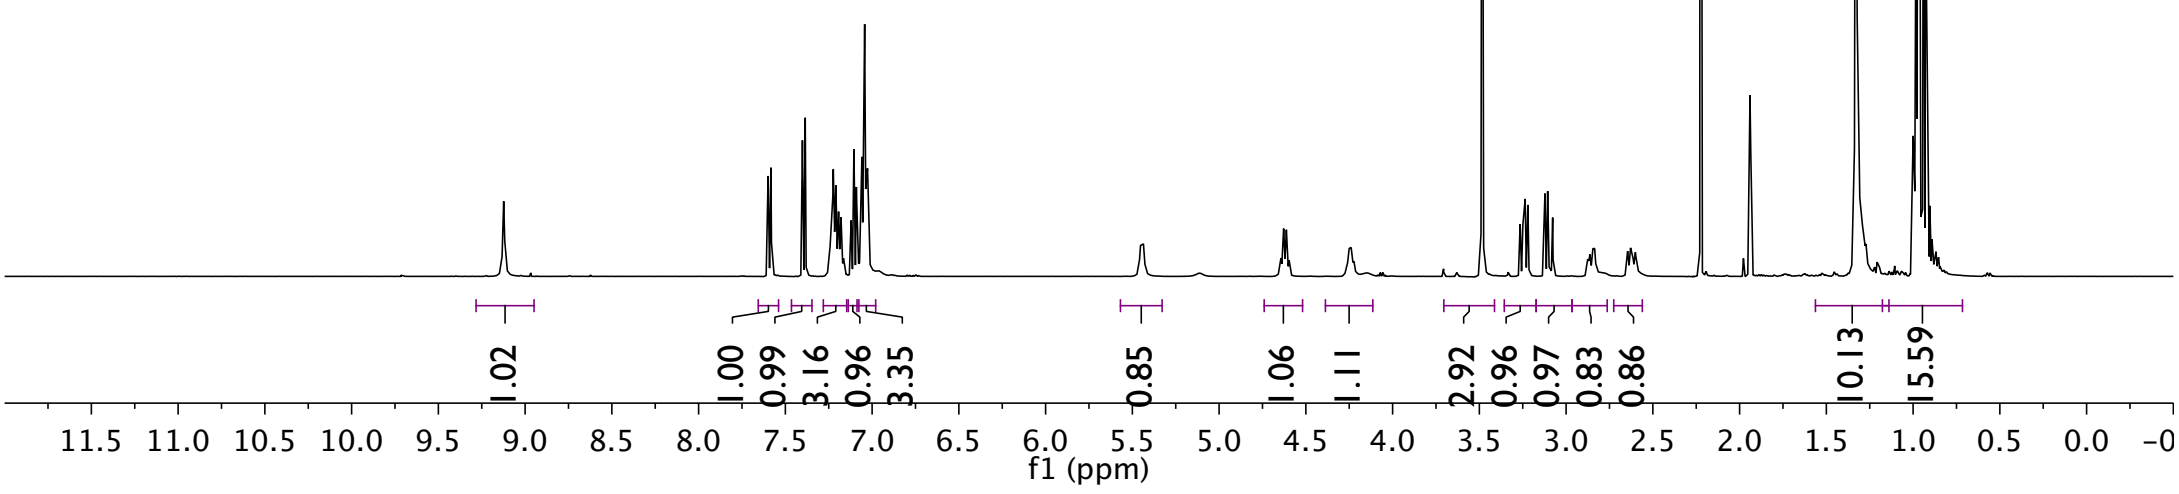

| Parameter              | Value                                                                             |
|------------------------|-----------------------------------------------------------------------------------|
| Data File Name         | / Volumes/ data/ indy/ mkieffer/ vnmrsys/ data/ MEK6062-C-MeCN/ CARBON01.fid/ fid |
| Title                  | CARBON01                                                                          |
| Origin                 | Varian                                                                            |
| Solvent                | cd3cn                                                                             |
| Temperature            | 25.0                                                                              |
| Pulse Sequence         | s2pul                                                                             |
| Number of Scans        | 256                                                                               |
| Receiver Gain          | 30                                                                                |
| Relaxation Delay       | 1.0000                                                                            |
| Pulse Width            | 4.2500                                                                            |
| Acquisition Time       | 1.0420                                                                            |
| Acquisition Date       | 2013-10-13T21:01:45                                                               |
| Spectrometer Frequency | 125.66                                                                            |
| Spectral Width         | 31446.5                                                                           |
| Lowest Frequency       | -1790.4                                                                           |
| Nucleus                | <sup>13</sup> C                                                                   |
| Acquired Size          | 32768                                                                             |
| Spectral Size          | 65536                                                                             |

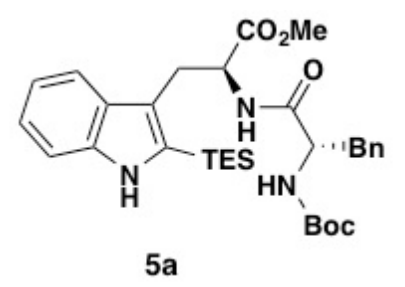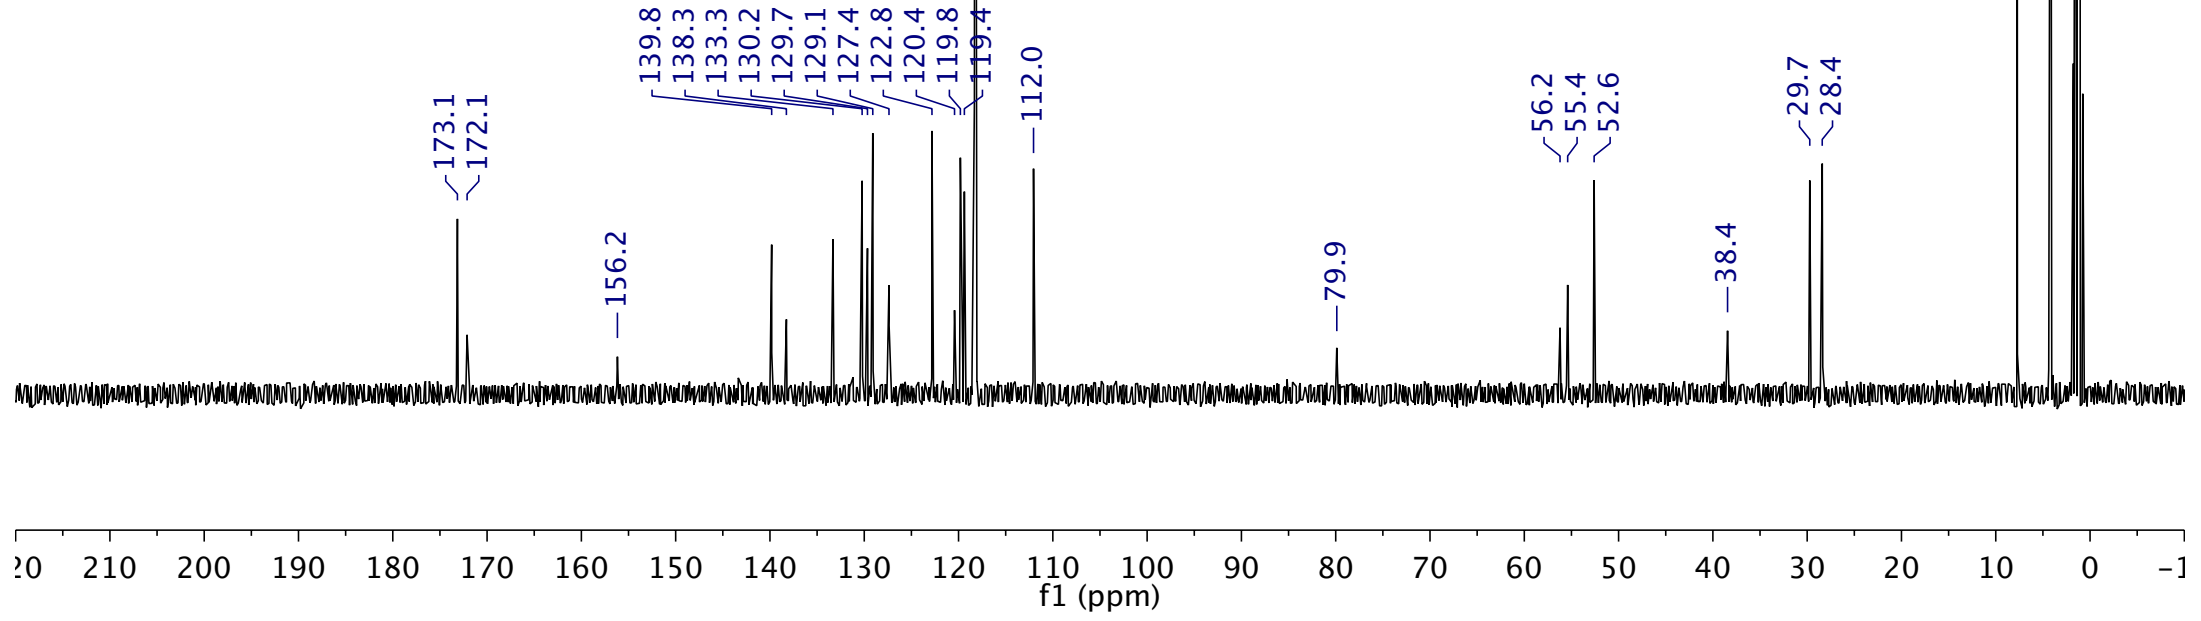

8.15  
7.40  
7.39  
7.38  
7.38  
7.38  
7.35  
7.35  
7.34  
7.34  
7.33  
7.33  
7.32  
7.31  
7.31  
7.30  
7.29  
7.29  
7.28  
7.23  
7.22  
7.19  
7.19  
7.19  
7.18  
7.17  
7.12  
7.12  
7.10  
7.10  
7.10  
6.94  
6.94  
5.64  
5.63  
3.60  
3.58  
3.57  
3.14  
3.13  
2.90  
2.88  
2.87  
1.00  
0.99  
0.99  
0.99  
0.98  
0.98  
0.97  
0.97  
0.96  
0.96  
0.95  
0.88  
0.88  
0.87  
0.87  
0.86  
0.86  
0.85  
0.85  
0.84  
0.83

Parameter

Value

Data File Name / Volumes/ data/ indy/ mkieffer/ vnmrsys/ data/ MEK6062-D/ PROTON01.fid/ fid  
 Title PROTON01  
 Origin Varian  
 Solvent cdcl3  
 Temperature 25.0  
 Pulse Sequence s2pul  
 Number of Scans 32  
 Receiver Gain 22  
 Relaxation Delay 5.0000  
 Pulse Width 4.9500  
 Acquisition Time 3.0000  
 Acquisition Date 2013-10-13T21:15:06  
 Spectrometer Frequency 499.70  
 Spectral Width 8000.0  
 Lowest Frequency -1004.3  
 Nucleus 1H  
 Acquired Size 24000  
 Spectral Size 65536

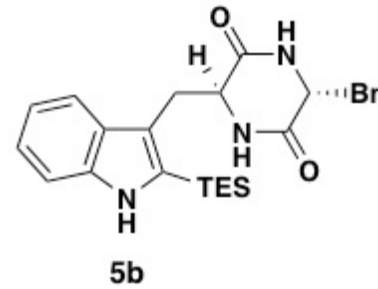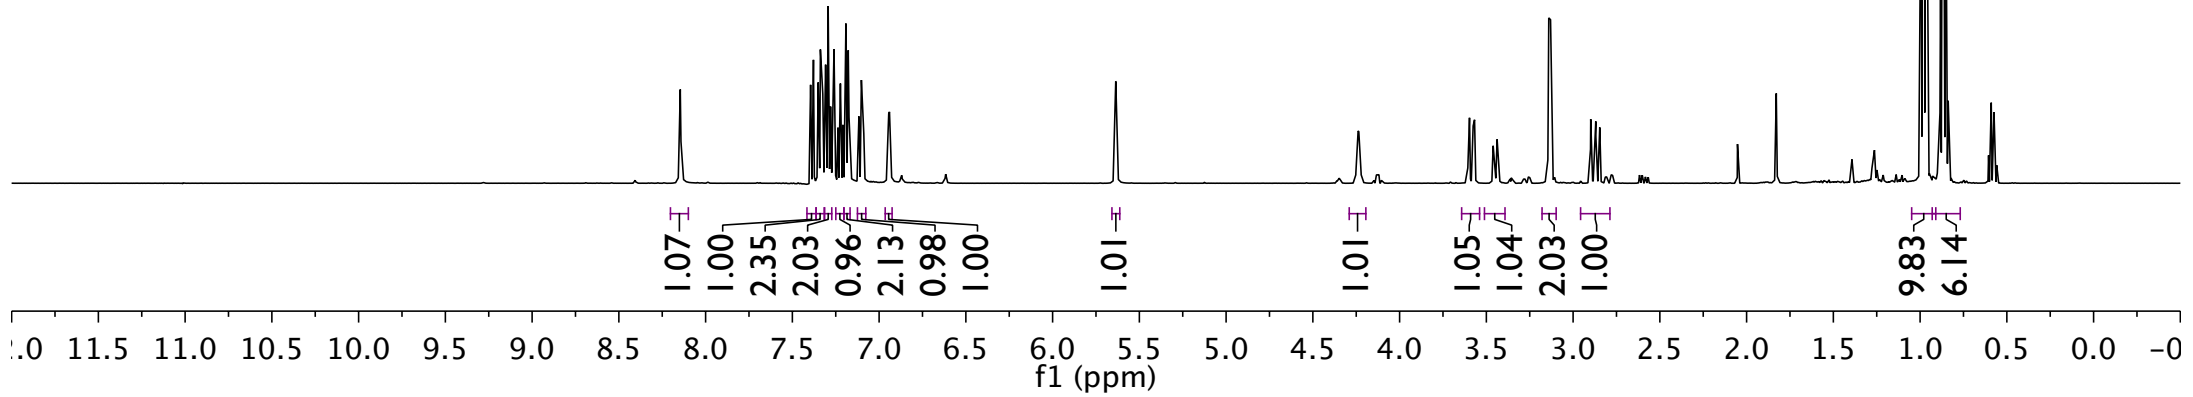

| Parameter              | Value                                                                        |
|------------------------|------------------------------------------------------------------------------|
| Data File Name         | / Volumes/ data/ indy/ mkieffer/ vnmrsys/ data/ MEK6062-D/ CARBON01.fid/ fid |
| Title                  | CARBON01                                                                     |
| Origin                 | Varian                                                                       |
| Solvent                | cdcl3                                                                        |
| Temperature            | 25.0                                                                         |
| Pulse Sequence         | s2pul                                                                        |
| Number of Scans        | 512                                                                          |
| Receiver Gain          | 30                                                                           |
| Relaxation Delay       | 1.0000                                                                       |
| Pulse Width            | 4.2500                                                                       |
| Acquisition Time       | 1.0420                                                                       |
| Acquisition Date       | 2013-10-13T21:19:37                                                          |
| Spectrometer Frequency | 125.66                                                                       |
| Spectral Width         | 31446.5                                                                      |
| Lowest Frequency       | -1889.7                                                                      |
| Nucleus                | <sup>13</sup> C                                                              |
| Acquired Size          | 32768                                                                        |
| Spectral Size          | 65536                                                                        |

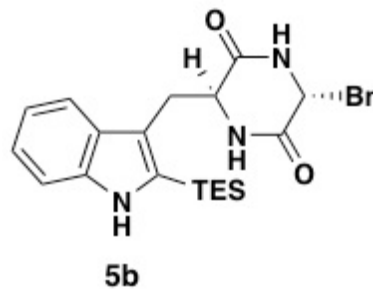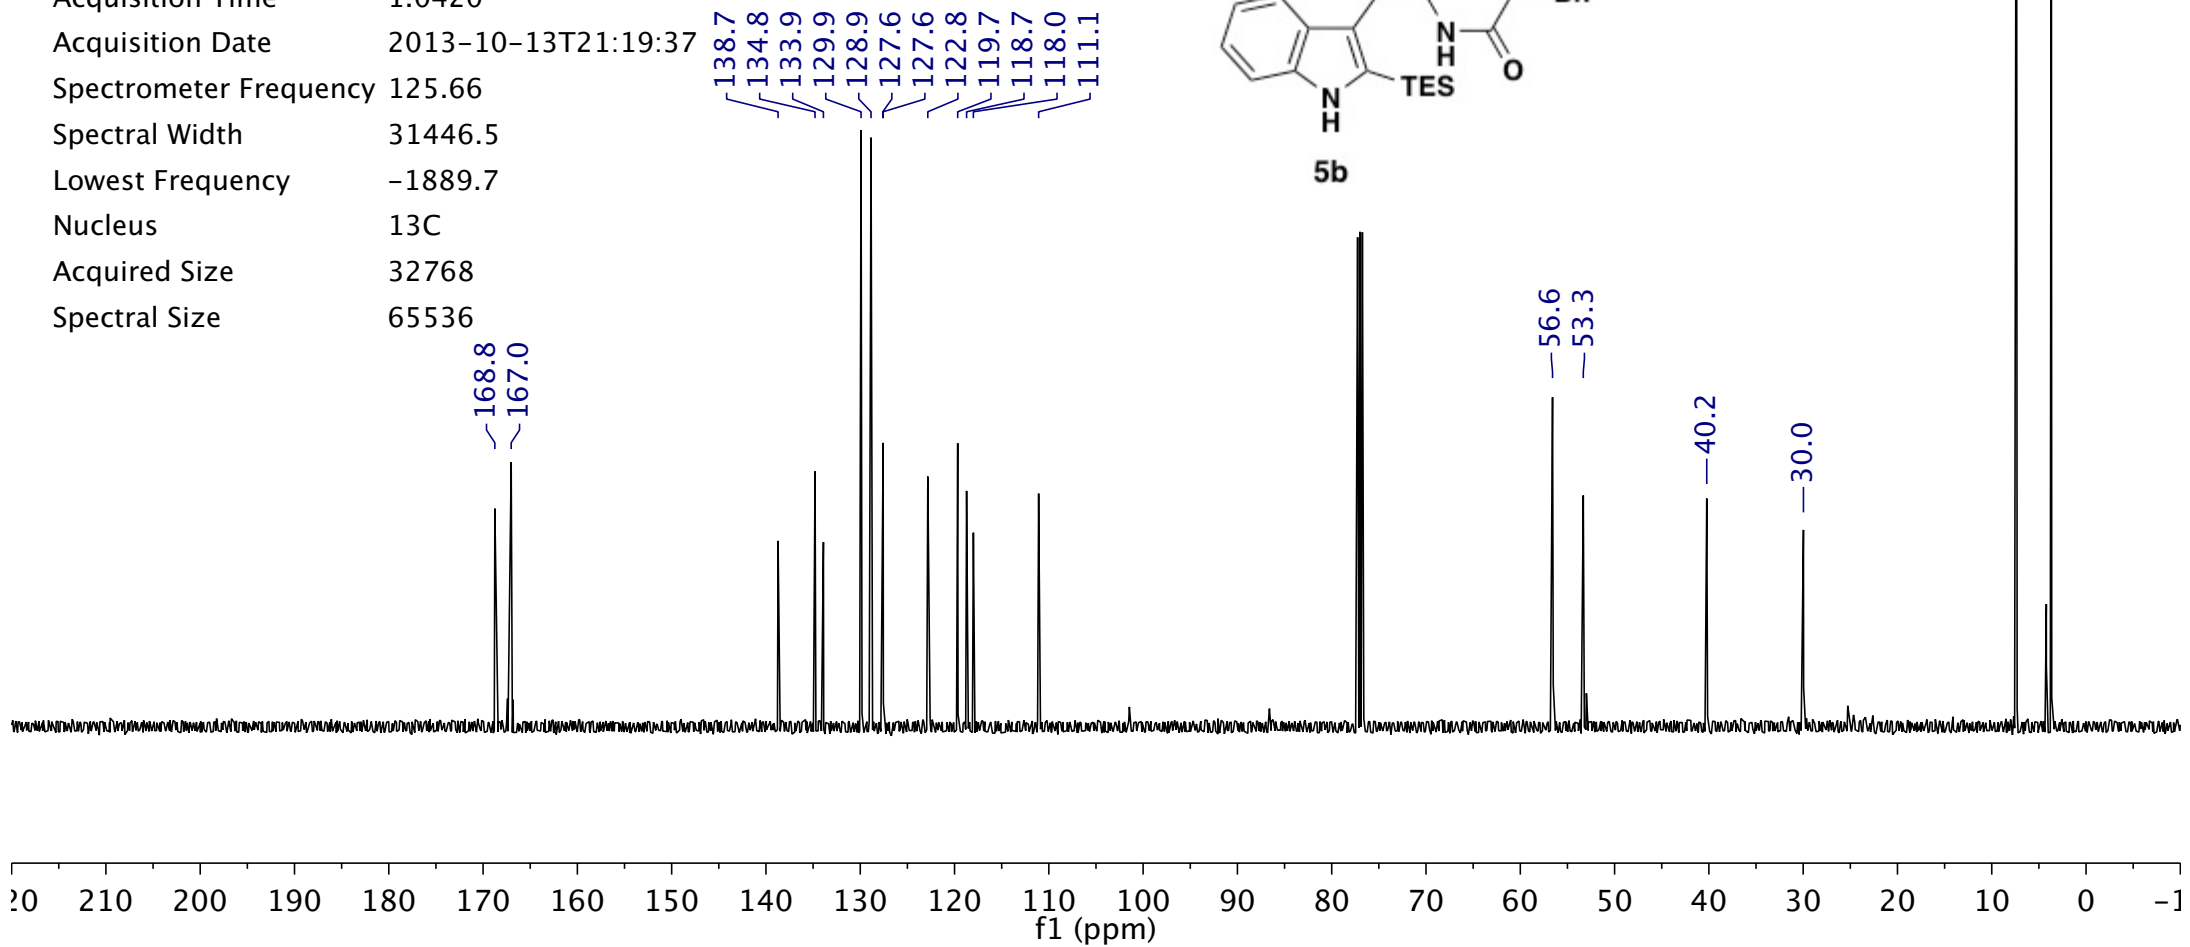

9.09  
7.59  
7.59  
7.59  
7.58  
7.57  
7.57  
7.41  
7.40  
7.40  
7.39  
7.39  
7.39  
7.26  
7.24  
7.23  
7.23  
7.22  
7.21  
7.13  
7.13  
7.12  
7.11  
7.11  
7.10  
7.10  
7.09  
7.09  
7.04  
7.04  
7.03  
7.02  
7.02  
4.22  
3.59  
1.25  
0.99  
0.98  
0.98  
0.98  
0.98  
0.97  
0.97  
0.97  
0.96  
0.96  
0.96  
0.96  
0.95  
0.95  
0.95  
0.95  
0.94  
0.94  
0.93  
0.93  
0.93  
0.92  
0.92  
0.92  
0.91  
0.91  
0.90  
0.90  
0.89

Parameter

Value

Data File Name / Volumes/ data/ indy/ mkieffer/ vnmsys/ data/ MEK6062-A-MeCN/ PROTON01.fid/ fid  
 Title PROTON01  
 Origin Varian  
 Solvent cd3cn  
 Temperature 25.0  
 Pulse Sequence s2pul  
 Number of Scans 32  
 Receiver Gain 22  
 Relaxation Delay 5.0000  
 Pulse Width 4.9500  
 Acquisition Time 3.0000  
 Acquisition Date 2013-10-13T20:28:41  
 Spectrometer Frequency 499.70  
 Spectral Width 8000.0  
 Lowest Frequency -1016.3  
 Nucleus 1H  
 Acquired Size 24000  
 Spectral Size 65536

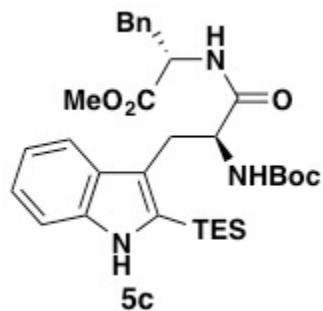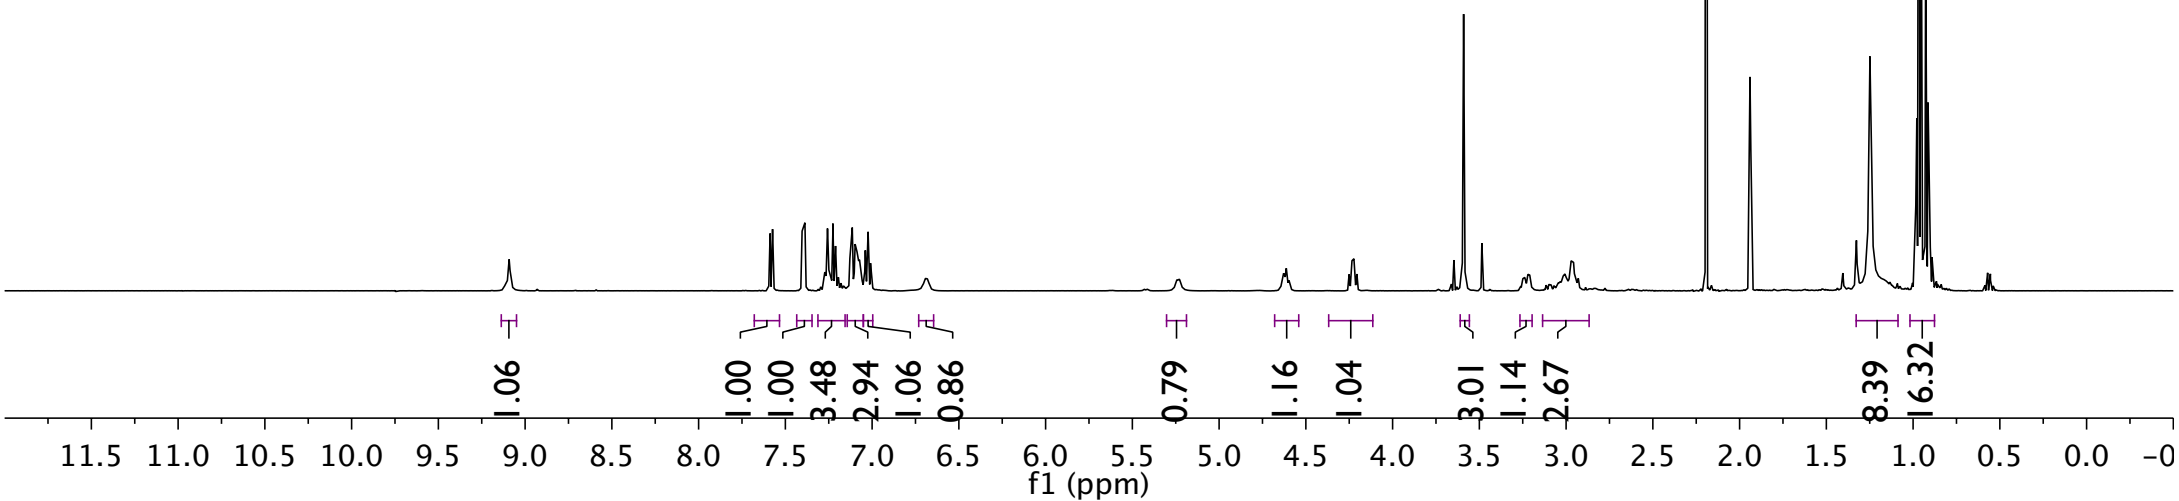

| Parameter              | Value                                                                            |
|------------------------|----------------------------------------------------------------------------------|
| Data File Name         | / Volumes/ data/ indy/ mkieffer/ vnmsys/ data/ MEK6062-A-MeCN/ CARBON01.fid/ fid |
| Title                  | CARBON01                                                                         |
| Origin                 | Varian                                                                           |
| Solvent                | cd3cn                                                                            |
| Temperature            | 25.0                                                                             |
| Pulse Sequence         | s2pul                                                                            |
| Number of Scans        | 512                                                                              |
| Receiver Gain          | 30                                                                               |
| Relaxation Delay       | 1.0000                                                                           |
| Pulse Width            | 4.2500                                                                           |
| Acquisition Time       | 1.0420                                                                           |
| Acquisition Date       | 2013-10-13T20:33:19                                                              |
| Spectrometer Frequency | 125.66                                                                           |
| Spectral Width         | 31446.5                                                                          |
| Lowest Frequency       | -1789.6                                                                          |
| Nucleus                | <sup>13</sup> C                                                                  |
| Acquired Size          | 32768                                                                            |
| Spectral Size          | 65536                                                                            |

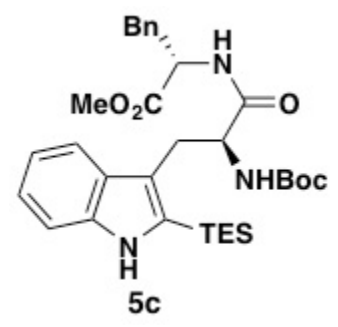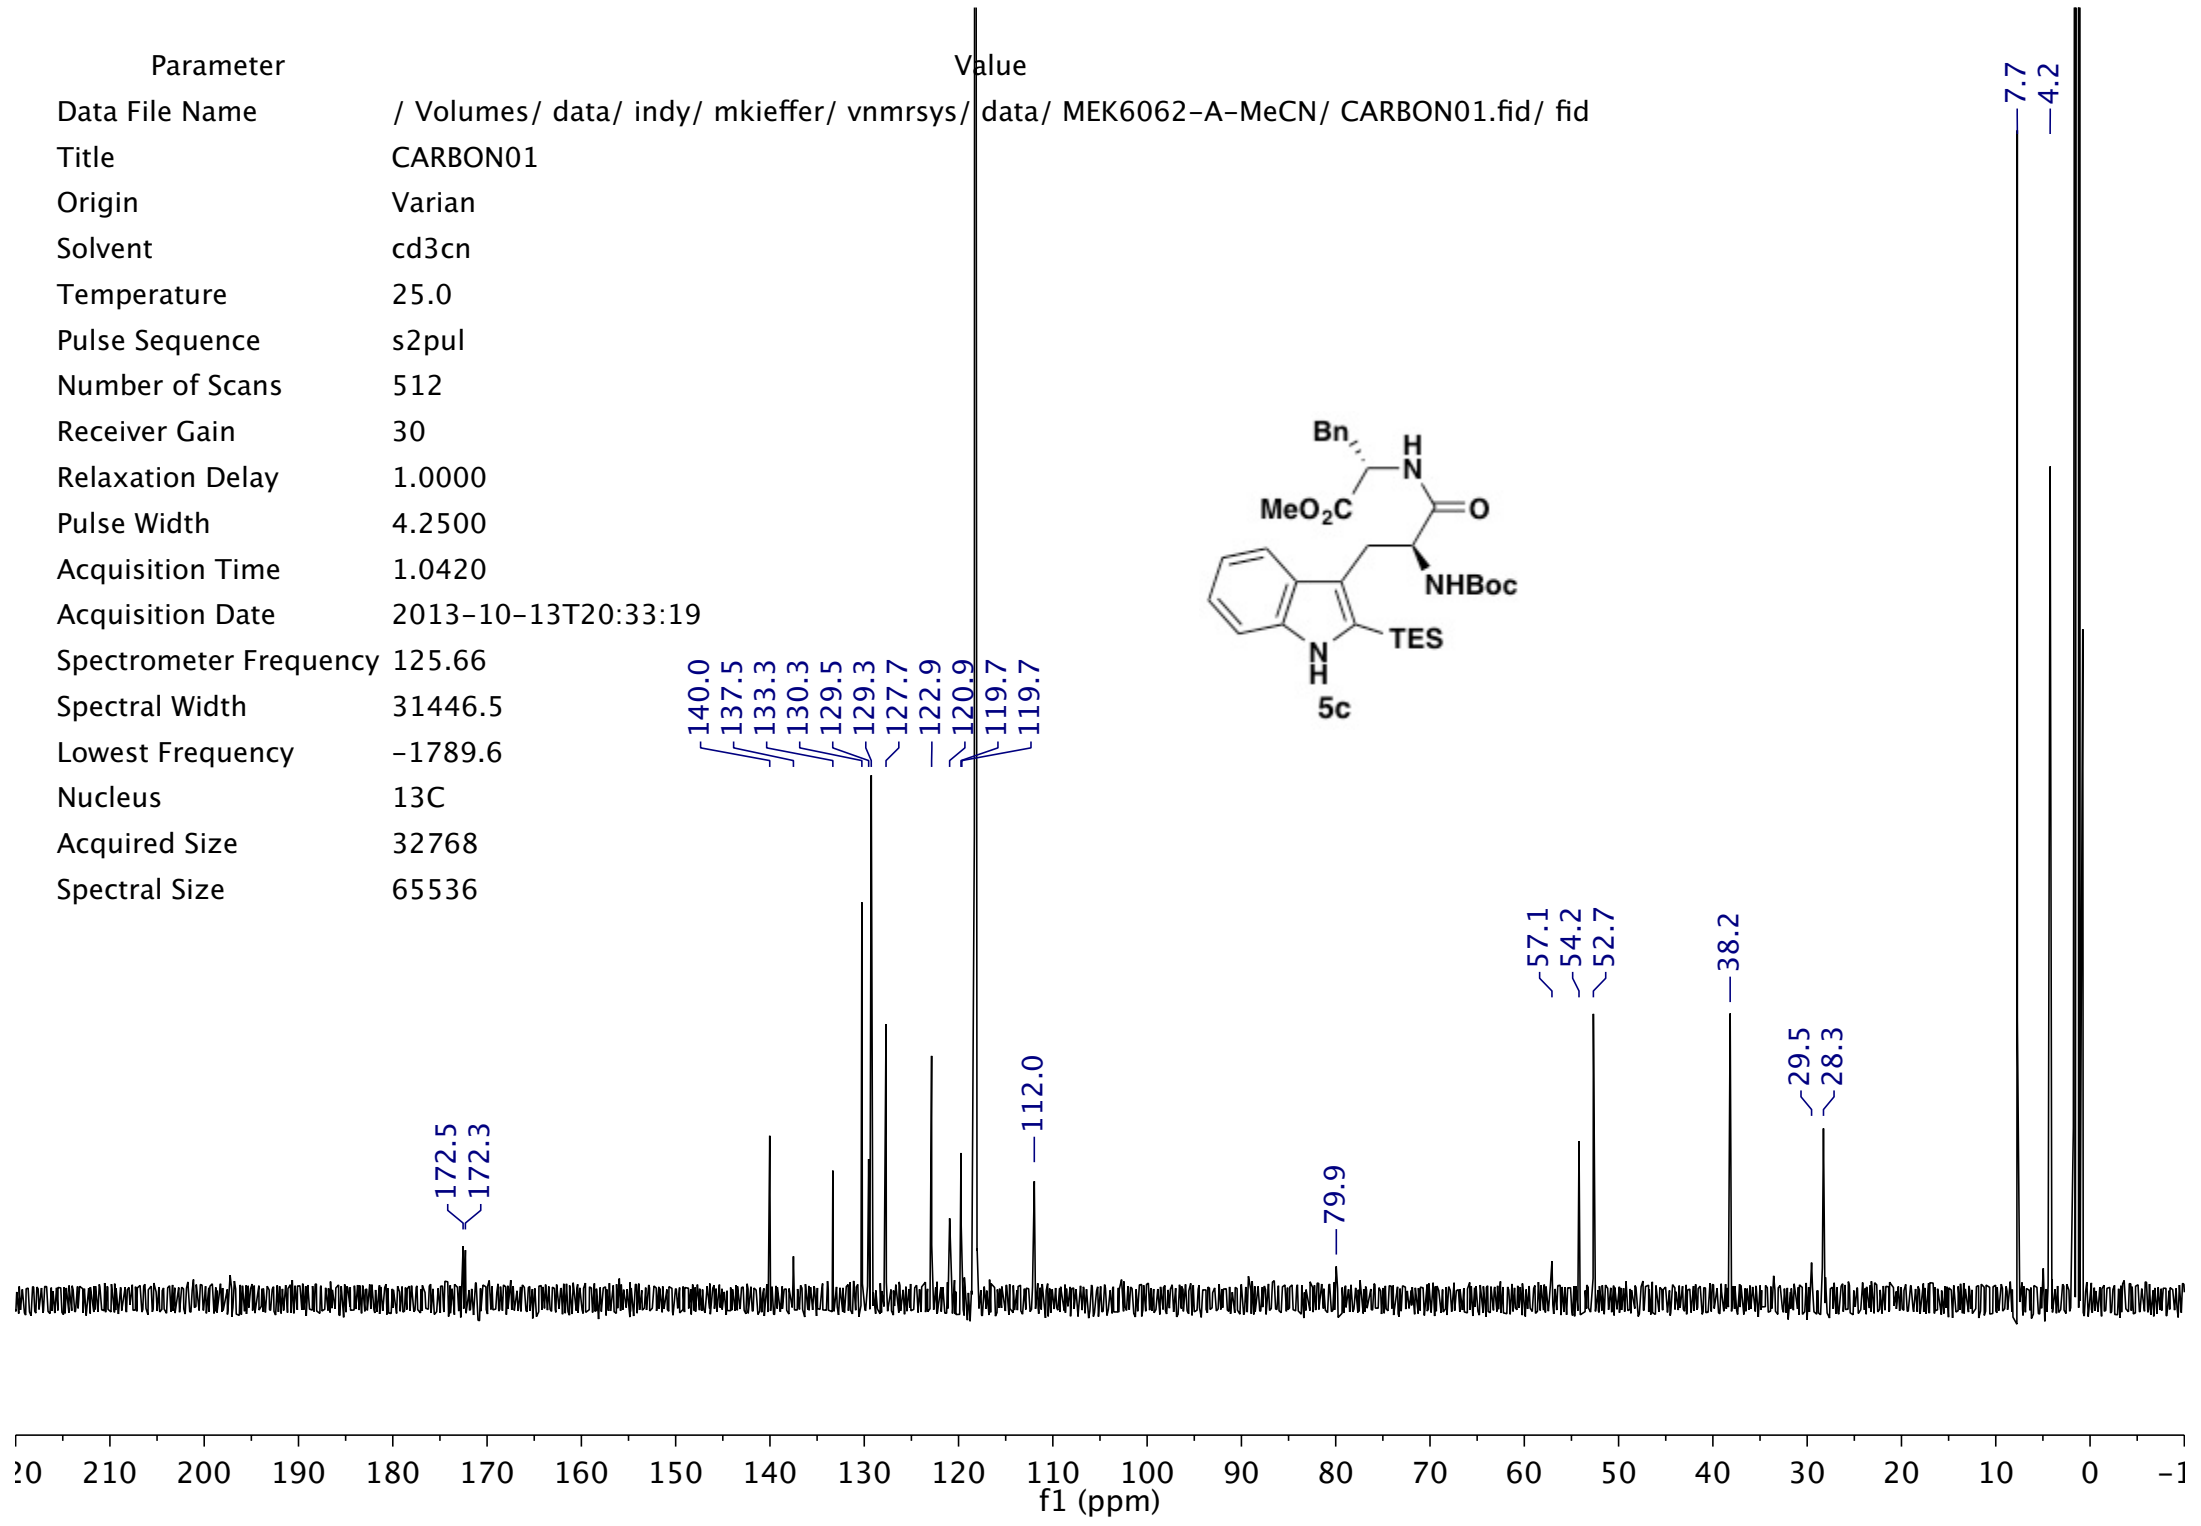



8.12  
7.57  
7.57  
7.56  
7.55  
7.41  
7.41  
7.41  
7.39  
7.39  
7.39  
7.24  
7.23  
7.22  
7.22  
7.22  
7.21  
7.20  
7.13  
7.13  
7.12  
7.11  
7.11  
7.10  
7.10  
5.59  
4.07  
3.86  
3.85  
3.83  
3.82  
3.61  
3.03  
3.00  
3.00  
2.97  
2.09  
2.07  
2.07  
2.07  
2.07  
1.02  
1.02  
1.02  
1.01  
1.01  
1.01  
1.01  
1.00  
1.00  
1.00  
0.99  
0.99  
0.99  
0.98  
0.93  
0.93  
0.91  
0.91  
0.91  
0.90  
0.90  
0.89  
0.88  
0.88

| Parameter              | Value                                                                     |
|------------------------|---------------------------------------------------------------------------|
| Data File Name         | / Volumes/ nmrdata/ mkieffer/ vnmrsys/ data/ MEK6062-B/ PROTON02.fid/ fid |
| Title                  | PROTON02                                                                  |
| Origin                 | Varian                                                                    |
| Solvent                | cdcl3                                                                     |
| Temperature            | 25.0                                                                      |
| Pulse Sequence         | s2pul                                                                     |
| Number of Scans        | 32                                                                        |
| Receiver Gain          | 28                                                                        |
| Relaxation Delay       | 5.0000                                                                    |
| Pulse Width            | 4.9500                                                                    |
| Acquisition Time       | 3.0000                                                                    |
| Acquisition Date       | 2013-09-09T22:42:21                                                       |
| Spectrometer Frequency | 499.70                                                                    |
| Spectral Width         | 8000.0                                                                    |
| Lowest Frequency       | -1004.3                                                                   |
| Nucleus                | 1H                                                                        |
| Acquired Size          | 24000                                                                     |
| Spectral Size          | 65536                                                                     |

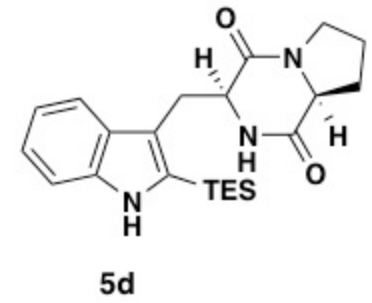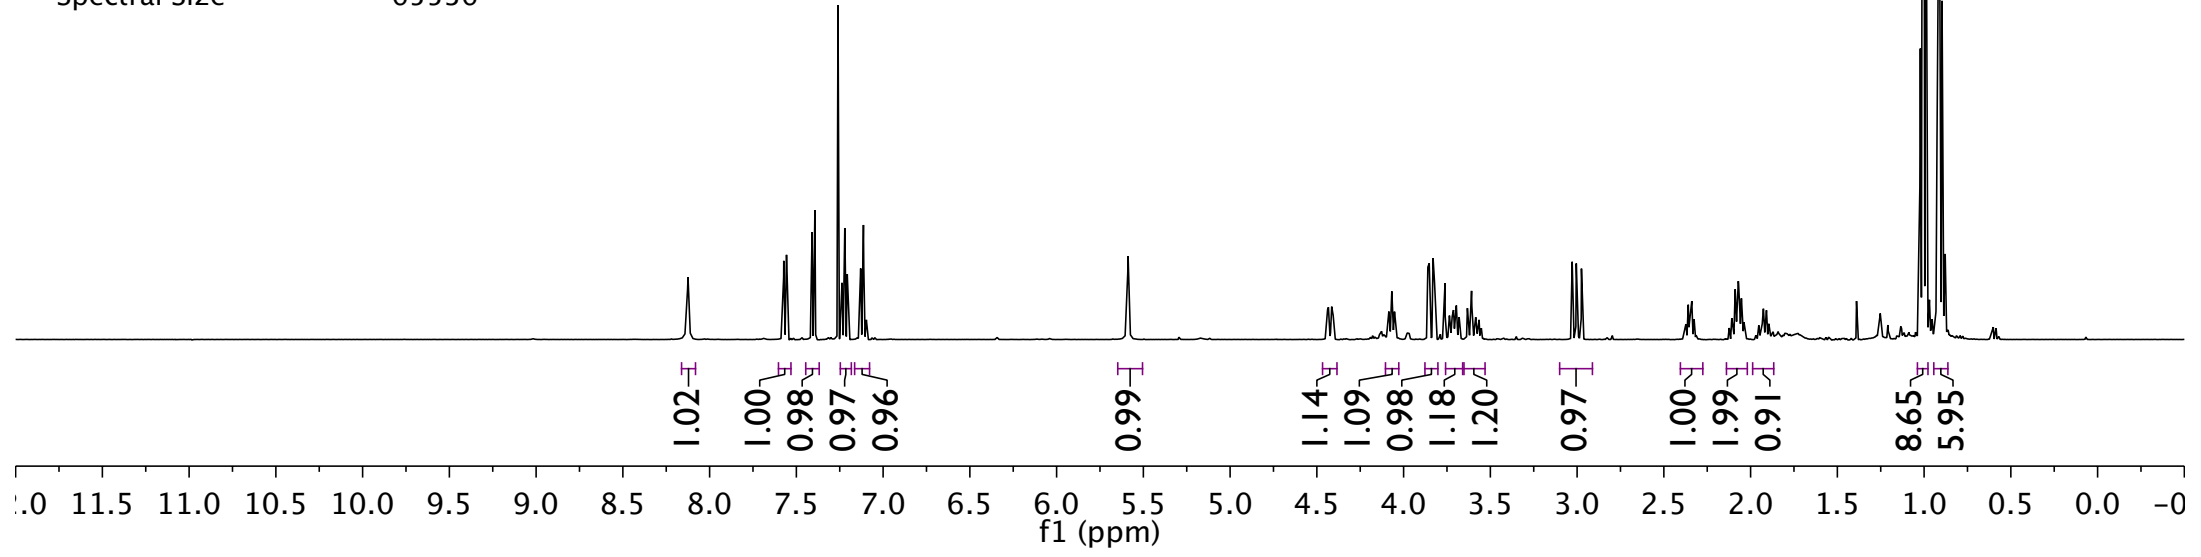

| Parameter              | Value                                                                     |
|------------------------|---------------------------------------------------------------------------|
| Data File Name         | / Volumes/ nmrdata/ mkieffer/ vnmrsys/ data/ MEK6062-B/ CARBON01.fid/ fid |
| Title                  | CARBON01                                                                  |
| Origin                 | Varian                                                                    |
| Solvent                | cdcl3                                                                     |
| Temperature            | 25.0                                                                      |
| Pulse Sequence         | s2pul                                                                     |
| Number of Scans        | 512                                                                       |
| Receiver Gain          | 30                                                                        |
| Relaxation Delay       | 1.0000                                                                    |
| Pulse Width            | 4.2500                                                                    |
| Acquisition Time       | 1.0420                                                                    |
| Acquisition Date       | 2013-09-09T22:46:52                                                       |
| Spectrometer Frequency | 125.66                                                                    |
| Spectral Width         | 31446.5                                                                   |
| Lowest Frequency       | -1884.7                                                                   |
| Nucleus                | <sup>13</sup> C                                                           |
| Acquired Size          | 32768                                                                     |
| Spectral Size          | 65536                                                                     |

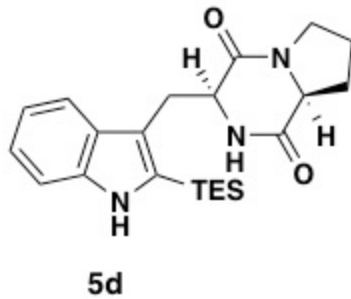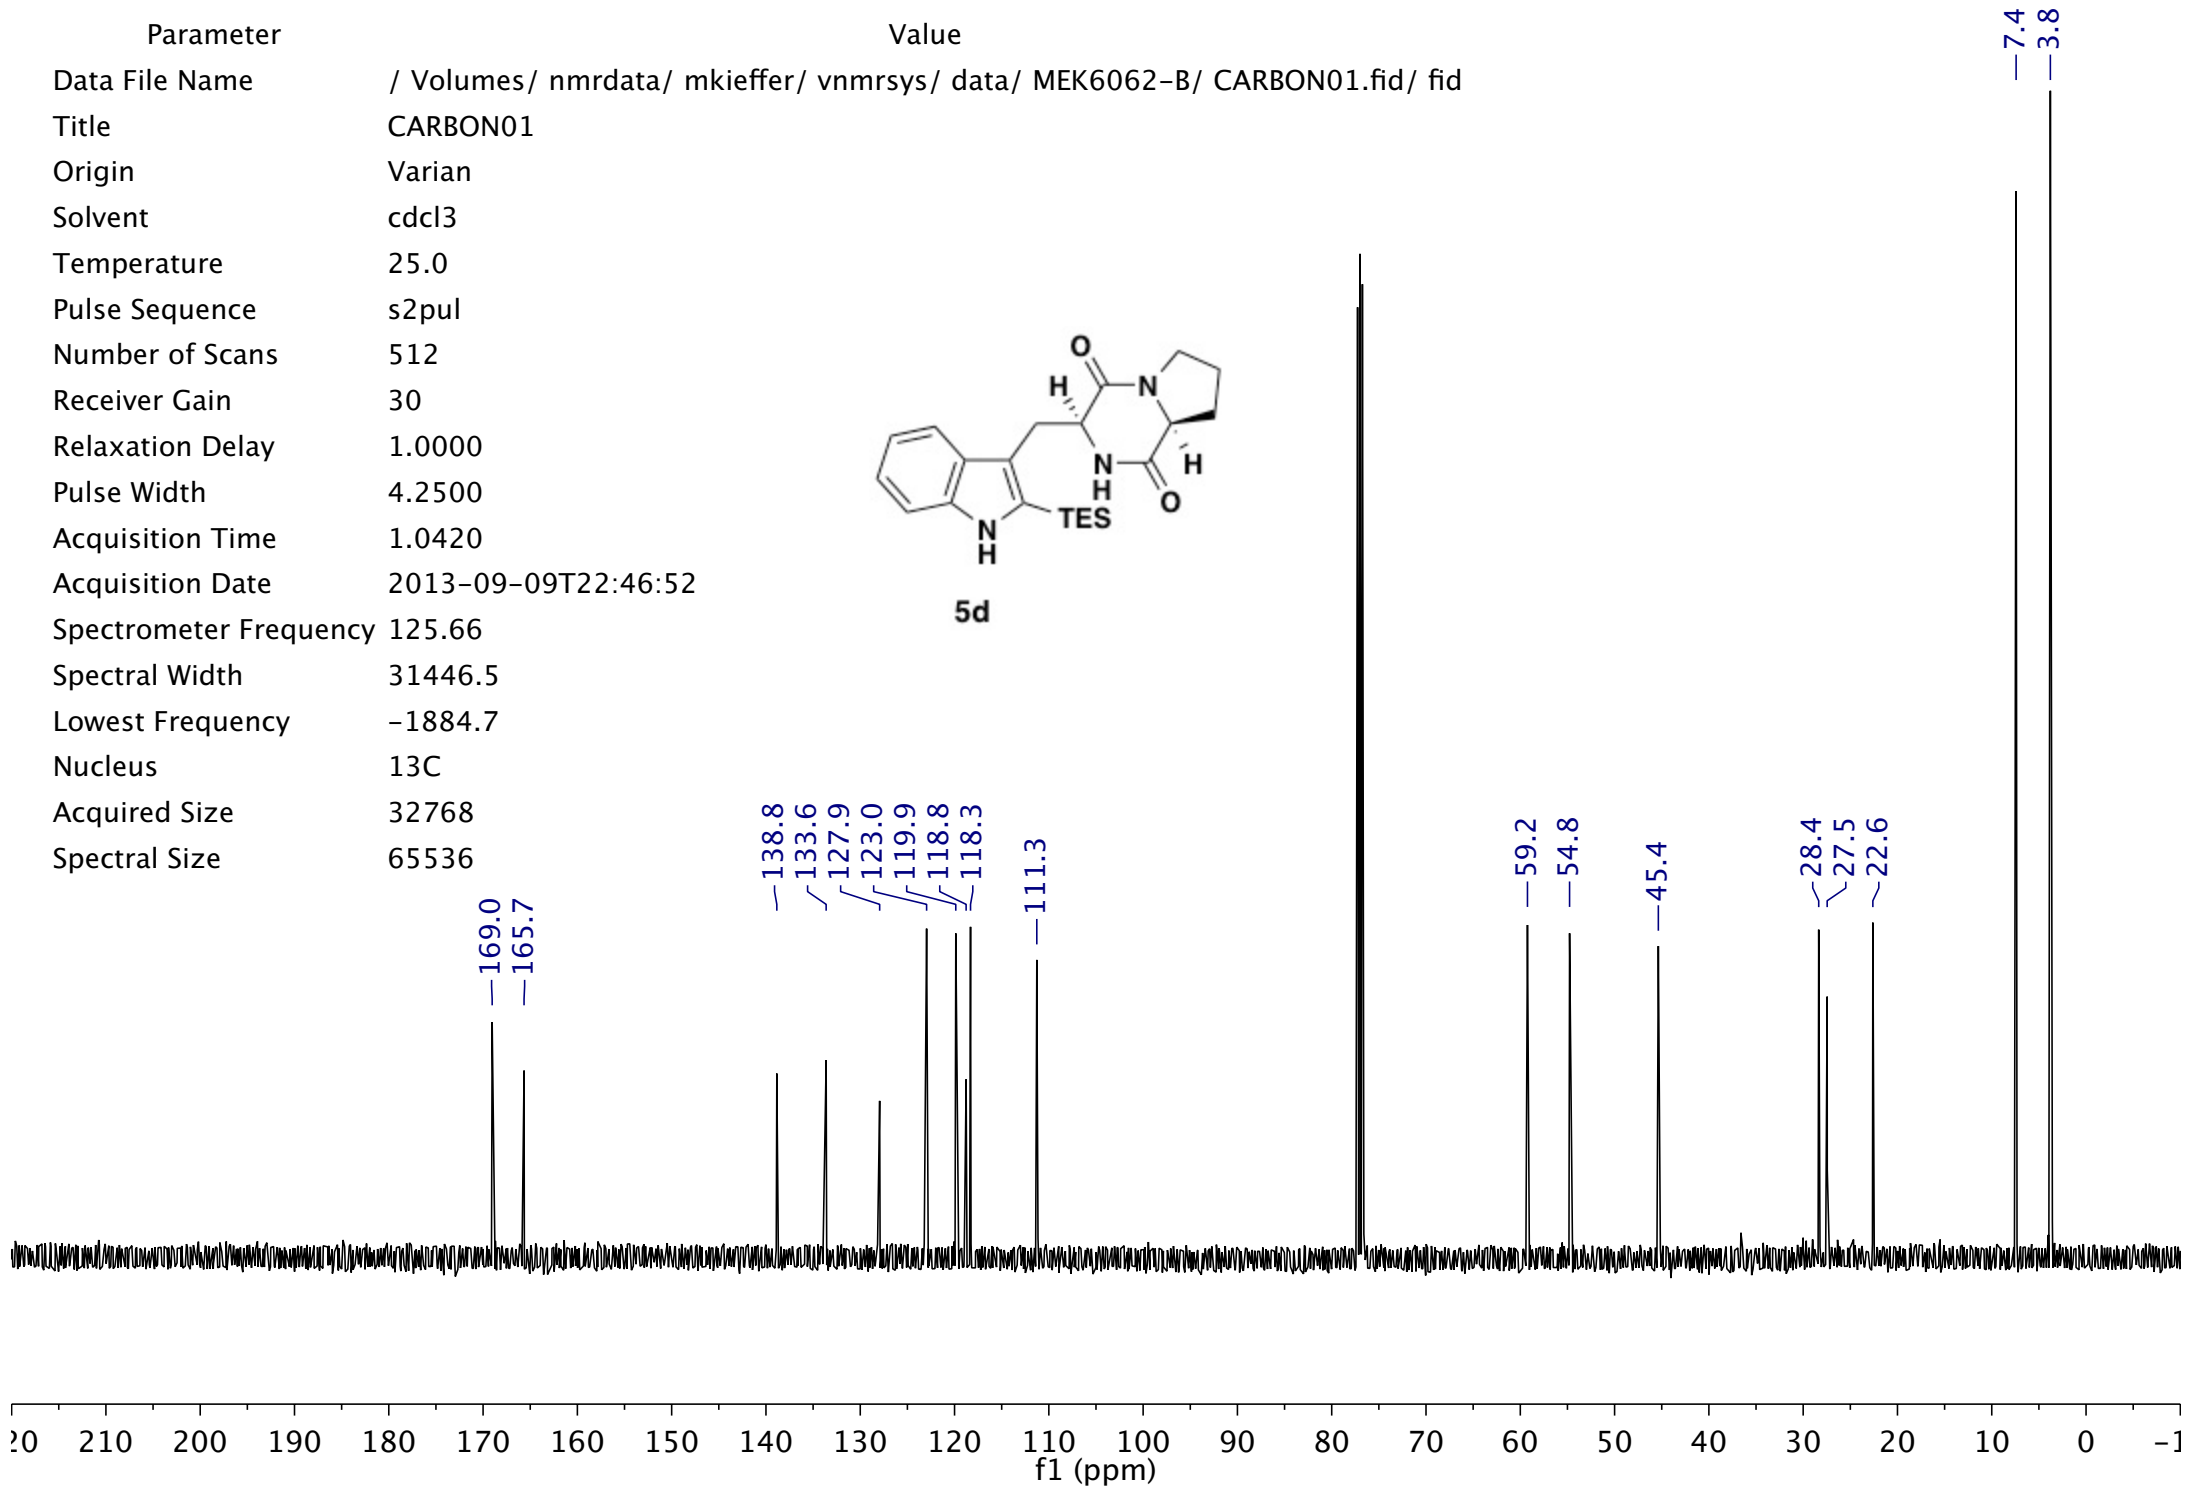

| Parameter | Value |
|-----------|-------|
| 9.25      |       |
| 8.40      |       |
| 7.32      |       |
| 7.30      |       |
| 7.30      |       |
| 7.15      |       |
| 7.13      |       |
| 7.09      |       |
| 7.08      |       |
| 7.06      |       |
| 6.93      |       |
| 6.92      |       |
| 4.50      |       |
| 4.49      |       |
| 4.49      |       |
| 4.48      |       |
| 4.47      |       |
| 3.61      |       |
| 3.60      |       |
| 3.60      |       |
| 3.59      |       |
| 3.56      |       |
| 3.55      |       |
| 3.44      |       |
| 3.42      |       |
| 3.41      |       |
| 3.39      |       |
| 3.16      |       |
| 3.14      |       |
| 3.13      |       |
| 3.11      |       |
| 2.16      |       |
| 1.82      |       |
| 1.82      |       |
| 1.81      |       |
| 1.80      |       |
| 1.80      |       |
| 1.01      |       |
| 1.00      |       |
| 1.00      |       |
| 1.00      |       |
| 1.00      |       |
| 0.99      |       |
| 0.99      |       |
| 0.98      |       |
| 0.98      |       |
| 0.98      |       |
| 0.97      |       |
| 0.97      |       |
| 0.96      |       |
| 0.96      |       |
| 0.95      |       |
| 0.95      |       |
| 0.95      |       |
| 0.94      |       |
| 0.94      |       |
| 0.93      |       |
| 0.93      |       |
| 0.93      |       |
| 0.92      |       |
| 0.92      |       |
| 0.83      |       |
| 0.82      |       |
| 0.67      |       |
| 0.66      |       |

Data File Name / Volumes/ data/ Indy/ mkieffer/ vhmrsys/ data/ MEK6247/ PROTON01.fid/ fid  
 Title PROTON01  
 Origin Varian  
 Solvent cd3cn  
 Temperature 25.0  
 Pulse Sequence s2pul  
 Number of Scans 32  
 Receiver Gain 24  
 Relaxation Delay 5.0000  
 Pulse Width 4.9500  
 Acquisition Time 3.0000  
 Acquisition Date 2014-07-11T04:22:38  
 Spectrometer Frequency 499.69  
 Spectral Width 8000.0  
 Lowest Frequency -1019.3  
 Nucleus 1H  
 Acquired Size 24000  
 Spectral Size 65536

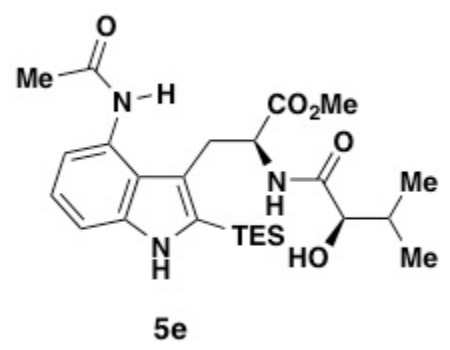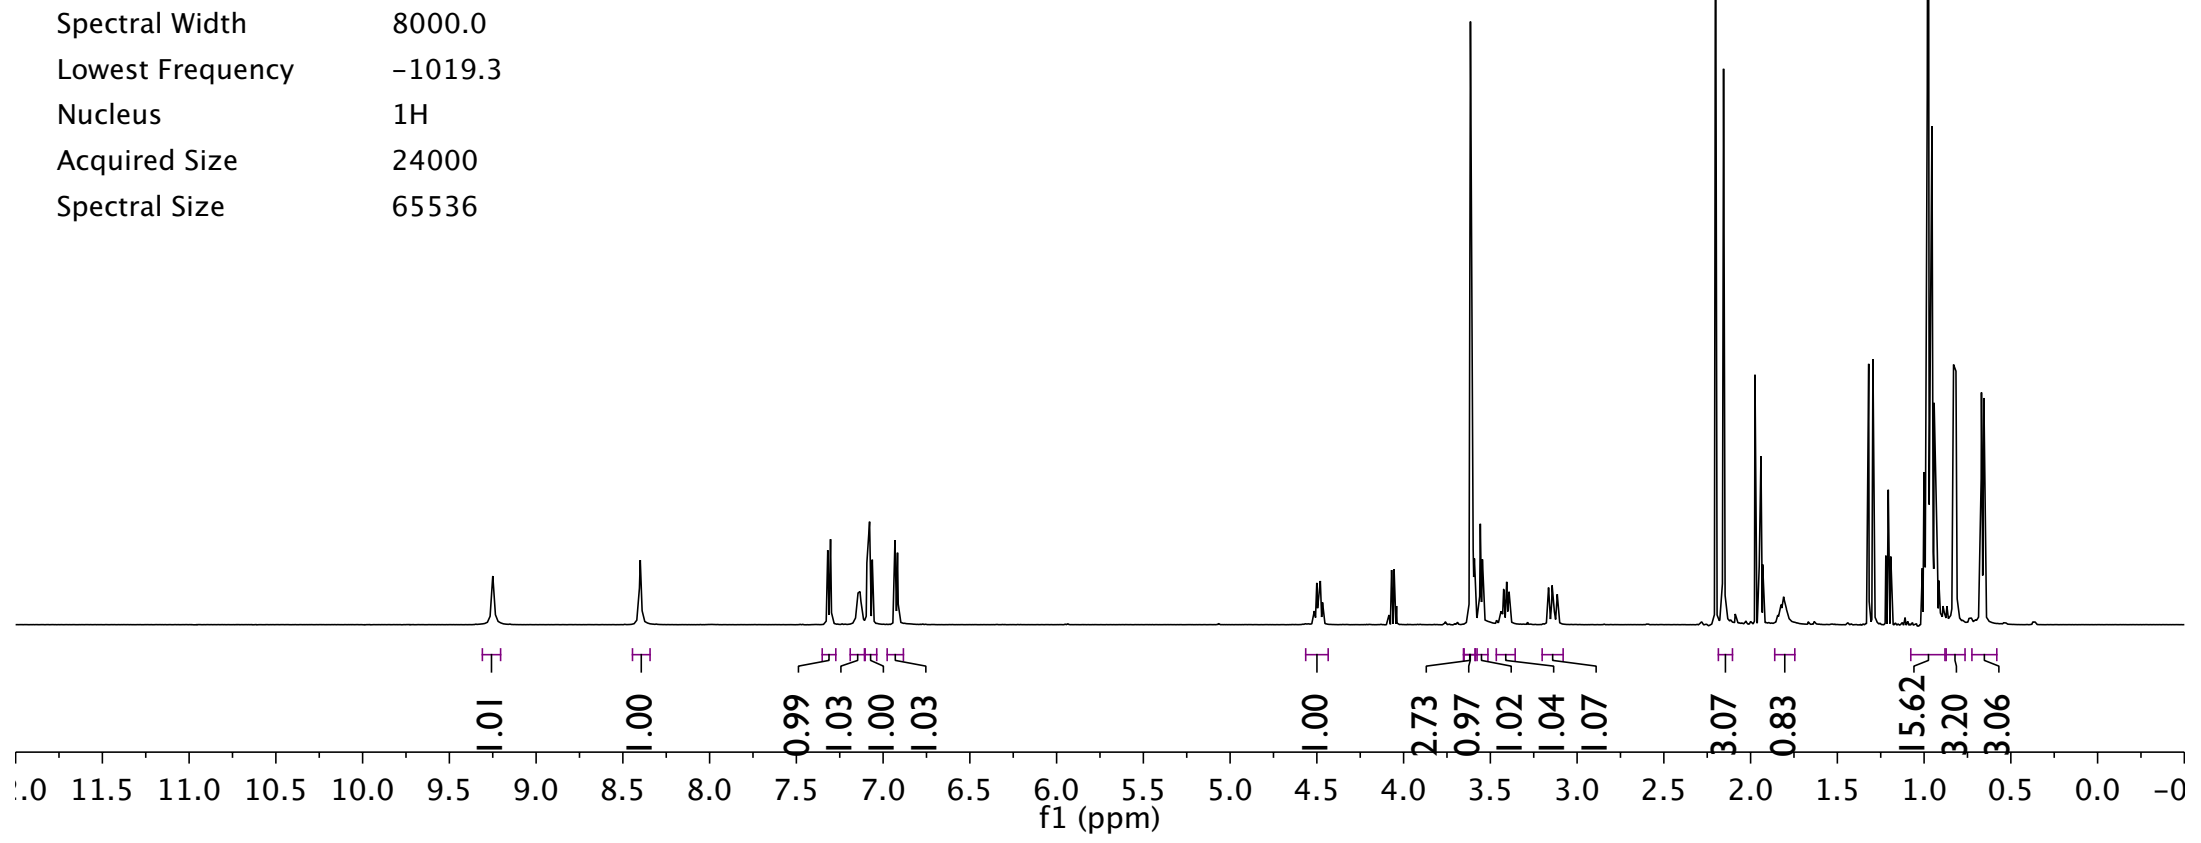

| Parameter              | Value                                                                      |
|------------------------|----------------------------------------------------------------------------|
| Data File Name         | / Volumes/ data/ indy/ mkieffer/ vnmrsys/ data/ MEK6247/ CARBON01.fid/ fid |
| Title                  | CARBON01                                                                   |
| Origin                 | Varian                                                                     |
| Solvent                | cd3cn                                                                      |
| Temperature            | 25.0                                                                       |
| Pulse Sequence         | s2pul                                                                      |
| Number of Scans        | 2000                                                                       |
| Receiver Gain          | 30                                                                         |
| Relaxation Delay       | 1.0000                                                                     |
| Pulse Width            | 4.2500                                                                     |
| Acquisition Time       | 1.0420                                                                     |
| Acquisition Date       | 2014-07-11T04:27:17                                                        |
| Spectrometer Frequency | 125.66                                                                     |
| Spectral Width         | 31446.5                                                                    |
| Lowest Frequency       | -1786.4                                                                    |
| Nucleus                | <sup>13</sup> C                                                            |
| Acquired Size          | 32768                                                                      |
| Spectral Size          | 65536                                                                      |

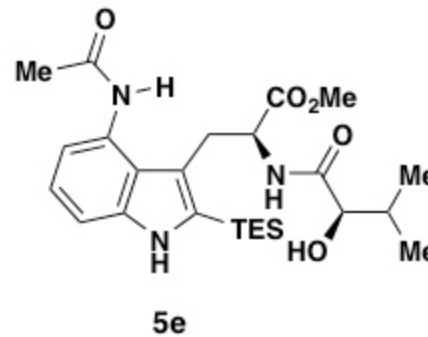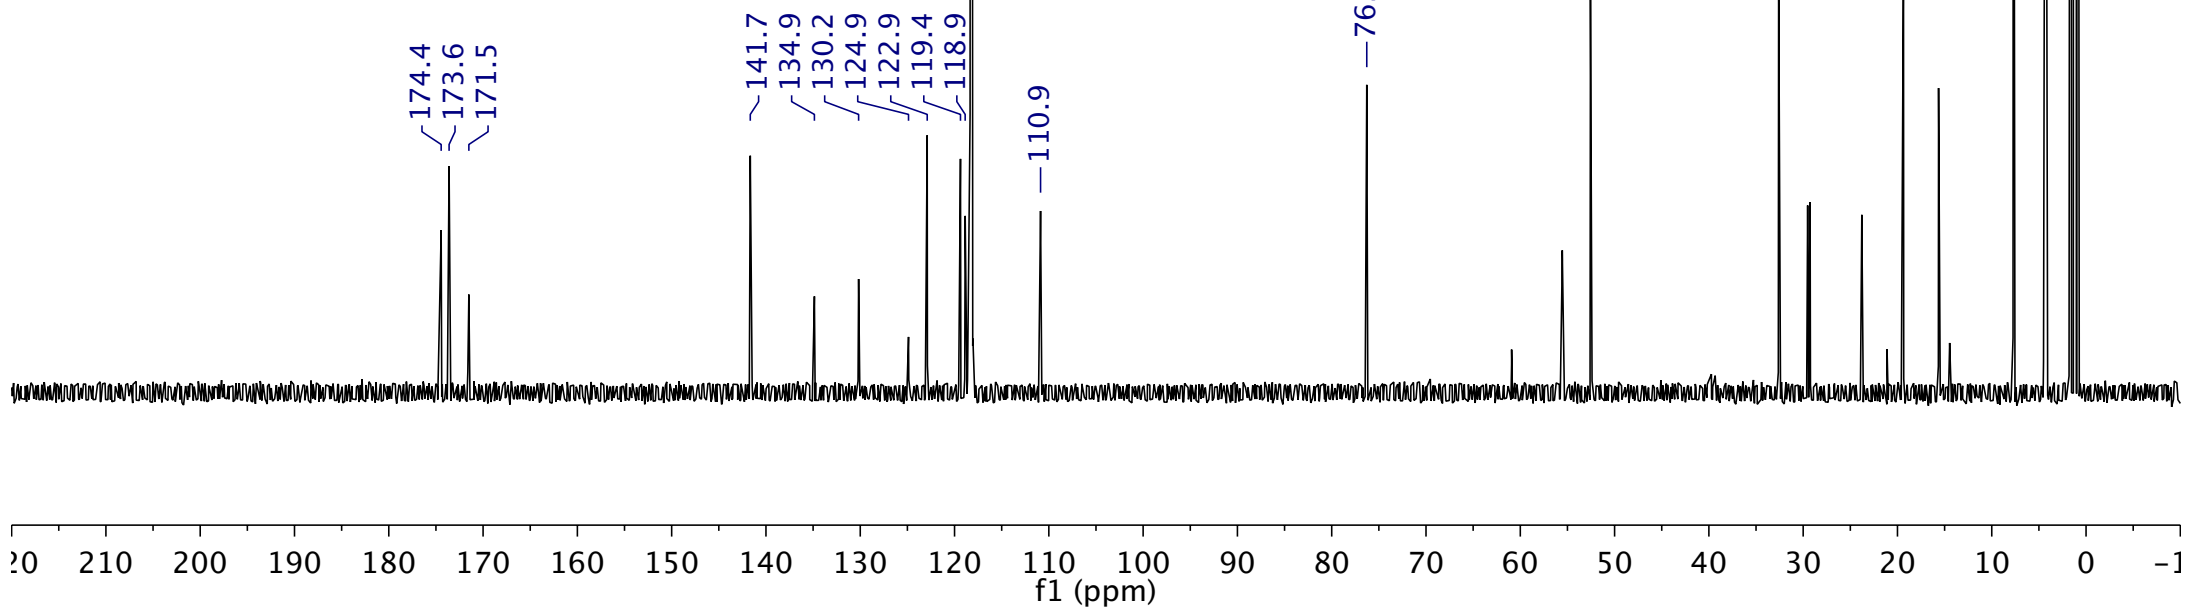

10.06  
8.24  
8.24  
8.23  
8.23  
8.22  
8.20  
8.20  
8.19  
8.18  
7.91  
7.91  
7.89  
7.89  
7.20  
7.07  
7.06  
7.06  
7.05  
5.64  
5.63  
4.47  
4.46  
4.45  
4.44  
4.44  
4.43  
3.67  
3.64  
3.62  
3.25  
3.24  
3.22  
3.21  
3.13  
3.12  
3.10  
3.09  
1.47  
1.44  
1.41  
1.41  
1.40  
1.40  
1.39  
1.39  
1.37  
1.37  
1.34  
1.32  
1.29  
1.26  
1.26  
1.22  
1.21  
1.20

| Parameter              | Value                                                                      |
|------------------------|----------------------------------------------------------------------------|
| Data File Name         | / Volumes/ data/ indy/ mkieffer/ vnmrsys/ data/ MEK7013/ PROTON01.fid/ fid |
| Title                  | PROTON01                                                                   |
| Origin                 | Varian                                                                     |
| Solvent                | cd3cn                                                                      |
| Temperature            | 25.0                                                                       |
| Pulse Sequence         | s2pul                                                                      |
| Number of Scans        | 32                                                                         |
| Receiver Gain          | 28                                                                         |
| Relaxation Delay       | 5.0000                                                                     |
| Pulse Width            | 5.9000                                                                     |
| Acquisition Time       | 3.0000                                                                     |
| Acquisition Date       | 2015-02-23T17:05:11                                                        |
| Spectrometer Frequency | 499.68                                                                     |
| Spectral Width         | 8000.0                                                                     |
| Lowest Frequency       | -1039.5                                                                    |
| Nucleus                | 1H                                                                         |
| Acquired Size          | 24000                                                                      |
| Spectral Size          | 65536                                                                      |

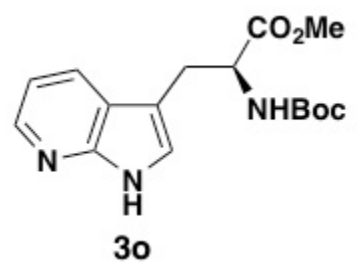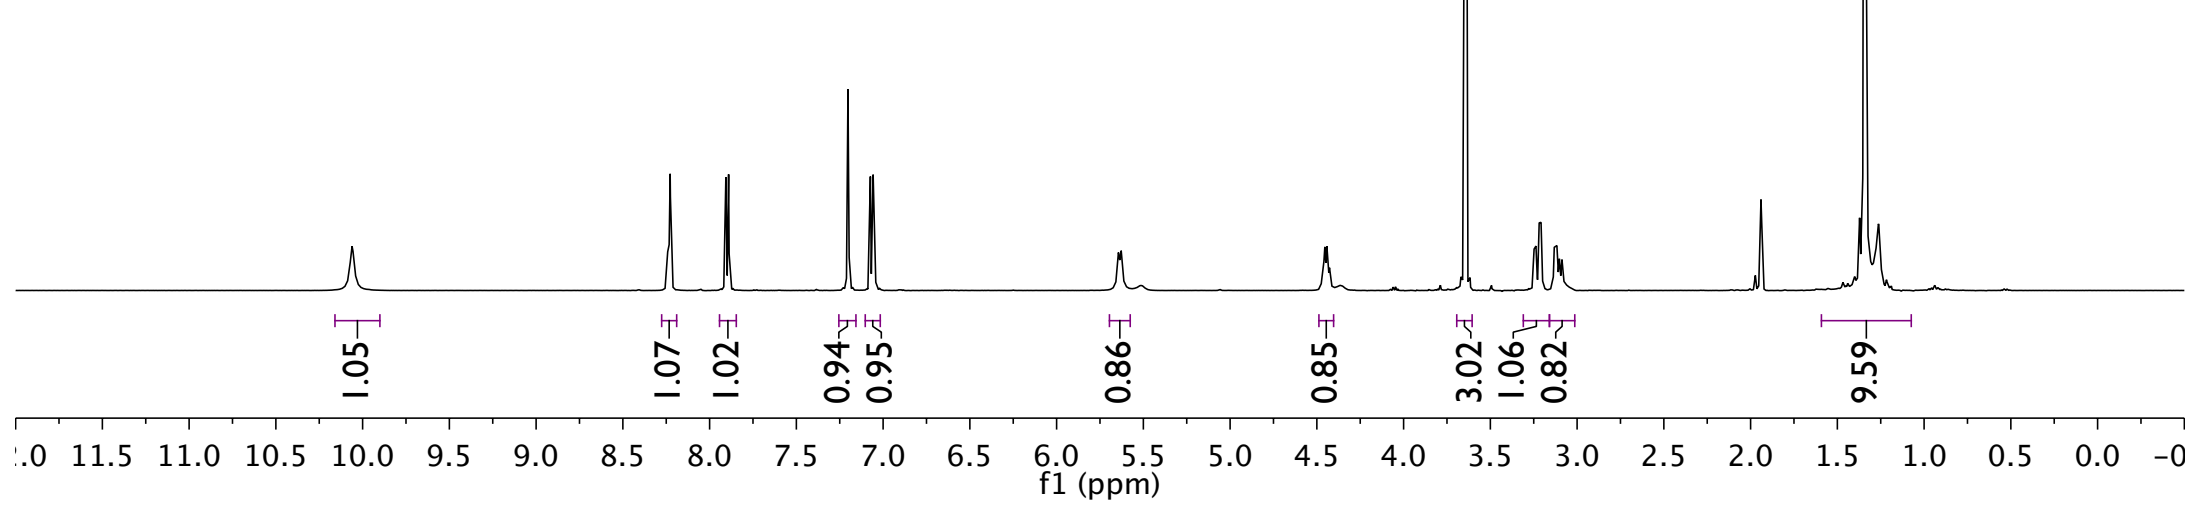

| Parameter              | Value                                                                      |
|------------------------|----------------------------------------------------------------------------|
| Data File Name         | / Volumes/ data/ indy/ mkieffer/ vnmrsys/ data/ MEK7013/ CARBON01.fid/ fid |
| Title                  | CARBON01                                                                   |
| Origin                 | Varian                                                                     |
| Solvent                | cd3cn                                                                      |
| Temperature            | 25.0                                                                       |
| Pulse Sequence         | s2pul                                                                      |
| Number of Scans        | 512                                                                        |
| Receiver Gain          | 30                                                                         |
| Relaxation Delay       | 1.0000                                                                     |
| Pulse Width            | 4.5000                                                                     |
| Acquisition Time       | 1.0420                                                                     |
| Acquisition Date       | 2015-02-23T17:09:44                                                        |
| Spectrometer Frequency | 125.66                                                                     |
| Spectral Width         | 31446.5                                                                    |
| Lowest Frequency       | -1790.0                                                                    |
| Nucleus                | <sup>13</sup> C                                                            |
| Acquired Size          | 32768                                                                      |
| Spectral Size          | 65536                                                                      |

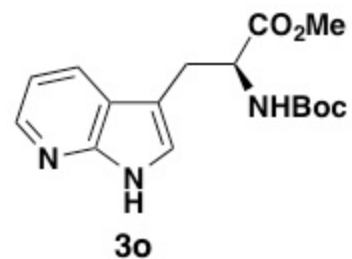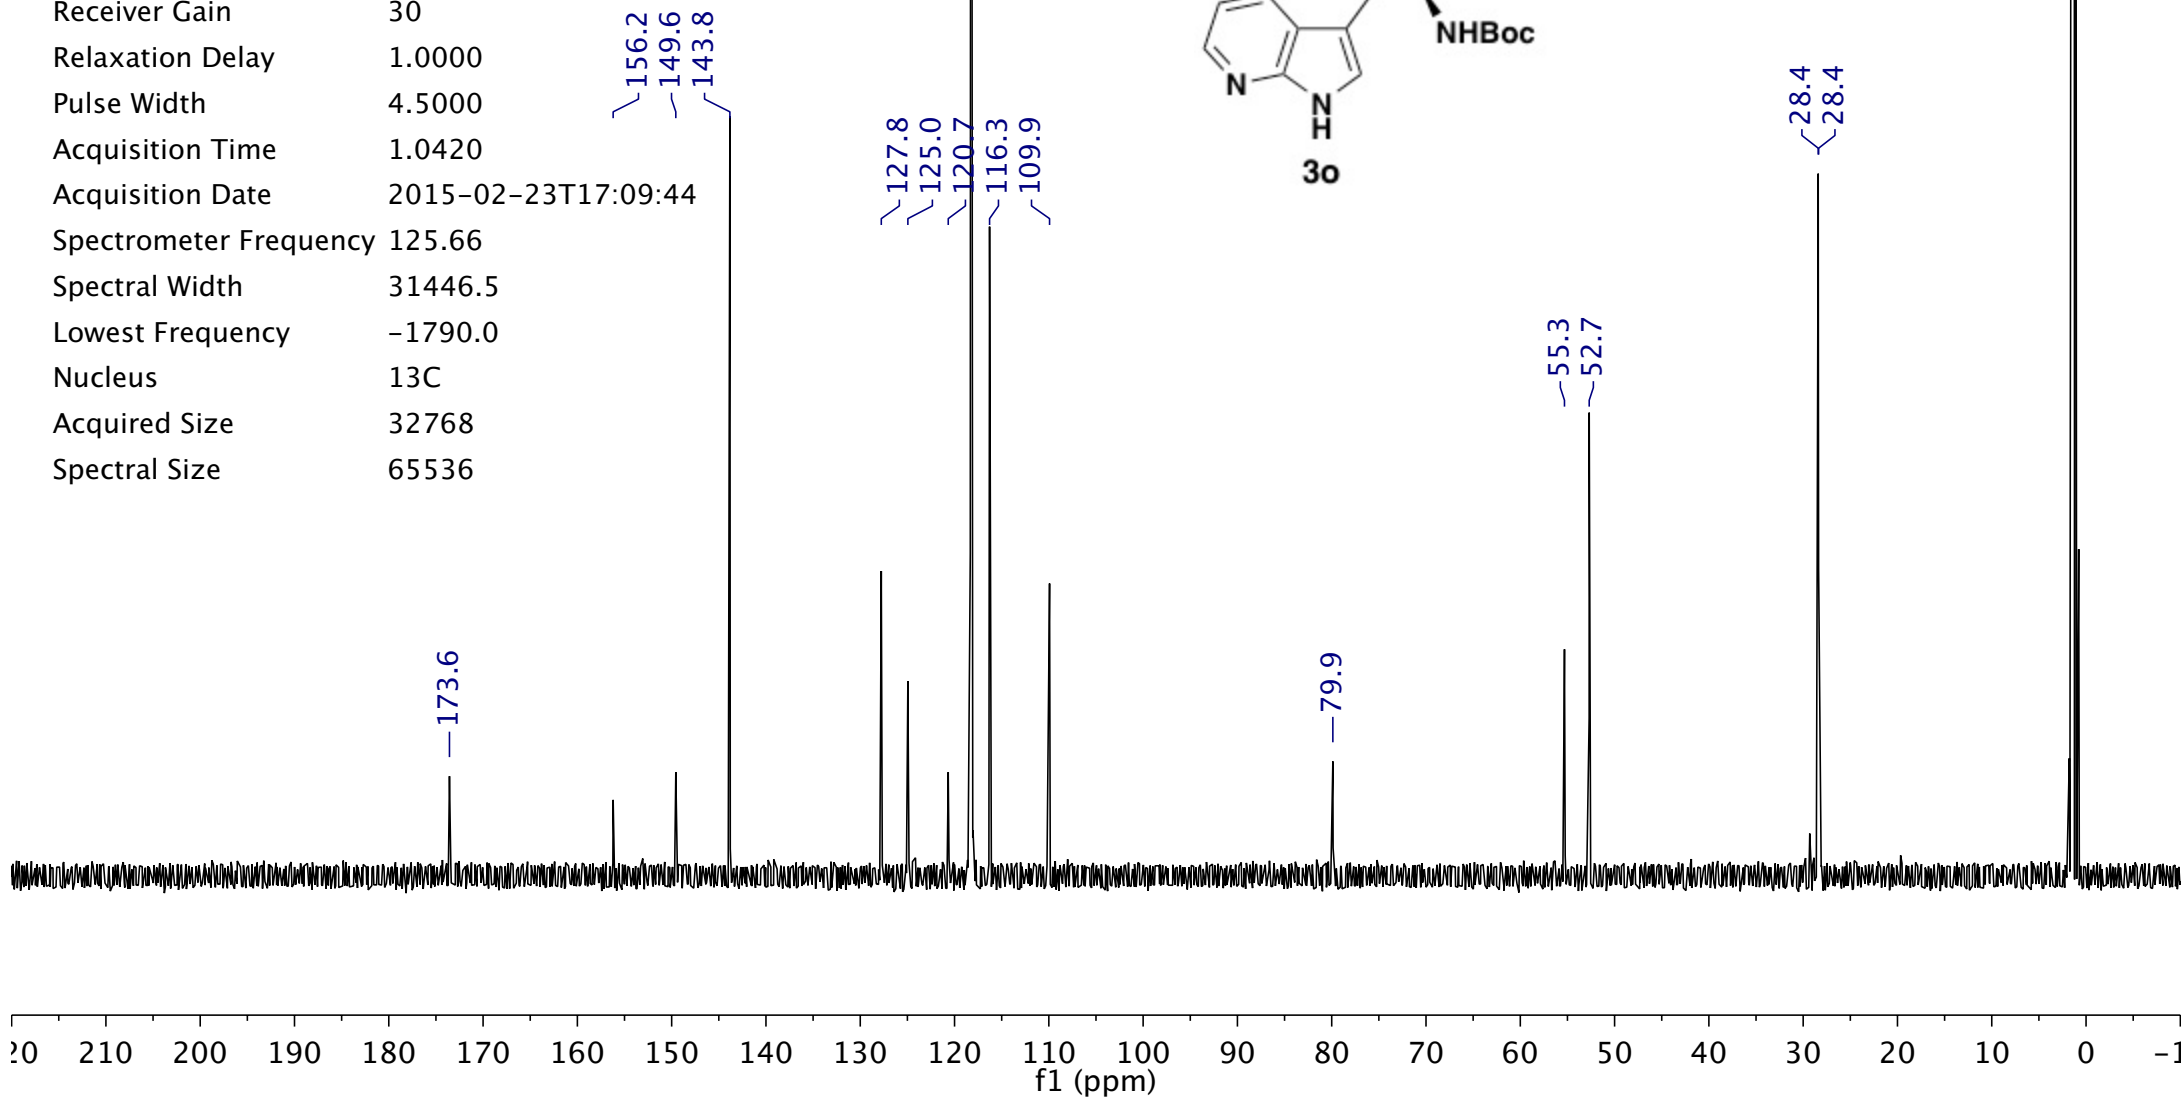

| Parameter | Value |
|-----------|-------|
| 7.63      |       |
| 7.63      |       |
| 7.61      |       |
| 7.61      |       |
| 7.40      |       |
| 7.38      |       |
| 7.35      |       |
| 7.35      |       |
| 7.33      |       |
| 7.33      |       |
| 7.28      |       |
| 7.28      |       |
| 7.26      |       |
| 7.26      |       |
| 7.26      |       |
| 7.26      |       |
| 7.25      |       |
| 7.25      |       |
| 6.87      |       |
| 6.87      |       |
| 6.86      |       |
| 6.86      |       |
| 6.86      |       |
| 6.85      |       |
| 6.84      |       |
| 6.84      |       |
| 6.59      |       |
| 6.59      |       |
| 6.53      |       |
| 6.52      |       |
| 6.51      |       |
| 6.51      |       |
| 6.18      |       |
| 6.17      |       |
| 6.17      |       |
| 6.06      |       |
| 6.05      |       |
| 4.15      |       |
| 4.14      |       |

Data File Name / Volumes/ data/ indy/ mkieffer/ vnmrsys/ data/ MEK7017/ PROTON01.fid/ fid  
 Title PROTON01  
 Origin Varian  
 Solvent cdcl3  
 Temperature 25.0  
 Pulse Sequence s2pul  
 Number of Scans 16  
 Receiver Gain 16  
 Relaxation Delay 5.0000  
 Pulse Width 4.9500  
 Acquisition Time 3.0000  
 Acquisition Date 2015-01-15T22:20:38  
 Spectrometer Frequency 499.68  
 Spectral Width 8000.0  
 Lowest Frequency -986.9  
 Nucleus 1H  
 Acquired Size 24000  
 Spectral Size 65536

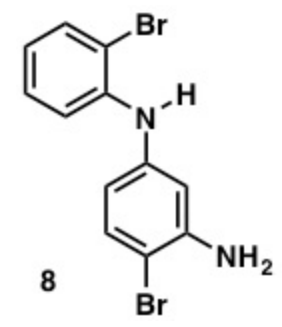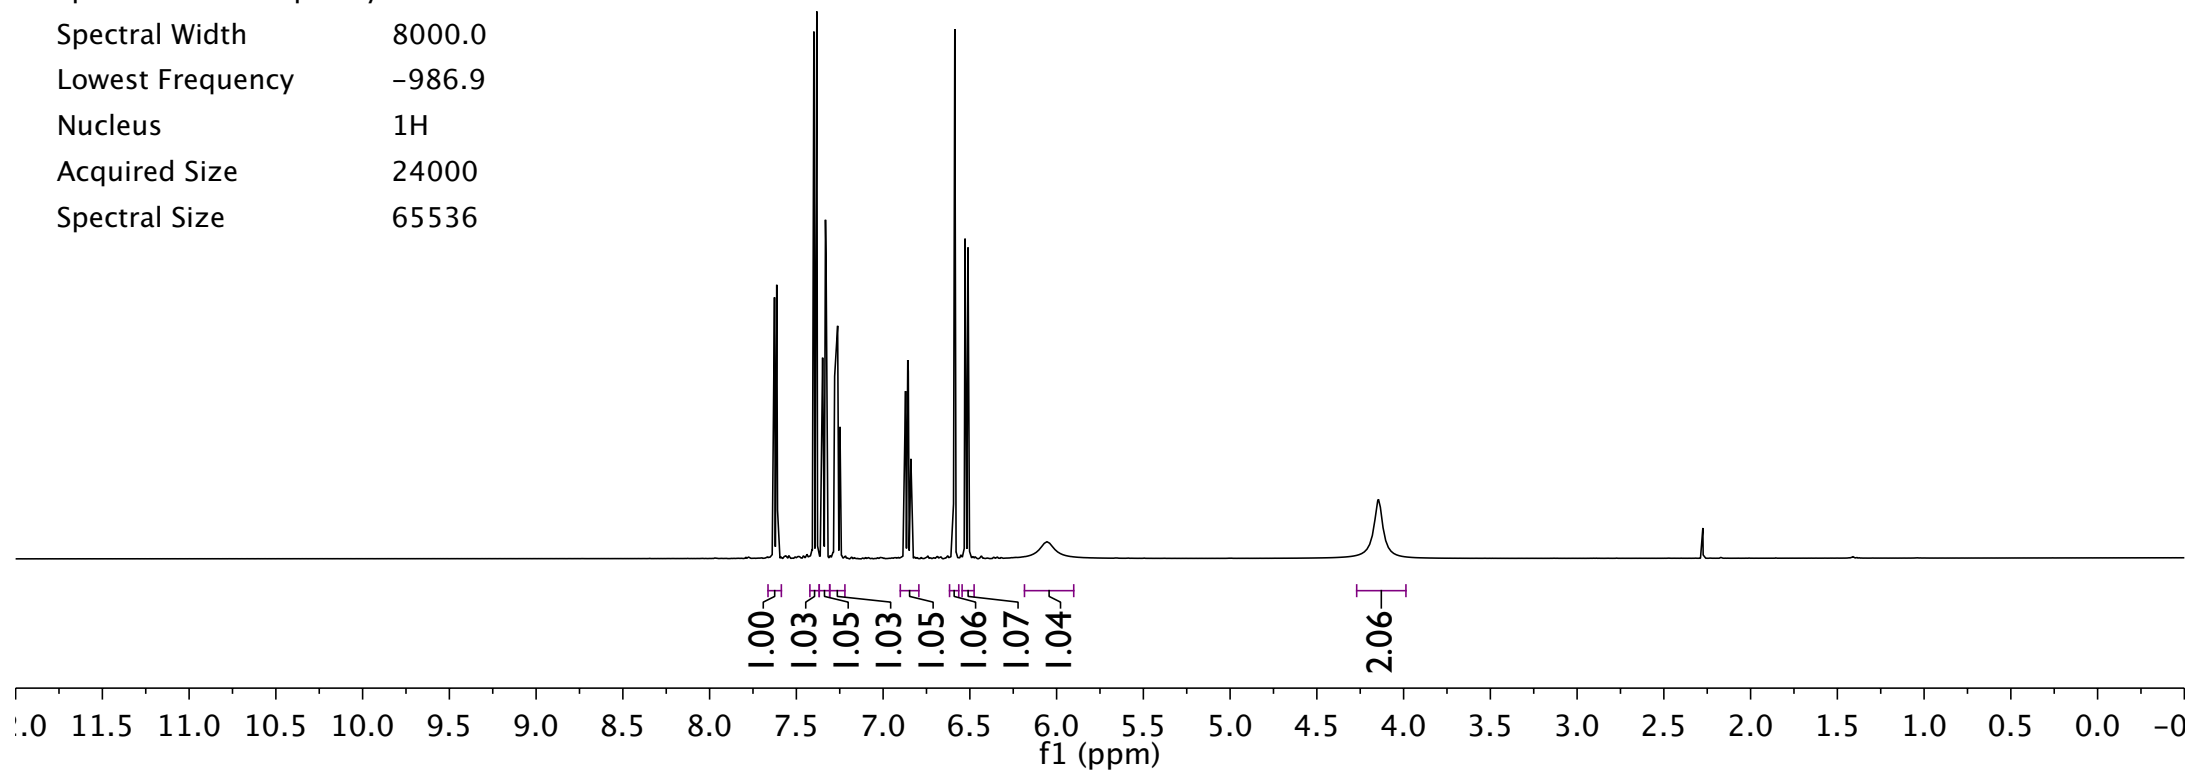

| Parameter              | Value                                                                      |
|------------------------|----------------------------------------------------------------------------|
| Data File Name         | / Volumes/ data/ indy/ mkieffer/ vnmrsys/ data/ MEK7017/ CARBON01.fid/ fid |
| Title                  | CARBON01                                                                   |
| Origin                 | Varian                                                                     |
| Solvent                | cdcl3                                                                      |
| Temperature            | 25.0                                                                       |
| Pulse Sequence         | s2pul                                                                      |
| Number of Scans        | 256                                                                        |
| Receiver Gain          | 30                                                                         |
| Relaxation Delay       | 1.0000                                                                     |
| Pulse Width            | 4.2500                                                                     |
| Acquisition Time       | 1.0420                                                                     |
| Acquisition Date       | 2015-01-15T22:23:02                                                        |
| Spectrometer Frequency | 125.66                                                                     |
| Spectral Width         | 31446.5                                                                    |
| Lowest Frequency       | -1915.2                                                                    |
| Nucleus                | <sup>13</sup> C                                                            |
| Acquired Size          | 32768                                                                      |
| Spectral Size          | 65536                                                                      |

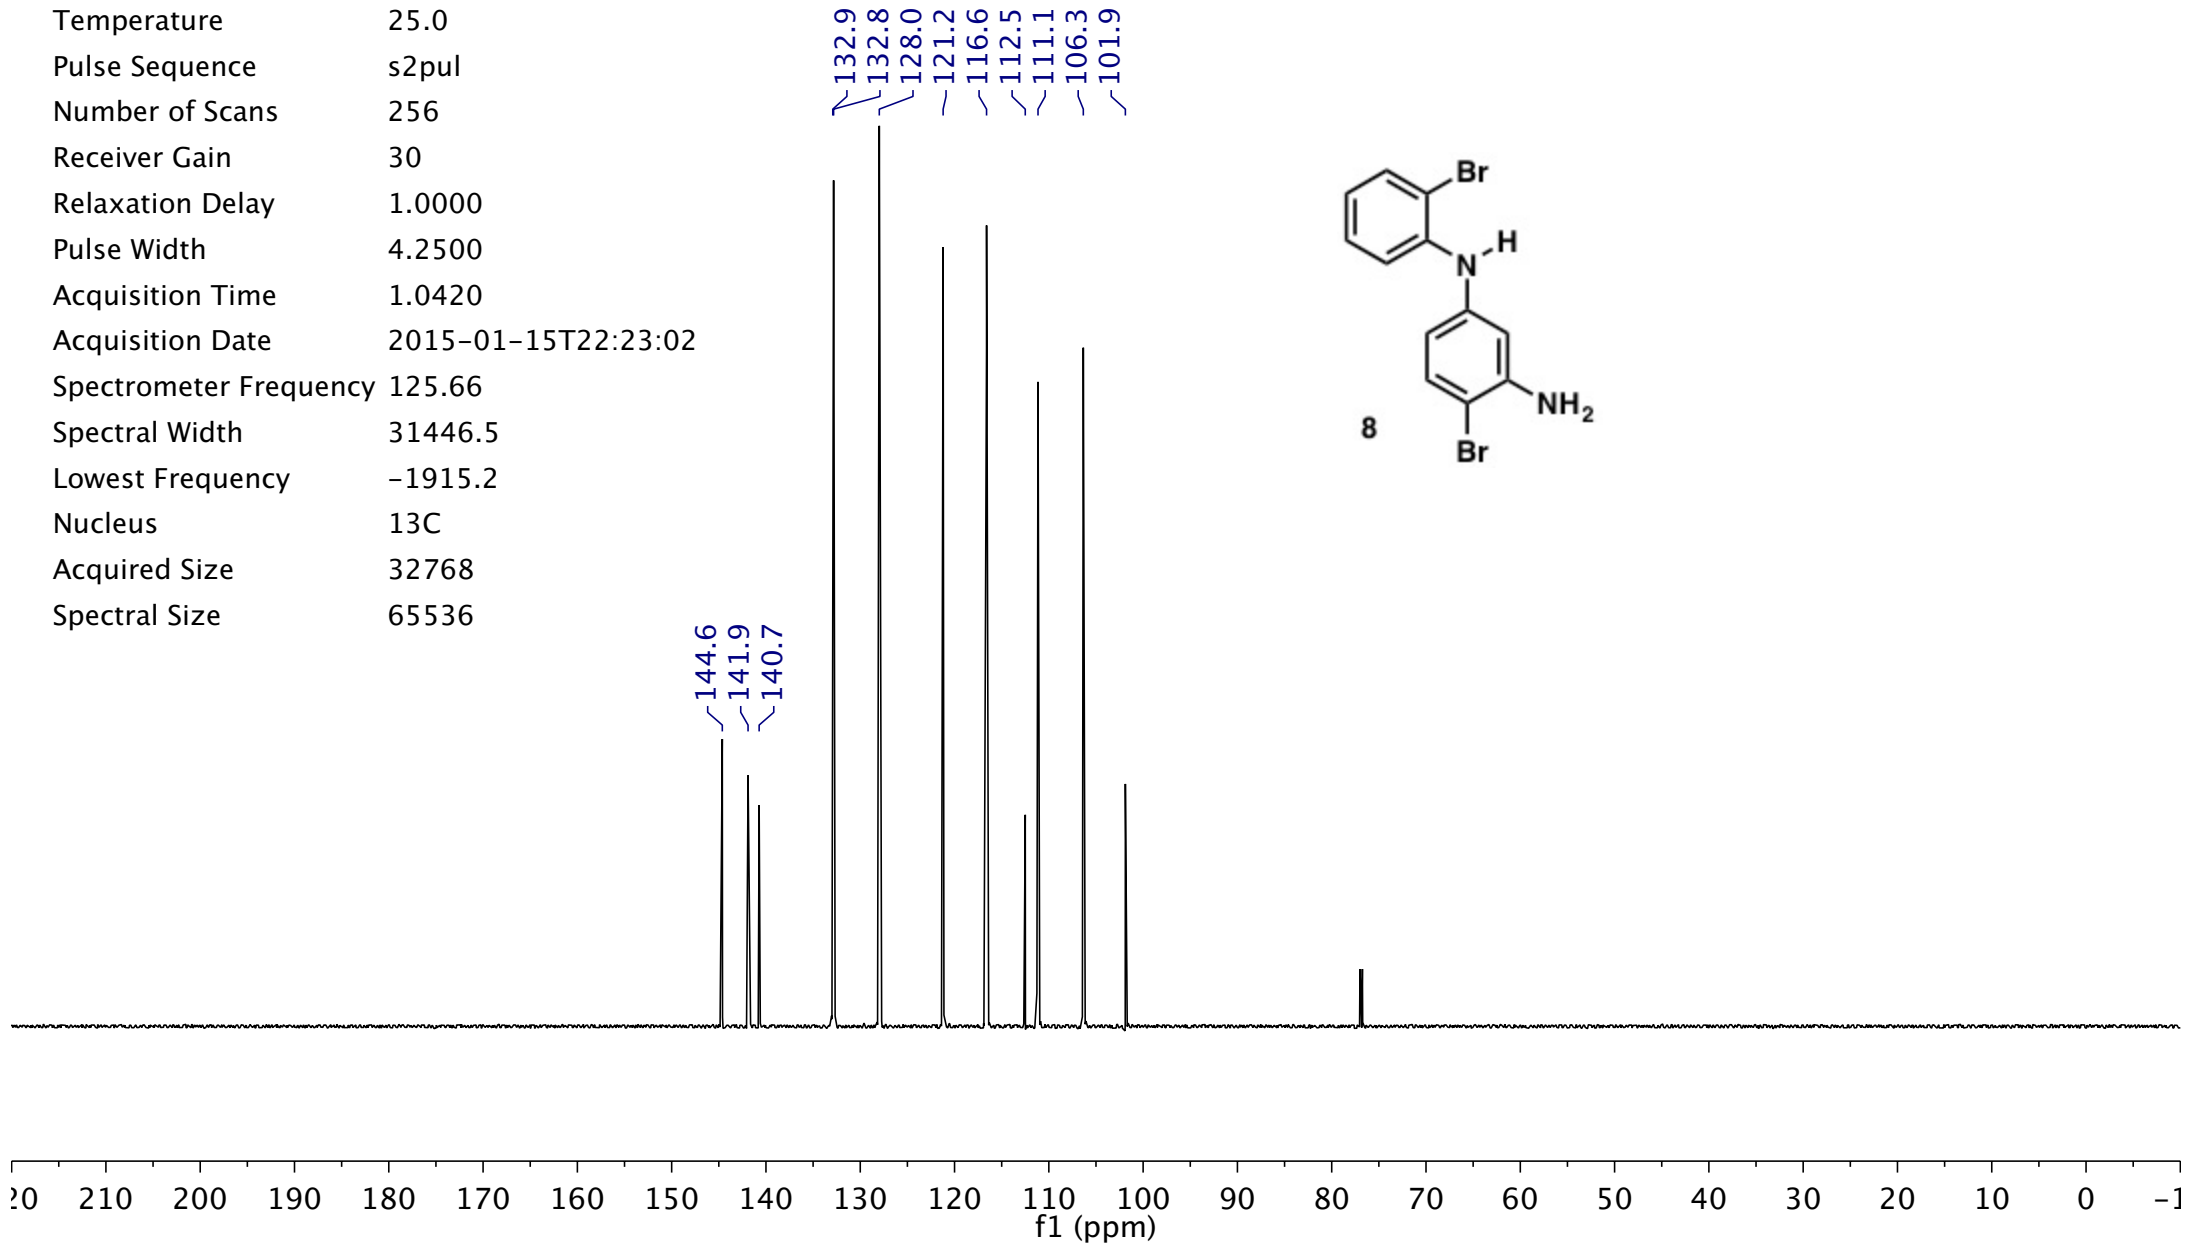







7.70  
7.66  
7.64  
7.50  
7.50  
7.47  
7.46  
7.10  
7.09  
7.08  
7.08  
7.07  
5.59  
5.47  
4.43  
4.12  
4.10  
3.76  
3.57  
3.48  
3.47  
3.46  
2.21  
2.20  
2.19  
1.97  
1.96  
1.96  
1.95  
1.95  
1.94  
1.93  
1.93  
1.92  
1.91  
1.91  
1.89  
1.89  
1.03  
1.02  
1.00  
1.00  
0.99  
0.98  
0.97  
0.96  
0.96  
0.95  
0.94  
0.94  
0.86  
0.84  
0.84  
0.82  
0.82  
0.80  
0.59  
0.58  
0.57  
0.56  
0.55  
0.54  
0.54  
0.53  
0.52

| Parameter              | Value                                                                             |
|------------------------|-----------------------------------------------------------------------------------|
| Data File Name         | / Volumes/ data/ siena/ mkieffe1/ vnmrsys/ data/ MEK-asp-silyl/ PROTON01.fid/ fid |
| Title                  | PROTON01                                                                          |
| Origin                 | Varian                                                                            |
| Solvent                | cd3cn                                                                             |
| Temperature            | 25.0                                                                              |
| Pulse Sequence         | s2pul                                                                             |
| Number of Scans        | 8                                                                                 |
| Receiver Gain          | 30                                                                                |
| Relaxation Delay       | 2.0000                                                                            |
| Pulse Width            | 4.2500                                                                            |
| Acquisition Time       | 2.5559                                                                            |
| Acquisition Date       | 2015-03-01T13:30:55                                                               |
| Spectrometer Frequency | 399.80                                                                            |
| Spectral Width         | 6410.3                                                                            |
| Lowest Frequency       | -815.6                                                                            |
| Nucleus                | 1H                                                                                |
| Acquired Size          | 16384                                                                             |
| Spectral Size          | 65536                                                                             |

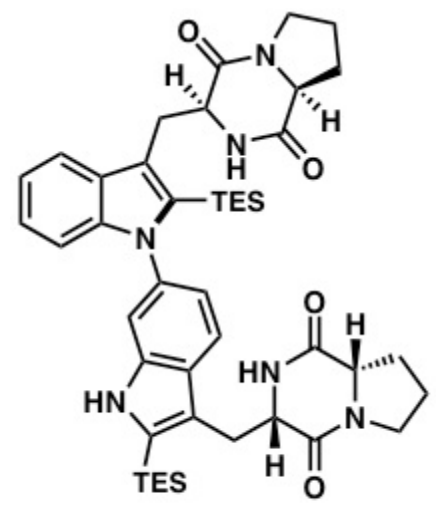

SI-IV, CD<sub>3</sub>CN, 25 °C

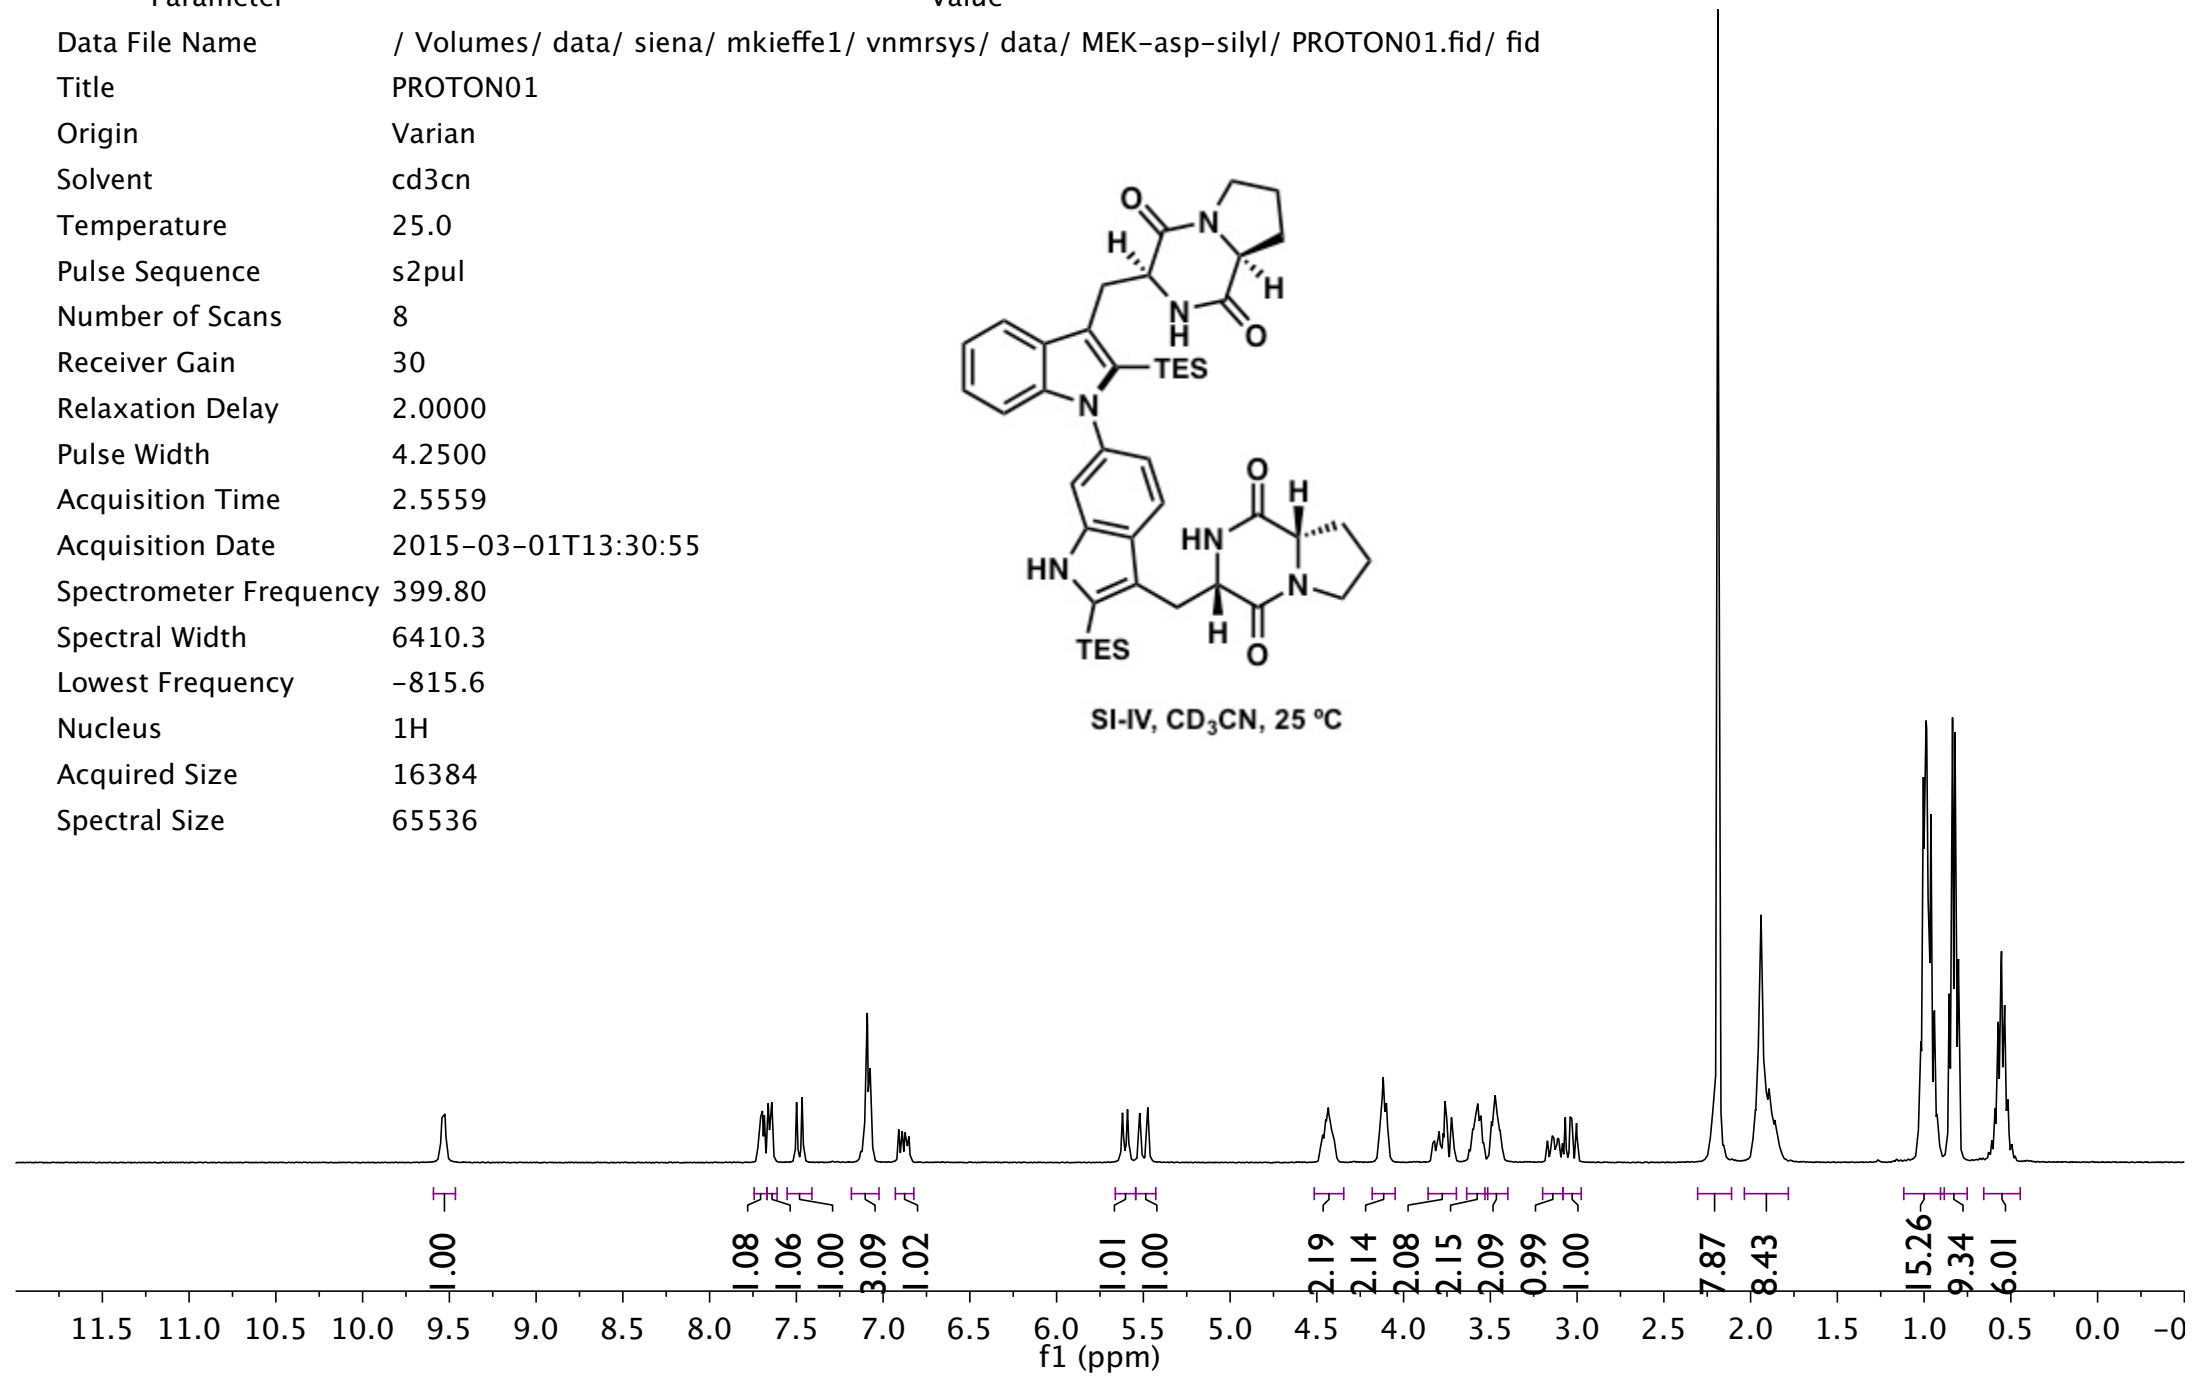

7.73  
7.71  
7.68  
7.66  
7.66  
7.48  
7.13  
7.12  
7.12  
7.10  
7.10  
7.10  
7.08  
7.07  
5.58  
5.47  
4.45  
4.14  
4.13  
4.11  
3.64  
3.63  
3.50  
3.48  
3.48  
3.47  
2.24  
2.23  
2.23  
2.22  
2.22  
1.99  
1.98  
1.97  
1.96  
1.96  
1.95  
1.95  
1.94  
1.93  
1.93  
1.92  
1.06  
1.05  
1.04  
1.04  
1.02  
1.02  
1.01  
1.01  
0.99  
0.98  
0.97  
0.96  
0.87  
0.85  
0.83  
0.62  
0.62  
0.61  
0.60  
0.59  
0.58  
0.57  
0.56

| Parameter              | Value                                                                                     |
|------------------------|-------------------------------------------------------------------------------------------|
| Data File Name         | / Volumes/ nmrdata-1/ mkieffe1/ vnmrsys/ data/ MEK-asp-silyl-60degrees/ PROTON01.fid/ fid |
| Title                  | PROTON01                                                                                  |
| Origin                 | Varian                                                                                    |
| Solvent                | cd3cn                                                                                     |
| Temperature            | 61.0                                                                                      |
| Pulse Sequence         | s2pul                                                                                     |
| Number of Scans        | 32                                                                                        |
| Receiver Gain          | 50                                                                                        |
| Relaxation Delay       | 5.0000                                                                                    |
| Pulse Width            | 4.2500                                                                                    |
| Acquisition Time       | 2.5559                                                                                    |
| Acquisition Date       | 2015-03-01T13:53:15                                                                       |
| Spectrometer Frequency | 399.80                                                                                    |
| Spectral Width         | 6410.3                                                                                    |
| Lowest Frequency       | -806.4                                                                                    |
| Nucleus                | 1H                                                                                        |
| Acquired Size          | 16384                                                                                     |
| Spectral Size          | 65536                                                                                     |

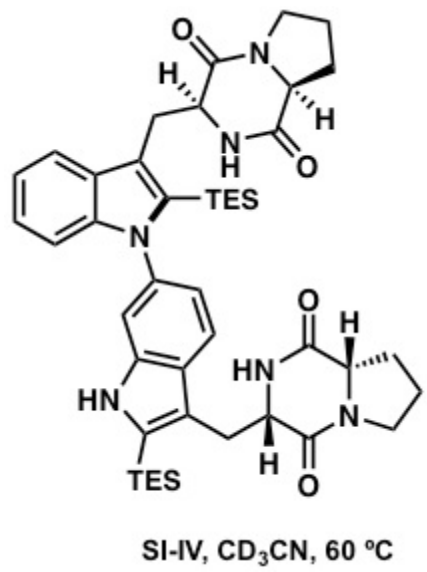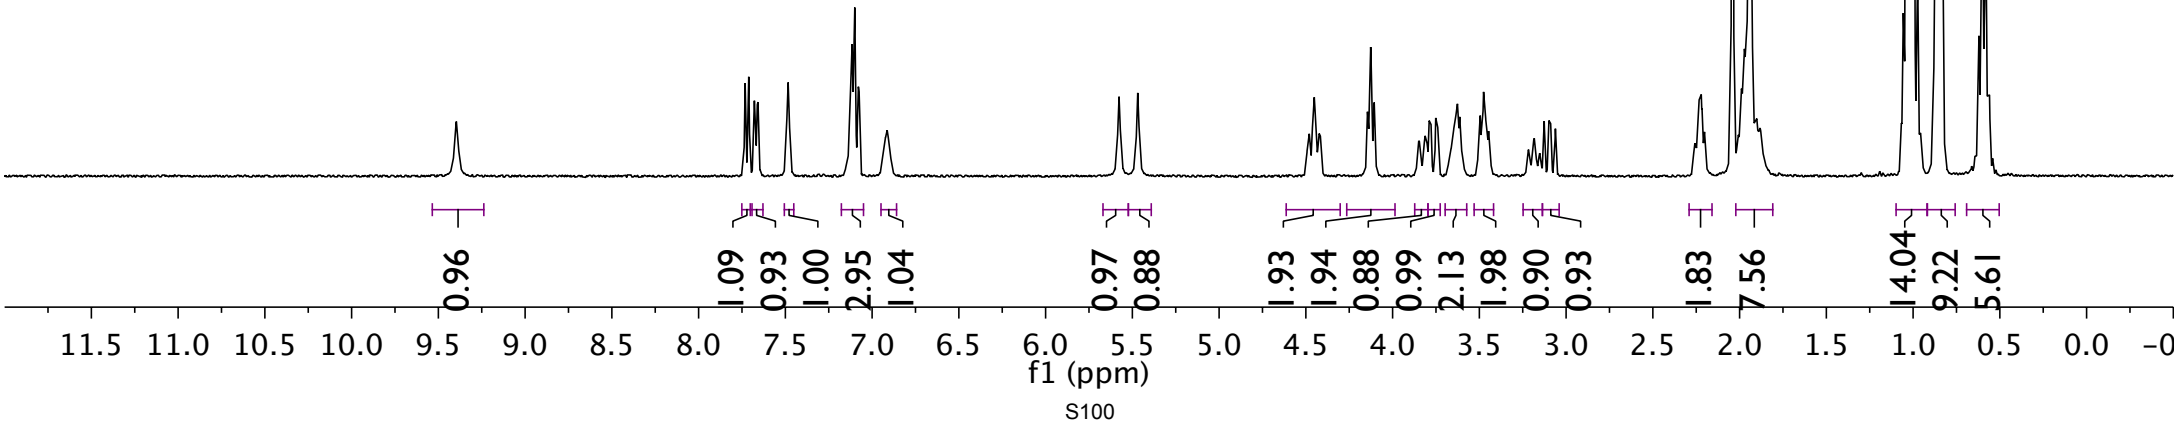

| Parameter | Value |
|-----------|-------|
| 11.06     |       |
| 11.05     |       |
| 7.99      |       |
| 7.87      |       |
| 7.74      |       |
| 7.73      |       |
| 7.68      |       |
| 7.67      |       |
| 7.48      |       |
| 7.46      |       |
| 7.46      |       |
| 7.44      |       |
| 7.43      |       |
| 7.28      |       |
| 7.28      |       |
| 7.16      |       |
| 7.15      |       |
| 7.15      |       |
| 7.14      |       |
| 7.14      |       |
| 7.14      |       |
| 7.13      |       |
| 7.12      |       |
| 7.11      |       |
| 7.10      |       |
| 7.09      |       |
| 4.40      |       |
| 4.36      |       |
| 4.10      |       |
| 4.09      |       |
| 4.09      |       |
| 4.08      |       |
| 4.08      |       |
| 4.07      |       |
| 4.07      |       |
| 3.41      |       |
| 3.39      |       |
| 3.39      |       |
| 3.38      |       |
| 3.37      |       |
| 3.37      |       |
| 3.36      |       |
| 3.35      |       |
| 3.32      |       |
| 3.31      |       |
| 3.30      |       |
| 3.29      |       |
| 3.29      |       |
| 3.28      |       |
| 3.28      |       |
| 3.27      |       |
| 3.26      |       |
| 3.25      |       |
| 3.25      |       |
| 3.17      |       |
| 3.16      |       |
| 3.14      |       |
| 3.13      |       |
| 2.00      |       |
| 1.99      |       |
| 1.99      |       |
| 1.70      |       |
| 1.69      |       |
| 1.68      |       |
| 1.66      |       |

Data File Name / Volumes/ data/ indy/ mkieffer/ vnmrsys/ data/ aspergilazine\_A\_DMSO/ PROTON01.fid/ fid  
 Title PROTON01  
 Origin Varian  
 Solvent dmso  
 Temperature 25.0  
 Pulse Sequence s2pul  
 Number of Scans 32  
 Receiver Gain 34  
 Relaxation Delay 5.0000  
 Pulse Width 4.9500  
 Acquisition Time 3.0000  
 Acquisition Date 2015-02-19T12:14:22  
 Spectrometer Frequency 499.68  
 Spectral Width 8000.0  
 Lowest Frequency -1018.9  
 Nucleus 1H  
 Acquired Size 24000  
 Spectral Size 65536

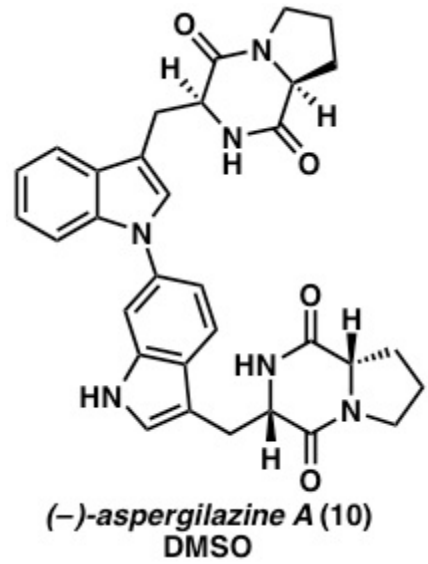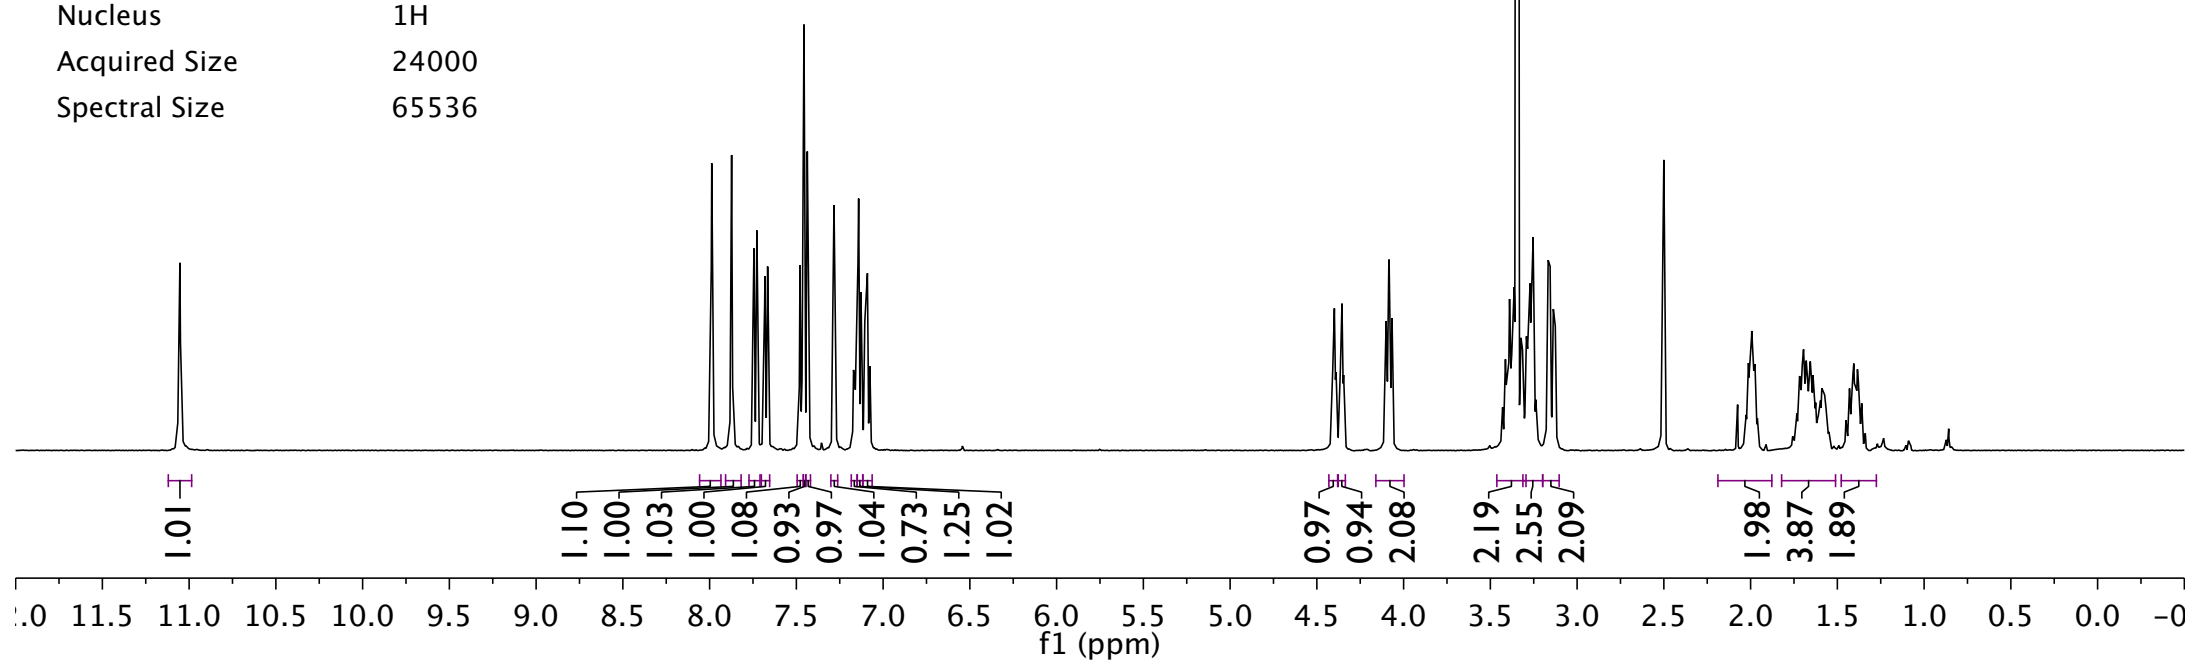

| Parameter              | Value                                                                                   |
|------------------------|-----------------------------------------------------------------------------------------|
| Data File Name         | / Volumes/ data/ indy/ mkieffer/ vnmrsys/ data/ aspergilazine_A_DMSO/ CARBON01.fid/ fid |
| Title                  | CARBON01                                                                                |
| Origin                 | Varian                                                                                  |
| Solvent                | dmsO                                                                                    |
| Temperature            | 25.0                                                                                    |
| Pulse Sequence         | s2pul                                                                                   |
| Number of Scans        | 1500                                                                                    |
| Receiver Gain          | 30                                                                                      |
| Relaxation Delay       | 1.0000                                                                                  |
| Pulse Width            | 4.2500                                                                                  |
| Acquisition Time       | 1.0420                                                                                  |
| Acquisition Date       | 2015-02-19T12:18:55                                                                     |
| Spectrometer Frequency | 125.66                                                                                  |
| Spectral Width         | 31446.5                                                                                 |
| Lowest Frequency       | -1957.1                                                                                 |
| Nucleus                | <sup>13</sup> C                                                                         |
| Acquired Size          | 32768                                                                                   |
| Spectral Size          | 65536                                                                                   |

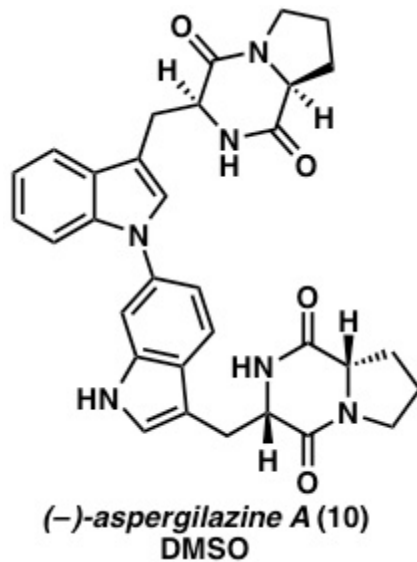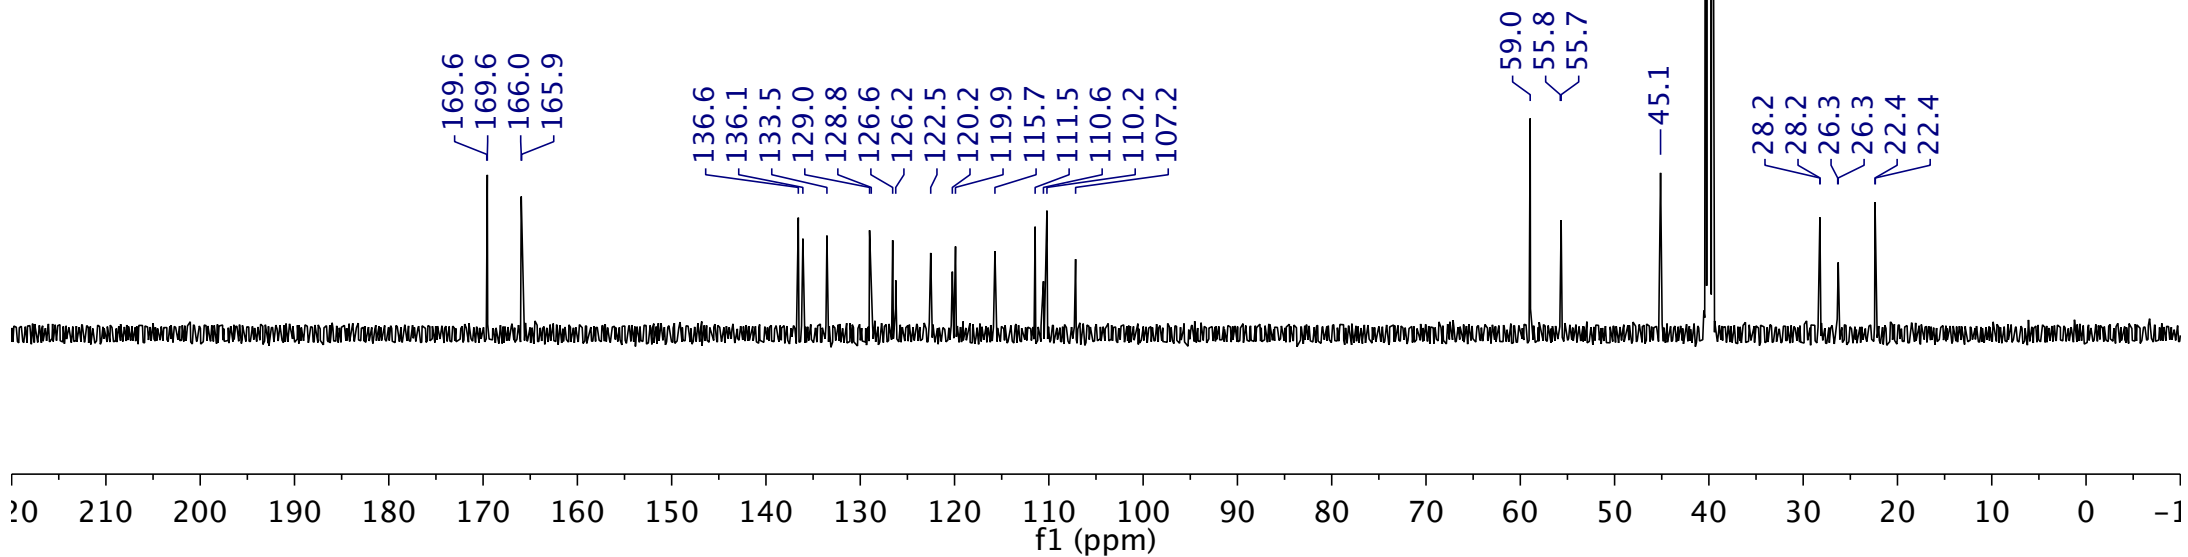

Parameter Value  
 8.71  
 7.76  
 7.75  
 7.75  
 7.74  
 7.57  
 7.55  
 7.46  
 7.46  
 7.45  
 7.45  
 7.45  
 7.44  
 7.33  
 7.23  
 7.18  
 7.18  
 7.17  
 7.17  
 7.17  
 7.16  
 7.15  
 7.14  
 7.13  
 7.13  
 7.10  
 7.10  
 5.97  
 4.42  
 4.05  
 4.03  
 4.02  
 3.64  
 3.63  
 3.61  
 3.60  
 3.55  
 3.53  
 3.51  
 3.50  
 3.23  
 3.21  
 3.02  
 3.00  
 2.99  
 2.97  
 2.22  
 2.16  
 1.93  
 1.92  
 1.91  
 1.91  
 1.90  
 1.89  
 1.86  
 1.85  
 1.75  
 1.74  
 1.73  
 1.72  
 1.72  
 1.71  
 1.70

Data File Name / Volumes/ data/ indy/ mkleffer/ vhmrsys/ data/ aspergilzine\_A\_CD2Cl2/ PROTON01.fid/ fid  
 Title PROTON01  
 Origin Varian  
 Solvent cd2cl2  
 Temperature 25.0  
 Pulse Sequence s2pul  
 Number of Scans 32  
 Receiver Gain 30  
 Relaxation Delay 5.0000  
 Pulse Width 4.9500  
 Acquisition Time 3.0000  
 Acquisition Date 2015-02-18T16:50:43  
 Spectrometer Frequency 499.68  
 Spectral Width 8000.0  
 Lowest Frequency -1032.0  
 Nucleus 1H  
 Acquired Size 24000  
 Spectral Size 65536

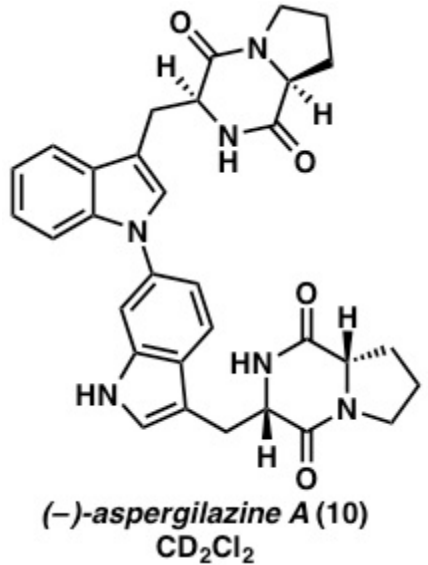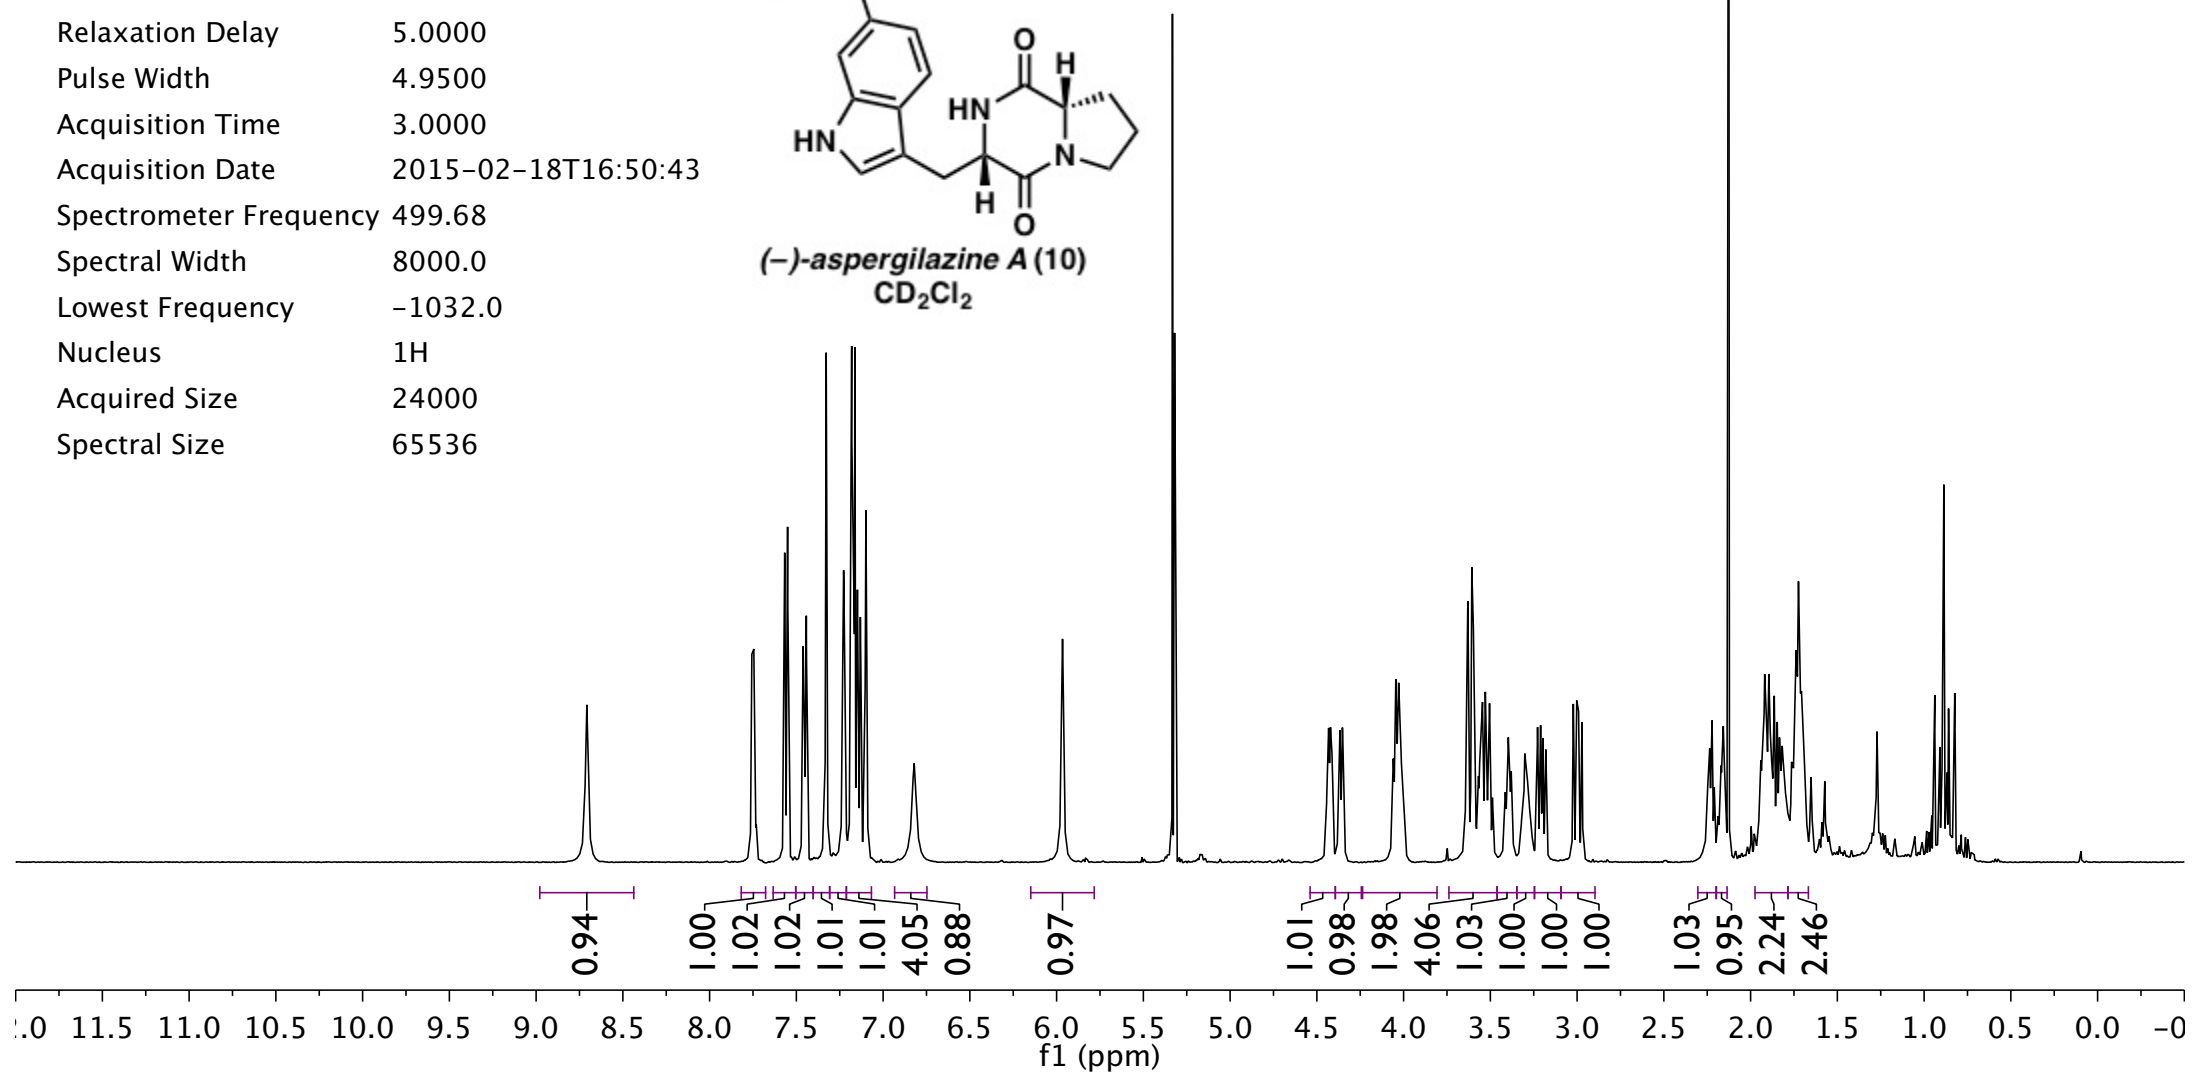

| Parameter              | Value                                                                                    |
|------------------------|------------------------------------------------------------------------------------------|
| Data File Name         | / Volumes/ data/ indy/ mkieffer/ vnmrsys/ data/ aspergilzine_A_CD2Cl2/ CARBON01.fid/ fid |
| Title                  | CARBON01                                                                                 |
| Origin                 | Varian                                                                                   |
| Solvent                | cd2cl2                                                                                   |
| Temperature            | 25.0                                                                                     |
| Pulse Sequence         | s2pul                                                                                    |
| Number of Scans        | 1500                                                                                     |
| Receiver Gain          | 30                                                                                       |
| Relaxation Delay       | 1.0000                                                                                   |
| Pulse Width            | 4.2500                                                                                   |
| Acquisition Time       | 1.0420                                                                                   |
| Acquisition Date       | 2015-02-18T16:55:16                                                                      |
| Spectrometer Frequency | 125.66                                                                                   |
| Spectral Width         | 31446.5                                                                                  |
| Lowest Frequency       | -1833.8                                                                                  |
| Nucleus                | 13C                                                                                      |
| Acquired Size          | 32768                                                                                    |
| Spectral Size          | 65536                                                                                    |

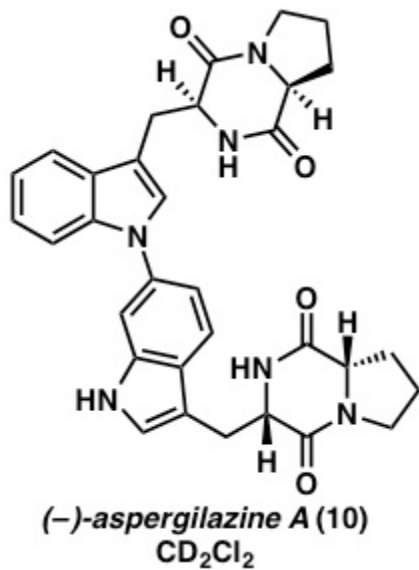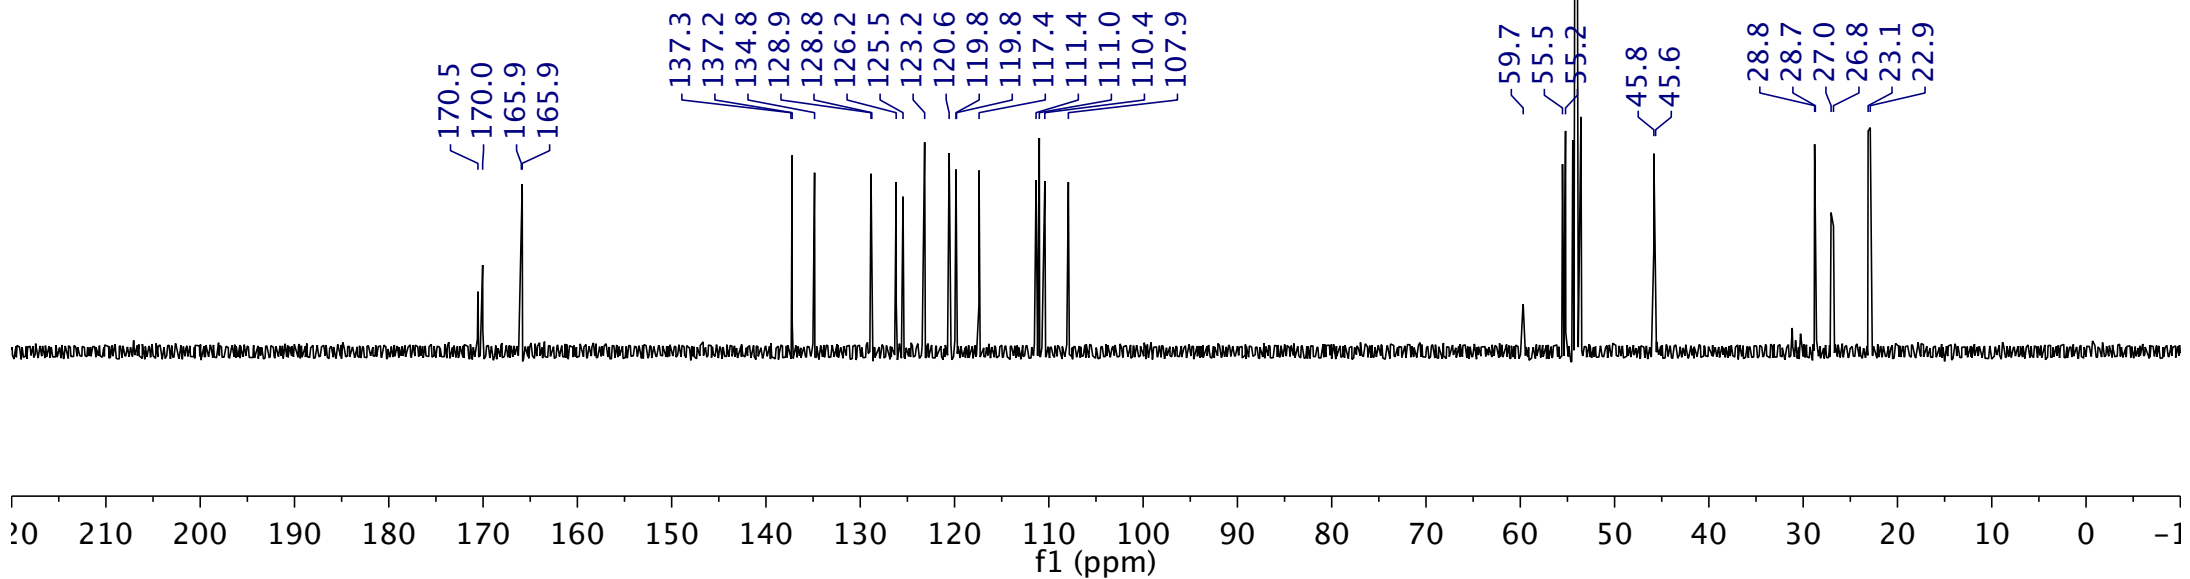

Supplement: NIHMS871735-supplement-Supplemental.pdf [file NIHMS871735-supplement-Supplemental.pdf]
